# Supplementary material for: An efficient genotyper and star-allele caller for pharmacogenomics
Source: HighWire-hosted journal article supplement (doi:10.1101/gr.277075.122), 2023-01-01
Supplement: Supplemental_Code.zip [file experiments.xlsx]

## Sheet: Summary
			PGx3									WGS													10X
Gene	Updated	N.V.	Total	Aldy 4		Aldy 3		Stargazer		Astrolabe		Total	Aldy 4		Aldy 3		StellarPGX		Stargazer		Astrolabe		Cyrius2D6		Total	Aldy 4		Aldy 3		StellarPGX		Stargazer		Astrolabe		Cyrius2D6
CYP2D6	0	0	137	134	3	135	2	68	69	71	66	70	69	1	63	7	65	5	50	20	43	27	70	0	95	78	17	57	38	54	41	44	51	51	44	62	33
CYP2A6	12	1	137	137	0	133	4	117	20	-		70	70	0	68	2	67	3	58	12	-		-		95	69	26	42	53	81	14	34	61	-		-
CYP1A1	31	0	96	78	18	79	17	78	18	-		66	66	0	66	0	-		64	2	-		-		89	88	1	89	0	-		56	33	-		-
CYP1A2	1	0	96	96	0	96	0	96	0	-		66	66	0	66	0	66	0	66	0	-		-		89	89	0	89	0	89	0	77	12	-		-
CYP2A13	20	0	96	96	0	96	0	96	0	-		66	66	0	66	0	-		59	7	-		-		89	89	0	89	0	-		64	25	-		-
CYP2B6	36	5	137	135	2	134	3	118	19	-		70	69	1	69	1	68	2	56	14	-		-		95	94	1	94	1	63	32	61	34	-		-
CYP2C8	5	0	137	137	0	137	0	137	0	135	2	70	70	0	70	0	-		58	12	68	2	-		95	94	1	95	0	-		64	31	93	2	-
CYP2C9	1	0	137	137	0	137	0	120	17	128	9	70	70	0	70	0	70	0	54	16	67	3	-		95	95	0	95	0	94	1	54	41	92	3	-
CYP2C19	3	0	137	137	0	137	0	128	9	137	0	70	69	1	69	1	69	1	67	3	70	0	-		95	94	1	95	0	62	33	65	30	95	0	-
CYP2F1	20	0	96	-		-		-		-		66	-		-		-		-		-		-		89	-		-		-		-		-		-
CYP2J2	1	0	96	96	0	96	0	85	11	-		66	66	0	66	0	-		51	15	-		-		89	89	0	89	0	-		58	31	-		-
CYP2S1	4	0	96	93	3	94	2	93	3	-		66	66	0	66	0	-		65	1	-		-		89	89	0	89	0	-		76	13	-		-
CYP3A4	0	0	137	137	0	137	0	128	9	-		70	70	0	70	0	70	0	49	21	-		-		95	95	0	95	0	91	4	51	44	-		-
CYP3A5	0	0	137	137	0	137	0	107	30	-		70	69	1	69	1	68	2	46	24	-		-		95	95	0	95	0	87	8	53	42	-		-
CYP3A7	7	0	96	96	0	96	0	45	51	-		66	66	0	66	0	-		54	12	-		-		89	89	0	88	1	-		49	40	-		-
CYP3A43	10	0	96	87	9	87	9	87	9	-		66	66	0	66	0	-		55	11	-		-		89	88	1	88	1	-		66	23	-		-
CYP4F2	11	0	137	137	0	137	0	124	13	137	0	70	70	0	70	0	66	4	57	13	26	44	-		95	94	1	95	0	88	7	49	46	36	59	-
DPYD	46	0	137	137	0	136	1	70	67	-		70	70	0	70	0	-		28	42	-		-		95	95	0	94	1	-		30	65	-		-
SLCO1B1	42	1	137	136	1	114	23	133	4	135	2	70	70	0	68	2	-		65	5	69	1	-		95	93	2	85	10	-		74	21	93	2	-
TPMT	0	0	137	137	0	137	0	137	0	137	0	70	70	0	70	0	-		63	7	70	0	-		95	95	0	95	0	-		80	15	95	0	-
Accuracy				0.984456		0.973661		0.849309		0.917623			0.996928		0.989247		0.972843		0.817972		0.842857		1			0.971072		0.940442		0.8351		0.626773		0.834586		0.652632
													0.984152		0.967784		0.903972		0.764685		0.865022		0.826316
	Dataset 1							Dataset 2
Gene	Updated	N.V.	Total	Aldy 4		Astrolabe		Updated	N.V.	Total	Aldy 4		Astrolabe
CYP2D6	6	1	24	22	2	9	15	0	0	21	18	3	14	7
CYP1A2	1	0	24	24	0	-		0	0	21	21	0	-
CYP2B6	8	0	24	24	0	-		6	0	21	21	0	-
CYP2C8	2	0	24	24	0	15	9	0	0	21	21	0	12	9
CYP2C9	3	0	24	24	0	23	1	0	0	21	20	1	20	1
CYP2C19	4	0	24	24	0	9	15	2	0	21	21	0	20	1
CYP3A4	14	0	24	24	0	-		0	0	21	21	0	-
CYP3A5	0	0	24	24	0	-		0	0	21	21	0	-
CYP4F2	0	0	24	24	0	13	11	1	0	21	21	0	12	9
DPYD	20	0	24	24	0	-		8	0	21	21	0	-
SLCO1B1	8	0	24	24	0	24	0	8	0	21	20	1	21	0
TPMT	1	0	24	24	0	18	6	0	0	21	21	0	19	2
Accuracy				0.993056		0.660714					0.980159		0.802721
Ambiguous calls	Aldy 4		Aldy 3		Stargazer		Astrolabe		Aldy 4		Aldy 3		StellarPGX		Stargazer		Astrolabe		Aldy 4		Aldy 3		StellarPGX		Stargazer		Astrolabe		Aldy 4		Astrolabe
CYP2D6	1		0		0		47		0		2		0		12		0		1		5		0		10		0		0		22
CYP2A6	1		1		0		0		0		0		1		0		0		0		1		0		4		0
CYP1A1	0		0		0		0		2		2		0		0		0		0		9		0		4		0
CYP1A2	0		0		0		0		0		0		0		0		0		0		0		0		2		0		0		0
CYP2A13	0		0		0		0		0		0		0		0		0		0		0		0		0		0
CYP2B6	0		0		0		0		1		1		13		2		0		0		5		14		15		0		0		0
CYP2C8	0		0		0		2		0		0		0		0		0		0		0		0		0		0		0		0
CYP2C9	0		0		0		1		0		0		0		0		0		0		0		0		1		0		0		22
CYP2C19	1		1		0		1		0		0		0		3		0		0		0		0		11		0		0		43
CYP2F1	0		0		0		0		0		0		0		0		0		0		0		0		0		0
CYP2J2	0		0		0		0		0		0		0		0		0		0		0		0		0		0
CYP2S1	0		0		0		0		0		0		0		0		0		0		0		0		0		0
CYP3A4	0		0		0		0		0		0		0		0		0		0		0		0		0		0		0		0
CYP3A5	1		1		0		0		1		1		0		0		0		1		1		0		0		0		0		0
CYP3A7	0		0		0		0		0		0		0		1		0		0		0		0		2		0
CYP3A43	1		1		0		0		9		9		0		0		0		4		9		0		3		0
CYP4F2	21		21		0		119		7		7		0		1		0		2		14		0		7		0		1		0
DPYD	0		0		0		0		0		0		0		0		0		1		1		0		0		0		2		0
SLCO1B1	7		17		0		8		3		12		0		6		4		0		15		0		10		5		0		44
TPMT	5		5		0		4		0		0		0		0		1		0		3		0		0		2		0		0
	38	0.0164076	47	0.0202936	0	0	182	0.189781	23	0.0176651	34	0.0261137	14	0.0223642	25	0.0192012	5	0.0102041	9	0.00510493	63	0.0357345	14	0.01649	69	0.0391378	7	0.0105263	3	0.00555556	131	0.415873
		0.0111833		0.0273806		0.0194464		0.156596						0.0194271

## Sheet: Short Reads
		Validations / Ground Truth			PGRNseq v.3										WGS													10X
Sample	Gene	GeT-RM	Updated Call		Aldy 4		Aldy 3		StellarPGX		Stargazer		Astrolabe			Aldy		Aldy 3		StellarPGX		Stargazer		Astrolabe		Cyrius			Aldy		Aldy 3		StellarPGX		Stargazer		Astrolabe		Cyrius
HG00276	CYP1A1	1/1			1/1	1	1/1	1			1/1	1			1	1/1	1	1/1	1			1/1	1					1	1/1	1	1/1	1			1/1	1
HG00436	CYP1A1	1/1	1/13	1	1/13	1	1/13	1			1/13	1			1	1/13	1	1/13	1			1/13	1					0
HG00589	CYP1A1	2/2			2C/2C	1	2C/2C	1			2C/2C	1			1	2B/2B	1	2B/2B	1			2B/2B	1					1	2B/2B	1	2B/2B	1			2C/2C	1
HG01190	CYP1A1	1/1			1/1	1	1/1	1			1/1	1			1	1/1	1	1/1	1			1/1	1					1	1/1	1	1/1	1			1/1+1	0
NA06991	CYP1A1	1/1			1/1	1	1/1	1			1/1	1			1	1/1	1	1/1	1			1/1	1					1	1/1	1	1/1	1			1/1+1+1	0
NA07019	CYP1A1	1/4			1/4	1	1/4	1			1/4	1			1	1/4	1	1/4	1			1/4	1					1	1/4	1	1/4	1			1/4	1
NA07029	CYP1A1	1/1			1/1	1	1/1	1			1/1	1			1	1/1	1	1/1	1			1/1	1					1	1/1	1	1/1	1			1/1	1
NA07055	CYP1A1	1/5			1/5	1	1/5	1			1/5	1			1	1/5	1	1/5	1			1/5	1					1	1/5	1	1/5	1			5/1	1
NA07056	CYP1A1	1/1			1/1	1	1/1	1			1/1	1			1	1/1	1	1/1	1			1/1	1					1	1/1	1	1/1	1			1/1	1
NA07348	CYP1A1	1/1			1/1	1	1/1	1			1/1	1			1	1/1	1	1/1	1			1/1	1					1	1/1	1	1/1	1			1/1	1
NA07357	CYP1A1	1/1			1/1	1	1/1	1			1/1	1			1	1/1	1	1/1	1			1/1	1					1	1/1	1	1/1	1			1/1	1
NA07439	CYP1A1	1/1	1/2A	1	1/1	0	1/1	0			1/1	0			0													1	1/2	1	1/2	1			1/2A	1
NA10831	CYP1A1	1/1			1/1	1	1/1	1			1/1	1			1	1/1	1	1/1	1			1/1	1					1	1/1	1	1/1	1			1/1+1	0
NA10847	CYP1A1	1/1			1/1	1	1/1	1			1/1	1			1	1/1	1	1/1	1			1/1	1					1	1/1	1	1/1	1			1/1	1
NA10851	CYP1A1	1/1	1/2A	1	1/1	0	1/1	0			1/1	0			1	1/2	1	1/2	1			1/2A	1					1	1/2	1	1/2	1			1/1	0
NA10854	CYP1A1	1/1			1/1	1	1/1	1			1/1	1			1	1/1	1	1/1	1			1/1	1					1	1/1	1	1/1	1			1/1+1	0
NA11832	CYP1A1	1/1			1/1	1	1/1	1			1/1	1			1	1/1	1	1/1	1			1/1	1					1	1/1	1	1/1	1			1/1	1
NA11839	CYP1A1	1/1			1/1	1	1/1	1			1/1	1			1	1/1	1	1/1	1			1/1	1					1	1/1	1	1/1	1			1/1	1
NA11993	CYP1A1	1/1			1/1	1	1/1	1			1/1	1			1	1/1	1	1/1	1			1/1	1					1	1/1	1	1/1	1			1/1+1	0
NA12003	CYP1A1	1/1			1/1	1	1/1	1			1/1	1			1	1/1	1	1/1	1			1/1	1					1	1/1	1	1/1	1			1/1	1
NA12006	CYP1A1	1/4			1/4	1	1/4	1			1/4	1			1	1/4	1	1/4	1			1/4	1					1	1/4	1	1/4	1			1/4	1
NA12145	CYP1A1	1/1			1/1	1	1/1	1			1/1	1			1	1/1	1	1/1	1			1/1	1					1	1/1	1	1/1	1			1/1+1	0
NA12156	CYP1A1	1/2	1/2B;2A/2C	1	1/2C	1	1/2C	1			1/2C	1			1	1/2B;2/2C	1	1/2B;2/2C	1			1/2B	1					1	1/2B	1	1/2B;2/2C	1			1/2C	1
NA12236	CYP1A1	1/4			1/4	1	1/4	1			1/4	1			0													1	1/4	1	1/4	1			4/1	1
NA12717	CYP1A1	1/1			1/1	1	1/1	1			1/1	1			1	1/1	1	1/1	1			1/1	1					1	1/1	1	1/1	1			1/1	1
NA12813	CYP1A1	1/2	1/2B;2A/2C	1	1/2C	1	1/2C	1			1/2C	1			1	2/2B	1	2/2B	1			2A/2B	1					1	2/2B	1	2/2B	1			1/2C	1
NA12873	CYP1A1	1/1			1/1	1	1/1	1			1/1	1			1	1/1	1	1/1	1			1/1+1	0					1	1/1	1	1/1	1			1/1	1
NA12878	CYP1A1	1/1			1/1	1	1/1	1			1/1	1			0													0
NA15245	CYP1A1	1/1			1/1	1	1/1	1			1/1	1			0													1	1/1	1	1/1	1			1/1	1
NA17074	CYP1A1	1/1	2A/2A	1	1/1	0	1/1	0			1/1	0			0													1	2/2	1	2/2	1			2A/2Ax2	0
NA17204	CYP1A1	1/1			1/1	1	1/1	1			1/1	1			0													1	1/1	1	1/1	1			1/1	1
NA17227	CYP1A1	1/1			1/1	1	1/1	1			1/1	1			0													1	1/1	1	1/1	1			1/1	1
NA17234	CYP1A1	1/1	2A/2A	1	1/1	0	1/1	0			1/1	0			0													1	2/2	1	2/2	1			2A/2Ax2	0
NA17235	CYP1A1	1/1			1/1	1	1/1	1			1/1	1			0													1	1/1	1	1/1	1			1/1	1
NA17244	CYP1A1	1/1			1/1	1	1/1	1			1/1	1			0													1	1/1	1	1/1	1			1/1+1+1	0
NA17448	CYP1A1	2/2			2C/2C	1	2C/2C	1			2C/2C	1			0													1	2B/2B	1	2B/2B	1			2B/2Bx2	0
NA17454	CYP1A1	1/1			1/1	1	1/1	1			1/1	1			0													1	1/1	1	1/1	1			1/1	1
NA17641	CYP1A1	1/1	1/2A	1	1/1	0	1/1	0			1/1	0			0													1	1/2	1	1/2	1			2A/1	1
NA17642	CYP1A1	1/1			1/1	1	1/1	1			1/1	1			0													1	1/1	1	1/1	1			1/1	1
NA17657	CYP1A1	1/2			1/2C	1	1/2C	1			1/2C	1			0													1	1/2B	1	1/2B;2/2C	1			[2B,2A,2C]/1	1
NA17658	CYP1A1	1/2			1/2C	1	1/2C	1			1/2C	1			0													1	1/2B	1	1/2B;2/2C	1			1/2B	1
NA17660	CYP1A1	1/2			1/2C	1	1/2C	1			1/2C	1			0													1	1/2B	1	1/2B;2/2C	1			1/2B	1
NA17673	CYP1A1	1/2			1/2C	1	1/2C	1			1/2C	1			0													1	1/2B	1	1/2B;2/2C	1			1/2B	1
NA17679	CYP1A1	1/2			1/2C	1	1/2C	1			1/2C	1			0													1	2/2B	0	1/2B;2/2B;2/2C	1			1/2B	1
NA17702	CYP1A1	1/2			1/2C	1	1/2C	1			1/2C	1			0													1	1/2B	1	1/2B;2/2C	1			1/2B	1
NA18484	CYP1A1	1/1			1/1	1	1/1	1			1/1	1			1	1/1	1	1/1	1			1/1	1					1	1/1	1	1/1	1			1/1+1	0
NA18509	CYP1A1	1/1			1/1	1	1/1	1			1/1	1			1	1/1	1	1/1	1			1/1	1					1	1/1	1	1/1	1			1/1+1	0
NA18518	CYP1A1	1/1			1/1	1	1/1	1			1/1	1			1	1/1	1	1/1	1			1/1	1					1	1/1	1	1/1	1			1/1+1	0
NA18519	CYP1A1	1/1			1/1	1	1/1	1			1/1	1			1	1/1	1	1/1	1			1/1	1					1	1/1	1	1/1	1			1/1	1
NA18524	CYP1A1	1/1			1/1	1	1/1	1			1/1	1			1	1/1	1	1/1	1			1/1+1	0					1	1/1	1	1/1	1			1/1	1
NA18526	CYP1A1	1/1	2A/11	1	1/11	0	1/11	0			1/11	0			1	2/11	1	2/11	1			2A/11	1					1	2/11	1	2/11	1			1/11	0
NA18540	CYP1A1	1/2	2/13	1	2C/13	1	2C/13	1			2C/13	1			1	2B/13	1	2B/13	1			2B/13	1					1	2B/13	1	2B/13	1			[2B,2A,2C]/13	1
NA18544	CYP1A1	1/2	2A/2B	1	1/2C	0		0			1/2C	0			1	2/2B	1	2/2B	1			2A/2B	1					1	2/2B	1	2/2B	1			1/2C	0
NA18552	CYP1A1	1/1			1/1	1	1/1	1			1/1	1			1	1/1	1	1/1	1			1/1	1					1	1/1	1	1/1	1			1/1	1
NA18564	CYP1A1	1/1	1/13	1	1/13	1	1/13	1			1/13	1			1	1/13	1	1/13	1			1/13	1					1	1/13	1	1/13	1			1/13	1
NA18565	CYP1A1	2/2			2C/2C	1	2C/2C	1			2C/2C	1			1	2B/2B	1	2B/2B	1			2B/2B	1					1	2B/2B	1	2B/2B	1			2C/2C	1
NA18855	CYP1A1	1/1			1/1	1	1/1	1			1/1	1			1	1/1	1	1/1	1			1/1	1					1	1/1	1	1/1	1			1/1	1
NA18861	CYP1A1	1/1			1/1	1	1/1	1			1/1	1			1	1/1	1	1/1	1			1/1	1					1	1/1	1	1/1	1			1/1+1	0
NA18868	CYP1A1	1/1	1/2	1	1/1	0	1/2	1			1/1	0			1	1/2	1	1/2	1			1/2A	1					1	1/2	1	1/2	1			1/1+1	0
NA18942	CYP1A1	1/1	13/13	1	13/13	1	13/13	1			13/13	1			1	13/13	1	13/13	1			13/13	1					1	13/13	1	13/13	1			13/13	1
NA18952	CYP1A1	1/2	2/13	1	2C/13	1	2C/13	1			2C/13	1			1	2B/13	1	2B/13	1			2B/13	1					1	2B/13	1	2B/13	1			1/2C	0
NA18959	CYP1A1	1/1			1/1	1	1/1	1			1/1	1			1	1/1	1	1/1	1			1/1	1					1	1/1	1	1/1	1			1/1+1	0
NA18966	CYP1A1	1/1			1/1	1	1/1	1			1/1	1			1	1/1	1	1/1	1			1/1	1					1	1/1	1	1/1	1			1/1+1	0
NA18973	CYP1A1	1/1			1/1	1	1/1	1			1/1	1			1	1/1	1	1/1	1			1/1	1					1	1/1	1	1/1	1			1/1	1
NA18980	CYP1A1	1/2	2/13	1	2C/13	1	2C/13	1			2C/13	1			1	2B/13	1	2B/13	1			2B/13	1					1	2B/13	1	2B/13	1			1/[2C,13]	0
NA18992	CYP1A1	1/1	1/13	1	1/13	1	1/13	1			1/13	1			1	1/13	1	1/13	1			1/13	1					1	1/13	1	1/13	1			1/13	1
NA19003	CYP1A1	1/1	1/13	1	1/13	1	1/13	1			1/13	1			1	1/13	1	1/13	1			1/13	1					1	1/13	1	1/13	1			1/13	1
NA19007	CYP1A1	1/2	2/13	1	2C/13	1	2C/13	1			2C/13	1			1	2B/13	1	2B/13	1			2B/13	1					1	2B/13	1	2B/13	1			1/2C	0
NA19095	CYP1A1	1/1			1/1	1	1/1	1			1/1	1			1	1/1	1	1/1	1			1/1	1					1	1/1	1	1/1	1			1/1	1
NA19109	CYP1A1	1/1			1/1	1	1/1	1			1/1	1			1	1/1	1	1/1	1			1/1	1					1	1/1	1	1/1	1			1/1	1
NA19122	CYP1A1	1/1			1/1	1	1/1	1			1/1	1			1	1/1	1	1/1	1			1/1	1					1	1/1	1	1/1	1			1/1+1	0
NA19143	CYP1A1	1/1	1/2A	1	1/1	0	1/1	0			1/1	0			1	1/2	1	1/2	1			1/2A	1					1	1/2	1	1/2	1			1/1	0
NA19147	CYP1A1	1/1			1/1	1	1/1	1			1/1	1			1	1/1	1	1/1	1			1/1	1					1	1/1	1	1/1	1			1/1	1
NA19174	CYP1A1	1/1	1/2A	1	1/1	0	1/1	0			1/1	0			1	1/2	1	1/2	1			1/2A	1					1	1/2	1	1/2	1			1/2A	1
NA19176	CYP1A1	1/1			1/1	1	1/1	1			1/1	1			1	1/1	1	1/1	1			1/1	1					1	1/1	1	1/1	1			1/1+1	0
NA19178	CYP1A1	1/1	1/2A	1	1/1	0	1/1	0			1/1	0			1	1/2	1	1/2	1			1/2A	1					1	1/2	1	1/2	1			2A/1	1
NA19207	CYP1A1	1/1	1/2A	1	1/1	0		0			1/1	0			1	1/2	1	1/2	1			1/2A	1					1	1/2	1	1/2	1			1/1+1	0
NA19213	CYP1A1	1/1			1/1	1	1/1	1			1/1	1			1	1/1	1	1/1	1			1/1	1					1	1/1	1	1/1	1			1/1	1
NA19226	CYP1A1	1/1			1/1	1	1/1	1			1/1	1			1	1/1	1	1/1	1			1/1	1					1	1/1	1	1/1	1			1/1	1
NA19239	CYP1A1	1/1	1/2A	1	1/1	0	1/1	0			1/1	0			1	1/2	1	1/2	1			1/2A	1					1	1/2	1	1/2	1			1/1+1	0
NA19789	CYP1A1	1/2	1/2B;2A/2C	1	2/2B	1	2/2B	1			2A/2B	1			1	1/2B;2/2C	1	1/2B;2/2C	1			1/2B	1					1	1/2B	1	1/2B;2/2C	1			1/2C	1
NA19819	CYP1A1	1/1	1/2A	1	1/1	0	1/1	0			1/1	0			1	1/2	1	1/2	1			1/2A	1					1	1/2	1	1/2	1			1/1+1	0
NA19908	CYP1A1	1/2	2A/2B	1	1/2C	0	1/2C	0			1/2C	0			1	2/2B	1	2/2B	1			2A/2B	1					1	2/2B	1	2/2B	1			1/2C	0
NA19920	CYP1A1	1/1			1/1	1	1/1	1			1/1	1			1	1/1	1	1/1	1			1/1	1					1	1/1	1	1/1	1			1/1	1
NA20296	CYP1A1	1/1	1/2A	1	1/1	0	1/1	0			1/1	0			1	1/2	1	1/2	1			1/2A	1					1	1/2	1	1/2	1			1/1	0
NA20509	CYP1A1	1/1	1/2A	1	1/1	0	1/1	0			1/1	0			1	1/2	1	1/2	1			1/2A	1					1	1/2	1	1/2	1			1/1+1	0
NA23246	CYP1A1	1/2	2B/13	1	2C/13	1	2B/13*	1			2C/13	1			0													1	2B/13	1	2B/13	1			2B/13	1
NA23275	CYP1A1	1/1			1/1	1	1/1	1			1/1	1			0													1	1/1	1	1/1	1			1/1+1	0
NA23313	CYP1A1	1/1			1/1	1	1/1	1			1/1	1			0													0
NA23348	CYP1A1	1/1			1/1	1	1/1	1			1/1	1			0													1	1/1	1	1/1	1			1/1	1
NA23873	CYP1A1	1/1			1/1	1	1/1	1			1/1	1			0													0
NA23874	CYP1A1	1/1			1/1	1	1/1	1			1/1	1			0													1	1/1	1	1/1	1			1/1	1
NA23877	CYP1A1	1/1			1/1	1	1/1	1			1/1	1			0													0
NA24008	CYP1A1	1/2	2A/2B	1	1/2C	0		0			1/2C	0			0													1	2/2B	1	2/2B	1			2A/[2B,2A,2C]	1
NA24009	CYP1A1	1/1			1/1	1	1/1	1			1/1	1			0													0
NA24217	CYP1A1	1/1			1/1	1	1/1	1			1/1	1			0													0
HG00276	CYP1A2	1A/1F			1A/1F	1	1B/1F	1	1B/1M	1	1/1F	1			1	1A/1F	1	1B/1F	1	1B/1M	1	1/1F	1					1	1A/1F	1	1B/1F	1	1B/1M	1	1/1	1
HG00436	CYP1A2	1A/1F			1A/1F	1	1B/1F	1	1B/1M	1	1/1F	1			1	1A/1F	1	1B/1F	1	1B/1M	1	1/1F	1					0
HG00589	CYP1A2	1A/1L;1C/1F			1A/1L	1	1B/1L	1	1A/1F	1	1/1F	1			1	1A/1L	1	1B/1L	1	1B/1L	1	1/1L	1					1	1A/1L	1	1B/1L	1	1B/1L	1	1/1	1
HG01190	CYP1A2	1A/1A			1A/1A	1	1B/1B	1	1B/1B	1	1/1	1			1	1A/1A	1	1B/1B	1	1B/1B	1	1/1	1					1	1A/1A	1	1B/1B	1	1B/1B	1	1/1+1	0
NA06991	CYP1A2	1F/1F			1F/1F	1	1F/1F	1	1M/1M	1	1F/1F	1			1	1F/1F	1	1F/1F	1	1M/1M	1	1F/1F	1					1	1F/1F	1	1F/1F	1	1M/1M	1	1F/1Fx2	0
NA07019	CYP1A2	1A/1F			1A/1F	1	1B/1F	1	17/1B	0	1/1F	1			1	1A/1F	1	1B/1F	1	1B/1M	1	1/1F	1					1	1A/1F	1	1B/1F	1	1B/1M	1	1/1F	1
NA07029	CYP1A2	1A/1F			1A/1F	1	1B/1F	1	1B/1M	1	1/1F	1			1	1A/1F	1	1B/1F	1	1B/1M	1	1/1F	1					1	1A/1F	1	1B/1F	1	1B/1M	1	1/1F	1
NA07055	CYP1A2	1F/1F			1F/1F	1	1F/1F	1	1M/1M	1	1F/1F	1			1	1F/1F	1	1F/1F	1	1M/1M	1	1F/1F	1					1	1F/1F	1	1F/1F	1	1M/1M	1	1F/1F	1
NA07056	CYP1A2	1A/1A			1A/1A	1	1B/1B	1	1B/1B	1	1/1	1			1	1A/1A	1	1B/1B	1	1B/1B	1	1/1	1					1	1A/1A	1	1B/1B	1	1B/1B	1	1/1	1
NA07348	CYP1A2	1F/1F			1F/1F	1	1F/1F	1	1M/1M	1	1F/1F	1			1	1F/1F	1	1F/1F	1	1M/1M	1	1F/1F	1					1	1F/1F	1	1F/1F	1	1M/1M	1	1F/1F	1
NA07357	CYP1A2	1F/1F			1F/1F	1	1F/1F	1	1M/1M	1	1F/1F	1			1	1F/1F	1	1F/1F	1	1M/1M	1	1F/1F	1					1	1F/1F	1	1F/1F	1	1M/1M	1	1/1	1
NA07439	CYP1A2	1F/1L			1L/1L*	1	1L/1L*	1	1F/1J	1	1F/1F	1			0													1	1L/1L*	1	1L/1L*	1	1L/1W	1	1C/1	1
NA10831	CYP1A2	1A/1F			1A/1F	1	1B/1F	1	17/1B	0	1/1F	1			1	1A/1F	1	1B/1F	1	1B/1M	1	1/1F	1					1	1A/1F	1	1B/1F	1	1B/1M	1	1/1F	1
NA10847	CYP1A2	1F/1F			1F/1F	1	1F/1F	1	1M/1M	1	1F/1F	1			1	1F/1F	1	1F/1F	1	1M/1M	1	1F/1F	1					1	1F/1F	1	1F/1F	1	1M/1M	1	1/1	1
NA10851	CYP1A2	1F/1F			1F/1L	1	1F/1L	1	1B/1F	1	1F/1F	1			1	1F/1L	1	1F/1L	1	1M/1N	1	1F/1F	1					1	1F/1L	1	1F/1L	1	1M/1N	1	1/1	1
NA10854	CYP1A2	1A/1A			1A/1A	1	1B/1B	1	1B/1B	1	1/1	1			1	1A/1A	1	1B/1B	1	1B/1B	1	1/1	1					1	1A/1A	1	1B/1B	1	1B/1B	1	1/1	1
NA11832	CYP1A2	1F/1F			1F/1F	1	1F/1F	1			1F/1F	1			1	1F/1F	1	1F/1F	1	1M/1M	1	1F/1F	1					1	1F/1F	1	1F/1F	1	1M/1M	1	1/1	1
NA11839	CYP1A2	1A/1F			1A/1F	1	1B/1F	1	1B/1M	1	1/1F	1			1	1A/1F	1	1B/1F	1	1B/1M	1	1/1F	1					1	1A/1F	1	1B/1F	1	1B/1M	1	1/1F	1
NA11993	CYP1A2	1F/1F			1F/1F	1	1F/1F	1	1M/1M	1	1F/1F	1			1	1F/1F	1	1F/1F	1	1M/1M	1	1F/1F	1					1	1F/1F	1	1F/1F	1	1M/1M	1	1F/1Fx2	0
NA12003	CYP1A2	1A/1F			1F/1F	1	1F/1F	1	1M/1M	1	1F/1F	1			1	1F/1F	1	1F/1F	1	1M/1M	1	1F/1F	1					1	1F/1F	1	1F/1F	1	1M/1M	1	1/1	1
NA12006	CYP1A2	1F/1F			1F/1F	1	1F/1F	1	1M/1M	1	1F/1F	1			1	1F/1F	1	1F/1F	1	1M/1M	1	1F/1F	1					1	1F/1F	1	1F/1F	1	1M/1M	1	1/1	1
NA12145	CYP1A2	1A/1A			1A/1A	1	1B/1B	1	1B/1B	1	1/1	1			1	1A/1A	1	1B/1B	1	1B/1B	1	1/1	1					1	1A/1A	1	1B/1B	1	1B/1B	1	1/1	1
NA12156	CYP1A2	1A/1F			1A/1F	1	1B/1F	1	17/1B	0	1/1F	1			1	1A/1F	1	1B/1F	1	1B/1M	1	1/1F	1					1	1A/1F	1	1B/1F	1	1B/1M	1	1/1+1	0
NA12236	CYP1A2	1F/1F			1F/1F	1	1F/1F	1	1M/1M	1	1F/1F	1			0													1	1F/1F	1	1F/1F	1	1M/1M	1	1F/1F	1
NA12717	CYP1A2	1F/1F			1F/1F	1	1F/1F	1	1M/1M	1	1F/1F	1			1	1F/1F	1	1F/1F	1	1M/1M	1	1F/1F	1					1	1F/1F	1	1F/1F	1	1M/1M	1	1/1	1
NA12813	CYP1A2	1F/1L			1L/1L	1	1L/1L	1	1F/1F	1	1F/1F	1			1	1L/1L	1	1L/1L	1	1L/1N	1	1F/1L	1					1	1L/1L	1	1L/1L	1	1L/1N	1	1/1	1
NA12873	CYP1A2	1A/1F			1A/1F	1	1B/1F	1	1B/1M	1	1/1F	1			1	1A/1F	1	1B/1F	1	1B/1M	1	1/1F	1					1	1A/1F	1	1B/1F	1	1B/1M	1	1/1	1
NA12878	CYP1A2	1F/1F			1F/1F	1	1F/1F	1	1M/1M	1	1F/1F	1			0													0
NA15245	CYP1A2	1F/1F			1F/1F	1	1F/1F	1	1M/1M	1	1F/1F	1			0													1	1F/1F	1	1F/1F	1	1M/1M	1	1F/1F	1
NA17074	CYP1A2	1F/1F			1L/1L	1	1L/1L	1	1B/1G	1	1F/1F	1			0													1	1L/1L	1	1L/1L	1	1N/1W	1	1F/1Fx2	0
NA17204	CYP1A2	1F/1F			1F/1F	1	1F/1F	1	1M/1M	1	1F/1F	1			0													1	1F/1F	1	1F/1F	1	1M/1M	1	1F/1F	1
NA17227	CYP1A2	1F/1F			1F/1F	1	1F/1F	1	1M/1M	1	1F/1F	1			0													1	1F/1F	1	1F/1F	1	1M/1M	1	1F/1F	1
NA17234	CYP1A2	1F/1K			1K*/1L	1	1K*/1L	1	1F/1K	1	1F/1F	1			0													1	1K*/1L	1	1K*/1L	1	1N/1W	1	1F/1Fx2	0
NA17235	CYP1A2	1A/1F			1A/1F	1	1B/1F	1	1B/1F	1	1/1F	1			0													1	1A/1F	1	1B/1F	1	1B/1M	1	1/1F	1
NA17244	CYP1A2	1A/1F			1A/1F	1	1B/1F	1	1A/1F	1	1/1F	1			0													1	1A/1F	1	1B/1F	1	1B/1M	1	1/1F	1
NA17448	CYP1A2	1L/1L			1L/1L	1	1L/1L	1	1F/1F	1	1F/1F	1			0													1	1L/1L	1	1L/1L	1	1L/1L	1	1C/1C	1
NA17454	CYP1A2	1F/1F			1F/1F	1	1F/1F	1	1M/1M	1	1F/1F	1			0													1	1F/1F	1	1F/1F	1	1M/1M	1	1F/1F	1
NA17641	CYP1A2	1F/1F			1F/1L	1	1F/1L	1	1M/1N	1	1F/1F	1			0													1	1F/1L	1	1F/1L	1	1M/1N	1	1F/1F	1
NA17642	CYP1A2	1A/1F			1A/1L	1	1B/1L	1	1B/1N	1	1/1F	1			0													1	1A/1L	1	1B/1L	1	1B/1N	1	1/1F	1
NA17657	CYP1A2	1F/1L			1F/1L	1	1F/1L	1	1F/1M	1	1F/1F	1			0													1	1F/1L	1	1F/1L	1	1L/1M	1	1C/1F	1
NA17658	CYP1A2	1F/1L			1F/1L	1	1F/1L	1	1B/1M	1	1F/1F	1			0													1	1F/1L	1	1F/1L	1	1L/1M	1	1C/1F	1
NA17660	CYP1A2	1F/1L			1L/1L	1	1L/1L	1	1B/1G	1	1F/1F	1			0													1	1L/1L	1	1L/1L	1	1L/1W	1	1/1C	1
NA17673	CYP1A2	1A/1L;1C/1F			1A/1L	1	1B/1L	1	1A/1F	1	1/1F	1			0													1	1A/1L	1	1B/1L	1	1B/1L	1	1/1C	1
NA17679	CYP1A2	1F/1L			1F/1L	1	1F/1L	1	1B/1F	1	1F/1F	1			0													1	1F/1L	1	1F/1L	1	1L/1M	1	1C/1F	1
NA17702	CYP1A2	1A/1L;1C/1F			1A/1L	1	1B/1L	1	1A/1F	1	1/1F	1			0													1	1A/1L	1	1B/1L	1	1B/1L	1	1/1C	1
NA18484	CYP1A2	1/1			1A/1A	1	1B/1B	1	1B/1B	1	1/1	1			1	1A/1A	1	1B/1B	1	1B/1B	1	1/1	1					1	1A/1A	1	1B/1B	1	1B/1B	1	1/1	1
NA18509	CYP1A2	1A/1F			1A/1L	1	1B/1L	1	1B/1G	1	1/1F	1			1	1A/1L	1	1B/1L	1	1B/1G	1	1/1F	1					1	1A/1L	1	1B/1L	1	1A/1W	1	1/1	1
NA18518	CYP1A2	1A/1A			1A/1A	1	1B/1B	1	1B/1B	1	1/1	1			1	1A/1A	1	1B/1B	1	1B/1B	1	1/1	1					1	1A/1A	1	1B/1B	1	1B/1B	1	1/1+1	0
NA18519	CYP1A2	1/1			1A/1L	1	1B/1L	1	1A/1F	1	1/1F	1			1	1A/1L	1	1B/1L	1	1B/1L	1	1/1L	1					1	1A/1L	1	1B/1L	1	1B/1L	1	1/1	1
NA18524	CYP1A2	1A/1F			1A/1L	1	1B/1L	1	1B/1N	1	1/1F	1			1	1A/1L	1	1B/1L	1	1B/1N	1	1F/1	1					1	1A/1L	1	1B/1L	1	1B/1N	1	1/1F	1
NA18526	CYP1A2	1A/1L;1C/1F			1A/1L	1	1B/1L	1	1A/1F	1	1/1F	1			1	1A/1L	1	1B/1L	1	1B/1L	1	1/1L	1					1	1A/1L	1	1B/1L	1	1B/1L	1	1/1	1
NA18540	CYP1A2	1L/1L			1L/1L	1	1L/1L	1	1F/1F	1	1F/1F	1			1	1L/1L	1	1L/1L	1	1L/1L	1	1L/1L	1					1	1L/1L	1	1L/1L	1	1L/1L	1	1L/1L	1
NA18544	CYP1A2	1F/1L			1L/1L	1	1L/1L	1	1F/1F	1	1F/1F	1			1	1L/1L	1	1L/1L	1	1L/1N	1	1L/1F	1					1	1L/1L	1	1L/1L	1	1L/1N	1	1/1	1
NA18552	CYP1A2	1A/1A			1A/1A	1	1B/1B	1	1B/1B	1	1/1	1			1	1A/1A	1	1B/1B	1	1B/1B	1	1/1	1					1	1A/1A	1	1B/1B	1	1B/1B	1	1/1	1
NA18564	CYP1A2	1A/1A			1A/1A	1	1B/1B	1	1B/1B	1	1/1	1			1	1A/1A	1	1B/1B	1	1B/1B	1	1/1	1					1	1A/1A	1	1B/1B	1	1B/1B	1	1/1	1
NA18565	CYP1A2	1F/1F			1F/1L	1	1F/1L	1	17/1P	0	1F/1F	1			1	1F/1L	1	1F/1L	1	1M/1P	1	1F/1F	1					1	1F/1L	1	1F/1L	1	1M/1P	1	1/1	1
NA18855	CYP1A2	1/1			1A/1L	1	1B/1L	1	1A/1F	1	1/1F	1			1	1A/1L	1	1B/1L	1	1B/1L	1	1/1C	1					1	1A/1L	1	1B/1L	1	1B/1L	1	1/1C	1
NA18861	CYP1A2	1A/1L;1C/1F			1A*/1L	1	1B*/1L	1	1B/21	0	1/1F	1			1	1A*/1L	1	1B*/1L	1	1B/1L	1	1/1L	1					1	1A/1L*	1	1B*/1L	1	1B/1L	1	1/1	1
NA18868	CYP1A2	1A/1L;1C/1F			1A/1L	1	1B/1L	1	1A/1F	1	1/1F	1			1	1A/1L	1	1B/1L	1	1B/1L	1	1/1C	1					1	1A/1L	1	1B/1L	1	1B/1L	1	1/1	1
NA18942	CYP1A2	1A/1F	1L/14	1	1L/14*	1	1L/14*	1	14/1J	1	1/14	1			1	1L/14*	1	1L/14*	1	14/1W	1	1/14	1					1	1L/14*	1	1L/14*	1	14/1W	1	1/14	1
NA18952	CYP1A2	1A/1L;1C/1F			1A/1L	1	1B/1L	1	1A/1F	1	1/1F	1			1	1A/1L	1	1B/1L	1	1B/1L	1	1/1C	1					1	1A/1L	1	1B/1L	1	1B/1L	1	1/1	1
NA18959	CYP1A2	1A/1A			1A/1A	1	1B/1B	1	1B/1B	1	1/1	1			1	1A/1A	1	1B/1B	1	1B/1B	1	1/1	1					1	1A/1A	1	1B/1B	1	1B/1B	1	1/1	1
NA18966	CYP1A2	1A/1F			1A/1L	1	1B/1L	1	1B/1G	1	1/1F	1			1	1A/1L	1	1B/1L	1	1A/1W	1	1/1F	1					1	1A/1L	1	1B/1L	1	1A/1W	1	1/1+1	0
NA18973	CYP1A2	1F/1L			1L/1L	1	1L/1L	1	1F/1F	1	1F/1F	1			1	1L/1L	1	1L/1L	1	1L/1N	1	1L/1F	1					1	1L/1L	1	1L/1L	1	1L/1N	1	1/DEL	0
NA18980	CYP1A2	1A/1L;1C/1F			1A/1L	1	1B/1L	1	1A/1F	1	1/1F	1			1	1A/1L	1	1B/1L	1	1B/1L	1	1/1C	1					1	1A/1L	1	1B/1L	1	1B/1L	1	1/1	1
NA18992	CYP1A2	1A/1A			1A/1A	1	1B/1B	1	1B/1B	1	1/1	1			1	1A/1A	1	1B/1B	1	1B/1B	1	1/1	1					1	1A/1A	1	1B/1B	1	1B/1B	1	1/1	1
NA19003	CYP1A2	1A/1F			1A/1L	1	1B/1L	1	1A/1F	1	1/1F	1			1	1A/1L	1	1B/1L	1	1B/1N	1	1/1F	1					1	1A/1L	1	1B/1L	1	1B/1N	1	1/1	1
NA19007	CYP1A2	1A/1L;1C/1F			1A/1L	1	1B/1L	1	1A/1F	1	1/1F	1			1	1A/1L	1	1B/1L	1	1B/1L	1	1/1C	1					1	1A/1L	1	1B/1L	1	1B/1L	1	1/1	1
NA19095	CYP1A2	1/1			1A*/1L	1	1B*/1L	1	1B/21	0	1/1F	1			1	1A*/1L	1	1B*/1L	1	1B/1L	1	1/1L	1					1	1A/1L*	1	1B/1L	1	1B/1L	1	1/1	1
NA19109	CYP1A2	1A/1F			1A/1L	1	1B/1L	1	1B/1N	1	1/1F	1			1	1A/1L	1	1B/1L	1	1B/1N	1	1/1F	1					1	1A/1L	1	1B/1L	1	1B/1N	1	1/1F	1
NA19122	CYP1A2	1A/1L;1C/1F			1A/1L	1	1B/1L	1	1A/1F	1	1/1F	1			1	1A/1L	1	1B/1L	1	1B/1L	1	1/1L	1					1	1A/1L	1	1B/1L	1	1B/1L	1	[1L,1C,1F]/1	1
NA19143	CYP1A2	1A/1F			1A/1L	1	1B/1L	1	1B/1G	1	1/1F	1			1	1A/1L	1	1B/1L	1	1A/1W	1	1/1	1					1	1A/1L	1	1B/1L	1	1A/1W	1	1/1	1
NA19147	CYP1A2	1A/1A			1A/1A	1	1B/1B	1	1B/1B	1	1/1	1			1	1A/1A	1	1B/1B	1	1B/1B	1	1/1	1					1	1A/1A	1	1B/1B	1	1B/1B	1	1/1+1	0
NA19174	CYP1A2	1A/1L;1C/1F			1A/1L	1	1B/1L	1	1A/1F	1	1/1F	1			1	1A/1L	1	1B/1L	1	1B/1L	1	1/1L	1					1	1A/1L	1	1B/1L	1	1B/1L	1	1/1L	1
NA19176	CYP1A2	1/1			1A/1A	1	1B/1B	1	1B/1B	1	1/1	1			1	1A/1A	1	1B/1B	1	1B/1B	1	1/1	1					1	1A/1A	1	1B/1B	1	1B/1B	1	1/1	1
NA19178	CYP1A2	1L/1L			1L/1L	1	1L/1L	1	1F/1F	1	1F/1F	1			1	1L/1L	1	1L/1L	1	1L/1L	1	1L/1L	1					1	1L/1L	1	1L/1L	1	1L/1L	1	1L/1L	1
NA19207	CYP1A2	1A/1F			1A/1L	1	1B/1L	1	1B/1G	1	1/1F	1			1	1A/1L	1	1B/1L	1	1A/1W	1	1/1	1					1	1A/1L	1	1B/1L	1	1A/1W	1	1/1	1
NA19213	CYP1A2	1A/1A			1A/1A	1	1B/1B	1	1B/1B	1	1/1	1			1	1A/1A	1	1B/1B	1	1B/1B	1	1/1	1					1	1A/1A	1	1B/1B	1	1B/1B	1	1/1	1
NA19226	CYP1A2	1A/1A			1A/1A	1	1B/1B	1	1B/1B	1	1/1	1			1	1A/1A	1	1B/1B	1	1B/1B	1	1/1	1					1	1A/1A	1	1B/1B	1	1B/1B	1	1/1	1
NA19239	CYP1A2	1A/1L;1C/1F			1A/1L	1	1B/1L	1	1A/1F	1	1/1F	1			1	1A/1L	1	1B/1L	1	1B/1L	1	1/1L	1					1	1L/1L	1	1L/1L	1	1B/1L	1	1/1+1	0
NA19789	CYP1A2	1A/1L;1C/1F			1A/1L	1	1B/1L	1	1A/1F	1	1/1F	1			1	1A/1L	1	1B/1L	1	1B/1L	1	1/1C	1					1	1A/1L	1	1B/1L	1	1B/1L	1	1/1	1
NA19819	CYP1A2	1F/1L			1F/1L	1	1F/1L	1	1F/1M	1	1F/1F	1			1	1F/1L	1	1F/1L	1	1L/1M	1	1C/1F	1					1	1F/1L	1	1F/1L	1	1L/1M	1	1/1	1
NA19908	CYP1A2	1L/1L			1L/1L	1	1L/1L	1	1F/1F	1	1F/1F	1			1	1L/1L	1	1L/1L	1	1L/1L	1	1L/1L	1					1	1L/1L	1	1L/1L	1	1L/1L	1	1/1	1
NA19920	CYP1A2	1A/1A			1A/1A	1	1B/1B	1	1B/1B	1	1/1	1			1	1A/1A	1	1B/1B	1	1B/1B	1	1/1	1					1	1A/1A	1	1B/1B	1	1B/1B	1	1/1	1
NA20296	CYP1A2	1L/1L			1L/1L	1	1L/1L	1	1F/1F	1	1F/1F	1			1	1L/1L	1	1L/1L	1	1L/1L	1	1L/1L	1					1	1L/1L	1	1L/1L	1	1L/1L	1	1/1	1
NA20509	CYP1A2	1A/1F			1A/1F	1	1B/1F	1	1A/1F	1	1/1F	1			1	1A/1F	1	1B/1F	1	1B/1M	1	1/1F	1					1	1A/1F	1	1B/1F	1	1B/1M	1	1/1	1
NA23246	CYP1A2	1A/1L;1C/1F			1A/1L	1	1B/1L	1	1A/1F	1	1/1F	1			0													1	1A/1L	1	1B/1L	1	1B/1L	1	1/1L	1
NA23275	CYP1A2	1A/1A			1A/1A	1	1B/1B	1	1B/1B	1	1/1	1			0													1	1A/1A	1	1B/1B	1	1B/1B	1	1/1	1
NA23313	CYP1A2	1F/1F			1F/1F	1	1F/1F	1	1M/1M	1	1F/1F	1			0													0
NA23348	CYP1A2	1A/1F			1A/1F	1	1B/1F	1	1A/1F	1	1/1F	1			0													1	1A/1F	1	1B/1F	1	1B/1M	1	1/1F	1
NA23873	CYP1A2	1F/1F			1F/1F	1	1F/1F	1	1M/1M	1	1F/1F	1			0													0
NA23874	CYP1A2	1A/1F			1A/1F	1	1B/1F	1	1B/1F	1	1/1F	1			0													1	1A/1F	1	1B/1F	1	1B/1M	1	1F/DEL	0
NA23877	CYP1A2	1A/1F			1A/1F	1	1B/1F	1	1B/1M	1	1/1F	1			0													0
NA24008	CYP1A2	1F/1L			1F/1L	1	1F/1L	1	1B/1M	1	1F/1F	1			0													1	1F/1L	1	1F/1L	1	1L/1M	1	[1C,1F]/1F	1
NA24009	CYP1A2	1A/1A			1A/1A	1	1B/1B	1	1B/1B	1	1/1	1			0													0
NA24217	CYP1A2	1A/1F			1A/1F	1	1B/1F	1	1A/1B	1	1/1F	1			0													0
HG00276	CYP2A13	1A/1A			1/1	1	1/1	1			1/1	1			1	1/1	1	1/1	1			1/1	1					1	1/1	1	1/1	1			1/1	1
HG00436	CYP2A13	1A/1A			1/1	1	1/1	1			1/1	1			1	1/1	1	1/1	1			1/1	1					0
HG00589	CYP2A13	1A/1A			1/1	1	1/1	1			1/1	1			1	1/1	1	1/1	1			1/1	1					1	1/1	1	1/1	1			1/1	1
HG01190	CYP2A13	1A/1A			1/1	1	1/1	1			1/1	1			1	1/1	1	1/1	1			1/1	1					1	1/1	1	1/1	1			1/1+1	0
NA06991	CYP2A13	1A/1A			1/1	1	1/1	1			1/1	1			1	1/1	1	1/1	1			1/1	1					1	1/1	1	1/1	1			1/1+1+1	0
NA07019	CYP2A13	1A/1A			1/1	1	1/1	1			1/1	1			1	1/1	1	1/1	1			1/1	1					1	1/1	1	1/1	1			1/1	1
NA07029	CYP2A13	1A/1A			1/1	1	1/1	1			1/1	1			1	1/1	1	1/1	1			1/1	1					1	1/1	1	1/1	1			1/1	1
NA07055	CYP2A13	1A/1A			1/1	1	1/1	1			1/1	1			1	1/1	1	1/1	1			1/1	1					1	1/1	1	1/1	1			1/1+1	0
NA07056	CYP2A13	1A/1A			1/1	1	1/1	1			1/1	1			1	1/1	1	1/1	1			1/1	1					1	1/1	1	1/1	1			1/1	1
NA07348	CYP2A13	1A/1A			1/1	1	1/1	1			1/1	1			1	1/1	1	1/1	1			1/1	1					1	1/1	1	1/1	1			1/1+1	0
NA07357	CYP2A13	1A/1A			1/1	1	1/1	1			1/1	1			1	1/1	1	1/1	1			1/1	1					1	1/1	1	1/1	1			1/1	1
NA07439	CYP2A13	1A/1A			1/1	1	1/1	1			1/1	1			0													1	1/1	1	1/1	1			1/1	1
NA10831	CYP2A13	1A/1A			1/1	1	1/1	1			1/1	1			1	1/1	1	1/1	1			1/1	1					1	1/1	1	1/1	1			1/1+1	0
NA10847	CYP2A13	1A/1A			1/1	1	1/1	1			1/1	1			1	1/1	1	1/1	1			1/1	1					1	1/1	1	1/1	1			1/1	1
NA10851	CYP2A13	1A/1A			1/1	1	1/1	1			1/1	1			1	1/1	1	1/1	1			1/1	1					1	1/1	1	1/1	1			1/1+1	0
NA10854	CYP2A13	1A/2B	1/1	2	1/1	1	1/1	1			1/1	1			1	1/1	1	1/1	1			1/1	1					1	1/1	1	1/1	1			1/1+1	0
NA11832	CYP2A13	1A/1A			1/1	1	1/1	1			1/1	1			1	1/1	1	1/1	1			1/1	1					1	1/1	1	1/1	1			1/1	1
NA11839	CYP2A13	1A/2B	1/1	2	1/1	1	1/1	1			1/1	1			1	1/1	1	1/1	1			1/1	1					1	1/1	1	1/1	1			1/1	1
NA11993	CYP2A13	1A/1A			1/1	1	1/1	1			1/1	1			1	1/1	1	1/1	1			1/1	1					1	1/1	1	1/1	1			1/1+1	0
NA12003	CYP2A13	1A/1A			1/1	1	1/1	1			1/1	1			1	1/1	1	1/1	1			1/1	1					1	1/1	1	1/1	1			1/1	1
NA12006	CYP2A13	1A/3	1/1	2	1/1	1	1/1	1			1/1	1			1	1/1	1	1/1	1			1/1	1					1	1/1	1	1/1	1			1/1	1
NA12145	CYP2A13	1A/1A			1/1	1	1/1	1			1/1	1			1	1/1	1	1/1	1			1/1	1					1	1/1	1	1/1	1			1/1+1	0
NA12156	CYP2A13	1A/1A			1/1	1	1/1	1			1/1	1			1	1/1	1	1/1	1			1/1	1					1	1/1	1	1/1	1			1/1+1	0
NA12236	CYP2A13	1A/1A			1/1	1	1/1	1			1/1	1			0													1	1/1	1	1/1	1			1/1+1	0
NA12717	CYP2A13	1A/1A			1/1	1	1/1	1			1/1	1			1	1/1	1	1/1	1			1/1	1					1	1/1	1	1/1	1			1/1	1
NA12813	CYP2A13	1A/1A			1/1	1	1/1	1			1/1	1			1	1/1	1	1/1	1			1/1	1					1	1/1	1	1/1	1			1/1+1	0
NA12873	CYP2A13	1A/1A			1/1	1	1/1	1			1/1	1			1	1/1	1	1/1	1			1/1+1	0					1	1/1	1	1/1	1			1/1	1
NA12878	CYP2A13	1A/1A			1/1	1	1/1	1			1/1	1			0													0
NA15245	CYP2A13	1A/1A			1/1	1	1/1	1			1/1	1			0													1	1/1	1	1/1	1			1/1	1
NA17074	CYP2A13	1A/3	1/1	2	1/1	1	1/1	1			1/1	1			0													1	1/1	1	1/1	1			1/1+1	0
NA17204	CYP2A13	1A/1A			1/1	1	1/1	1			1/1	1			0													1	1/1	1	1/1	1			1/1	1
NA17227	CYP2A13	1A/1A			1/1	1	1/1	1			1/1	1			0													1	1/1	1	1/1	1			1/1	1
NA17234	CYP2A13	1A/1A			1/1	1	1/1	1			1/1	1			0													1	1/1	1	1/1	1			1/1+1	0
NA17235	CYP2A13	1A/1A			1/1	1	1/1	1			1/1	1			0													1	1/1	1	1/1	1			1/1	1
NA17244	CYP2A13	1A/2B			1/2	1	1/2	1			1/2	1			0													1	1/2	1	1/2	1			1/2	1
NA17448	CYP2A13	1A/1A			1/1	1	1/1	1			1/1	1			0													1	1/1	1	1/1	1			1/1	1
NA17454	CYP2A13	1A/1A			1/1	1	1/1	1			1/1	1			0													1	1/1	1	1/1	1			1/1	1
NA17641	CYP2A13	1A/3	1/1	2	1/1	1	1/1	1			1/1	1			0													1	1/1	1	1/1	1			1/1	1
NA17642	CYP2A13	1A/1A			1/1	1	1/1	1			1/1	1			0													1	1/1	1	1/1	1			1/1	1
NA17657	CYP2A13	1A/1A			1/1	1	1/1	1			1/1	1			0													1	1/1	1	1/1	1			1/1	1
NA17658	CYP2A13	3/3	1/1	2	1/1	1	1/1	1			1/1	1			0													1	1/1	1	1/1	1			1/1	1
NA17660	CYP2A13	1A/1A			1/1	1	1/1	1			1/1	1			0													1	1/1	1	1/1	1			1/1	1
NA17673	CYP2A13	1A/3	1/1	2	1/1	1	1/1	1			1/1	1			0													1	1/1	1	1/1	1			1/1	1
NA17679	CYP2A13	1A/3	1/1	2	1/1	1	1/1	1			1/1	1			0													1	1/1	1	1/1	1			1/1	1
NA17702	CYP2A13	1A/3	1/1	2	1/1	1	1/1	1			1/1	1			0													1	1/1	1	1/1	1			1/1	1
NA18484	CYP2A13	1A/1A			1/1	1	1/1	1			1/1	1			1	1/1	1	1/1	1			1/1+1	0					1	1/1	1	1/1	1			1/1+1	0
NA18509	CYP2A13	2B/2B			2/2	1	2/2	1			2/2	1			1	2/2	1	2/2	1			2/2	1					1	2/2	1	2/2	1			2/2+2	0
NA18518	CYP2A13	1A/1A	1/2	1	1/2	1	1/2	1			1/2	1			1	1/2	1	1/2	1			1/2	1					1	1/2	1	1/2	1			1/2	1
NA18519	CYP2A13	1A/2B	2/2	1	2/2	1	2/2	1			2/2	1			1	2/2	1	2/2	1			2/2	1					1	2/2	1	2/2	1			2/2	1
NA18524	CYP2A13	1A/2B			1/2	1	1/2	1			1/2	1			1	1/2	1	1/2	1			2/1	1					1	1/2	1	1/2	1			1/2	1
NA18526	CYP2A13	1A/1A			1/1	1	1/1	1			1/1	1			1	1/1	1	1/1	1			1/1	1					1	1/1	1	1/1	1			1/1	1
NA18540	CYP2A13	1A/1A			1/1	1	1/1	1			1/1	1			1	1/1	1	1/1	1			1/1+1	0					1	1/1	1	1/1	1			1/1	1
NA18544	CYP2A13	1A/1A			1/1	1	1/1	1			1/1	1			1	1/1	1	1/1	1			1/1	1					1	1/1	1	1/1	1			1/1	1
NA18552	CYP2A13	1A/2B			1/2	1	1/2	1			1/2	1			1	1/2	1	1/2	1			1/2	1					1	1/2	1	1/2	1			1/2	1
NA18564	CYP2A13	1A/2B			1/2	1	1/2	1			1/2	1			1	1/2	1	1/2	1			1/2	1					1	1/2	1	1/2	1			1/2	1
NA18565	CYP2A13	1A/1A			1/1	1	1/1	1			1/1	1			1	1/1	1	1/1	1			1/1	1					1	1/1	1	1/1	1			1/1	1
NA18855	CYP2A13	1A/1A			1/1	1	1/1	1			1/1	1			1	1/1	1	1/1	1			1/1	1					1	1/1	1	1/1	1			1/1	1
NA18861	CYP2A13	1A/1H	1/2	1	1/2	1	1/2	1			1/2	1			1	1/2	1	1/2	1			1/2	1					1	1/2	1	1/2	1			1/2	1
NA18868	CYP2A13	1A/2B	1/1	2	1/1	1	1/1	1			1/1	1			1	1/1	1	1/1	1			1/1	1					1	1/1	1	1/1	1			1/1	1
NA18942	CYP2A13	1A/1A			1/1	1	1/1	1			1/1	1			1	1/1	1	1/1	1			1/1+1	0					1	1/1	1	1/1	1			1/1	1
NA18952	CYP2A13	1A/1A			1/1	1	1/1	1			1/1	1			1	1/1	1	1/1	1			1/1	1					1	1/1	1	1/1	1			1/1	1
NA18959	CYP2A13	1A/1A			1/1	1	1/1	1			1/1	1			1	1/1	1	1/1	1			1/1	1					1	1/1	1	1/1	1			1/1	1
NA18966	CYP2A13	1A/1A			1/1	1	1/1	1			1/1	1			1	1/1	1	1/1	1			1/1	1					1	1/1	1	1/1	1			1/1+1	0
NA18973	CYP2A13	1A/1A			1/1	1	1/1	1			1/1	1			1	1/1	1	1/1	1			1/1	1					1	1/1	1	1/1	1			1/DEL	0
NA18980	CYP2A13	1A/1A			1/1	1	1/1	1			1/1	1			1	1/1	1	1/1	1			1/1	1					1	1/1	1	1/1	1			1/1	1
NA18992	CYP2A13	1A/1A			1/1	1	1/1	1			1/1	1			1	1/1	1	1/1	1			1/1	1					1	1/1	1	1/1	1			1/1	1
NA19003	CYP2A13	1A/1A			1/1	1	1/1	1			1/1	1			1	1/1	1	1/1	1			1/1	1					1	1/1	1	1/1	1			1/1	1
NA19007	CYP2A13	1A/1A			1/1	1	1/1	1			1/1	1			1	1/1	1	1/1	1			1/1	1					1	1/1	1	1/1	1			1/1	1
NA19095	CYP2A13	1H/2B	1/1	2	1/1	1	1/1	1			1/1	1			1	1/1	1	1/1	1			1/1	1					1	1/1	1	1/1	1			1/1	1
NA19109	CYP2A13	1A/1A			1/1	1	1/1	1			1/1	1			1	1/1	1	1/1	1			1/1	1					1	1/1	1	1/1	1			1/1	1
NA19122	CYP2A13	1A/2B	1/1	2	1/1*	1	1/1*	1			1/1	1			1	1/1*	1	1/1*	1			1/1	1					1	1/1*	1	1/1*	1			1/1+1	0
NA19143	CYP2A13	1A/2B			1/2	1	1/2	1			1/2	1			1	1/2	1	1/2	1			1/2	1					1	1/2	1	1/2	1			1/2	1
NA19147	CYP2A13	1A/1H			1/1	1	1/1	1			1/1	1			1	1/1	1	1/1	1			1/1	1					1	1/1	1	1/1	1			1/1+1	0
NA19174	CYP2A13	1H/2B			1/2	1	1/2	1			1/2	1			1	1/2	1	1/2	1			1/2	1					1	1/2	1	1/2	1			1/2	1
NA19176	CYP2A13	1A/1H			1/1	1	1/1	1			1/1	1			1	1/1	1	1/1	1			1/1	1					1	1/1	1	1/1	1			1/1+1	0
NA19178	CYP2A13	1A/2B	2/8	1	2/8	1	2/8	1			2/8	1			1	2/8	1	2/8	1			1/2	0					1	2/8	1	2/8	1			1/2	0
NA19207	CYP2A13	1A/1A			1/1	1	1/1	1			1/1	1			1	1/1	1	1/1	1			1/1	1					1	1/1	1	1/1	1			1/1	1
NA19213	CYP2A13	1A/2B			1/2	1	1/2	1			1/2	1			1	1/2	1	1/2	1			1/2	1					1	1/2	1	1/2	1			1/2	1
NA19226	CYP2A13	1A/1A	1/2	1	1/2	1	1/2	1			1/2	1			1	1/2	1	1/2	1			1/2	1					1	1/2	1	1/2	1			1/2	1
NA19239	CYP2A13	1A/2B	2/2	1	2/2	1	2/2	1			2/2	1			1	2/2	1	2/2	1			2/2	1					1	2/2	1	2/2	1			2/2+2	0
NA19789	CYP2A13	1A/1A			1/1	1	1/1	1			1/1	1			1	1/1	1	1/1	1			1/1+1	0					1	1/1	1	1/1	1			1/1	1
NA19819	CYP2A13	1A/1A			1/1	1	1/1	1			1/1	1			1	1/1	1	1/1	1			1/1	1					1	1/1	1	1/1	1			1/1	1
NA19908	CYP2A13	1A/1A			1/1	1	1/1	1			1/1	1			1	1/1	1	1/1	1			1/1	1					1	1/1	1	1/1	1			1/1+1	0
NA19920	CYP2A13	1A/1A	1/2	1	1/2	1	1/2	1			1/2	1			1	1/2	1	1/2	1			1/2	1					1	1/2	1	1/2	1			1/2	1
NA20296	CYP2A13	1A/1A			1/1	1	1/1	1			1/1	1			1	1/1	1	1/1	1			1/1	1					1	1/1	1	1/1	1			1/1	1
NA20509	CYP2A13	1A/1A			1/1	1	1/1	1			1/1	1			1	1/1	1	1/1	1			1/1+1	0					1	1/1	1	1/1	1			1/1	1
NA23246	CYP2A13	1A/1A			1/1	1	1/1	1			1/1	1			0													1	1/1	1	1/1	1			1/1	1
NA23275	CYP2A13	1A/2B			1/2	1	1/2	1			1/2	1			0													1	1/2	1	1/2	1			1/2	1
NA23313	CYP2A13	1A/1A			1/1	1	1/1	1			1/1	1			0													0
NA23348	CYP2A13	1A/2B			1/2	1	1/2	1			1/2	1			0													1	1/2	1	1/2	1			1/2	1
NA23873	CYP2A13	1A/1A			1/1	1	1/1	1			1/1	1			0													0
NA23874	CYP2A13	1A/1A			1/1	1	1/1	1			1/1	1			0													1	1/1	1	1/1	1			1/1	1
NA23877	CYP2A13	1A/1A			1/1	1	1/1	1			1/1	1			0													0
NA24008	CYP2A13	1A/3	1/1	2	1/1	1	1/1	1			1/1	1			0													1	1/1	1	1/1	1			1/1+1	0
NA24009	CYP2A13	1A/1H			1/1	1	1/1	1			1/1	1			0													0
NA24217	CYP2A13	1A/1A			1/1	1	1/1	1			1/1	1			0													0
HG00276	CYP2A6	1/1			1/1	1	1/1	1	1/1x128	0	1/1	1			1	1/1	1	1/1	1	1B/1	1	1/1	1					1	1/1	1	4/12	0	1B/1	1	18/18	0
HG00436	CYP2A6	4/9			4/9	1	4/4	0	9/9x65	0	9/9	0			1	4/9*	1	4/4	0	4/9	1	1+S6/4	0					0
HG00589	CYP2A6	1/1			1/1	1	1/1	1	1/1x107	0	1/1	1			1	1/1	1	1/1	1	1B/1	1	1/1	1					1	1/1	1	1/1	1	4/1	0	18/18	0
HG01190	CYP2A6	1/1			1/1	1	1/1	1	1/1x119	0	1/1	1			1	1/1	1	1/1	1	1B/1	1	1/1	1					1	1/1	1	4/12	0	1/1	1	18/18+8	0
NA06991	CYP2A6	1/1			1/1	1	1/1	1	1x2/18x123	0	1/1	1			1	1/1	1	1/1	1	1/1	1	1/1	1					1	1/1+1	0	1/12	0	1/1	1	1+S6/1+1	0
NA06993	CYP2A6	1/1			1/1	1	1/1	1	1/1x115	0	1/1	1			0													0
NA07000	CYP2A6	1/1			1/1	1	1/1	1	22x3/1x118	0	1/1	1			1	1/1	1	1/1	1	1B/1	1	1/1+S2	0					1	1/1	1	1/1	1	1/1	1	18/18	0
NA07019	CYP2A6	1/1			1/1	1	1/1	1	1/1x131	0	1/1	1			1	1/1	1	1/1	1	1/1	1	1/1	1					1	1/1+1	0	1/12	0	1/1	1	1/1	1
NA07029	CYP2A6	1/1			1/1	1	1/1	1	1/1x131	0	1/1	1			1	1/1	1	1/1	1	1/1	1	1/1	1					1	1/1	1	1/1	1	4/1	0	1/1	1
NA07048	CYP2A6	1/1	1/21	1	1/21	1	1/21	1	1/1x124	0	1/21	1			0													0
NA07055	CYP2A6	1/1			1/1	1	1/1	1	1/1x123	0	1/1	1			1	1/1	1	1/1	1	1B/1	1	1/1	1					1	1/1	1	4/12	0	1B/1	1	1/1	1
NA07056	CYP2A6	1/1			1/1	1	1/1	1	1/1x127	0	1/1	1			1	1/1	1	1/1	1	1/1	1	1/1	1					1	1/1+1	0	1/12	0	1/1	1	18/18+8	0
NA07348	CYP2A6	1/1			1/1	1	1/1	1	1/1x119	0	1/1	1			1	1/1	1	1/1	1	1B/1	1	1/1	1					1	1/1	1	1/41	0	4/1	0	1/1	1
NA07357	CYP2A6	1/1			1/1	1	1/1	1	1/1x123	0	1/1	1			1	1/1	1	1/1	1	1/1	1	1/1	1					1	1/1	1	1/12	0	1/1	1	18/18	0
NA07439	CYP2A6	1/1			1/1	1	1/1	1	1/1x117	0	1/1	1			0													1	1/1	1	1/1	1	1/1	1	1/1+1	0
NA10831	CYP2A6	1/2			1/2	1	1/2	1	1/1x123	0	1/2	1			1	1/2	1	1/2	1	1B/2	1	1/2	1					1	1/2+2	0	1/12;2/12	0	1B/2	1	1+S6/1+1	0
NA10838	CYP2A6	1/1			1/1	1	1/1	1	1/22	0	1/1	1			0													0
NA10846	CYP2A6	1/1			1/1	1	1/1	1	1/1x121	0	1/1	1			0													0
NA10847	CYP2A6	1/1			1/1	1	1/1	1	1/1x115	0	1/1	1			1	1/1	1	1/1	1	1B/1B	1	1/1	1					1	1/1	1	1/1	1	1B/1B	1	18/18	0
NA10851	CYP2A6	1/2			1/2	1	1/2	1	2x2/1x124	0	1/2	1			1	1/2	1	1/2	1	1/2	1	1+S6/2	0					1	1/2	1	1/2	1	1/2	1	18/[2,18]	0
NA10854	CYP2A6	1/1			1/1	1	1/1	1	1/1x122	0	1/1	1			1	1/1	1	1/1	1	1/1	1	1/1	1					1	1/1	1	1/1	1	1/1	1	1/1	1
NA10855	CYP2A6	1/2			1/2	1	1/2	1	2x2/1x115	0	1/2	1			0													0
NA10856	CYP2A6	1/1			1/1	1	1/1	1	1/1x127	0	1/1	1			0													0
NA10859	CYP2A6	1/2			1/2	1	1/2	1	1/1x117	0	1/2	1			0													0
NA10865	CYP2A6	1/9			1/9	1	1/9	1	1/1x121	0	1/9	1			0													0
NA11832	CYP2A6	1/2			1/2	1	1/2	1	1/1x123	0	1/2	1			1	1/2	1	1/2	1	1/2	1	1/2	1					1	1/2+2	0	2/12	0	1/2	1	18/[2,18]	0
NA11839	CYP2A6	1/9			1/9	1	1/9	1	9x2/1x122	0	1/9	1			1	1/9	1	1/9	1	1/9	1	1/9	1					1	1/9	1	1/9	1	1/9	1	9/1	1
NA11881	CYP2A6	1/1			1/1	1	1/1	1	1/1x118	0	1/1	1			0													0
NA11993	CYP2A6	9/17			9/17	1	9/17	1	18/35	0	9/17	1			1	9/17	1	9/17	1	17/35	0	9/17	1					1	9/17	1	9/17	1	17/9	1	9/17	1
NA12003	CYP2A6	1/1			1/1	1	1/1	1	1/1x129	0	1/1	1			1	1/1	1	1/1	1	1/1	1	1/1	1					1	1/12	0	1/12	0	1/1	1	18/18	0
NA12006	CYP2A6	1/1			1/1	1	1/1	1	1x2/18x122	0	1/1	1			1	1/1	1	1/1	1	1B/1	1	1/1	1					1	1/1	1	1/1	1	1/1	1	18/18	0
NA12145	CYP2A6	1/1			1/1	1	1/1	1	1/1x133	0	1/1	1			1	1/1	1	1/1	1	1B/1	1	1/1	1					1	1/1+1	0	1/12	0	4/1	0	1/1+1	0
NA12156	CYP2A6	1/1			1/1	1	1/1	1	1/1x122	0	1/1	1			1	1/1	1	1/1	1	1B/1	1	1/1	1					1	1/1+1	0	1/12	0	1B/1	1	18/18+8	0
NA12236	CYP2A6	1/1			1/1	1	1/1	1	1/1x124	0	1/1	1			0													1	1/1	1	1/1	1	1B/1	1	1/1+1	0
NA12336	CYP2A6	2/1+1			1+1/2	1	1+1/2	1	1/2x174	0	1/2	0			0													0
NA12375	CYP2A6	1/1			1/1	1	1/1	1	1/1x119	0	1/1	1			0													0
NA12717	CYP2A6	1/1			1/1	1	1/1	1	1x3/18x111	0	1/1	1			1	1/1	1	1/1	1	1B/1	1	1/1	1					1	1/1	1	1/1	1	1B/1	1	18/18	0
NA12753	CYP2A6	1/1			1/1	1	1/1	1	1/1x119	0	1/1	1			0													0
NA12813	CYP2A6	1/1			1/1	1	1/1	1	1x3/18x111	0	1/1	1			1	1/1	1	1/1	1	1B/1	1	1/1	1					1	1/1+1	0	1/12	0	1B/1	1	18/18+8	0
NA12815	CYP2A6	1/1	1/12	1	1/12	1	1/12	1	1/1x111	0	1/1	0			0													0
NA12873	CYP2A6	1/9			1/9	1	1/9	1	9x3/18x120	0	1/9	1			1	1/9	1	1/9	1	1B/9	1	9/1	1					1	9/12	0	1/12	0	1B/9	1	9/18	0
NA12878	CYP2A6	1/1			1/1	1	1/1	1	1/1x131	0	1/1	1			0													0
NA12892	CYP2A6	1/1			1/1	1	1/1	1	1/1x122	0	1/1	1			0													0
NA15245	CYP2A6	1/1			1/1	1	1/1	1	1/1x117	0	1/1	1			0													1	1/1	1	1/1	1	1/1	1	1/1	1
NA17012	CYP2A6	1/1			1/1	1	1/1	1	1/1x116	0	1/1	1			0													0
NA17061	CYP2A6	17/17			17/17	1	17/17	1	17/17x117	0	17/17	1			0													0
NA17074	CYP2A6	1/1			1/1	1	1/1	1	1/1x116	0	1/1	1			0													1	1/1	1	1/1	1	1B/1	1	1/1+1	0
NA17102	CYP2A6	1/1			1/1	1	1/1	1	1/1x118	0	1/1	1			0													1	1/1	1	1/12	0	1/1	1	1/1+1	0
NA17204	CYP2A6	1/1			1/1	1	1/1	1	1/1x125	0	1/1	1			0													1	1/1+1	0	1+41/16	0	1B/1	1	1/1	1
NA17227	CYP2A6	9/14			9/14	1	9/14	1	14/1x113	0	9/14	1			0													1	9/14	1	9/14	1	14/9	1	9/14	1
NA17234	CYP2A6	1/9			1/9	1	1/9	1	9x2/1x121	0	1/9	1			0													1	1+1/9	0	12/16	0	1B/9	1	1+S6/1+1	0
NA17235	CYP2A6	1/1			1/1	1	1/1	1	1/1x105	0	1/1	1			0													1	1/1	1	1/1	1	1B/1B	1	1/1	1
NA17244	CYP2A6	1/1			1/1	1	1/1	1	1/1x111	0	1/1	1			0													1	1/1+1	0	1/12	0	1B/1	1	1+S6/1+1	0
NA17288	CYP2A6	1/1			1/1	1	1/1	1	1/1x117	0	1/1	1			0													0
NA17290	CYP2A6	1/1			1/1	1	1/1	1	1/1x125	0	1/1	1			0													0
NA17448	CYP2A6	1/1			1/1	1	1/1	1	1/1x118	0	1/1	1			0													1	1/1	1	1/1	1	1B/1B	1	1/1	1
NA17454	CYP2A6	1/9			1/9	1	1/9	1	9x2/1x116	0	1/9	1			0													1	1/9	1	1/9	1	1/9	1	1/9	1
NA17641	CYP2A6	1/1			1/1	1	1/1	1	1/1x114	0	1/1	1			0													1	1/1	1	1/1	1	1B/1B	1	1/1+S2	0
NA17642	CYP2A6	1/1			1/1	1	1/1	1	1x3/18x113	0	1/1	1			0													1	1/35	0	1/1	1	1/35	0	1/35	0
NA17657	CYP2A6	1/1			1/1	1	1/1	1	1/1x119	0	1/1	1			0													1	1/1	1	1/1	1	1/1	1	1/1+1	0
NA17658	CYP2A6	1/1(35)	1/1	2	1/1	1	1/1	1	1/1x116	0	1/1	1			0													1	1/1	1	1/1	1	1/1	1	1/1	1
NA17660	CYP2A6	1/9			1/9	1	1/9	1	1/1x117	0	1/9	1			0													1	1/9	1	4/12	0	1/9	1	1/9	1
NA17673	CYP2A6	1/9			1/9	1	1/9	1	1x3/18x119	0	1/9	1			0													1	1/9	1	1/12	0	1/9	1	1/9	1
NA17679	CYP2A6	9/14			9/14	1	9/14	1	9x4/18x115	0	9/14	1			0													1	9/14	1	9/14	1	14/9	1	9/14	1
NA17702	CYP2A6	1/9			1/9	1	1/9	1	9x2/1x116	0	1/9	1			0													1	1/9	1	1/9	1	1B/9	1	1/9	1
NA18484	CYP2A6	1/9			1/9	1	1/9	1	9x3/18x118	0	1/9	1			1	1/9	1	1/9	1	1/9	1	9/1	1					1	1/9+9	0	9/12	0	1/9	1	9/1	1
NA18509	CYP2A6	1/17			1/17	1	1/17	1	17/1x117	0	1/17	1			1	1/17	1	1/17	1	1/17	1	1/17	1					1	1/17	1	12/17	0	4/17	0	1+S2/17	0
NA18518	CYP2A6	1/17			1/17	1	1/17	1	17x2/1x117	0	1/17	1			1	1/17	1	1/17	1	1/17	1	1/17	1					1	1/17	1	4/12	0	1/17	1	1+S6/17	0
NA18519	CYP2A6	1/1			1/1	1	1/1	1	1x3/18x115	0	1/1	1			1	1/1	1	1/1	1	1B/1	1	1/1	1					1	1/1	1	4/12	0	1B/1	1	1+S6/18	0
NA18524	CYP2A6	1/1			1/1	1	1/1	1	1x2/18x114	0	1/1	1			1	1/1	1	1/1	1	1/1	1	1/1+1	0					1	1/1	1	1/1	1	1/1	1	1/1	1
NA18526	CYP2A6	1/9	7/9	1	7/9	1	1/9	0	1/1x124	0	1/9	0			1	7/9	1	7/9	1	7/9	1	7/9	1					1	7/9	1	7/9	1	7/4	0	18/19	0
NA18540	CYP2A6	1/1			1/1	1	1/1	1	1/1x84	0	1/1	1			1	1/1	1	1/1	1	1B/1	1	1/1	1					1	1/1	1	1/1	1	4/1	0	1/1	1
NA18544	CYP2A6	1/19;7/18			1/19;7/18	1	1/19;7/18	1	18/18x122	0	1/19	1			1	1/19	1	1/19	1	19/1B10 ; 19/1B8	1	1/19	1					1	1/19	1	1/12	0	4/19	0	1/19	1
NA18552	CYP2A6	9/9			9/9	1	9/9	1	9/9x120	0	9/9	1			1	9/9	1	9/9	1	9/9	1	9/9	1					1	9/9	1	4/12	0	9/9	1	9/9+9	0
NA18563	CYP2A6	1/1	1/1;1/7	3	1/7	1	1/1	1	1/1x112	0	1/7	1			0													0
NA18564	CYP2A6	1/1			1/1	1	1/1	1	1x2/18x123	0	1/1	1			1	1/1	1	1/1	1	1B/1	1	1/1	1					1	1/12	0	1/12	0	4/1	0	18/18	0
NA18565	CYP2A6	4/15			4/15	1	4/15	1	15/15x59	0	15/15	0			1	4/15	1	4/15	1	4/15	1	4/15	1					1	4/15	1	4/15	1	4/15	1	4/15	1
NA18572	CYP2A6	1/1			1/1	1	1/1	1	1/1x114	0	1/1	1			0													0
NA18617	CYP2A6	1/4			1/4	1	1/4	1	1x3/18x55	0	1/1	0			1	1/4	1	1/4	1	4/1B	1	1/4	1					1	1/4	1	1/4	1	4/1B	1	1+S6/12	0
NA18855	CYP2A6	1/1			1/1	1	1/1	1	1/1x124	0	1/1	1			1	1/1	1	1/1	1	1/1	1	1/1	1					1	1/1	1	1/1	1	1/1	1	1/1	1
NA18861	CYP2A6	1+1/25			1+1/25	1	1+1/25	1	1/1x184	0	1/25	0			1	1+1/25	1	1+1/25	1	25/1x2	1	25/1	0					1	1+1/25	1	1+1/25	1	25/1x2	1	1+S2/1+1	0
NA18868	CYP2A6	1/17			1/17	1	1/17	1	1/1x123	0	1/17	1			1	1/17	1	1/17	1	1/17	1	1/17	1					1	1/17	1	1/17	1	1/17	1	17/18	0
NA18873	CYP2A6	1/9			1/9	1	1/9	1	1/1x119	0	1/9	1			0													0
NA18942	CYP2A6	1/4	4/7	1	4/7	1	1/4	0	7x2/1x55	0	1/7	0			1	4/7	1	1/4	0	4/7	1	4/7	1					1	4/5	0	1/4	0	4/7	1	4/18	0
NA18945	CYP2A6	4/9			4/9	1	4/9	1	9/9x60	0	9/9	0			0													0
NA18952	CYP2A6	4/4			4/4	1	4/4	1	18/18x3	0	18/18	0			1	4/4	1	4/4	1	4/other	0	4/18	0					1	4/5	0	4/15*	0	4/other	0	4/34	0
NA18959	CYP2A6	1/(4)	1/4	1	1/4	1	1/4	1	1x3/18x57	0	1/1	0			1	1/4	1	1/4	1	4/1B	1	1/4	1					1	1/4	1	1/4	1	4/1B	1	4/18	0
NA18966	CYP2A6	1/(4)	1/4	1	1/4	1	1/4	1	1x3/18x57	0	1/1	0			1	1/4	1	1/4	1	4/1B	1	1/4	1					1	1/1	0	4/12	0	4/1B	1	1+1/4	0
NA18973	CYP2A6	4/4			4/4	1	4/4	1	1/1x3	0	1/1	0			1	4/4	1	4/4	1	4/other	0	4/18	0					1	4/5	0	4/28*	0	4/other	0	4/34	0
NA18980	CYP2A6	9/9			9/9	1	9/9	1	9/9x122	0	9/9	1			1	9/9	1	9/9	1	9/9	1	9/9	1					1	9/9+9	0	9/12	0	9/9	1	9/9	1
NA18992	CYP2A6	9/18	9/19	1	9/19	1	9/18	0	18/18	0	9/19	1			1	9/19	1	9/19	1	19/9	1	9/19	1					1	9/19	1	9/19	1	19/9	1	1/19	0
NA19003	CYP2A6	1/1			1/1	1	1/1	1	1/1x118	0	1/1	1			1	1/1	1	1/1	1	1B/1B	1	1/1	1					1	1/1	1	1/1	1	1B/1B	1	18/18	0
NA19007	CYP2A6	1/(4)	1/4	1	1/4	1	1/4	1	1/1x60	0	1/1	0			1	1/4	1	1/4	1	4/1B	1	1/4	1					1	1/1	0	1/1	0	4/1B	1	4/18	0
NA19035	CYP2A6	9/17			9/17	1	9/17	1	9x3/18x114	0	9/17	1			0													0
NA19095	CYP2A6	9/9			9/9	1	9/9	1	9/9x120	0	9/9	1			1	9/9	1	9/9	1	9/9	1	9/9	1					1	9/9	1	4/12	0	9/9	1	9/9	1
NA19109	CYP2A6	17/20			17/20	1	17/20	1	17/18	0	1/17	0			1	17/20	1	17/20	1	17/20	1	1/17	0					1	17/20	1	17/20	1	17/20	1	1/17	0
NA19122	CYP2A6	1/1(35)	1/35	1	1/35	1	1/35	1	35x2/1x114	0	1/1	0			1	1/35	1	1/35	1	1/35	1	1+S6/35	0					1	1/35	1	4/12	0	1/35	1	1+S6/35	0
NA19143	CYP2A6	1/1(35)	1/35	1	1/35	1	1/35	1	35x2/1x113	0	1/1	0			1	1/35	1	1/35	1	1B/35	1	1/35	1					1	1/35	1	4/12	0	4/35	0	18/18	0
NA19147	CYP2A6	9/23			9/23	1	9/23	1	9x2/1x120	0	9/23	1			1	9/23	1	9/23	1	23/9	1	9/23	1					1	9/23	1	4/12	0	23/9	1	1+S2/18	0
NA19174	CYP2A6	9/24			9/24	1	9/24	1	24x2/9x113	0	9/24	1			1	9/24	1	9/24	1	24/9	1	9/24	1					1	9/24	1	1+9/24	0	24/9	1	9/24	1
NA19176	CYP2A6	1/1			1/1	1	1/1	1	1/1x118	0	1/1	1			1	1/1	1	1/1	1	1B/1	1	1/1	1					1	1/1	1	1/1	1	1B/1	1	1/1	1
NA19178	CYP2A6	1/20			1/20	1	1/20	1			1/1	0			1	1/20	1	1/20	1	1/20	1	1/1	0					1	1/20	1	1/12	0	1/20	1	1/1	0
NA19207	CYP2A6	1/17			1/17	1	1/17	1	17/1x114	0	1/17	1			1	1/17	1	1/17	1	1/17	1	1/17	1					1	1/17	1	12/17	0	1/17	1	17/18	0
NA19213	CYP2A6	17/24			17/24	1	17/24	1	1/1	0	1/17	0			1	1*/17	1	1*/17	1	17/24	1	17/24	1					1	1*/17	1	17/24	1	17/24	1	18/[17,18]	1
NA19226	CYP2A6	1/17			1/17	1	1/17	1	17x2/18x115	0	1/17	1			1	1/17	1	1/17	1	1/17	1	1/17	1					1	1/17	1	1/12	0	1/17	1	1/17	1
NA19238	CYP2A6	1/9			1/9	1	1/9	1	9x2/1x115	0	1/9	1			0													0
NA19239	CYP2A6	1/17			1/17	1	1/17	1	1x3/18x123	0	1/17	1			1	1/17	1	1/17	1	1B/17	1	1/17	1					1	1/17+17	0	12/17	0	1B/17	1	18/[17,18]	0
NA19444	CYP2A6	17/17			17/17	1	17/17	1	17/17x116	0	17/17	1			0													0
NA19700	CYP2A6	1(35)/17			17/35	1	17/35	1	35x2/17x110	0	1/17	1			0													0
NA19785	CYP2A6	1/1			1/1	1	1/1	1	1/1x116	0	1/1	1			0													0
NA19789	CYP2A6	1/1			1/1	1	1/1	1	1/1x107	0	1/1	1			1	1/1	1	1/1	1	1B/1	1	1/1+S6	0					1	1/1	1	4/12	0	1B/1	1	18/18	0
NA19819	CYP2A6	1/1			1/1	1	1/1	1	1/1x121	0	1/1	1			1	1/1	1	1/1	1	1/1	1	1/1	1					1	1/1	1	1/1	1	1/1	1	18/18	0
NA19908	CYP2A6	1/17			1/17	1	1/17	1	17/1x118	0	1/17	1			1	1/17	1	1/17	1	1/17	1	1/17	1					1	1/17+17	0	1/17+17	0	1/17	1	1+S2/18	0
NA19917	CYP2A6	1/1			1/1	1	1/1	1	1/1x115	0	1/1	1			1	1/1	1	1/1	1	1/1	1	1/1	1					1	1/1	1	4/12	0	1/1	1	18/18	0
NA19920	CYP2A6	1/1(35)			1/35	1	1/35	1	35x2/18x114	0	1/1	1			1	1/1	1	1/1	1	1/35	1	1/35	1					1	1/35	1	1/12	0	1/35	1	18/18	0
NA20296	CYP2A6	1/1			1/1	1	1/1	1	1/1x117	0	1/1	1			1	1/1	1	1/1	1	1B/1	1	1/1	1					1	1/1	1	1/1	1	1/1	1	18/18	0
NA20509	CYP2A6	1/1			1/1	1	1/1	1	1/1x116	0	1/1	1			1	1/1	1	1/1	1	1/1	1	1/1+S2	0					1	1/1	1	1/1+1	0	1/1	1	18/18	0
NA21781	CYP2A6	1/21			1/21	1	1/21	1	21/1x120	0	1/21	1			1	1/21	1	1/21	1	1B/21	1	1/21	1					1	1/21	1	12/21	0	1/21	1	1/21	1
NA23090	CYP2A6	1/9			1/9	1	1/9	1	9x2/1x115	0	1/9	1			0													0
NA23093	CYP2A6	1/1	1/7?	1	1/7	1	1/7	1	7x2/1x116	0	1/7	1			0													0
NA23246	CYP2A6	1/1			1/1	1	1/1	1	1/1x112	0	1/1	1			0													1	1/1	1	1/5	0	1/1	1	1/1	1
NA23275	CYP2A6	1/1			1/1	1	1/1	1	1/1x127	0	1/1	1			0													1	1/1+1	0	1/1+1	0	1/1	1	1/1+1	0
NA23296	CYP2A6	1/14			1/14	1	1/14	1	1/1x117	0	1/14	1			0													0
NA23297	CYP2A6	1/1			1/1	1	1/1	1	1/1x118	0	1/1	1			0													0
NA23313	CYP2A6	1/1			1/1	1	1/1	1	1/1x125	0	1/1	1			0													0
NA23348	CYP2A6	1/1			1/1	1	1/1	1	1x2/18x114	0	1/1	1			0													1	1/1	1	1/1	1	1B/1	1	1/1	1
NA23405	CYP2A6	1/1			1/1	1	1/1	1	1/1x115	0	1/1	1			0													0
NA23872	CYP2A6	1/1			1/1	1	1/1	1	1/1x117	0	1/1	1			0													0
NA23873	CYP2A6	1/1+1			1/1+1	1	1/1+1	1	18A/1B14 ; 18C/1B17 Duplication present	0	1/1	0			0													0
NA23874	CYP2A6	1/1			1/1	1	1/1	1	1/1x122	0	1/1	1			0													1	1/1	1	1/1	1	1B/1	1	1/1	1
NA23877	CYP2A6	1/1			1/1	1	1/1	1	1/1x120	0	1/1	1			0													0
NA23878	CYP2A6	1/1			1/1	1	1/1	1	1/1x116	0	1/1	1			0													0
NA23881	CYP2A6	1/1			1/1	1	1/1	1	1/1x119	0	1/1	1			0													0
NA24008	CYP2A6	1/9			1/9	1	1/9	1	9/1x123	0	1/9	1			0													1	1/9	1	4/12	0	1/9	1	1+S6/1+1	0
NA24009	CYP2A6	1/1			1/1	1	1/1	1	1/1x121	0	1/1	1			0													0
NA24027	CYP2A6	1/1(35)			1/1	1	1/1	1	1/1x113	0	1/1	1			0													1	1/1+1	0	1/1+1	0	1B/1	0	1+S6/1+1	0
NA24217	CYP2A6	1/1			1/1	1	1/1	1	1/18x120	0	1/1	1			0													0
HG00276	CYP2B6	2/(4)	2/4	1	2/4	1	2/4	1	1/1x11	0	2/4	1			1	2/4	1	2/4	1	2/4	1	1/4	0					1	2/4	1	2/4	1	2/4	1	1/4	0
HG00436	CYP2B6	1/6			1/6	1	1/6	1	9x2/1x10	0	1/6	1			1	1/6	1	1/6	1	1/6 ; 4/9	1	1/6	1					0
HG00589	CYP2B6	1/1			1/1	1	1/1	1	1/1x11	0	1/1	1			1	1/1	1	1/1	1	1/1	1	1/1	1					1	1/1	1	1/1	1	1/1	1	1/1	1
HG01190	CYP2B6	1(5)/1(27)	1/5	1	1/5	1	1/5	1	5/1x11	0	1/5	1			1	1/5	1	1/5	1	1/5	1	1/1	0					1	1/5	1	4/5	0	1/5	1	1/1+1	0
NA06991	CYP2B6	1/6			1/6	1	1/6	1	9/1x11	0	1/9	0			1	1/6	1	1/6	1	1/6 ; 4/9	1	1/6	1					1	1/6	1	1/6	1	1/6 ; 4/9	1	1/6+6+6	0
NA06993	CYP2B6	1/1			1/1	1	1/1	1	1/1x11	0	1/1	1			0													0
NA07000	CYP2B6	1/1			1/1	1	1/1	1	1/1x11	0	1/1	1			1	1/1	1	1/1	1	1/1	1	1/1+1	0					1	1/1	1	1/1	1	1/1	1	1/1	1
NA07019	CYP2B6	1(5)/1(22)	5/22	1	5/22	1	5/22	1	22x3/5x9	0	1/22	1			1	5/22	1	5/22	1	22/5	1	1/22	1					1	5/22	1	5/22	1	22/22	0	1/22	1
NA07029	CYP2B6	1(27)/6	1/6	2	1/6	1	1/6	1	1/1x12	0	1/6	1			1	1/6	1	1/6	1	1/6 ; 4/9	1	1/6	1					1	1/9	0	1/6	1	(full_gene_del)/9	0	1/9	0
NA07048	CYP2B6	1/1			1/1	1	1/1	1	1/1x12	0	1/1	1			0													0
NA07055	CYP2B6	1(27)/6	1/6	2	1/6	1	1/6	1	1/1x11	0	1/6	1			1	1/6	1	1/6	1	1/6 ; 4/9	1	1/6	1					1	1/6	1	1/6	1	1/6 ; 4/9	1	1/[6,9,4]	1
NA07056	CYP2B6	6/(22)	6/22	1	1/36	0	1/36	0	22x3/9x9	0	6/22	1			1	6/22	1	6/22	1	22/6	1	6/22	1					1	6/22	1	6/22	1	22/22	0	1/36	0
NA07348	CYP2B6	1/1			1/1	1	1/1	1	1/1x11	0	1/1	1			1	1/1	1	1/1	1	1/1	1	1/1	1					1	1/1	1	1/1	1	(full_gene_del)/1	0	1/1+1	0
NA07357	CYP2B6	1/1			1/1	1	1/1	1	1/1x11	0	1/1	1			1	1/1	1	1/1	1	1/1	1	1/1	1					1	1/1	1	1/1	1	(full_gene_del)/1	0	1/1	1
NA07439	CYP2B6	1/6			1/6	1	1/6	1	1/1x10	0	1/6	1			0													1	1/6	1	1/6	1	1/6 ; 4/9	1	1/[6,9,4]	1
NA10831	CYP2B6	1/1			1/1	1	1/1	1	1/1x11	0	1/1	1			1	1/1	1	1/1	1	1/1	1	1/1	1					1	1/1	1	1/1	1	1/1	1	1/1+1	0
NA10838	CYP2B6	6/6			6/6	1	6/6	1	9/9x11	0	6/6	1			0													0
NA10846	CYP2B6	1/1			1/1	1	1/1	1	1/1x11	0	1/1	1			0													0
NA10847	CYP2B6	1/6			1/6	1	1/6	1	1/1x11	0	1/6	1			1	1/6	1	1/6	1	1/6	1	1/6	1					1	1/6	1	1/6	1	6/6	0	1/6	1
NA10851	CYP2B6	1/1(27)	1/1	2	1/1	1	1/1	1	1/1x11	0	1/1	1			1	1/1	1	1/1	1	1/1	1	1/1	1					1	1/1	1	1/1	1	1/1	1	1/1+1	0
NA10854	CYP2B6	1/1			1/1	1	1/1	1	1/1x11	0	1/1	1			1	1/1	1	1/1	1	1/1	1	1/1	1					1	1/1	1	1/1	1	(full_gene_del)/1	0	1/1	1
NA10855	CYP2B6	1/5			1/5	1	1/5	1	5x2/1x10	0	1/5	1			0													0
NA10856	CYP2B6	1/1			1/1	1	1/1	1	1/1x11	0	1/1	1			0													0
NA10859	CYP2B6	1/6			1/6	1	1/6	1	9/1x11	0	1/6	1			0													0
NA10865	CYP2B6	1/(2;10)	1/2	1	1/2	1	1/2	1	2x2/1x11	0	1/2	1			0													0
NA11832	CYP2B6	1/1			1/1	1	1/1	1	1/1x11	0	1/1	1			1	1/1	1	1/1	1	1/1	1	1/1	1					1	1/1	1	1/1	1	(full_gene_del)/1	0	1/1	1
NA11839	CYP2B6	1/1(15)	1/15	1	1/15	1	1/15	1	1/1x11	0	1/15	1			1	1/15	1	1/15	1	1/15	1	1/15	1					1	1/15	1	1/15	1	(full_gene_del)/15	0	1/15	1
NA11881	CYP2B6	1/6			1/6	1	1/6	1	9x2/1x10	0	1/6	1			0													0
NA11993	CYP2B6	1/1			1/1	1	1/1	1	1/1x12	0	1/1	1			1	1/1	1	1/1	1	1/1	1	1/1	1					1	1/1	1	1/1	1	1/1	1	1/1+1	0
NA12003	CYP2B6	6/6			6/6	1	6/6	1	9/9x11	0	6/6	1			1	6/6	1	6/6	1	6/6	1	6/6	1					1	6/6	1	6/6	1	(full_gene_del)/6	0	6/6	1
NA12006	CYP2B6	1/1(5)	1/5	1	1/5	1	1/5	1	5/1x11	0	1/1	0			1	1/5	1	1/5	1	1/5	1	1/1	0					1	1/5	1	1/5	1	1/5	1	1/1	0
NA12145	CYP2B6	1/1			1/1	1	1/1	1	1/1x12	0	1/1	1			1	1/1	1	1/1	1	1/1	1	1/1	1					1	1/1	1	1/1	1	(full_gene_del)/1	0	1/1+1	0
NA12156	CYP2B6	1/1			1/1	1	1/1	1	1/1x11	0	1/1	1			1	1/1	1	1/1	1	1/1	1	1/1	1					1	1/1	1	1/1	1	(full_gene_del)/1	0	1/1+1	0
NA12236	CYP2B6	1/1(4)	1/4	1	1/4	1	1/4	1	1/1x11	0	1/4	1			0													1	1/4	1	1/4	1	1/1	0	1/4	1
NA12336	CYP2B6	5/6			5/6	1	5/6	1	9x2/1x10	0	1/6	0			0													0
NA12375	CYP2B6	1/6			1/6	1	1/6	1	9x2/1x10	0	1/6	1			0													0
NA12717	CYP2B6	5/6			5/6	1	5/6	1	5/1x11	0	1/6	0			1	1/7;5/6	1	1/7;5/6	1	1/7	1	1/6	0					1	5/6	1	1/7;5/6	1	(full_gene_del)/7	0	1/6	0
NA12753	CYP2B6	4/6			4/6	1	4/6	1	6x2/4x10	0	4/6	1			0													0
NA12813	CYP2B6	1/2			1/2	1	1/2	1	2/1x11	0	1/2	1			1	1/2	1	1/2	1	1/2	1	1/1	0					1	1/2	1	1/2	1	1/2	1	1/1+1	0
NA12815	CYP2B6	1/1			1/1	1	1/1	1	1/1x11	0	1/1	1			0													0
NA12873	CYP2B6	1/6			1/6	1	1/6	1	9x2/1x10	0	1/6	1			1	1/6	1	1/6	1	1/6	1	[6,9,4]/1	1					1	1/6	1	1/6	1	1/6	1	1/6	1
NA12878	CYP2B6	1/1			1/1	1	1/1	1	1/1x12	0	1/1	1			0													0
NA12892	CYP2B6	1/5			1/5	1	1/5	1	1/1x11	0	1/1	0			0													0
NA15245	CYP2B6	1/1(22)	1/22	1	1/22	1	1/22	1	22x4/1x8	0	1/22	1			0													1	1/22	1	1/22	1	1/22	1	1/22	1
NA17012	CYP2B6	1/1			1/1	1	1/1	1	1/1x10	0	1/1	1			0													0
NA17061	CYP2B6	1/1			1/1	1	1/1	1	1/1x11	0	1/1	1			0													0
NA17074	CYP2B6	1/6			1/6	1	1/6	1	9x2/1x10	0	1/6	1			0													1	1/6	1	1/6	1	1/6	1	[6,9,4]/1	1
NA17102	CYP2B6	6/6			6/6	1	6/6	1	9/9x11	0	6/6	1			0													1	6/6	1	6/6	1	6/6	1	6/6+6	0
NA17204	CYP2B6	1/1			1/1	1	1/1	1	1/1x11	0	1/1	1			0													1	1/1	1	1/1	1	1/1	1	1/1	1
NA17227	CYP2B6	1/1			1/1	1	1/1	1	1/1x11	0	1/1	1			0													1	1/1	1	1/1	1	1/1	1	1/1	1
NA17234	CYP2B6	1/6			1/6	1	1/6	1	9x2/1x10	0	1/6	1			0													1	1/6	1	1/6	1	1/6	1	[6,9,4]/1	1
NA17235	CYP2B6	1/7	1/7;5/6	3	5/6	1	5/6	1	9x4/1x8	0	5/6	1			0													1	5/6	1	1/7;5/6	1	1/7	1	5/6	1
NA17244	CYP2B6	1/6(7/22)	5/36	1	5/36	1	5/36	1	22/5	0	4/9	0			0													1	5/36	1	5/36	1	36/5	1	5+5+5/36	0
NA17288	CYP2B6	1/1			1/4	0	1/4	0	1/1x11	0	1/1	1			0													0
NA17290	CYP2B6	1/1			1/1	1	1/1	1	1/1x11	0	1/1	1			0													0
NA17448	CYP2B6	1/1(11)	1/1	2	1/1	1	1/1	1	1/1x11	0	1/1	1			0													1	1/1	1	1/1	1	1/1	1	1/1	1
NA17454	CYP2B6	1/6			1/6	1	1/6	1	9x2/1x10	0	1/6	1			0													1	1/6	1	1/6	1	(full_gene_del)/6	0	1/6	1
NA17641	CYP2B6	2/6			2/6	1	2/6	1	9x2/1x10	0	2/6	1			0													1	2/6	1	2/6	1	2/6	1	2/[6,9,4]	1
NA17642	CYP2B6	1(22)/6	1/36;6/22	3	1/36	1	1/36	1	22x4/9x8	0	4/9	0			0													1	6/22	1	1/36	1	1/36	1	6/22	1
NA17657	CYP2B6	1/6	1/(6;9?)	3	1/6	1	1/9	1	9x2/1x10	0	1/9	1			0													1	1/9	1	1/6	1	1/1	0	9/1	1
NA17658	CYP2B6	1/7	1/7;5/6	3	5/6	1	5/6	1	9x2/5x10	0	1/6	0			0													1	5/6	1	1/7;5/6	1	1/7	1	1/6	0
NA17660	CYP2B6	1/1			1/1	1	1/1	1	1/1x11	0	1/1	1			0													1	1/1	1	1/1	1	1/1	1	1/1	1
NA17673	CYP2B6	1/6			1/6	1	1/6	1	9x2/1x10	0	1/6	1			0													1	1/6	1	1/6	1	1/6 ; 4/9	1	1/6	1
NA17679	CYP2B6	1/6			1/6	1	1/6	1	9x3/1x9	0	1/6	1			0													1	1/6	1	1/6	1	1/6 ; 4/9	1	1/6	1
NA17702	CYP2B6	1/1(5)	1/5	1	1/5	1	1/5	1	5/1x11	0	1/1	0			0													1	1/5	1	1/5	1	1/5	1	1/1	0
NA18484	CYP2B6	1/18			1/18	1	1/18	1			1/18	1			1	1/18	1	1/18	1	1/18	1	29/[18,29]	0					1	1/18	1	1/18	1	1/18	1	1/18	1
NA18509	CYP2B6	1/6			1/6	1	1/6	1	9x2/1x10	0	1/6	1			1	1/6	1	1/6	1	1/6	1	1/6	1					1	1/6	1	1/6	1	(full_gene_del)/6	0	1/[6,9,4]	1
NA18518	CYP2B6	1/6			1/6	1	1/6	1	9x2/1x10	0	1/6	1			1	1/6	1	1/6	1	1/6 ; 4/9	1	1/6	1					1	1/6	1	1/6	1	1/6 ; 4/9	1	[6,9,4]/1	1
NA18519	CYP2B6	1/6	6/17	1	6/17	1	6/17	1	9x2/1x10	0	9/17	0			1	6/17	1	6/17	1	17/6	1	6/17	1					1	6/17	1	6/17	1	17/6	1	1/[6,9,4,17]	0
NA18524	CYP2B6	1/1(27)	1/1	2	1/1	1	1/1	1	1/1x11	0	1/1	1			1	1/1	1	1/1	1	1/1	1	1/1+1	0					1	1/1	1	1/1	1	1/1	1	1/1	1
NA18526	CYP2B6	1/1			1/1	1	1/1	1	1/1x11	0	1/1	1			1	1/1	1	1/1	1	1/1	1	1/1	1					1	1/1	1	1/1	1	(full_gene_del)/1	0	1/1	1
NA18540	CYP2B6	1/6			1/6	1	1/6	1	9/1x8	0	1/6	1			1	1/6	1	1/6	1	1/6	1	1/6	1					1	1/6	1	1/6	1	(full_gene_del)/6	0	1/6	1
NA18544	CYP2B6	1/1			1/1	1	1/1	1	1/1x12	0	1/1	1			1	1/1	1	1/1	1	1/1	1	1/1	1					1	1/1	1	1/1	1	(full_gene_del)/1	0	1/1+1	0
NA18552	CYP2B6	1/6			1/6	1	1/6	1	9x2/1x10	0	1/6	1			1	1/6	1	1/6	1	1/6	1	1/6	1					1	1/6	1	1/6	1	1/6	1	29/[29,6,9,4]	0
NA18563	CYP2B6	1/1			1/1	1	1/1	1	1/1x11	0	1/1	1			0													0
NA18564	CYP2B6	1/1			1/1	1	1/1	1	1/1x11	0	1/1	1			1	1/1	1	1/1	1	1/1	1	1/1	1					1	1/1	1	1/1	1	(full_gene_del)/1	0	1/1+1	0
NA18565	CYP2B6	1/1			1/1	1	1/1	1	1/1x11	0	1/1	1			1	1/1	1	1/1	1	1/1	1	1/1	1					1	1/1	1	1/1	1	1/1	1	1/1	1
NA18572	CYP2B6	1/1			1/1	1	1/1	1	1/1x11	0	1/1	1			0													0
NA18617	CYP2B6	1/1	1/4	1	1/4	1	1/4	1	1/1x11	0	1/4	1			1	1/4	1	1/4	1	1/4	1	1/4	1					1	1/4	1	1/4	1	(full_gene_del)/4	0	1/4	1
NA18855	CYP2B6	6/6			6/6	1	6/6	1	9/9x11	0	6/6	1			1	6/6	1	6/6	1	6/6	1	6/6	1					1	6/6	1	6/6	1	6/6	1	6/6	1
NA18861	CYP2B6	1/18			1/18	1	1/18	1	18x2/1x10	0	1/18	1			1	1/18	1	1/18	1	1/18	1	1/18	1					1	1/18	1	1/18	1	1/18	1	29/[18,29]	0
NA18868	CYP2B6	1/6			1/6	1	1/6	1	1/1x11	0	1/6	1			1	1/6	1	1/6	1	1/6 ; 4/9	1	1/6	1					1	1/6	1	1/6	1	1/6 ; 4/9	1	1/6	1
NA18873	CYP2B6	1/18			1/18	1	1/18	1	18x4/1x8	0	1/18	1			0													0
NA18942	CYP2B6	1/2			1/2	1	1/2	1	1/1x11	0	1/2	1			1	1/2	1	1/2	1	1/2	1	1/1	0					1	1/2	1	1/2	1	1/2	1	1/1	0
NA18945	CYP2B6	(2;10)/6	2/(6,7?)	3	2/7	1	2/7	1	2/5	0	2/6	1			0													0
NA18952	CYP2B6	1/1			1/1	1	1/1	1	1/1x11	0	1/1	1			1	1/1	1	1/1	1	1/1	1	1/1	1					1	1/1	1	1/1	1	1/1	1	1/1	1
NA18959	CYP2B6	1/1(27)	1/1	2	1/1	1	1/1	1	1/1x11	0	1/1	1			1	1/1	1	1/1	1	1/1	1	1/1	1					1	1/1	1	1/1	1	1/1	1	1/1+1	0
NA18966	CYP2B6	1/6			1/6	1	1/6	1	9x2/1x10	0	1/6	1			1	1/6	1	1/6	1	1/6 ; 4/9	1	1/6	1					1	1/6	1	1/6	1	1/6 ; 4/9	1	1/[6,9,4]	1
NA18973	CYP2B6	1/6			1/6	1	1/6	1	9x2/1x10	0	1/6	1			1	1/6	1	1/6	1	1/6	1	1/6	1					1	1/6	1	1/6	1	1/9	0	1/6	1
NA18980	CYP2B6	6/6			6/6	1	6/6	1	6/6x11	0	6/6	1			1	6/6	1	6/6	1	6/6	1	6/6	1					1	6/6	1	6/6	1	6/6	1	6/6	1
NA18992	CYP2B6	1/6			1/6	1	1/6	1	9x2/1x10	0	1/6	1			1	1/6	1	1/6	1	1/6 ; 4/9	1	1/6	1					1	1/6	1	1/6	1	1/6 ; 4/9	1	1/6	1
NA19003	CYP2B6	1/6			1/6	1	1/6	1	9x2/1x10	0	1/6	1			1	1/9	0	1/6	1	1/6 ; 4/9	1	1/6	1					1	1/6	1	1/6	1	(full_gene_del)/6	0	1/6	1
NA19007	CYP2B6	1/1	1/23	1	1/23	1	1/1	0	1/1x11	0	1/1	0			1	1/23	1	1/23	1	1/23	1	1/23	1					1	1/23	1	1/23	1	1/23	1	1/23	1
NA19035	CYP2B6	1/6			1/6	1	1/6	1	1/1x10	0	1/6	1			0													0
NA19095	CYP2B6	18/18			18/18	1	18/18	1	18/18x11	0	18/18	1			1	18/18	1	18/18	1	18/18	1	18/18	1					1	18/18	1	18/18	1	18/18	1	18/18	1
NA19109	CYP2B6	1/6			1/6	1	1/6	1	1/1x11	0	1/9	0			1	1/6	1	1/6	1	1/6 ; 4/9	1	1/6	1					1	1/6	1	1/6	1	1/6 ; 4/9	1	1/6	1
NA19122	CYP2B6	6/6			6/6	1	6/6	1	9/9x10	0	6/6	1			1	6/6	1	6/6	1	6/6	1	6/6	1					1	6/6	1	6/6	1	6/6	1	6/6+6	0
NA19143	CYP2B6	6/6			6/6	1	6/6	1	6/6x11	0	6/6	1			1	6/6	1	6/6	1	6/6	1	6/6	1					1	6/6	1	6/6	1	(full_gene_del)/6	0	6/6	1
NA19147	CYP2B6	1/18			1/18	1	1/18	1	18x4/1x8	0	1/18	1			1	1/18	1	1/18	1	1/18	1	1/18	1					1	1/18	1	1/18	1	(full_gene_del)/18	0	1/18	1
NA19174	CYP2B6	6/18	6/18;9/16	3	9/16	1	6/18	1	18x4/9x8	0	9/18	1			1	6/18	1	6/18	1	18/9 ; 18/6	1	6/18	1					1	6/18	1	6/18	1	18/9 ; 18/6	1	6/18	1
NA19176	CYP2B6	6/6			6/6	1	6/6	1	6/6x11	0	6/6	1			1	6/6	1	6/6	1	6/6	1	6/6	1					1	6/6	1	6/6	1	6/6	1	[29,6,9,4]/[29,6,9,4]	1
NA19178	CYP2B6	6/6	6/9	1	6/9	1	6/9	1	9/9x8	0	6/9	1			1	6/9	1	6/9	1	6/6	0	6/29	0					1	6/9	1	6/9	1	6/6	0	6/29	0
NA19207	CYP2B6	1/6			1/6	1	1/6	1	1/1x11	0	1/6	1			1	1/6	1	1/6	1	1/6 ; 4/9	1	1/6	1					1	1/6	1	1/6	1	1/6 ; 4/9	1	1/6	1
NA19213	CYP2B6	6/6			6/6	1	6/6	1	6/6x10	0	6/6	1			1	6/6	1	6/6	1	6/6	1	6/6	1					1	6/6	1	6/6	1	6/6	1	6/6	1
NA19226	CYP2B6	18/(20)	18/20	1	18*/20	1	18/20	1	18/20	1	18/20	1			1	18*/20	1	18/20	1	18/20	1	6/18	0					1	18*/20	1	18/20	1	18/20	1	1/18	0
NA19238	CYP2B6	1/6			1/6	1	1/6	1	9x2/1x9	0	1/9	0			0													0
NA19239	CYP2B6	1/6			1/6	1	1/6	1	1/1x11	0	1/6	1			1	1/6	1	1/9	0	1/9	0	1/6	1					1	1/6	1	1/6	1	1/6 ; 4/9	1	1/[6,9,4]	1
NA19444	CYP2B6	1/6			1/6	1	1/6	1	1/1x11	0	1/6	1			0													0
NA19700	CYP2B6	1/6	1/36?	1	1/36	1	1/36	1			4/9	0			0													0
NA19785	CYP2B6	1/1	1/5	1	1/5	1	1/5	1	5x2/1x10	0	1/1	0			0													0
NA19789	CYP2B6	1/1(27)	1/1	2	1/1	1	1/1	1	1/1x11	0	1/1	1			1	1/1	1	1/1	1	1/1	1	1/1+1	0					1	1/1	1	1/1	1	1/1	1	1/1	1
NA19819	CYP2B6	1/1			1/1	1	1/1	1	1/1x11	0	1/1	1			1	1/1	1	1/1	1	1/1	1	1/1	1					1	1/1	1	1/1	1	1/1	1	1/1	1
NA19908	CYP2B6	1/6			1/6	1	1/6	1	9/1x10	0	1/6	1			1	1/6	1	1/6	1	1/6 ; 4/9	1	1/6	1					1	1/6	1	1/6	1	(full_gene_del)/6	0	1/[6,9,4]	1
NA19917	CYP2B6	6/6			6/6	1	6/6	1	6/6x11	0	6/6	1			1	6/6	1	6/6	1	6/6	1	6/6	1					1	6/6	1	6/6	1	6/6	1	6/6	1
NA19920	CYP2B6	6/6			6/6	1	6/6	1	9/9x10	0	6/6	1			1	6/6	1	6/6	1	6/6	1	6/6	1					1	6/6	1	6/6	1	(full_gene_del)/6	0	6/6+6	0
NA20296	CYP2B6	1/2			1/2	1	1/2	1	2x2/1x10	0	1/2	1			1	1/2	1	1/2	1	1/2	1	1/1	0					1	1/2	1	1/2	1	1/2	1	1/1	0
NA20509	CYP2B6	1/7	1/7;5/(6,9?)	3	5/9	1	5/9	1	9x2/1x9	0	1/9	0			1	5/9	1	5/9	1	5/9	1	1/9	0					1	5/6	1	1/7;5/6	1	5/9	1	1/6	0
NA21781	CYP2B6	1/1	1/4	1	1/4	1	1/4	1	1/1x11	0	1/4	1			1	1/4	1	1/4	1	1/4	1	1/4	1					1	1/4	1	1/4	1	1/4	1	1/4	1
NA23090	CYP2B6	1/1			1/1	1	1/1	1	1/1x11	0	1/1	1			0													0
NA23093	CYP2B6	1/1			1/1	1	1/1	1	1/1x11	0	1/1	1			0													0
NA23246	CYP2B6	1/6			1/6	1	1/6	1	1/1x11	0	1/6	1			0													1	1/6	1	1/6	1	1/6	1	1/6	1
NA23275	CYP2B6	1/6			1/6	1	1/6	1	9/1x11	0	1/6	1			0													1	1/6	1	1/6	1	1/6 ; 4/9	1	1/[6,9,4]	1
NA23296	CYP2B6	1/1	4/5	1	4/5	1	4/5	1	5/1x11	0	1/4	0			0													0
NA23297	CYP2B6	1/1			1/1	1	1/1	1	1/1x11	0	1/1	1			0													0
NA23313	CYP2B6	1/7	5/6	1	5/6	1	5/6	1	1/1x11	0	1/6	0			0													0
NA23348	CYP2B6	1/7	5/6	1	5/6	1	5/6	1	9x2/5x10	0	5/6	1			0													1	5/6	1	1/7;5/6	1	1/7	0	5/6	1
NA23405	CYP2B6	1/6			1/6	1	1/6	1	9/1x11	0	1/6	1			0													0
NA23872	CYP2B6	1/1	1/5	1	1/5	1	1/5	1	5x3/1x10	0	1/1	0			0													0
NA23873	CYP2B6	1/1			1/1	1	1/1	1	1/1x11	0	1/1	1			0													0
NA23874	CYP2B6	2/(27)	1/2	2	1/2	1	1/2	1	1/1x11	0	1/2	1			0													1	1/2	1	1/2	1	(full_gene_del)/2	0	1/1	0
NA23877	CYP2B6	1/1			1/1	1	1/1	1	1/1	1	1/1	1			0													0
NA23878	CYP2B6	1/1	1/4	1	1/4	1	1/4	1	1/1x11	0	1/4	1			0													0
NA23881	CYP2B6	6/6			6/6	1	6/6	1	6/6x10	0	6/6	1			0													0
NA24008	CYP2B6	1/1			1/1	1	1/1	1	1/1x11	0	1/1	1			0													1	1/1	1	1/1	1	1/1	1	1/1+1	0
NA24009	CYP2B6	1/1			1/1	1	1/1	1	1/1x11	0	1/1	1			0													0
NA24027	CYP2B6	1/1	1/4	1	1/4	1	1/4	1	1/1x10	0	1/4	1			0													1	1/4	1	1/4	1	(full_gene_del)/4	0	1/4+4+4	0
NA24217	CYP2B6	6/(27)	1/(6,9?)	3	1/6	1	1/6	1	9/1x11	0	1/9	1			0													0
HG00276	CYP2C19	1/1			1B/1B	1	1B/1B	1	1/1	1	1/1	1	1/1	1	1	1B/1B	1	1B/1B	1	1/1	1	1/1	1	1/1	1			1	1B/1B	1	1B/1B	1	1/1	1	1/1	1	1/1	1
HG00436	CYP2C19	1/1			1B/1B	1	1B/1B	1	1/1x2	0	1/1	1	1/1	1	1	1B/1B	1	1B/1B	1	1/1	1	1/1	1	1/1	1			0
HG00589	CYP2C19	1/1			1B/1B	1	1B/1B	1	1/1	1	1/1	1	1/1	1	1	1B/1B	1	1B/1B	1	1/1	1	1/1	1	1/1	1			1	1B/1B	1	1B/1B	1	1/1	1	1/1	1	1/1	1
HG01190	CYP2C19	1/2			1B/2	1	1B/2	1	1/2	1	1/2	1	1/2	1	1	1B/2	1	1B/2	1	1/2	1	1/2	1	1/2	1			1	1B/2	1	1B/2	1	1/2	1	1/[2,35]	1	1/2	1
NA06991	CYP2C19	1/1			1B/1B	1	1B/1B	1	1/1x2	0	1/1	1	1/1	1	1	1B/1B	1	1B/1B	1	1/1	1	1/1	1	1/1	1			1	1B/1B	1	1B/1B	1	1/1	1	1/1+1+1	0	1/1	1
NA06993	CYP2C19	1/1			1B/1B	1	1B/1B	1	1/1x2	0	1/1	1	1/1	1	0													0
NA07000	CYP2C19	1/17			1B/17	1	1B/17	1	1/17x2	0	1/17	1	1/17	1	1	1B/17	1	1B/17	1	1/17	1	1/17	1	1/17	1			1	1B/17	1	1B/17	1	36/17	0	1/1	0	1/17	1
NA07019	CYP2C19	1/17			1B/17	1	1B/17	1	1/17x2	0	1/17	1	1/17	1	1	1B/17	1	1B/17	1	1/17	1	1/17	1	1/17	1			1	1B/17	1	1B/17	1	36/17	0	1/17	1	1/17	1
NA07029	CYP2C19	8/17			8/17	1	8/17	1	1/17x2	0	8/17	1	8/17	1	1	8/17	1	8/17	1	17/8	1	8/17	1	8/17	1			1	8/17	1	8/17	1	17/17	0	8/17	1	8/17	1
NA07048	CYP2C19	1/17			1B/17	1	1B/17	1	1/17x2	0	1/17	1	1/17	1	0													0
NA07055	CYP2C19	1/17			1B/17	1	1B/17	1			1/17	1	1/17	1	1	1B/17	1	1B/17	1	1/17	1	1/17	1	1/17	1			1	1B/17	1	1B/17	1	1/17	1	1/17	1	1/17	1
NA07056	CYP2C19	1/1			1B/1B	1	1B/1B	1	1/1x2	0	1/1	1	1/1	1	1	1B/1B	1	1B/1B	1	1/1	1	1/1	1	1/1	1			1	1B/1B	1	1B/1B	1	1/1	1	1/1	1	1/1	1
NA07348	CYP2C19	2/17			2B/17	1	2B/17	1	2/17x2	0	2/17	1	2/17	1	1	2B/17	1	2B/17	1	17/2	1	2/17	1	2/17	1			1	2B/17	1	2B/17	1	17/2	1	[2,35]/17	1	2/17	1
NA07357	CYP2C19	2/17			2B/17	1	2B/17	1	17/2x2	0	2/17	1	2/17	1	1	2B/17	1	2B/17	1	17/2	1	2/17	1	2/17	1			1	2B/17	1	2B/17	1	17/2	1	1/2	0	2/17	1
NA07439	CYP2C19	2/10			2/10	1	2/10	1	1/10	0	1/2	0	2/10	1	0													1	2/10	1	2/10	1	10/2	1	1/[2,35,10]	0	2/10	1
NA10831	CYP2C19	1/17			1B/17	1	1B/17	1	1/17x2	0	1/17	1	1/17	1	1	1B/17	1	1B/17	1	1/17	1	1/17	1	1/17	1			1	1B/17	1	1B/17	1	1/17	1	1/17	1	1/17	1
NA10838	CYP2C19	1/1			1B/1B	1	1B/1B	1	1/1x2	0	1/1	1	1/1	1	0													0
NA10846	CYP2C19	1/17			1B/17	1	1B/17	1	1/17	1	1/17	1	1/17	1	0													0
NA10847	CYP2C19	1/1			1B/1B	1	1B/1B	1	1/1x2	0	1/1	1	1/1	1	1	1B/1B	1	1B/1B	1	1/1	1	1/1	1	1/1	1			1	1B/1B	1	1B/1B	1	36/1	0	1/1	1	1/1	1
NA10851	CYP2C19	1/17			1B/17	1	1B/17	1	1/17	1	1/17	1	1/17	1	1	1B/17	1	1B/17	1	1/17	1	1/17	1	1/17	1			1	1B/17	1	1B/17	1	36/17	0	1/1	0	1/17	1
NA10854	CYP2C19	1/1			1B/1B	1	1B/1B	1	1/1x2	0	1/1	1	1/1	1	1	1B/1B	1	1B/1B	1	1/1	1	1/1	1	1/1	1			1	1B/1B	1	1B/1B	1	1/1	1	1/1	1	1/1	1
NA10855	CYP2C19	1/1			1/1B	1	1/1B	1	1/38x2	0	1/1	1	1/1	1	0													0
NA10856	CYP2C19	1/2			1B/2	1	1B/2	1	1/2	1	1/2	1	1/2	1	0													0
NA10859	CYP2C19	1/1			1B/1B	1	1B/1B	1	1/1x2	0	1/1	1	1/1	1	0													0
NA10865	CYP2C19	8/17			8/17	1	8/17	1	1/17x2	0	8/17	1	8/17	1	0													0
NA11832	CYP2C19	1/2			1/2	1	1/2	1	2/38	0	1/2	1	1/2	1	1	1/2	1	1/2	1	2/38	1	1/2	1	1/2	1			1	1/2	1	1/2	1	2/2	0	1/2	1	1/2	1
NA11839	CYP2C19	1/1			1/1B	1	1/1B	1	38/1x2	0	1/1	1	1/1	1	1	1/1B	1	1/1B	1	1/38	1	1/1	1	1/1	1			1	1/1B	1	1/1B	1	1/38	1	1/1+1	0	1/1	1
NA11881	CYP2C19	1/17			1B/17	1	1B/17	1	1/17x2	0	1/17	1	1/17	1	0													0
NA11993	CYP2C19	1/1			1B/1B	1	1B/1B	1	1/1x2	0	1/1	1	1/1	1	1	1B/1B	1	1B/1B	1	1/1	1	1/1	1	1/1	1			1	1B/1B	1	1B/1B	1	1/1	1	1/1+1	0	1/1	1
NA12003	CYP2C19	1/1			1B/1B	1	1B/1B	1	1/1x2	0	1/1	1	1/1	1	1	1B/1B	1	1B/1B	1	1/1	1	1/1	1	1/1	1			1	1B/1B	1	1B/1B	1	36/1	0	1/1	1	1/1	1
NA12006	CYP2C19	1/1			1B/1B	1	1B/1B	1	1/1x2	0	1/1	1	1/1	1	1	1B/1B	1	1B/1B	1	1/1	1	1/1	1	1/1	1			1	1B/1B	1	1B/1B	1	1/1	1	1/1	1	1/1	1
NA12145	CYP2C19	2/17			2B/17	1	2B/17	1	17/2	1	1/2	0	2/17	1	1	2B/17	1	2B/17	1	17/2	1	2/17	1	2/17	1			1	2B/17	1	2B/17	1	17/17	0	[2,35]/17	1	2/17	1
NA12156	CYP2C19	1/1			1B/1B	1	1B/1B	1	1/1x2	0	1/1	1	1/1	1	1	1B/1B	1	1B/1B	1	1/1	1	1/1	1	1/1	1			1	1B/1B	1	1B/1B	1	36/1	0	1/1+1	0	1/1	1
NA12236	CYP2C19	1/17			1B/17	1	1B/17	1	1/17x2	0	1/17	1	1/17	1	0													1	1B/17	1	1B/17	1	1/17	1	1/17	1	1/17	1
NA12336	CYP2C19	17/17			17/17	1	17/17	1	17/17x2	0	17/17	1	17/17	1	0													0
NA12375	CYP2C19	2/17			2/17	1	2/17	1	2/17x2	0	2/17	1	2/17	1	0													0
NA12717	CYP2C19	2/2			2/2	1	2/2	1	2/2x2	0	2/2	1	2/2	1	1	2/2	1	2/2	1	2/2	1	2/2	1	2/2	1			1	2/2	1	2/2	1	36/2	0	2/2	1	2/2	1
NA12753	CYP2C19	1/2			1B/2B	1	1B/2B	1	1/2x2	0	1/2	1	1/2	1	0													0
NA12813	CYP2C19	1/17			1/17	1	1/17	1	17/38	0	1/1	0	1/17	1	1	1/17	1	1/17	1	17/38	1	1/17	1	1/17	1			1	1/17	1	1/17	1	17/38	1	1/1	0	1/17	1
NA12815	CYP2C19	1/2			1B/2	1	1B/2	1	1/2x2	0	1/2	1	1/2	1	0													0
NA12873	CYP2C19	1/17			1B/17	1	1B/17	1	1/17x2	0	1/17	1	1/17	1	1	1B/17	1	1B/17	1	1/17	1	1/17	1	1/17	1			1	1B/17	1	1B/17	1	1/17	1	1/1	0	1/17	1
NA12878	CYP2C19	1/2			1B/2	1	1B/2	1	1/2x2	0	1/2	1	1/2	1	0													0
NA12892	CYP2C19	1/1			1B/1B	1	1B/1B	1	1/1x2	0	1/1	1	1/1	1	0													0
NA15245	CYP2C19	1/2			1B/2	1	1B/2	1	1/2x2	0	1/2	1	1/2	1	0													1	1B/2	1	1B/2	1	1/2	1	1/2	1	1/2	1
NA17012	CYP2C19	1/2			1B/2	1	1B/2	1	1/2	1	1/2	1	1/2	1	0													0
NA17061	CYP2C19	2/2			2/2	1	2/2	1	2/2	1	2/2	1	2/2	1	0													0
NA17074	CYP2C19	12/17			12/17	1	12/17	1	12/17x2	0	1/12	0	12/17	1	0													1	12/17	1	12/17	1	12/17	1	1/[12,17]	0	12/17	1
NA17102	CYP2C19	1/17			1B/17	1	1B/17	1	1/17x2	0	1/17	1	1/17	1	0													1	1B/17	1	1B/17	1	1/17	1	1/17	1	1/17	1
NA17204	CYP2C19	1/1			1/1B	1	1/1B	1	1/38x2	0	1/1	1	1/1	1	0													1	1/1B	1	1/1B	1	36/38	0	1/1	1	1/1	1
NA17227	CYP2C19	1/1			1B/1B	1	1B/1B	1	1/1x2	0	1/1	1	1/1	1	0													1	1B/1B	1	1B/1B	1	1/1	1	1/1	1	1/1	1
NA17234	CYP2C19	1/1			1/1B	1	1/1B	1	1/38x2	0	1/1	1	1/1	1	0													1	1/1B	1	1/1B	1	36/38	0	1/1+1	0	1/1	1
NA17235	CYP2C19	1/1			1B/1B	1	1B/1B	1	1/1x2	0	1/1	1	1/1	1	0													1	1B/1B	1	1B/1B	1	36/1	0	1/1	1	1/1	1
NA17244	CYP2C19	1/1			1B/1B	1	1B/1B	1	1/1x2	0	1/1	1	1/1	1	0													1	1B/1B	1	1B/1B	1	1/1	1	1/1+1+1	0	1/1	1
NA17288	CYP2C19	2/17			2B/17	1	2B/17	1	17/2x2	0	2/17	1	2/17	1	0													0
NA17290	CYP2C19	1/2			1/2	1	1/2	1	38/2x2	0	1/2	1	1/2	1	0													0
NA17448	CYP2C19	1/13			1B/13	1	1B/13	1	1/1x2	0	1/1	0	1/13	1	0													1	1B/13	1	1B/13	1	1/13	1	1/1	0	1/13	1
NA17454	CYP2C19	1/1			1B/1B	1	1B/1B	1	1/1x2	0	1/1	1	1/1	1	0													1	1B/1B	1	1B/1B	1	36/1	0	1/1	1	1/1	1
NA17641	CYP2C19	2/17			2B/17	1	2B/17	1	2/17x2	0	2/17	1	2/17	1	0													1	2B/17	1	2B/17	1	17/2	1	[2,35]/17	1	2/17	1
NA17642	CYP2C19	1/1			1/1B	1	1/1B	1	1/38x2	0	1/1	1	1/1	1	0													1	1/1B	1	1/1B	1	36/38	0	1/1	1	1/1	1
NA17657	CYP2C19	1/1			1B/1B	1	1B/1B	1	1/1x2	0	1/1	1	1/1	1	0													1	1B/1B	1	1B/1B	1	1/1	1	1/1	1	1/1	1
NA17658	CYP2C19	1/17			1B/17	1	1B/17	1	1/17x2	0	1/17	1	1/17	1	0													1	1B/17	1	1B/17	1	1/17	1	1/17	1	1/17	1
NA17660	CYP2C19	1/1			1B/1B	1	1B/1B	1	1/1x2	0	1/1	1	1/1	1	0													1	1B/1B	1	1B/1B	1	1/1	1	1/1	1	1/1	1
NA17673	CYP2C19	1/2			1B/2	1	1B/2	1	1/2x2	0	1/2	1	1/2	1	0													1	1B/2	1	1B/2	1	1/2	1	1/2	1	1/2	1
NA17679	CYP2C19	2/17			2/17	1	2/17	1	17/2	1	2/17	1	2/17	1	0													1	2/17	1	2/17	1	17/2	1	2/17	1	2/17	1
NA17702	CYP2C19	1/1			1B/1B	1	1B/1B	1	1/1x2	0	1/1	1	1/1	1	0													1	1B/1B	1	1B/1B	1	36/1	0	1/1	1	1/1	1
NA18484	CYP2C19	1/2			1B/2B	1	1B/2B	1	1/2x2	0	1/2	1	1/2	1	1	1B/2B	1	1B/2B	1	1/2	1	1/[2,35]	1	1/2	1			1	1B/2B	1	1B/2B	1	36/2	0	1/2	1	1/2	1
NA18509	CYP2C19	2/2			2/2	1	2/2	1	2/2x2	0	2/2	1	2/2	1	1	2/2	1	2/2	1	2/2	1	2/2	1	2/2	1			1	2/2	1	2/2	1	36/2	0	2/2+2	0	2/2	1
NA18518	CYP2C19	2/17			2/17	1	2/17	1	1/17	0	2/17	1	2/17	1	1	2/17	1	2/17	1	17/2	1	2/17	1	2/17	1			1	2/17	1	2/17	1	17/2	1	[2,35]/17	1	2/17	1
NA18519	CYP2C19	1/17			1B/17	1	1B/17	1	1/17x2	0	1/17	1	1/17	1	1	1B/17	1	1B/17	1	1/17	1	1/17	1	1/17	1			1	1B/17	1	1B/17	1	1/17	1	1/1	0	1/17	1
NA18524	CYP2C19	1/2			1/2	1	1/2	1	38/2x2	0	1/2	1	1/2	1	1	1/2	1	1/2	1	2/38	1	1/[2,35]	1	1/2	1			1	1/2	1	1/2	1	2/2	0	1/2	1	1/2	1
NA18526	CYP2C19	1/1			1B/1B	1	1B/1B	1	1/1x2	0	1/1	1	1/1	1	1	1B/1B	1	1B/1B	1	1/1	1	1/1	1	1/1	1			1	1B/1B	1	1B/1B	1	1/1	1	1/1	1	1/1	1
NA18540	CYP2C19	1/2			1B/2	1	1B/2	1	1/2	1	1/2	1	1/2	1	1	1B/2	1	1B/2	1	1/2	1	1/[2,35]	1	1/2	1			1	1B/2	1	1B/2	1	1/2	1	1/2	1	1/2	1
NA18544	CYP2C19	1/2			1B/2	1	1B/2	1	2/1x2	0	1/2	1	1/2	1	1	1B/2	1	1B/2	1	1/2	1	1/2	1	1/2	1			1	1B/2	1	1B/2	1	36/2	0	1/[2,35]	1	1/2	1
NA18552	CYP2C19	1/4			1B/4	1	1B/4	1	1/4x2	0	1/4	1	1/4	1	1	1B/4	1	1B/4	1	1/4	1	1/4	1	1/4	1			1	1B/4	1	1B/4	1	1/4	1	1/4	1	1/4	1
NA18563	CYP2C19	1/1			1/1B	1	1/1B	1	1/38x2	0	1/1	1	1/1	1	0													0
NA18564	CYP2C19	2/3			2/3	1	2/3	1	3/2x2	0	2/3	1	2/3	1	1	2/3	1	2/3	1	2/3	1	2/3	1	2/3	1			1	2/3	1	2/3	1	2/2	0	1/[2,3,35]	0	2/3	1
NA18565	CYP2C19	1/1			1B/1B	1	1B/1B	1	1/1x2	0	1/1	1	1/1	1	1	1B/1B	1	1B/1B	1	1/1	1	1/1	1	1/1	1			1	1B/1B	1	1B/1B	1	1/1	1	1/1	1	1/1	1
NA18572	CYP2C19	1/1			1B/1B	1	1B/1B	1	1/1x2	0	1/1	1	1/1	1	0													0
NA18617	CYP2C19	1/2			1B/2	1	1B/2	1	1/2	1	1/2	1	1/2	1	1	1B/2	1	1B/2	1	1/2	1	1/2	1	1/2	1			1	1B/2	1	1B/2	1	1/2	1	1/[2,35]	1	1/2	1
NA18855	CYP2C19	1/2			1B/2	1	1B/2	1	1/2x2	0	1/2	1	1/2	1	1	1B/2	1	1B/2	1	1/2	1	1/2	1	1/2	1			1	1B/2	1	1B/2	1	1/2	1	1/2	1	1/2	1
NA18861	CYP2C19	1/1			1B/1B	1	1B/1B	1	1/1x2	0	1/1	1	1/1	1	1	1B/1B	1	1B/1B	1	1/1	1	1/1	1	1/1	1			1	1B/1B	1	1B/1B	1	1/1	1	1/1	1	1/1	1
NA18868	CYP2C19	1/2			1B/2	1	1B/2	1	1/2x2	0	1/2	1	1/2	1	1	1B/2	1	1B/2	1	1/2	1	1/2	1	1/2	1			1	1B/2	1	1B/2	1	1/2	1	1/2	1	1/2	1
NA18873	CYP2C19	1/2			1B/2	1	1B/2	1	1/2x2	0	1/2	1	1/2	1	0													0
NA18942	CYP2C19	1/1			1B/1B	1	1B/1B	1	1/1x2	0	1/1	1	1/1	1	1	1B/1B	1	1B/1B	1	1/1	1	1/1+1	0	1/1	1			1	1B/1B	1	1B/1B	1	1/1	1	1/1	1	1/1	1
NA18945	CYP2C19	1/2			1B/2	1	1B/2	1	1/2	1	1/2	1	1/2	1	0													0
NA18952	CYP2C19	1/1			1/1B	1	1/1B	1	1/38x2	0	1/1	1	1/1	1	1	1/1B	1	1/1B	1	1/38	1	1/1	1	1/1	1			1	1/1B	1	1/1B	1	36/38	0	1/1	1	1/1	1
NA18959	CYP2C19	1/1			1/1B	1	1/1B	1	38/1x2	0	1/1	1	1/1	1	1	1/1B	1	1/1B	1	1/38	1	1/1	1	1/1	1			1	1/1B	1	1/1B	1	1/38	1	1/1+1	0	1/1	1
NA18966	CYP2C19	1/1			1B/1B	1	1B/1B	1	1/1x2	0	1/1	1	1/1	1	1	1B/1B	1	1B/1B	1	1/1	1	1/1	1	1/1	1			1	1B/1B	1	1B/1B	1	1/1	1	1/1+1	0	1/1	1
NA18973	CYP2C19	1/1			1B/1B	1	1B/1B	1	1/1	1	1/1	1	1/1	1	1	1B/1B	1	1B/1B	1	1/1	1	1/1	1	1/1	1			1	1B/1B	1	1B/1B	1	1/1	1	1/1	1	1/1	1
NA18980	CYP2C19	1/1			1B/1B	1	1B/1B	1	1/1	1	1/1	1	1/1	1	1	1B/1B	1	1B/1B	1	1/1	1	1/1	1	1/1	1			1	1B/1B	1	1B/1B	1	36/1	0	1/1	1	1/1	1
NA18992	CYP2C19	1/1			1B/1B	1	1B/1B	1	1/1	1	1/1	1	1/1	1	1	1B/1B	1	1B/1B	1	1/1	1	1/1	1	1/1	1			1	1B/1B	1	1B/1B	1	1/1	1	1/1	1	1/1	1
NA19003	CYP2C19	1/2			1B/2	1	1B/2	1	1/2x2	0	1/2	1	1/2	1	1	1B/2	1	1B/2	1	1/2	1	1/2	1	1/2	1			1	1B/2	1	1B/2	1	36/2	0	1/2	1	1/2	1
NA19007	CYP2C19	1/1			1B/1B	1	1B/1B	1	1/1x2	0	1/1	1	1/1	1	1	1B/1B	1	1B/1B	1	1/1	1	1/1	1	1/1	1			1	1B/1B	1	1B/1B	1	1/1	1	1/1	1	1/1	1
NA19035	CYP2C19	17/17			17/17	1	17/17	1	17/17	1	17/17	1	17/17	1	0													0
NA19095	CYP2C19	1/1			1B/1B	1	1B/1B	1	1/1x2	0	1/1	1	1/1	1	1	1B/1B	1	1B/1B	1	1/1	1	1/1	1	1/1	1			1	1B/1B	1	1B/1B	1	36/1	0	1/1	1	1/1	1
NA19109	CYP2C19	17/17			17/17	1	17/17	1	17/17x2	0	17/17	1	17/17	1	1	17/17	1	17/17	1	17/17	1	17/17	1	17/17	1			1	17/17	1	17/17	1	17/17	1	17/17	1	17/17	1
NA19122	CYP2C19	2/15	2/(15,35)	3	2/15*	1	2/15*	1	2/35	1	2/35	1	2/35	1	1	2/15*	1	2/15*	1	2/35	1	2/35	1	2/35	1			1	2/15*	1	2/15*	1	2/35	1	[2,35]/[35,15]	1	2/35	1
NA19143	CYP2C19	1/15	1/(15,39)	3	1B/15	1	1B/15	1	1/15	1	1/15	1	1/15	1	1	1B/15	1	1B/15	1	1/39	1	1/15	1	1/15	1			1	1B/15	1	1B/15	1	36/39	0	1/1	0	1/15	1
NA19147	CYP2C19	1/17			1B/17	1	1B/17	1	1/17x2	0	1/17	1	1/17	1	1	1B/17	1	1B/17	1	1/17	1	1/17	1	1/17	1			1	17/17	0	1B/17	1	36/17	0	1/1+1	0	1/17	1
NA19174	CYP2C19	1/2			1B/2	1	1B/2	1	1/2x2	0	1/2	1	1/2	1	1	1B/2	1	1B/2	1	1/2	1	1/2	1	1/2	1			1	1B/2	1	1B/2	1	1/2	1	1/2	1	1/2	1
NA19176	CYP2C19	2/17			2/17	1	2/17	1	2/17x2	0	2/17	1	2/17	1	1	2/17	1	2/17	1	17/2	1	2/17	1	2/17	1			1	2/17	1	2/17	1	17/2	1	2/17	1	2/17	1
NA19178	CYP2C19	1/6			1B/6	1	1B/6	1	1/1x2	0	1/6	1	1/6	1	1	1B/6	1	1B/6	1	1/6	1	1/6	1	1/6	1			1	1B/6	1	1B/6	1	1/6	1	1/6	1	1/6	1
NA19207	CYP2C19	2/17			2/17	1	2/17	1	2/17x2	0	2/17	1	2/17	1	1	2/17	1	2/17	1	17/2	1	2/17	1	2/17	1			1	2/17	1	2/17	1	17/2	1	1/2	0	2/17	1
NA19213	CYP2C19	1/15	1/(15,39)	3	1B/15	1	1B/15	1	1/15x2	0	1/15	1	1/15	1	1	1B/15	1	1B/15	1	1/39	1	1/15	1	1/15	1			1	1B/15	1	1B/15	1	1/39	1	1/1	0	1/15	1
NA19226	CYP2C19	1/2			1B/2	1	1B/2	1	1/2	1	1/2	1	1/2	1	1	1B/2	1	1B/2	1	1/2	1	1/2	1	1/2	1			1	1B/2	1	1B/2	1	1/2	1	1/2	1	1/2	1
NA19238	CYP2C19	1/1			1B/1B	1	1B/1B	1	1/1x2	0	1/1	1	1/1	1	0													0
NA19239	CYP2C19	13/17			13/17	1	13/17	1	13/17x2	0	1/17	0	13/17	1	1	13/17	1	13/17	1	13/17	1	13/17	1	13/17	1			1	13/17	1	13/17	1	17/17	0	1/1+1	0	13/17	1
NA19444	CYP2C19	1/17			1B/17	1	1B/17	1	1/17x2	0	1/17	1	1/17	1	0													0
NA19700	CYP2C19	1/1			1B/1B	1	1B/1B	1	1/1x2	0	1/1	1	1/1	1	0													0
NA19785	CYP2C19	1/1			1B/1B	1	1B/1B	1	1/1x2	0	1/1	1	1/1	1	0													0
NA19789	CYP2C19	1/1			1B/1B	1	1B/1B	1	1/1x2	0	1/1	1	1/1	1	1	1B/1B	1	1B/1B	1	1/1	1	1/1+1	0	1/1	1			1	1B/1B	1	1B/1B	1	1/1	1	1/1	1	1/1	1
NA19819	CYP2C19	1/17			1B/17	1	1B/17	1	1/17	1	1/17	1	1/17	1	1	1B/17	1	1B/17	1	1/17	1	1/17	1	1/17	1			1	1B/17	1	1B/17	1	1/17	1	1/1	0	1/17	1
NA19908	CYP2C19	1/17			1B/17	1	1B/17	1	1/17x2	0	1/17	1	1/17	1	1	1B/17	1	1B/17	1	1/17	1	1/17	1	1/17	1			1	1B/17	1	1B/17	1	36/17	0	1/1+1	0	1/17	1
NA19917	CYP2C19	2/15*			2B/15	1	2B/15	1	15/2x2	0	2/15	1	2/15	1	1	1B/2B	0	1B/2B	0	1/2	0	2/15	1	2/15	1			1	2B/15	1	2B/15	1	15/2	1	1/2	0	2/15	1
NA19920	CYP2C19	1/1			1B/1B	1	1B/1B	1	1/1x2	0	1/1	1	1/1	1	1	1B/1B	1	1B/1B	1	1/1	1	1/1	1	1/1	1			1	1B/1B	1	1B/1B	1	36/1	0	1/1	1	1/1	1
NA20296	CYP2C19	1/1			1B/1B	1	1B/1B	1	1/1x2	0	1/1	1	1/1	1	1	1B/1B	1	1B/1B	1	1/1	1	1/1	1	1/1	1			1	1B/1B	1	1B/1B	1	1/1	1	1/1	1	1/1	1
NA20509	CYP2C19	2/2			2/2B	1	2/2B	1	2/2	1	2/2	1	2/2	1	1	2/2B	1	2/2B	1	2/2	1	2/2+2	0	2/2	1			1	2/2B	1	2/2B	1	2/2	1	2/2	1	2/2	1
NA21781	CYP2C19	1/2			1B/2	1	1B/2	1	1/2	1	1/2	1	1/2	1	1	1B/2	1	1B/2	1	1/2	1	1/2	1	1/2	1			1	1B/2	1	1B/2	1	1/2	1	1/2	1	1/2	1
NA23090	CYP2C19	2/2			2/2	1	2/2	1	2/2x2	0	2/2	1	2/2	1	0													0
NA23093	CYP2C19	2/2			2/2	1	2/2	1	2/2x2	0	2/2	1	2/2	1	0													0
NA23246	CYP2C19	3/17			3/17	1	3/17	1	3/17x2	0	3/17	1	3/17	1	0													1	3/17	1	3/17	1	17/3	1	3/17	1	3/17	1
NA23275	CYP2C19	1/1			1B/1B	1	1B/1B	1	1/1x2	0	1/1	1	1/1	1	0													1	1B/1B	1	1B/1B	1	36/1	0	1/1+1	0	1/1	1
NA23296	CYP2C19	1/1			1B/1B	1	1B/1B	1	1/1x2	0	1/1	1	1/1	1	0													0
NA23297	CYP2C19	1/17			1B/17	1	1B/17	1	1/17x2	0	1/17	1	1/17	1	0													0
NA23313	CYP2C19	1/17			1B/17	1	1B/17	1	1/17x2	0	1/17	1	1/17	1	0													0
NA23348	CYP2C19	8/17			8/17	1	8/17	1	1/17x2	0	8/17	1	8/17	1	0													1	8/17	1	8/17	1	17/17	0	8/17	1	8/17	1
NA23405	CYP2C19	1/2			1/2	1	1/2	1	2/38	0	1/2	1	1/2	1	0													0
NA23872	CYP2C19	1/8			1B/8	1	1B/8	1	1/1x2	0	1/8	1	1/8	1	0													0
NA23873	CYP2C19	1/8			1B/8	1	1B/8	1	8/1x2	0	1/8	1	1/1;1/8;8/8	1	0													0
NA23874	CYP2C19	2/6			2/6	1	2/6	1	6/2x2	0	1/2	0	2/6	1	0													1	2/6	1	2/6	1	2/2	0	1/2	0	2/6	1
NA23877	CYP2C19	1/2			1B/2B	1	1B/2B	1	1/2	1	1/2	1	1/2	1	0													0
NA23878	CYP2C19	1/4;4/17			1B/4B;4/17	1	1B/4B;4/17	1	4/17x2	0	1/4	1	4/17	1	0													0
NA23881	CYP2C19	1/4			1B/4	1	1B/4	1	4/1x2	0	1/4	1	1/4	1	0													0
NA24008	CYP2C19	9/17			9/17	1	9/17	1	9/17x2	0	1/9	0	9/17	1	0													1	9/17	1	9/17	1	17/9	1	9/17	1	9/17	1
NA24009	CYP2C19	2/9			2/9	1	2/9	1	2/9	1	1/2	0	2/9	1	0													0
NA24027	CYP2C19	1/2			1B/2	1	1B/2	1	1/2	1	1/2	1	1/2	1	0													1	1B/2	1	1B/2	1	1/2	1	1/2+2+2	0	1/2	1
NA24217	CYP2C19	1/1			1B/1B	1	1B/1B	1	1/1x2	0	1/1	1	1/1	1	0													0
HG00276	CYP2C8	1/3			1/3	1	1/3	1			1/3	1	1/3	1	1	1/3	1	1/3	1			1/3	1	1/3	1			1	1/3	1	1/3	1			1/3	1	1/3	1
HG00436	CYP2C8	1/1			1/1	1	1/1	1			1/1	1	1/1	1	1	1/1	1	1/1	1			1/1	1	1/1	1			0
HG00589	CYP2C8	1/1			1/1	1	1/1	1			1/1	1	1/1	1	1	1/1	1	1/1	1			1/1	1	1/1	1			1	1/1	1	1/1	1			1/1	1	1/1	1
HG01190	CYP2C8	1/3			1/3	1	1/3	1			1/3	1	1/3	1	1	1/3	1	1/3	1			1/3	1	1/3	1			1	1/3	1	1/3	1			1/3	1	1/3	1
NA06991	CYP2C8	1/1			1/1	1	1/1	1			1/1	1	1/1	1	1	1/1	1	1/1	1			1/1	1	1/1	1			1	1/1	1	1/1	1			1/1+1+1	0	1/1	1
NA06993	CYP2C8	1/3			1/3	1	1/3	1			1/3	1	1/3	1	0													0
NA07000	CYP2C8	1/1			1/1	1	1/1	1			1/1	1	1/1	1	1	1/1	1	1/1	1			1/1+1	0	1/1	1			1	1/1	1	1/1	1			1/DEL	0	1/1	1
NA07019	CYP2C8	1/1			1/1	1	1/1	1			1/1	1	1/1	1	1	1/1	1	1/1	1			1/1	1	1/1	1			1	1/1	1	1/1	1			1/1	1	1/1	1
NA07029	CYP2C8	1/3			1/3	1	1/3	1			1/3	1	1/3	1	1	1/3	1	1/3	1			1/3	1	1/3	1			1	1/3	1	1/3	1			1/3	1	1/3	1
NA07048	CYP2C8	1/1	1/(1,18)	3	1/1	1	1/1	1			1/1	1	1/1	1	0													0
NA07055	CYP2C8	1/1			1/1	1	1/1	1			1/1	1	1/1	1	1	1/1	1	1/1	1			1/1	1	1/1	1			1	1/1	1	1/1	1			1/1	1	1/1	1
NA07056	CYP2C8	1/1			1/1	1	1/1	1			1/1	1	1/1	1	1	1/1	1	1/1	1			1/1	1	1/1	1			1	1/1	1	1/1	1			1/1+1	0	1/1	1
NA07348	CYP2C8	1/4			1/4	1	1/4	1			1/4	1	1/4	1	1	1/4	1	1/4	1			1/4	1	1/4	1			1	1/4	1	1/4	1			1/4	1	1/4	1
NA07357	CYP2C8	1/4			1/4	1	1/4	1			1/4	1	1/4	1	1	1/4	1	1/4	1			1/4	1	1/4	1			1	1/4	1	1/4	1			1/4	1	1/4	1
NA07439	CYP2C8	1/1			1/1	1	1/1	1			1/1	1	1/1	1	0													1	1/1	1	1/1	1			1/1+1	0	1/1	1
NA10831	CYP2C8	1/1			1/1	1	1/1	1			1/1	1	1/1	1	1	1/1	1	1/1	1			1/1	1	1/1	1			1	1/1	1	1/1	1			1/1+1	0	1/1	1
NA10838	CYP2C8	1/1			1/1	1	1/1	1			1/1	1	1/1	1	0													0
NA10846	CYP2C8	1/1			1/1	1	1/1	1			1/1	1	1/1	1	0													0
NA10847	CYP2C8	1/1			1/1	1	1/1	1			1/1	1	1/1	1	1	1/1	1	1/1	1			1/1	1	1/1	1			1	1/1	1	1/1	1			1/1	1	1/1	1
NA10851	CYP2C8	1/1			1/1	1	1/1	1			1/1	1	1/1	1	1	1/1	1	1/1	1			1/1+1	0	1/1	1			1	1/1	1	1/1	1			1/1+1	0	1/1	1
NA10854	CYP2C8	3/3			3/3	1	3/3	1			3/3	1	3/3	1	1	3/3	1	3/3	1			3/3	1	3/3	1			1	3/3	1	3/3	1			3/3+3	0	3/3	1
NA10855	CYP2C8	1/3			1/3	1	1/3	1			1/3	1	1/3	1	0													0
NA10856	CYP2C8	1/1			1/1	1	1/1	1			1/1	1	1/1	1	0													0
NA10859	CYP2C8	1/1			1/1	1	1/1	1			1/1	1	1/1	1	0													0
NA10865	CYP2C8	1/3			1/3	1	1/3	1			1/3	1	1/3	1	0													0
NA11832	CYP2C8	1/1			1/1	1	1/1	1			1/1	1	1/1	1	1	1/1	1	1/1	1			1/1+1	0	1/1	1			1	1/1	1	1/1	1			1/1	1	1/1	1
NA11839	CYP2C8	1/3			1/3	1	1/3	1			1/3	1	1/3	1	1	1/3	1	1/3	1			1/3	1	1/3	1			1	1/3	1	1/3	1			1/3	1	1/3	1
NA11881	CYP2C8	1/1			1/1	1	1/1	1			1/1	1	1/1	1	0													0
NA11993	CYP2C8	1/1			1/1	1	1/1	1			1/1	1	1/1	1	1	1/1	1	1/1	1			1/1	1	1/1	1			1	1/1	1	1/1	1			1/1+1	0	1/1	1
NA12003	CYP2C8	1/3			1/3	1	1/3	1			1/3	1	1/3	1	1	1/3	1	1/3	1			1/3	1	1/3	1			1	1/3	1	1/3	1			1/3	1	1/3	1
NA12006	CYP2C8	1/1			1/1	1	1/1	1			1/1	1	1/1	1	1	1/1	1	1/1	1			1/1	1	1/1	1			1	1/1	1	1/1	1			1/1	1	1/1	1
NA12145	CYP2C8	1/4			1/4	1	1/4	1			1/4	1	1/1;1/4;4/4	1	1	1/4	1	1/4	1			1/4	1	1/4	1			1	1/4	1	1/4	1			1/4	1	1/4	1
NA12156	CYP2C8	1/1	1/(1,15)	3	1/1	1	1/1	1			1/1	1	1/1	1	1	1/1	1	1/1	1			1/1	1	1/1	1			1	1/1	1	1/1	1			1/1+1	0	1/1	1
NA12236	CYP2C8	1/1			1/1	1	1/1	1			1/1	1	1/1	1	0													1	1/1	1	1/1	1			1/1+1	0	1/1	1
NA12336	CYP2C8	1/1			1/1	1	1/1	1			1/1	1	1/1	1	0													0
NA12375	CYP2C8	1/1			1/1	1	1/1	1			1/1	1	1/1	1	0													0
NA12717	CYP2C8	1/1			1/1	1	1/1	1			1/1	1	1/1	1	1	1/1	1	1/1	1			1/1	1	1/1	1			1	1/1	1	1/1	1			1/1	1	1/1	1
NA12753	CYP2C8	1/4			1/4	1	1/4	1			1/4	1	1/4	1	0													0
NA12813	CYP2C8	1/1			1/1	1	1/1	1			1/1	1	1/1	1	1	1/1	1	1/1	1			1/1	1	1/1	1			1	1/1	1	1/1	1			1/1+1	0	1/1	1
NA12815	CYP2C8	1/1			1/1	1	1/1	1			1/1	1	1/1	1	0													0
NA12873	CYP2C8	1/1			1/1	1	1/1	1			1/1	1	1/1	1	1	1/1	1	1/1	1			1/1+1	0	1/1	1			1	1/1	1	1/1	1			1/1+1	0	1/1	1
NA12878	CYP2C8	1/3			1/3	1	1/3	1			1/3	1	1/3	1	0													0
NA12892	CYP2C8	1/3			1/3	1	1/3	1			1/3	1	1/3	1	0													0
NA15245	CYP2C8	1/4			1/4	1	1/4	1			1/4	1	1/4	1	0													1	4/4	0	1/4	1			1/4	1	1/4	1
NA17012	CYP2C8	1/1			1/1	1	1/1	1			1/1	1	1/1	1	0													0
NA17061	CYP2C8	1/1			1/1	1	1/1	1			1/1	1	1/1	1	0													0
NA17074	CYP2C8	2/2			2/2	1	2/2	1			2/2	1	2/2	1	0													1	2/2	1	2/2	1			2/2+2	0	2/2	1
NA17102	CYP2C8	1/1			1/1	1	1/1	1			1/1	1	1/1	1	0													1	1/1	1	1/1	1			1/1+1	0	1/1	1
NA17204	CYP2C8	1/1			1/1	1	1/1	1			1/1	1	1/1	1	0													1	1/1	1	1/1	1			1/1	1	1/1	1
NA17227	CYP2C8	1/1			1/1	1	1/1	1			1/1	1	1/1	1	0													1	1/1	1	1/1	1			1/1	1	1/1	1
NA17234	CYP2C8	1/1			1/1	1	1/1	1			1/1	1	1/1	1	0													1	1/1	1	1/1	1			1/1+1	0	1/1	1
NA17235	CYP2C8	1/1			1/1	1	1/1	1			1/1	1	1/1	1	0													1	1/1	1	1/1	1			1/1	1	1/1	1
NA17244	CYP2C8	1/1			1/1	1	1/1	1			1/1	1	1/1	1	0													1	1/1	1	1/1	1			1/1+1+1	0	1/1	1
NA17288	CYP2C8	1/4			1/4	1	1/4	1			1/4	1	1/4	1	0													0
NA17290	CYP2C8	1/1			1/1	1	1/1	1			1/1	1	1/1	1	0													0
NA17448	CYP2C8	1/2			1/2	1	1/2	1			1/2	1	1/2	1	0													1	1/2	1	1/2	1			1/2	1	1/2	1
NA17454	CYP2C8	1/1			1/1	1	1/1	1			1/1	1	1/1	1	0													1	1/1	1	1/1	1			1/1	1	1/1	1
NA17641	CYP2C8	1/4			1/4	1	1/4	1			1/4	1	1/4	1	0													1	1/4	1	1/4	1			1/4	1	1/4	1
NA17642	CYP2C8	1/1			1/1	1	1/1	1			1/1	1	1/1	1	0													1	1/1	1	1/1	1			1/1	1	1/1	1
NA17657	CYP2C8	1/1			1/1	1	1/1	1			1/1	1	1/1	1	0													1	1/1	1	1/1	1			1/1+1	0	1/1	1
NA17658	CYP2C8	1/1			1/1	1	1/1	1			1/1	1	1/1	1	0													1	1/1	1	1/1	1			1/1	1	1/1	1
NA17660	CYP2C8	1/1			1/1	1	1/1	1			1/1	1	1/1	1	0													1	1/1	1	1/1	1			1/1	1	1/1	1
NA17673	CYP2C8	1/1			1/1	1	1/1	1			1/1	1	1/1	1	0													1	1/1	1	1/1	1			1/1	1	1/1	1
NA17679	CYP2C8	1/1			1/1	1	1/1	1			1/1	1	1/1	1	0													1	1/1	1	1/1	1			1/1	1	1/1	1
NA17702	CYP2C8	1/3			1/3	1	1/3	1			1/3	1	1/3	1	0													1	1/3	1	1/3	1			1/3	1	1/3	1
NA18484	CYP2C8	1/4			1/4	1	1/4	1			1/4	1	1/4	1	1	1/4	1	1/4	1			1/4	1	1/4	1			1	1/4	1	1/4	1			1/4	1	1/4	1
NA18509	CYP2C8	1/1			1/1	1	1/1	1			1/1	1	1/1	1	1	1/1	1	1/1	1			1/1	1	1/1	1			1	1/1	1	1/1	1			1/1+1	0	1/1	1
NA18518	CYP2C8	1/2			1/2	1	1/2	1			1/2	1	2/2	0	1	1/2	1	1/2	1			1/2	1	2/2	0			1	1/2	1	1/2	1			1/2	1	2/2	0
NA18519	CYP2C8	1/2			1/2	1	1/2	1			1/2	1	1/2	1	1	1/2	1	1/2	1			2/1	1	1/2	1			1	1/2	1	1/2	1			1/2	1	1/2	1
NA18524	CYP2C8	1/1			1/1	1	1/1	1			1/1	1	1/1	1	1	1/1	1	1/1	1			1/1+1	0	1/1	1			1	1/1	1	1/1	1			1/1	1	1/1	1
NA18526	CYP2C8	1/1			1/1	1	1/1	1			1/1	1	1/1	1	1	1/1	1	1/1	1			1/1	1	1/1	1			1	1/1	1	1/1	1			1/1	1	1/1	1
NA18540	CYP2C8	1/1			1/1	1	1/1	1			1/1	1	1/1	1	1	1/1	1	1/1	1			1/1+1	0	1/1	1			1	1/1	1	1/1	1			1/1	1	1/1	1
NA18544	CYP2C8	1/1			1/1	1	1/1	1			1/1	1	1/1	1	1	1/1	1	1/1	1			1/1	1	1/1	1			1	1/1	1	1/1	1			1/1+1	0	1/1	1
NA18552	CYP2C8	1/1			1/1	1	1/1	1			1/1	1	1/1	1	1	1/1	1	1/1	1			1/1	1	1/1	1			1	1/1	1	1/1	1			1/1	1	1/1	1
NA18563	CYP2C8	1/1			1/1	1	1/1	1			1/1	1	1/1	1	0													0
NA18564	CYP2C8	1/1			1/1	1	1/1	1			1/1	1	1/1	1	1	1/1	1	1/1	1			1/1	1	1/1	1			1	1/1	1	1/1	1			1/1+1	0	1/1	1
NA18565	CYP2C8	1/1			1/1	1	1/1	1			1/1	1	1/1	1	1	1/1	1	1/1	1			1/1	1	1/1	1			1	1/1	1	1/1	1			1/1	1	1/1	1
NA18572	CYP2C8	1/1			1/1	1	1/1	1			1/1	1	1/1	1	0													0
NA18617	CYP2C8	1/1			1/1	1	1/1	1			1/1	1	1/1	1	1	1/1	1	1/1	1			1/1	1	1/1	1			1	1/1	1	1/1	1			1/1+1	0	1/1	1
NA18855	CYP2C8	1/1			1/1	1	1/1	1			1/1	1	1/1	1	1	1/1	1	1/1	1			1/1	1	1/1	1			1	1/1	1	1/1	1			1/1	1	1/1	1
NA18861	CYP2C8	1/1			1/1	1	1/1	1			1/1	1	1/1	1	1	1/1	1	1/1	1			1/1+1	0	1/1	1			1	1/1	1	1/1	1			1/1	1	1/1	1
NA18868	CYP2C8	1/1			1/1	1	1/1	1			1/1	1	1/1	1	1	1/1	1	1/1	1			1/1	1	1/1	1			1	1/1	1	1/1	1			1/1	1	1/1	1
NA18873	CYP2C8	1/1			1/1	1	1/1	1			1/1	1	1/1	1	0													0
NA18942	CYP2C8	1/1			1/1	1	1/1	1			1/1	1	1/1	1	1	1/1	1	1/1	1			1/1+1	0	1/1	1			1	1/1	1	1/1	1			1/1	1	1/1	1
NA18945	CYP2C8	1/1			1/1	1	1/1	1			1/1	1	1/1	1	0													0
NA18952	CYP2C8	1/1			1/1	1	1/1	1			1/1	1	1/1	1	1	1/1	1	1/1	1			1/1	1	1/1	1			1	1/1	1	1/1	1			1/1	1	1/1	1
NA18959	CYP2C8	1/1			1/1	1	1/1	1			1/1	1	1/1	1	1	1/1	1	1/1	1			1/1	1	1/1	1			1	1/1	1	1/1	1			1/1	1	1/1	1
NA18966	CYP2C8	1/1			1/1	1	1/1	1			1/1	1	1/1	1	1	1/1	1	1/1	1			1/1	1	1/1	1			1	1/1	1	1/1	1			1/1+1	0	1/1	1
NA18973	CYP2C8	1/1			1/1	1	1/1	1			1/1	1	1/1	1	1	1/1	1	1/1	1			1/1+1	0	1/1	1			1	1/1	1	1/1	1			1/1	1	1/1	1
NA18980	CYP2C8	1/1			1/1	1	1/1	1			1/1	1	1/1	1	1	1/1	1	1/1	1			1/1+1	0	1/1	1			1	1/1	1	1/1	1			1/1	1	1/1	1
NA18992	CYP2C8	1/1			1/1	1	1/1	1			1/1	1	1/1	1	1	1/1	1	1/1	1			1/1	1	1/1	1			1	1/1	1	1/1	1			1/1	1	1/1	1
NA19003	CYP2C8	1/1			1/1	1	1/1	1			1/1	1	1/1	1	1	1/1	1	1/1	1			1/1	1	1/1	1			1	1/1	1	1/1	1			1/1	1	1/1	1
NA19007	CYP2C8	1/1			1/1	1	1/1	1			1/1	1	1/1	1	1	1/1	1	1/1	1			1/1	1	1/1	1			1	1/1	1	1/1	1			1/1	1	1/1	1
NA19035	CYP2C8	2/2			2/2	1	2/2	1			2/2	1	2/2	1	0													0
NA19095	CYP2C8	1/2			1/2	1	1/2	1			1/2	1	1/2	1	1	1/2	1	1/2	1			1/2	1	1/2	1			1	1/2	1	1/2	1			1/2	1	1/2	1
NA19109	CYP2C8	2/2			2/2	1	2/2	1			2/2	1	2/2	1	1	2/2	1	2/2	1			2/2	1	2/2	1			1	2/2	1	2/2	1			2/2	1	2/2	1
NA19122	CYP2C8	1/1			1/1	1	1/1	1			1/1	1	1/1	1	1	1/1	1	1/1	1			1/1+1	0	1/1	1			1	1/1	1	1/1	1			1/1+1	0	1/1	1
NA19143	CYP2C8	1/1	1/(1,17)	3	1/1	1	1/1	1			1/1	1	1/1	1	1	1/1	1	1/1	1			1/1	1	1/1	1			1	1/1	1	1/1	1			1/1	1	1/1	1
NA19147	CYP2C8	1/1			1/1	1	1/1	1			1/1	1	1/1	1	1	1/1	1	1/1	1			1/1	1	1/1	1			1	1/1	1	1/1	1			1/1+1	0	1/1	1
NA19174	CYP2C8	1/1			1/1	1	1/1	1			1/1	1	1/1	1	1	1/1	1	1/1	1			1/1	1	1/1	1			1	1/1	1	1/1	1			1/1	1	1/1	1
NA19176	CYP2C8	2/2			2/2	1	2/2	1			2/2	1	2/2	1	1	2/2	1	2/2	1			2/2	1	2/2	1			1	2/2	1	2/2	1			2/2	1	2/2	1
NA19178	CYP2C8	1/1			1/1	1	1/1	1			1/1	1	1/1	1	1	1/1	1	1/1	1			1/1	1	1/1	1			1	1/1	1	1/1	1			1/1	1	1/1	1
NA19207	CYP2C8	1/2			1/2	1	1/2	1			1/2	1	2/2	0	1	1/2	1	1/2	1			1/2	1	2/2	0			1	1/2	1	1/2	1			1/2	1	2/2	0
NA19213	CYP2C8	1/1	1/(1,17)	3	1/1	1	1/1	1			1/1	1	1/1	1	1	1/1	1	1/1	1			1/1	1	1/1	1			1	1/1	1	1/1	1			1/1+1	0	1/1	1
NA19226	CYP2C8	1/1			1/1	1	1/1	1			1/1	1	1/1	1	1	1/1	1	1/1	1			1/1	1	1/1	1			1	1/1	1	1/1	1			1/1	1	1/1	1
NA19238	CYP2C8	1/1			1/1	1	1/1	1			1/1	1	1/1	1	0													0
NA19239	CYP2C8	1/2			1/2	1	1/2	1			1/2	1	1/2	1	1	1/2	1	1/2	1			1/2	1	1/2	1			1	1/2	1	1/2	1			1/2	1	1/2	1
NA19444	CYP2C8	1/2			1/2	1	1/2	1			1/2	1	1/2	1	0													0
NA19700	CYP2C8	1/1			1/1	1	1/1	1			1/1	1	1/1	1	0													0
NA19785	CYP2C8	1/1			1/1	1	1/1	1			1/1	1	1/1	1	0													0
NA19789	CYP2C8	1/3			1/3	1	1/3	1			1/3	1	1/3	1	1	1/3	1	1/3	1			1/3	1	1/3	1			1	1/3	1	1/3	1			1/3	1	1/3	1
NA19819	CYP2C8	1/2			1/2	1	1/2	1			1/2	1	1/2	1	1	1/2	1	1/2	1			1/2	1	1/2	1			1	1/2	1	1/2	1			1/2	1	1/2	1
NA19908	CYP2C8	1/1			1/1	1	1/1	1			1/1	1	1/1	1	1	1/1	1	1/1	1			1/1+1	0	1/1	1			1	1/1	1	1/1	1			1/1+1	0	1/1	1
NA19917	CYP2C8	1/1	1/(1,16)	3	1/1	1	1/1	1			1/1	1	1/1	1	1	1/1	1	1/1	1			1/1	1	1/1	1			1	1/1	1	1/1	1			1/1	1	1/1	1
NA19920	CYP2C8	1/1			1/1	1	1/1	1			1/1	1	1/1	1	1	1/1	1	1/1	1			1/1	1	1/1	1			1	1/1	1	1/1	1			1/1+1	0	1/1	1
NA20296	CYP2C8	1/1			1/1	1	1/1	1			1/1	1	1/1	1	1	1/1	1	1/1	1			1/1	1	1/1	1			1	1/1	1	1/1	1			1/1	1	1/1	1
NA20509	CYP2C8	1/4			1/4	1	1/4	1			1/4	1	1/4	1	1	1/4	1	1/4	1			1/4	1	1/4	1			1	1/4	1	1/4	1			1/4	1	1/4	1
NA21781	CYP2C8	1/1			1/1	1	1/1	1			1/1	1	1/1	1	1	1/1	1	1/1	1			1/1	1	1/1	1			1	1/1	1	1/1	1			1/1	1	1/1	1
NA23090	CYP2C8	1/1			1/1	1	1/1	1			1/1	1	1/1	1	0													0
NA23093	CYP2C8	1/1			1/1	1	1/1	1			1/1	1	1/1	1	0													0
NA23246	CYP2C8	1/1			1/1	1	1/1	1			1/1	1	1/1	1	0													1	1/1	1	1/1	1			1/1	1	1/1	1
NA23275	CYP2C8	1/1			1/1	1	1/1	1			1/1	1	1/1	1	0													1	1/1	1	1/1	1			1/1+1	0	1/1	1
NA23296	CYP2C8	1/1			1/1	1	1/1	1			1/1	1	1/1	1	0													0
NA23297	CYP2C8	1/2			1/2	1	1/2	1			1/2	1	1/2	1	0													0
NA23313	CYP2C8	1/1			1/1	1	1/1	1			1/1	1	1/1	1	0													0
NA23348	CYP2C8	1/3			1/3	1	1/3	1			1/3	1	1/3	1	0													1	1/3	1	1/3	1			1/3	1	1/3	1
NA23405	CYP2C8	1/1			1/1	1	1/1	1			1/1	1	1/1	1	0													0
NA23872	CYP2C8	1/3			1/3	1	1/3	1			1/3	1	1/3	1	0													0
NA23873	CYP2C8	3/3			3/3	1	3/3	1			3/3	1	1/1;1/3;3/3	1	0													0
NA23874	CYP2C8	1/1			1/1	1	1/1	1			1/1	1	1/1	1	0													1	1/1	1	1/1	1			1/DEL	0	1/1	1
NA23877	CYP2C8	1/4			1/4	1	1/4	1			1/4	1	1/4	1	0													0
NA23878	CYP2C8	1/1			1/1	1	1/1	1			1/1	1	1/1	1	0													0
NA23881	CYP2C8	1/3			1/3	1	1/3	1			1/3	1	1/3	1	0													0
NA24008	CYP2C8	1/1			1/1	1	1/1	1			1/1	1	1/1	1	0													1	1/1	1	1/1	1			1/1+1	0	1/1	1
NA24009	CYP2C8	1/1			1/1	1	1/1	1			1/1	1	1/1	1	0													0
NA24027	CYP2C8	1/3			1/3	1	1/3	1			1/3	1	1/3	1	0													1	1/3	1	1/3	1			1/3+3+3	0	1/3	1
NA24217	CYP2C8	1/3			1/3	1	1/3	1			1/3	1	1/3	1	0													0
HG00276	CYP2C9	1/2			1/2	1	1/2	1	1/2	1	1/2	1	2/2	0	1	1/2	1	1/2	1	1/2	1	1/2	1	1/2	1			1	1/2	1	1/2	1	1/2	1	1/2	1	1/2	1
HG00436	CYP2C9	1/1			1/1	1	1/1	1	1/1	1	1/1	1	1/1	1	1	1/1	1	1/1	1	1/1	1	1/1	1	1/1	1			0
HG00589	CYP2C9	1/1			1/1	1	1/1	1	1/1	1	1/1	1	1/1	1	1	1/1	1	1/1	1	1/1	1	1/1	1	1/1	1			1	1/1	1	1/1	1	1/1	1	1/1	1	1/1	1
HG01190	CYP2C9	1/61			1/61	1	1/61	1	1/61	1	1/2	0	1/61	1	1	1/61	1	1/61	1	1/61	1	1/2	0	2/61	0			1	1/61	1	1/61	1	1/61	1	1/2	0	2/61	0
NA06991	CYP2C9	1/1			1/1	1	1/1	1	1/1	1	1/1	1	1/1	1	1	1/1	1	1/1	1	1/1	1	1/1	1	1/1	1			1	1/1	1	1/1	1	1/1	1	1/1+1+1	0	1/1	1
NA06993	CYP2C9	1/2			1/2	1	1/2	1	1/2	1	1/2	1	1/2	1	0													0
NA07000	CYP2C9	1/1			1/1	1	1/1	1	1/1	1	1/1	1	1/1	1	1	1/1	1	1/1	1	1/1	1	1/1+1	0	1/1	1			1	1/1	1	1/1	1	1/1	1	1/1	1	1/1	1
NA07019	CYP2C9	1/1			1/1	1	1/1	1			1/1	1	1/1	1	1	1/1	1	1/1	1	1/1	1	1/1	1	1/1	1			1	1/1	1	1/1	1	1/1	1	1/1	1	1/1	1
NA07029	CYP2C9	1/2			1/2	1	1/2	1	1/1	0	1/2	1	1/2	1	1	1/2	1	1/2	1	1/2	1	1/2	1	1/2	1			1	1/2	1	1/2	1	1/2	1	1/2	1	1/2	1
NA07048	CYP2C9	1/1			1/1	1	1/1	1	1/1	1	1/1	1	1/1	1	0													0
NA07055	CYP2C9	1/1			1/1	1	1/1	1	1/1	1	1/1	1	1/1	1	1	1/1	1	1/1	1	1/1	1	1/1	1	1/1	1			1	1/1	1	1/1	1	1/1	1	1/1+1	0	1/1	1
NA07056	CYP2C9	1/1			1/1	1	1/1	1	1/1	1	1/1	1	1/1	1	1	1/1	1	1/1	1	1/1	1	1/1	1	1/1	1			1	1/1	1	1/1	1	1/1	1	1/1	1	1/1	1
NA07348	CYP2C9	1/1			1/1	1	1/1	1	1/1	1	1/1	1	1/1	1	1	1/1	1	1/1	1	1/1	1	1/1	1	1/1	1			1	1/1	1	1/1	1	1/1	1	1/1+1	0	1/1	1
NA07357	CYP2C9	1/1			1/1	1	1/1	1	1/1	1	1/1	1	1/1	1	1	1/1	1	1/1	1	1/1	1	1/1	1	1/1	1			1	1/1	1	1/1	1	1/1	1	1/1	1	1/1	1
NA07439	CYP2C9	1/9			1/9	1	1/9	1	1/9	1	1/9	1	1/9	1	0													1	1/9	1	1/9	1	1/9	1	1/9	1	1/9	1
NA10831	CYP2C9	1/2			1/2	1	1/2	1	1/1	0	1/2	1	1/2	1	1	1/2	1	1/2	1	1/2	1	1/2	1	1/2	1			1	1/2	1	1/2	1	1/2	1	1/2	1	1/2	1
NA10838	CYP2C9	1/1			1/1	1	1/1	1	1/1	1	1/1	1	1/1	1	0													0
NA10846	CYP2C9	1/1			1/1	1	1/1	1	1/1	1	1/1	1	1/1	1	0													0
NA10847	CYP2C9	1/1			1/1	1	1/1	1	1/1	1	1/1	1	1/1	1	1	1/1	1	1/1	1	1/1	1	1/1	1	1/1	1			1	1/1	1	1/1	1	1/1	1	1/1	1	1/1	1
NA10851	CYP2C9	1/1			1/1	1	1/1	1	1/1	1	1/1	1	1/1	1	1	1/1	1	1/1	1	1/1	1	1/1+1	0	1/1	1			1	1/1	1	1/1	1	1/1	1	1/1+1	0	1/1	1
NA10854	CYP2C9	2/2			2/2	1	2/2	1	2/2	1	2/2	1	2/2	1	1	2/2	1	2/2	1	2/2	1	2/2	1	2/2	1			1	2/2	1	2/2	1	2/2	1	2/2+2	0	2/2	1
NA10855	CYP2C9	2/3			2/3	1	2/3	1	1/3	0	1/2	0	2/3	1	0													0
NA10856	CYP2C9	1/2			1/2	1	1/2	1	1/1	0	1/2	1	1/2	1	0													0
NA10859	CYP2C9	1/1			1/1	1	1/1	1	1/1	1	1/1	1	1/1	1	0													0
NA10865	CYP2C9	1/2			1/2	1	1/2	1	1/2	1	1/2	1	1/2	1	0													0
NA11832	CYP2C9	1/3			1/3	1	1/3	1	1/3	1	1/1	0	1/3	1	1	1/3	1	1/3	1	1/3	1	1/1+1	0	1/3	1			1	1/3	1	1/3	1	1/3	1	1/1	0	1/3	1
NA11839	CYP2C9	2/3			2/3	1	2/3	1			1/2	0	2/3	1	1	2/3	1	2/3	1	2/3	1	1/2	0	2/3	1			1	2/3	1	2/3	1	2/3	1	1/2	0	2/3	1
NA11881	CYP2C9	1/1			1/1	1	1/1	1	1/1	1	1/1	1	1/1	1	0													0
NA11993	CYP2C9	1/1			1/1	1	1/1	1	1/1	1	1/1	1	1/1	1	1	1/1	1	1/1	1	1/1	1	1/1	1	1/1	1			1	1/1	1	1/1	1	1/1	1	1/1+1	0	1/1	1
NA12003	CYP2C9	1/2			1/2	1	1/2	1	1/1	0	1/2	1	1/2	1	1	1/2	1	1/2	1	1/2	1	1/2	1	1/2	1			1	1/2	1	1/2	1	1/2	1	1/2	1	1/2	1
NA12006	CYP2C9	1/1			1/1	1	1/1	1			1/1	1	1/1	1	1	1/1	1	1/1	1	1/1	1	1/1	1	1/1	1			1	1/1	1	1/1	1	1/1	1	1/1	1	1/1	1
NA12145	CYP2C9	1/1			1/1	1	1/1	1	1/1	1	1/1	1	1/1	1	1	1/1	1	1/1	1	1/1	1	1/1	1	1/1	1			1	1/1	1	1/1	1	1/1	1	1/1+1	0	1/1	1
NA12156	CYP2C9	1/2			1/2	1	1/2	1	1/2	1	1/2	1	2/2	0	1	1/2	1	1/2	1	1/2	1	1/2	1	1/2	1			1	1/2	1	1/2	1	1/2	1	1/2	1	1/2	1
NA12236	CYP2C9	1/1			1/1	1	1/1	1	1/1	1	1/1	1	1/1	1	0													1	1/1	1	1/1	1	1/1	1	1/1+1	0	1/1	1
NA12336	CYP2C9	1/1			1/1	1	1/1	1	1/1	1	1/1	1	1/1	1	0													0
NA12375	CYP2C9	1/1			1/1	1	1/1	1	1/1	1	1/1	1	1/1	1	0													0
NA12717	CYP2C9	1/1			1/1	1	1/1	1	1/1	1	1/1	1	1/1	1	1	1/1	1	1/1	1	1/1	1	1/1	1	1/1	1			1	1/1	1	1/1	1	1/1	1	1/1	1	1/1	1
NA12753	CYP2C9	1/9			1/9	1	1/9	1	1/9	1	1/9	1	1/9	1	0													0
NA12813	CYP2C9	1/3			1/3	1	1/3	1	1/1	0	1/1	0	1/3	1	1	1/3	1	1/3	1	1/3	1	1/1	0	1/3	1			1	1/3	1	1/3	1	1/3	1	1/1+1	0	1/3	1
NA12815	CYP2C9	1/8			1/8	1	1/8	1	1/8	1	1/8	1	1/1	0	0													0
NA12873	CYP2C9	1/1			1/1	1	1/1	1	1/1	1	1/1	1	1/1	1	1	1/1	1	1/1	1	1/1	1	1/1+1	0	1/1	1			1	1/1	1	1/1	1	1/1	1	1/1	1	1/1	1
NA12878	CYP2C9	1/2			1/2	1	1/2	1	1/1	0	1/2	1	1/2	1	0													0
NA12892	CYP2C9	1/2			1/2	1	1/2	1	1/2	1	1/2	1	1/2	1	0													0
NA15245	CYP2C9	10/12	10/12;1/71	3	10/12	1	10/12	1			1/12	0	10/12	1	0													1	1/71	1	10/12	1			1/12	0	10/12	1
NA17012	CYP2C9	1/1			1/1	1	1/1	1	1/1	1	1/1	1	1/1	1	0													0
NA17061	CYP2C9	1/1			1/1	1	1/1	1	1/1	1	1/1	1	1/1	1	0													0
NA17074	CYP2C9	1/1			1/1	1	1/1	1	1/1	1	1/1	1	1/1	1	0													1	1/1	1	1/1	1	1/1	1	1/1	1	1/1	1
NA17102	CYP2C9	5/36			5/36	1	5/36	1	36/5	1	1/36	0	5/36	1	0													1	5/36	1	5/36	1	36/5	1	1/[36,5]	0	5/36	1
NA17204	CYP2C9	1/3			1/3	1	1/3	1	1/3	1	1/1	0	1/3	1	0													1	1/3	1	1/3	1	1/3	1	1/1	0	1/3	1
NA17227	CYP2C9	1/2			1/2	1	1/2	1	1/2	1	1/2	1	1/2	1	0													1	1/2	1	1/2	1	1/2	1	1/2	1	1/2	1
NA17234	CYP2C9	1/3			1/3	1	1/3	1	1/3	1	1/1	0	1/3	1	0													1	1/3	1	1/3	1	1/3	1	1/1+1	0	1/3	1
NA17235	CYP2C9	1/1			1/1	1	1/1	1	1/1	1	1/1	1	1/1	1	0													1	1/1	1	1/1	1	1/1	1	1/1	1	1/1	1
NA17244	CYP2C9	1/1			1/1	1	1/1	1	1/1	1	1/1	1	1/1	1	0													1	1/1	1	1/1	1	1/1	1	1/1+1+1	0	1/1	1
NA17288	CYP2C9	1/1			1/1	1	1/1	1	1/1	1	1/1	1	1/1	1	0													0
NA17290	CYP2C9	1/3			1/3	1	1/3	1	1/1	0	1/1	0	1/3	1	0													0
NA17448	CYP2C9	1/1			1/1	1	1/1	1	1/1	1	1/1	1	1/1	1	0													1	1/1	1	1/1	1	1/1	1	1/1	1	1/1	1
NA17454	CYP2C9	1/8			1/8	1	1/8	1	1/8	1	1/8	1	1/1	0	0													1	1/8	1	1/8	1	1/8	1	1/8	1	1/8	1
NA17641	CYP2C9	1/1			1/1	1	1/1	1	1/1	1	1/1	1	1/1	1	0													1	1/1	1	1/1	1	1/1	1	1/1+1	0	1/1	1
NA17642	CYP2C9	1/3			1/3	1	1/3	1	1/3	1	1/1	0	1/3	1	0													1	1/3	1	1/3	1	1/3	1	1/1	0	1/3	1
NA17657	CYP2C9	1/1			1/1	1	1/1	1			1/1	1	1/1	1	0													1	1/1	1	1/1	1	1/1	1	1/1+1	0	1/1	1
NA17658	CYP2C9	1/1			1/1	1	1/1	1	1/1	1	1/1	1	1/1	1	0													1	1/1	1	1/1	1	1/1	1	1/1	1	1/1	1
NA17660	CYP2C9	1/1			1/1	1	1/1	1	1/1	1	1/1	1	1/1	1	0													1	1/1	1	1/1	1	1/1	1	1/1	1	1/1	1
NA17673	CYP2C9	1/1			1/1	1	1/1	1	1/1	1	1/1	1	1/1	1	0													1	1/1	1	1/1	1	1/1	1	1/1	1	1/1	1
NA17679	CYP2C9	1/1			1/1	1	1/1	1	1/1	1	1/1	1	1/1	1	0													1	1/1	1	1/1	1	1/1	1	1/1	1	1/1	1
NA17702	CYP2C9	1/2			1/2	1	1/2	1	1/1	0	1/2	1	1/2	1	0													1	1/2	1	1/2	1	1/2	1	1/2	1	1/2	1
NA18484	CYP2C9	1/9			1/9	1	1/9	1	1/9	1	1/9	1	1/9	1	1	1/9	1	1/9	1	1/9	1	9/1	1	1/9	1			1	1/9	1	1/9	1	1/9	1	1/9	1	1/9	1
NA18509	CYP2C9	1/1			1/1	1	1/1	1	1/1	1	1/1	1	1/1	1	1	1/1	1	1/1	1	1/1	1	1/1	1	1/1	1			1	1/1	1	1/1	1	1/1	1	1/1+1	0	1/1	1
NA18518	CYP2C9	1/1			1/1	1	1/1	1	1/1	1	1/1	1	1/1	1	1	1/1	1	1/1	1	1/1	1	1/1	1	1/1	1			1	1/1	1	1/1	1	1/1	1	1/1+1	0	1/1	1
NA18519	CYP2C9	1/5			1/5	1	1/5	1	1/5	1	1/5	1	1/5	1	1	1/5	1	1/5	1	1/5	1	1/5	1	1/5	1			1	1/5	1	1/5	1	1/5	1	1/5	1	1/5	1
NA18524	CYP2C9	1/3			1/3	1	1/3	1	1/3	1	1/1	0	1/3	1	1	1/3	1	1/3	1	1/3	1	1/1+1	0	1/3	1			1	1/3	1	1/3	1	1/3	1	1/1	0	1/3	1
NA18526	CYP2C9	1/1			1/1	1	1/1	1	1/1	1	1/1	1	1/1	1	1	1/1	1	1/1	1	1/1	1	1/1	1	1/1	1			1	1/1	1	1/1	1	1/1	1	1/1	1	1/1	1
NA18540	CYP2C9	1/1			1/1	1	1/1	1	1/1	1	1/1	1	1/1	1	1	1/1	1	1/1	1	1/1	1	1/1+1	0	1/1	1			1	1/1	1	1/1	1	1/1	1	1/1	1	1/1	1
NA18544	CYP2C9	1/1			1/1	1	1/1	1	1/1	1	1/1	1	1/1	1	1	1/1	1	1/1	1	1/1	1	1/1	1	1/1	1			1	1/1	1	1/1	1	1/1	1	1/1+1	0	1/1	1
NA18552	CYP2C9	1/1			1/1	1	1/1	1	1/1	1	1/1	1	1/1	1	1	1/1	1	1/1	1	1/1	1	1/1	1	1/1	1			1	1/1	1	1/1	1	1/1	1	1/1	1	1/1	1
NA18563	CYP2C9	1/3			1/3	1	1/3	1	1/3	1	1/1	0	1/3	1	0													0
NA18564	CYP2C9	1/1			1/1	1	1/1	1	1/1	1	1/1	1	1/1	1	1	1/1	1	1/1	1	1/1	1	1/1	1	1/1	1			1	1/1	1	1/1	1	1/1	1	1/1+1	0	1/1	1
NA18565	CYP2C9	1/1			1/1	1	1/1	1	1/1	1	1/1	1	1/1	1	1	1/1	1	1/1	1	1/1	1	1/1	1	1/1	1			1	1/1	1	1/1	1	1/1	1	1/1+1	0	1/1	1
NA18572	CYP2C9	1/1			1/1	1	1/1	1	1/1	1	1/1	1	1/1	1	0													0
NA18617	CYP2C9	1/1			1/1	1	1/1	1	1/1	1	1/1	1	1/1	1	1	1/1	1	1/1	1	1/1	1	1/1	1	1/1	1			1	1/1	1	1/1	1	1/1	1	1/1+1	0	1/1	1
NA18855	CYP2C9	1/9			1/9	1	1/9	1	1/9	1	1/9	1	1/9	1	1	1/9	1	1/9	1	1/9	1	1/9	1	1/9	1			1	1/9	1	1/9	1	1/9	1	1/9	1	1/9	1
NA18861	CYP2C9	1/1			1/1	1	1/1	1	1/1	1	1/1	1	1/1	1	1	1/1	1	1/1	1	1/1	1	1/1	1	1/1	1			1	1/1	1	1/1	1	1/1	1	1/1	1	1/1	1
NA18868	CYP2C9	1/1			1/1	1	1/1	1	1/1	1	1/1	1	1/1	1	1	1/1	1	1/1	1	1/1	1	1/1	1	1/1	1			1	1/1	1	1/1	1	1/1	1	1/1	1	1/1	1
NA18873	CYP2C9	1/8			1/8	1	1/8	1	1/8	1	1/8	1	1/1	0	0													0
NA18942	CYP2C9	1/1			1/1	1	1/1	1	1/1	1	1/1	1	1/1	1	1	1/1	1	1/1	1	1/1	1	1/1+1	0	1/1	1			1	1/1	1	1/1	1	1/1	1	1/1	1	1/1	1
NA18945	CYP2C9	1/1			1/1	1	1/1	1	1/1	1	1/1	1	1/1	1	0													0
NA18952	CYP2C9	1/1			1/1	1	1/1	1	1/1	1	1/1	1	1/1	1	1	1/1	1	1/1	1	1/1	1	1/1	1	1/1	1			1	1/1	1	1/1	1	1/1	1	1/1	1	1/1	1
NA18959	CYP2C9	1/3			1/3	1	1/3	1	1/3	1	1/1	0	1/3	1	1	1/3	1	1/3	1	1/3	1	1/1	0	1/3	1			1	1/3	1	1/3	1	1/3	1	1/1	0	1/3	1
NA18966	CYP2C9	1/1			1/1	1	1/1	1	1/1	1	1/1	1	1/1	1	1	1/1	1	1/1	1	1/1	1	1/S1	0	1/1	1			1	1/1	1	1/1	1	1/1	1	1/S1	0	1/1	1
NA18973	CYP2C9	1/1			1/1	1	1/1	1	1/1	1	1/1	1	1/1	1	1	1/1	1	1/1	1	1/1	1	1/1	1	1/1	1			1	1/1	1	1/1	1	1/1	1	1/1	1	1/1	1
NA18980	CYP2C9	1/1			1/1	1	1/1	1	1/1	1	1/1	1	1/1	1	1	1/1	1	1/1	1	1/1	1	1/1+1	0	1/1	1			1	1/1	1	1/1	1	1/1	1	1/1	1	1/1	1
NA18992	CYP2C9	1/1			1/1	1	1/1	1	1/1	1	1/1	1	1/1	1	1	1/1	1	1/1	1	1/1	1	1/1	1	1/1	1			1	1/1	1	1/1	1	1/1	1	1/1	1	1/1	1
NA19003	CYP2C9	1/1			1/1	1	1/1	1	1/1	1	1/1	1	1/1	1	1	1/1	1	1/1	1	1/1	1	1/1	1	1/1	1			1	1/1	1	1/1	1	1/1	1	1/1	1	1/1	1
NA19007	CYP2C9	1/1			1/1	1	1/1	1	1/1	1	1/1	1	1/1	1	1	1/1	1	1/1	1	1/1	1	1/1	1	1/1	1			1	1/1	1	1/1	1	1/1	1	1/1	1	1/1	1
NA19035	CYP2C9	1/1			1/1	1	1/1	1	1/1	1	1/1	1	1/1	1	0													0
NA19095	CYP2C9	1/1			1/1	1	1/1	1	1/1	1	1/1	1	1/1	1	1	1/1	1	1/1	1	1/1	1	1/1	1	1/1	1			1	1/1	1	1/1	1	1/1	1	1/DEL	0	1/1	1
NA19109	CYP2C9	1/1			1/1	1	1/1	1	1/1	1	1/1	1	1/1	1	1	1/1	1	1/1	1	1/1	1	1/1	1	1/1	1			1	1/1	1	1/1	1	1/1	1	1/1	1	1/1	1
NA19122	CYP2C9	1/11			1/11	1	1/11	1	1/11	1	1/11	1	1/11	1	1	1/11	1	1/11	1	1/11	1	1/11	1	1/11	1			1	1/11	1	1/11	1	1/11	1	1/11	1	1/11	1
NA19143	CYP2C9	1/6			1/6	1	1/6	1	1/6	1	1/1	0	1/1	0	1	1/6	1	1/6	1	1/6	1	1/1	0	1/1	0			1	1/6	1	1/6	1	1/6	1	1/1	0	1/1	0
NA19147	CYP2C9	1/1			1/1	1	1/1	1	1/1	1	1/1	1	1/1	1	1	1/1	1	1/1	1	1/1	1	1/1	1	1/1	1			1	1/1	1	1/1	1	1/1	1	1/1+1	0	1/1	1
NA19174	CYP2C9	1/1			1/1	1	1/1	1	1/1	1	1/1	1	1/1	1	1	1/1	1	1/1	1	1/1	1	1/1	1	1/1	1			1	1/1	1	1/1	1	1/1	1	1/1	1	1/1	1
NA19176	CYP2C9	1/1			1/1	1	1/1	1	1/1	1	1/1	1	1/1	1	1	1/1	1	1/1	1	1/1	1	1/1	1	1/1	1			1	1/1	1	1/1	1	1/1	1	1/1	1	1/1	1
NA19178	CYP2C9	5/9			5/9	1	5/9	1	5/9	1	5/9	1	5/9	1	1	5/9	1	5/9	1	5/9	1	5/9	1	5/9	1			1	5/9	1	5/9	1	5/9	1	5/9	1	5/9	1
NA19207	CYP2C9	1/1			1/1	1	1/1	1	1/1	1	1/1	1	1/1	1	1	1/1	1	1/1	1	1/1	1	1/1	1	1/1	1			1	1/1	1	1/1	1	1/1	1	1/1	1	1/1	1
NA19213	CYP2C9	1/6			1/6	1	1/6	1	1/6	1	1/1	0	1/1	0	1	1/6	1	1/6	1	1/6	1	1/1	0	1/1	0			1	1/6	1	1/6	1	1/6	1	1/1+1	0	1/1	0
NA19226	CYP2C9	1/8			1/8	1	1/8	1	1/8	1	1/8	1	1/1	0	1	1/8	1	1/8	1	1/8	1	1/8	1	1/8	1			1	1/8	1	1/8	1	1/8	1	1/8	1	1/8	1
NA19238	CYP2C9	1/1			1/1	1	1/1	1	1/1	1	1/1	1	1/1	1	0													0
NA19239	CYP2C9	1/1			1/1	1	1/1	1	1/1	1	1/1	1	1/1	1	1	1/1	1	1/1	1	1/1	1	1/1	1	1/1	1			1	1/1	1	1/1	1	1/1	1	1/1+1	0	1/1	1
NA19444	CYP2C9	1/1			1/1	1	1/1	1			1/1	1	1/1	1	0													0
NA19700	CYP2C9	1/9			1/9	1	1/9	1	1/9	1	1/9	1	1/9	1	0													0
NA19785	CYP2C9	1/1			1/1	1	1/1	1	1/1	1	1/1	1	1/1	1	0													0
NA19789	CYP2C9	1/2			1/2	1	1/2	1	1/2	1	1/2	1	1/2	1	1	1/2	1	1/2	1	1/2	1	1/2	1	1/2	1			1	1/2	1	1/2	1	1/2	1	1/2	1	1/2	1
NA19819	CYP2C9	1/1			1/1	1	1/1	1	1/1	1	1/1	1	1/1	1	1	1/1	1	1/1	1	1/1	1	1/1	1	1/1	1			1	1/1	1	1/1	1	1/1	1	1/1	1	1/1	1
NA19908	CYP2C9	1/5			1/5	1	1/5	1	1/1	0	1/5	1	1/5	1	1	1/5	1	1/5	1	1/5	1	1/5	1	1/5	1			1	1/5	1	1/5	1	1/5	1	1/5	1	1/5	1
NA19917	CYP2C9	1/1			1/1	1	1/1	1	1/1	1	1/1	1	1/1	1	1	1/1	1	1/1	1	1/1	1	1/1	1	1/1	1			1	1/1	1	1/1	1	1/1	1	1/1	1	1/1	1
NA19920	CYP2C9	1/1			1/1	1	1/1	1	1/1	1	1/1	1	1/1	1	1	1/1	1	1/1	1	1/1	1	1/1	1	1/1	1			1	1/1	1	1/1	1	1/1	1	1/1+1	0	1/1	1
NA20296	CYP2C9	1/1			1/1	1	1/1	1	1/1	1	1/1	1	1/1	1	1	1/1	1	1/1	1	1/1	1	1/1	1	1/1	1			1	1/1	1	1/1	1	1/1	1	1/1	1	1/1	1
NA20509	CYP2C9	1/1			1/1	1	1/1	1	1/1	1	1/1	1	1/1	1	1	1/1	1	1/1	1	1/1	1	1/1+1	0	1/1	1			1	1/1	1	1/1	1	1/1	1	1/1+1	0	1/1	1
NA21781	CYP2C9	1/1			1/1	1	1/1	1	1/1	1	1/1	1	1/1	1	1	1/1	1	1/1	1	1/1	1	1/1	1	1/1	1			1	1/1	1	1/1	1	1/1	1	1/1+1	0	1/1	1
NA23090	CYP2C9	1/1			1/1	1	1/1	1	1/1	1	1/1	1	1/1	1	0													0
NA23093	CYP2C9	1/1			1/1	1	1/1	1	1/1	1	1/1	1	1/1	1	0													0
NA23246	CYP2C9	1/1			1/1	1	1/1	1	1/1	1	1/1	1	1/1	1	0													1	1/1	1	1/1	1	1/1	1	1/1+1	0	1/1	1
NA23275	CYP2C9	5/5			5/5	1	5/5	1			5/5	1	5/5	1	0													1	5/5	1	5/5	1	5/5	1	5/5+5	0	5/5	1
NA23296	CYP2C9	1/1			1/1	1	1/1	1	1/1	1	1/1	1	1/1	1	0													0
NA23297	CYP2C9	1/1			1/1	1	1/1	1	1/1	1	1/1	1	1/1	1	0													0
NA23313	CYP2C9	1/1			1/1	1	1/1	1	1/1	1	1/1	1	1/1	1	0													0
NA23348	CYP2C9	1/2			1/2	1	1/2	1	1/1	0	1/2	1	1/2	1	0													1	1/2	1	1/2	1	1/2	1	1/2	1	1/2	1
NA23405	CYP2C9	1/3			1/3	1	1/3	1	1/3	1	1/1	0	1/3	1	0													0
NA23872	CYP2C9	1/2			1/2	1	1/2	1	1/1	0	1/2	1	1/2	1	0													0
NA23873	CYP2C9	2/2			2/2	1	2/2	1	2/2	1	2/2	1	1/1;1/2;2/2	1	0													0
NA23874	CYP2C9	1/1			1/1	1	1/1	1	1/1	1	1/1	1	1/1	1	0													1	1/1	1	1/1	1	1/1	1	1/1	1	1/1	1
NA23877	CYP2C9	1/1			1/1	1	1/1	1	1/1	1	1/1	1	1/1	1	0													0
NA23878	CYP2C9	1/1			1/1	1	1/1	1	1/1	1	1/1	1	1/1	1	0													0
NA23881	CYP2C9	1/2			1/2	1	1/2	1	1/2	1	1/2	1	1/2	1	0													0
NA24008	CYP2C9	1/1			1/1	1	1/1	1	1/1	1	1/1	1	1/1	1	0													1	1/1	1	1/1	1	1/1	1	1/1+1	0	1/1	1
NA24009	CYP2C9	1/1			1/1	1	1/1	1	1/1	1	1/1	1	1/1	1	0													0
NA24027	CYP2C9	1/2			1/2	1	1/2	1	1/2	1	1/2	1	1/2	1	0													1	1/2	1	1/2	1	1/2	1	1/2+2+2	0	1/2	1
NA24217	CYP2C9	1/2			1/2	1	1/2	1	1/1	0	1/2	1	2/2	0	0													0
HG00276	CYP2D6	4/5			4.021/5	1	4/5	1	108/4	0	4/4	0	1/1;1/2;1/4;1/5;1/10;1/34;1/38;1/39;1/65;1/74;2/2;2/4;2/5;2/10;2/34;2/38;2/39;2/65;2/74;4/4;4/5;4/10;4/34;4/38;4/39;4/65;4/74;5/5;5/10;5/34;5/38;5/39;5/65;5/74;5/4;10/10;10/34;10/38;10/39;10/65;10/74;10/4;34/34;34/38;34/39;34/65;34/74;34/10;34/4;38/38;38/39;38/65;38/74;38/10;38/4;39/39;39/65;39/74;39/10;39/4;65/65;65/74;65/10;65/4;74/74;74/10;74/4	1	1	4.021/5	1	4.021/5	1	5/4	1	4/5	1	5/4	1	4/5	1	1	4.021/5	1			5/4	1	4/5	1	5/4	1	5/68+4	0
HG00436	CYP2D6	2+2/71			2+2/71	1	2+2/71	1	2/2x165	0	2/71	0	2/71	0	1	2+2/71	1	2+2/71	1	71/2x2	1	[2,39,34]/71	0	2/71	0	2+2/71	1	0
HG00589	CYP2D6	1/21			1/21	1	1/21	1	No_call/No_call	0	1/2	0	1/2	0	1	1/21	1	1/21	1	1/21	1	1/2	0	1/2	0	1/21	1	1	1/21	1	21/27	0	1/21	1	1/1	0	1/2	0	1/21	1
HG01190	CYP2D6	68+4/5;4/68			4.021/68	1	4.021/68	1	4/4	0	4/4	0	1/1;1/2;1/4;1/5;1/10;1/34;1/38;1/39;1/65;1/74;2/2;2/4;2/5;2/10;2/34;2/38;2/39;2/65;2/74;4/4;4/5;4/10;4/34;4/38;4/39;4/65;4/74;5/5;5/10;5/34;5/38;5/39;5/65;5/74;5/4;10/10;10/34;10/38;10/39;10/65;10/74;10/4;34/34;34/38;34/39;34/65;34/74;34/10;34/4;38/38;38/39;38/65;38/74;38/10;38/4;39/39;39/65;39/74;39/10;39/4;65/65;65/74;65/10;65/4;74/74;74/10;74/4	0	1	4.021/68	1	4.021/68	1	5/68+4	1	5/68+4	1	4/4	0	5/68+4	1	1	4.021/68	1	10*/68	0	5/4	0	S1+1/4	0	5/4	0	5/68+4	1
NA06991	CYP2D6	1/4			4/139	0	1/4.021	1	39/39x131	0	1/4	1	1/1;1/2;1/4;1/5;1/10;1/34;1/38;1/39;1/65;1/74;2/2;2/4;2/5;2/10;2/34;2/38;2/39;2/65;2/74;4/4;4/5;4/10;4/34;4/38;4/39;4/65;4/74;5/5;5/10;5/34;5/38;5/39;5/65;5/74;5/4;10/10;10/34;10/38;10/39;10/65;10/74;10/4;34/34;34/38;34/39;34/65;34/74;34/10;34/4;38/38;38/39;38/65;38/74;38/10;38/4;39/39;39/65;39/74;39/10;39/4;65/65;65/74;65/10;65/4;74/74;74/10;74/4	1	1	1/4.021	1	1/4.021	1	1/4	1	1/4	1	1/4	1	1/4	1	1	1/4	1			1/10	0	1/68+4	0	1/4	1	1/4	1
NA06993	CYP2D6	4/35			4.021/35	1	4.021/35	1	139/65	0	4/35	1	35/4	1	0													0
NA07000	CYP2D6	9/35			9/35	1	9/35	1	No_call/No_call	0	1/35	0	1/35	0	1	9/35	1	9/35	1	35/9	1	[83,35,2,39,34]/1	0	1/35	0	35/9	1	1	9/35	1	9/35*	1	1/35	0	1/1	0	1/35	0	35/9	1
NA07019	CYP2D6	1/4			1/4.021	1	1/4.021	1	10/108	0	1/4	1	1/1;1/2;1/4;1/5;1/10;1/34;1/38;1/39;1/65;1/74;2/2;2/4;2/5;2/10;2/34;2/38;2/39;2/65;2/74;4/4;4/5;4/10;4/34;4/38;4/39;4/65;4/74;5/5;5/10;5/34;5/38;5/39;5/65;5/74;5/4;10/10;10/34;10/38;10/39;10/65;10/74;10/4;34/34;34/38;34/39;34/65;34/74;34/10;34/4;38/38;38/39;38/65;38/74;38/10;38/4;39/39;39/65;39/74;39/10;39/4;65/65;65/74;65/10;65/4;74/74;74/10;74/4	1	1	1/4.021	1	1/4.021	1	1/4	1	1/4	1	1/4	1	1/4	1	1	1/4.021*	1	1/4.021	1	10/74	0	1/4	1	1/4	1	None	0
NA07029	CYP2D6	1/35			1/35	1	1/35	1	No_call/No_call	0	1/35	1	1/35	1	1	1/35	1	1/35	1	1/35	1	1/35	1	1/35	1	1/35	1	1	1/35	1	1/35	1	1/5	0	5/35	0	1/35	1	1/35	1
NA07048	CYP2D6	1/4			1/4.021	1	1/4.021	1	No_call/No_call	0	1/4	1	1/1;1/2;1/4;1/5;1/10;1/34;1/38;1/39;1/65;1/74;2/2;2/4;2/5;2/10;2/34;2/38;2/39;2/65;2/74;4/4;4/5;4/10;4/34;4/38;4/39;4/65;4/74;5/5;5/10;5/34;5/38;5/39;5/65;5/74;5/4;10/10;10/34;10/38;10/39;10/65;10/74;10/4;34/34;34/38;34/39;34/65;34/74;34/10;34/4;38/38;38/39;38/65;38/74;38/10;38/4;39/39;39/65;39/74;39/10;39/4;65/65;65/74;65/10;65/4;74/74;74/10;74/4	1	0													0
NA07055	CYP2D6	4/4			4/4.021	1	4/4.021	1	4/4	1	4/4	1	1/1;1/2;1/4;1/5;1/10;1/34;1/38;1/39;1/65;1/74;2/2;2/4;2/5;2/10;2/34;2/38;2/39;2/65;2/74;4/4;4/5;4/10;4/34;4/38;4/39;4/65;4/74;5/5;5/10;5/34;5/38;5/39;5/65;5/74;5/4;10/10;10/34;10/38;10/39;10/65;10/74;10/4;34/34;34/38;34/39;34/65;34/74;34/10;34/4;38/38;38/39;38/65;38/74;38/10;38/4;39/39;39/65;39/74;39/10;39/4;65/65;65/74;65/10;65/4;74/74;74/10;74/4	1	1	4/4.021	1	4/4.021	1	4/4	1	4/4	1	4/4	1	4/4	1	1	4/4.021*	1	4/4.021	1	4/4	1	4/4	1	4/4	1	4/4	1
NA07056	CYP2D6	2/4			2/4.021	1	2/4.021	1	No_call/No_call	0	2/4	1	2/4	1	1	2/4.021	1	2/4.021	1	2/4	1	2/4	1	2/4	1	2/4	1	1	4K/139*	0	2/4	1	10/2	0	4/39	0	2/4	1	21/4	0
NA07348	CYP2D6	1/6			1/6	1	1/6	1	No_call/No_call	0	1/1	0	1/1;1/2;1/5;1/34;1/38;1/39;2/2;2/5;2/34;2/38;2/39;5/5;5/34;5/38;5/39;34/34;34/38;34/39;38/38;38/39;39/39	0	1	1/6	1	1/6	1	1/6	1	1/6	1	1/6	1	1/6	1	1	1/6	1	1/1	0	1/1	0	6/1	1	1/6	1	None	0
NA07357	CYP2D6	1/6			1/6	1	1/6	1	1/1x115	0	1/1	0	1/1	0	1	1/6	1	1/6	1	1/6	1	1/6	1	1/6	1	1/6	1	1	1*/6	1	1/6	1	1/6	1	1/6	1	1/6	1	None	0
NA07439	CYP2D6	4+4/41			4+4/41	1	4+4/41	1	10/41 ; 39/69 Duplication present	0	4/41	0	41/4	0	0													1	4+4/41	1	4+4/41	1	4/41	0	41+1/68+4	0	41/4	0	4+4/41	1
NA10831	CYP2D6	4/5			4.021/5	1	4/5	1	4/4	0	4/4	0	1/1;1/2;1/4;1/5;1/10;1/34;1/38;1/39;1/65;1/74;2/2;2/4;2/5;2/10;2/34;2/38;2/39;2/65;2/74;4/4;4/5;4/10;4/34;4/38;4/39;4/65;4/74;5/5;5/10;5/34;5/38;5/39;5/65;5/74;5/4;10/10;10/34;10/38;10/39;10/65;10/74;10/4;34/34;34/38;34/39;34/65;34/74;34/10;34/4;38/38;38/39;38/65;38/74;38/10;38/4;39/39;39/65;39/74;39/10;39/4;65/65;65/74;65/10;65/4;74/74;74/10;74/4	1	1	4.021/5	1	4/5	1	5/4	1	4/5	1	5/4	1	4/5	1	1	4.021/5	1	4.021/5	1	5/4	1	4/5	1	5/4	1	4/5	1
NA10838	CYP2D6	2/4			2/4.021	1	2/4.021	1	139/65	0	2/4	1	2/4	1	0													0
NA10846	CYP2D6	1/4			1/4.021	1	1/4.021	1	No_call/No_call	0	1/4	1	1/1;1/2;1/4;1/5;1/10;1/34;1/38;1/39;1/65;1/74;2/2;2/4;2/5;2/10;2/34;2/38;2/39;2/65;2/74;4/4;4/5;4/10;4/34;4/38;4/39;4/65;4/74;5/5;5/10;5/34;5/38;5/39;5/65;5/74;5/4;10/10;10/34;10/38;10/39;10/65;10/74;10/4;34/34;34/38;34/39;34/65;34/74;34/10;34/4;38/38;38/39;38/65;38/74;38/10;38/4;39/39;39/65;39/74;39/10;39/4;65/65;65/74;65/10;65/4;74/74;74/10;74/4	1	0													0
NA10847	CYP2D6	1/41			1/41	1	1/41	1	No_call/No_call	0	1/41	1	1/41	1	1	1/41	1	1/41	1	39/41	0	1/41	1	1/41	1	1/41	1	1	1/41	1	63/67;63/78	0	1/41	1	1/41	1	1/41	1	1/41	1
NA10851	CYP2D6	1/4			1/4.021	1	1/4.021	1	10/139	0	1/4	1	1/1;1/2;1/4;1/5;1/10;1/34;1/38;1/39;1/65;1/74;2/2;2/4;2/5;2/10;2/34;2/38;2/39;2/65;2/74;4/4;4/5;4/10;4/34;4/38;4/39;4/65;4/74;5/5;5/10;5/34;5/38;5/39;5/65;5/74;5/4;10/10;10/34;10/38;10/39;10/65;10/74;10/4;34/34;34/38;34/39;34/65;34/74;34/10;34/4;38/38;38/39;38/65;38/74;38/10;38/4;39/39;39/65;39/74;39/10;39/4;65/65;65/74;65/10;65/4;74/74;74/10;74/4	1	1	1/4.021	1	1/4.021	1	1/4	1	1/4	1	1/4	1	1/4	1	1	1*/4.021	1	1/4.021	1	139/5	0	1/4	1	1/4	1	4/13	0
NA10854	CYP2D6	1/4			1/4.021	1	1/4.021	1	No_call/No_call	0	1/4	1	1/1;1/2;1/4;1/5;1/10;1/34;1/38;1/39;1/65;1/74;2/2;2/4;2/5;2/10;2/34;2/38;2/39;2/65;2/74;4/4;4/5;4/10;4/34;4/38;4/39;4/65;4/74;5/5;5/10;5/34;5/38;5/39;5/65;5/74;5/4;10/10;10/34;10/38;10/39;10/65;10/74;10/4;34/34;34/38;34/39;34/65;34/74;34/10;34/4;38/38;38/39;38/65;38/74;38/10;38/4;39/39;39/65;39/74;39/10;39/4;65/65;65/74;65/10;65/4;74/74;74/10;74/4	1	1	1/4.021	1	1/4	1	1/4	1	1/4	1	1/4	1	1/4	1	1	1*/4	1	1*/4	1	1/4	1	1/4	1	1/4	1	1/4	1
NA10855	CYP2D6	1/68+4			1/68+4.021	1	1/68+4.021	1	No_call/No_call	0	1/4	0	1/1;1/2;1/4;1/5;1/10;1/34;1/38;1/39;1/65;1/74;2/2;2/4;2/5;2/10;2/34;2/38;2/39;2/65;2/74;4/4;4/5;4/10;4/34;4/38;4/39;4/65;4/74;5/5;5/10;5/34;5/38;5/39;5/65;5/74;5/4;10/10;10/34;10/38;10/39;10/65;10/74;10/4;34/34;34/38;34/39;34/65;34/74;34/10;34/4;38/38;38/39;38/65;38/74;38/10;38/4;39/39;39/65;39/74;39/10;39/4;65/65;65/74;65/10;65/4;74/74;74/10;74/4	0	0													0
NA10856	CYP2D6	1/5			1/5	1	1/5	1	1/1	0	1/1	0	1/1	0	0													0
NA10859	CYP2D6	1/2			1/2	1	1/2	1	No_call/No_call	0	1/2	1	1/2	1	0													0
NA10865	CYP2D6	1/41			1/41	1	1/41	1	No_call/No_call	0	1/41	1	1/41	1	0													0
NA11832	CYP2D6	1/68+4			1/68+4.021	1	1/68+4.021	1	139/4	0	1/4	0	1/1;1/2;1/4;1/5;1/10;1/34;1/38;1/39;1/65;1/74;2/2;2/4;2/5;2/10;2/34;2/38;2/39;2/65;2/74;4/4;4/5;4/10;4/34;4/38;4/39;4/65;4/74;5/5;5/10;5/34;5/38;5/39;5/65;5/74;5/4;10/10;10/34;10/38;10/39;10/65;10/74;10/4;34/34;34/38;34/39;34/65;34/74;34/10;34/4;38/38;38/39;38/65;38/74;38/10;38/4;39/39;39/65;39/74;39/10;39/4;65/65;65/74;65/10;65/4;74/74;74/10;74/4	0	1	1/68+4.021	1	1/68+4.021	1	1/68+4	1	1/68+4	1	1/4	0	1/68+4	1	1	1/4.021	0	39+131*/68+4.021	0	1/4	0	S1+1/4	0	1/4	0	1/68+4	1
NA11839	CYP2D6	1/2			1/2	1	1/2	1	No_call/No_call	0	1/2	1	1/2	1	1	1/2	1	1/2	1	1/2	1	1/2	1	1/2	1	1/2	1	1	1/2	1	1*/2	1	1/2	1	[2,39,34]/1	1	1/2	1	None	0
NA11881	CYP2D6	2/3			2/3	1	2/3	1	2/39	0	1/2	0	1/2	0	0													0
NA11993	CYP2D6	1/9			1/9	1	1/9	1	121/34	0	1/1	0	1/1;1/2;1/5;1/34;1/38;1/39;2/2;2/5;2/34;2/38;2/39;5/5;5/34;5/38;5/39;34/34;34/38;34/39;38/38;38/39;39/39	0	1	1/9	1	1/9	1	1/9	1	1/1	0	1/1	0	1/9	1	1	1/9+9*	0	9+9/131*	0	1/9	1	1/1+1	0	1/1	0	None	0
NA12003	CYP2D6	4/35			4.021/35	1	4.021/35	1	No_call/No_call	0	4/35	1	35/4	1	1	4.021/35	1	4/35	1	35/4	1	4/35	1	35/4	1	35/4	1	1	4.021*/35	1	4/35	1	4/5	0	4/39	0	35/4	1	35/4	1
NA12006	CYP2D6	4/41			4/41	1	4/41	1	No_call/No_call	0	4/41	1	41/4	1	1	4/41	1	4/41	1	4/41	1	4/41	1	41/4	1	4/41	1	1	4/41	1	4/41	1	10/41	0	39/69	0	41/4	1	4/41	1
NA12145	CYP2D6	1/4			1/4.021	1	1/4.021	1	No_call/No_call	0	1/4	1	1/1;1/2;1/4;1/5;1/10;1/34;1/38;1/39;1/65;1/74;2/2;2/4;2/5;2/10;2/34;2/38;2/39;2/65;2/74;4/4;4/5;4/10;4/34;4/38;4/39;4/65;4/74;5/5;5/10;5/34;5/38;5/39;5/65;5/74;5/4;10/10;10/34;10/38;10/39;10/65;10/74;10/4;34/34;34/38;34/39;34/65;34/74;34/10;34/4;38/38;38/39;38/65;38/74;38/10;38/4;39/39;39/65;39/74;39/10;39/4;65/65;65/74;65/10;65/4;74/74;74/10;74/4	1	1	1/4.021	1	1/4.021	1	1/4	1	1/4	1	1/4	1	1/4	1	1	1/4.021	1	4.021/131	0	139/5	0	1/4	1	1/4	1	1/4	1
NA12156	CYP2D6	1/4			1/4.021	1	1/4.021	1	No_call/No_call	0	1/4	1	1/1;1/2;1/4;1/5;1/10;1/34;1/38;1/39;1/65;1/74;2/2;2/4;2/5;2/10;2/34;2/38;2/39;2/65;2/74;4/4;4/5;4/10;4/34;4/38;4/39;4/65;4/74;5/5;5/10;5/34;5/38;5/39;5/65;5/74;5/4;10/10;10/34;10/38;10/39;10/65;10/74;10/4;34/34;34/38;34/39;34/65;34/74;34/10;34/4;38/38;38/39;38/65;38/74;38/10;38/4;39/39;39/65;39/74;39/10;39/4;65/65;65/74;65/10;65/4;74/74;74/10;74/4	1	1	1/4.021	1	4/139	0	1/4	1	1/4	1	1/4	1	1/4	1	1	1*/4*	1	4/131*	0	5/4	0	S1+1/4	0	1/4	1	1/4	1
NA12236	CYP2D6	1/4			1/4.021	1	1/4	1	No_call/No_call	0	1/4	1	1/1;1/2;1/4;1/5;1/10;1/34;1/38;1/39;1/65;1/74;2/2;2/4;2/5;2/10;2/34;2/38;2/39;2/65;2/74;4/4;4/5;4/10;4/34;4/38;4/39;4/65;4/74;5/5;5/10;5/34;5/38;5/39;5/65;5/74;5/4;10/10;10/34;10/38;10/39;10/65;10/74;10/4;34/34;34/38;34/39;34/65;34/74;34/10;34/4;38/38;38/39;38/65;38/74;38/10;38/4;39/39;39/65;39/74;39/10;39/4;65/65;65/74;65/10;65/4;74/74;74/10;74/4	1	0													1	1/4.021;4/139	1	4/131*	0	10/74	0	1/4	1	1/4	1	1/4	1
NA12336	CYP2D6	5/41			5/41	1	5/41	1	41/41x68	0	41/41	0	41/41	0	0													0
NA12375	CYP2D6	1/1			1/1	1	1/1	1	1/1x116	0	1/1	1	1/1	1	0													0
NA12717	CYP2D6	1/1			1/1	1	1/1	1	1/1x114	0	1/1	1	1/1;1/2;1/5;1/34;1/38;1/39;2/2;2/5;2/34;2/38;2/39;5/5;5/34;5/38;5/39;34/34;34/38;34/39;38/38;38/39;39/39	1	1	1/1	1	1/1	1	1/1	1	1/1	1	1/1	1	1/1	1	1	1/1*	1	1/1*	1	1/1	1	1/1	1	1/1	1	1/1	1
NA12753	CYP2D6	2/3			2/3	1	2/3	1	No_call/No_call	0	1/2	0	1/2	0	0													0
NA12813	CYP2D6	2/4			2/4.021	1	2/4.021	1	2/39	0	2/4	1	2/4	1	1	2/4.021	1	2/4.021	1	2/4	1	2/4	1	2/4	1	2/4	1	1	2/4.021	1	2/4	1	2/4	1	S1+1/4	0	2/4	1	2/4	1
NA12815	CYP2D6	2/41			2/41	1	2/41	1	No_call/No_call	0	2/41	1	2/41	1	0													0
NA12873	CYP2D6	1/5			1/5	1	1/5	1	1/1x71	0	1/1	0	1/1;1/2;1/5;1/34;1/38;1/39;2/2;2/5;2/34;2/38;2/39;5/5;5/34;5/38;5/39;34/34;34/38;34/39;38/38;38/39;39/39	1	1	1/5	1	5/83	0	5/1	1	1/5	1	1/5	1	1/5	1	1	1/5	1	1/5	1	5/1	1	1/5	1	1/5	1	1/5	1
NA12878	CYP2D6	3/68+4			3/68+4.021	1	3/68+4.021	1	No_call/No_call	0	1/4	0	1/1;1/2;1/4;1/5;1/10;1/34;1/38;1/39;1/65;1/74;2/2;2/4;2/5;2/10;2/34;2/38;2/39;2/65;2/74;4/4;4/5;4/10;4/34;4/38;4/39;4/65;4/74;5/5;5/10;5/34;5/38;5/39;5/65;5/74;5/4;10/10;10/34;10/38;10/39;10/65;10/74;10/4;34/34;34/38;34/39;34/65;34/74;34/10;34/4;38/38;38/39;38/65;38/74;38/10;38/4;39/39;39/65;39/74;39/10;39/4;65/65;65/74;65/10;65/4;74/74;74/10;74/4	0	0													0
NA12892	CYP2D6	2/3			2/3	1	2/3	1	2/34	0	1/2	0	1/2	0	0													0
NA15245	CYP2D6	4+4/4			4.021+4/4	1	4+4/4	1	No_call/No_call	0	4/4	0	1/1;1/2;1/4;1/5;1/10;1/34;1/38;1/39;1/65;2/2;2/4;2/5;2/10;2/34;2/38;2/39;2/65;4/4;4/5;4/10;4/34;4/38;4/39;4/65;5/5;5/10;5/34;5/38;5/39;5/65;5/4;10/10;10/34;10/38;10/39;10/65;10/4;34/34;34/38;34/39;34/65;34/10;34/4;38/38;38/39;38/65;38/10;38/4;39/39;39/65;39/10;39/4;65/65;65/10;65/4	0	0													1	4+4/4*	1	4+4*/67;4+4*/78	0	4/4x2	1	4/4+4	1	4/4	0	None	0
NA17012	CYP2D6	5/10*			5/10*	1	5/10*	1	10/10	0	10/10	0	1/1;1/2;1/5;1/10;1/34;1/38;1/39;1/43;1/65;2/2;2/5;2/10;2/34;2/38;2/39;2/43;2/65;5/5;5/10;5/34;5/38;5/39;5/43;5/65;10/10;10/34;10/38;10/39;10/43;10/65;34/34;34/38;34/39;34/43;34/65;34/10;38/38;38/39;38/43;38/65;38/10;39/39;39/43;39/65;39/10;43/43;43/65;43/10;65/65;65/10	1	0													0
NA17061	CYP2D6	1/2			1/2	1	1/2	1	No_call/No_call	0	1/2	1	1/2	1	0													0
NA17074	CYP2D6	1/2			1/2	1	1/2	1	2/2x119	0	1/2	1	1/2	1	0													1	1/2	1	1/2	1	1/2	1	[83,2,39,34]/1	1	1/2	1	1/2	1
NA17102	CYP2D6	1/40			1/40	1	1/40	1	No_call/No_call	0	1/17	0	1/17	0	0													1	1/40	1	1*/5	0	1/40	1	1/17	0	1/17	0	1/40	1
NA17204	CYP2D6	1/35			1/35	1	1/35	1	No_call/No_call	0	1/35	1	1/35	1	0													1	1/35	1	1/35	1	1/35	1	1/35	1	1/35	1	1/35	1
NA17227	CYP2D6	1/9			1/9	1	1/9	1	34/34x110	0	1/1	0	1/1;1/2;1/5;1/34;1/38;1/39;2/2;2/5;2/34;2/38;2/39;5/5;5/34;5/38;5/39;34/34;34/38;34/39;38/38;38/39;39/39	0	0													1	1/9	1	1/9+9	0	1/9	1	1/1	0	1/1	0	1/9	1
NA17234	CYP2D6	1/41			1/41	1	1/41	1	No_call/No_call	0	1/41	1	1/41	1	0													1	1/41	1	32+83/67;32+78/83	0	1/41	1	[83,41,119,2,39,34]/1	1	1/41	1	1/41	1
NA17235	CYP2D6	1/5			5/139	0	1/5	1	1/1x61	0	1/1	0	1/1;1/2;1/5;1/34;1/38;1/39;2/2;2/5;2/34;2/38;2/39;5/5;5/34;5/38;5/39;34/34;34/38;34/39;38/38;38/39;39/39	1	0													1	5/15*	0	1/5	1	5/139	0	1/13C	0	1/1	0	1/5	1
NA17244	CYP2D6	2+2/4+4 (+hyb)			2+2/4+4	1	2+2/68+4+80	0	No_call/No_call	0	2/4	0	2/4	0	0													1	4+4/21+39	0	4K+4N+86*/21+67*;4K+4N+67*/21+131*	0	2/4x2	0	2+2+2+2/68+4	0	2/4	0	None	0
NA17288	CYP2D6	1/1			1/1	1	1/1	1	121/34	0	1/1	1	1/1;1/2;1/5;1/34;1/38;1/39;2/2;2/5;2/34;2/38;2/39;5/5;5/34;5/38;5/39;34/34;34/38;34/39;38/38;38/39;39/39	1	0													0
NA17290	CYP2D6	1/41			1/41	1	1/41	1	No_call/No_call	0	1/41	1	1/41	1	0													0
NA17448	CYP2D6	1/28			1/28	1	1/28	1	No_call/No_call	0	1/28	1	1/2	0	0													1	1/28	1	27/28	0	1/28	1	1/28	1	1/2	0	1/28	1
NA17454	CYP2D6	1+1/2+2			1+1/2+2	1	1+1/2+2	1	No_call/No_call	0	1/2	0	1/2	0	0													1	1+34/2+2	0	1+2/34+121	0	1/2	0	1+1+1/2	0	1/2	0	None	0
NA17641	CYP2D6	2/35			2/35	1	2/35	1	2/2x117	0	2/35	1	2/35	1	0													1	2/35	1	2/35	1	5/35	0	2/2	0	2/35	1	2/35	1
NA17642	CYP2D6	1/1			1/1	1	1/1	1	121/34	0	1/1	1	1/1;1/2;1/5;1/34;1/38;1/39;2/2;2/5;2/34;2/38;2/39;5/5;5/34;5/38;5/39;34/34;34/38;34/39;38/38;38/39;39/39	1	0													1	1/1	1	1/1	1	1/1	1	1/1	1	1/1	1	1/1	1
NA17657	CYP2D6	4/9			4.028/9	1	4.028/9	1	10/4	0	1/4	0	1/1;1/2;1/4;1/5;1/10;1/34;1/38;1/39;1/65;2/2;2/4;2/5;2/10;2/34;2/38;2/39;2/65;4/4;4/5;4/10;4/34;4/38;4/39;4/65;5/5;5/10;5/34;5/38;5/39;5/65;5/4;10/10;10/34;10/38;10/39;10/65;10/4;34/34;34/38;34/39;34/65;34/10;34/4;38/38;38/39;38/65;38/10;38/4;39/39;39/65;39/10;39/4;65/65;65/10;65/4	0	0													1	4.028/9*	1	4.028/9	1	4/9	1	1/4	0	1/4	0	4/9	1
NA17658	CYP2D6	1/2			1/2	1	1/2	1	No_call/No_call	0	1/2	1	1/2	1	0													1	1/2	1	2/139*	0	1/2	1	1/2	1	1/2	1	None	0
NA17660	CYP2D6	1/2			1/2	1	1/2	1	No_call/No_call	0	1/2	1	1/2	1	0													1	1/2	1	1/2	1	1/2	1	1/2	1	1/2	1	1/2	1
NA17673	CYP2D6	1/4			1/4.021	1	1/4.021	1	No_call/No_call	0	1/4	1	1/1;1/2;1/4;1/5;1/10;1/34;1/38;1/39;1/65;1/74;2/2;2/4;2/5;2/10;2/34;2/38;2/39;2/65;2/74;4/4;4/5;4/10;4/34;4/38;4/39;4/65;4/74;5/5;5/10;5/34;5/38;5/39;5/65;5/74;5/4;10/10;10/34;10/38;10/39;10/65;10/74;10/4;34/34;34/38;34/39;34/65;34/74;34/10;34/4;38/38;38/39;38/65;38/74;38/10;38/4;39/39;39/65;39/74;39/10;39/4;65/65;65/74;65/10;65/4;74/74;74/10;74/4	1	0													1	1*/4.021	1	4.021/131*	0	139/4	0	1/4	1	1/4	1	None	0
NA17679	CYP2D6	1/4			1/4.021	1	1/4.021	1	139/39	0	1/4	1	1/1;1/2;1/4;1/5;1/10;1/34;1/38;1/39;1/65;1/74;2/2;2/4;2/5;2/10;2/34;2/38;2/39;2/65;2/74;4/4;4/5;4/10;4/34;4/38;4/39;4/65;4/74;5/5;5/10;5/34;5/38;5/39;5/65;5/74;5/4;10/10;10/34;10/38;10/39;10/65;10/74;10/4;34/34;34/38;34/39;34/65;34/74;34/10;34/4;38/38;38/39;38/65;38/74;38/10;38/4;39/39;39/65;39/74;39/10;39/4;65/65;65/74;65/10;65/4;74/74;74/10;74/4	1	0													1	1/4	1	1*/4.021	1	1/4	1	1/4	1	1/4	1	1/4	1
NA17702	CYP2D6	1/35			1/35	1	1/35	1	No_call/No_call	0	1/35	1	1/35	1	0													1	1/35	1	1/35	1	1/35	1	1/35	1	1/35	1	1/35	1
NA18484	CYP2D6	1/17			1/17	1	1/17	1	No_call/No_call	0	1/17	1	1/17	1	1	1/17	1	63*/67;63*/78	0	1/17	1	1/17	1	1/17	1	1/17	1	1	1/17	1	1/17	1	1/2	0	1/17	1	1/17	1	1/17	1
NA18509	CYP2D6	2/17			2/17	1	2/17	1	No_call/No_call	0	2/17	1	2/17	1	1	2/17	1	2/17	1	17/2	1	2/17	1	2/17	1	17/2	1	1	2/17	1	2/17	1	5/17	0	2/17	1	2/17	1	17/2	1
NA18518	CYP2D6	17/29			17/29	1	17/29	1	17/29	1	17/29	1	17/29	1	1	17/29	1	17/29	1	17/29	1	17/29	1	17/29	1	17/29	1	1	17/29	1	17/29	1	17/29	1	S1+1/29	0	17/29	1	17/29	1
NA18519	CYP2D6	29/106			29/106	1	29/106	1	2/29	0	29/106	1	1/1;1/2;1/5;1/29;1/34;1/38;1/39;1/106;1/107;2/2;2/5;2/29;2/34;2/38;2/39;2/106;2/107;5/5;5/29;5/34;5/38;5/39;5/106;5/107;29/29;29/34;29/38;29/39;29/106;29/107;34/34;34/38;34/39;34/29;34/106;34/107;38/38;38/39;38/29;38/106;38/107;39/39;39/29;39/106;39/107;106/106;106/107;107/107	1	1	29/106	1	29/106	1	106/29	1	29/106	1	1/29	0	106/29	1	1	29*/106	1	29/106*	1	106/29	1	1/106	0	1/29	0	106/29	1
NA18524	CYP2D6	1/36+36+10			1+36/36+10	1	1+36/36+10	1	No_call/No_call	0	1/10	0	1/1;1/2;1/5;1/10;1/34;1/38;1/39;1/65;2/2;2/5;2/10;2/34;2/38;2/39;2/65;5/5;5/10;5/34;5/38;5/39;5/65;10/10;10/34;10/38;10/39;10/65;34/34;34/38;34/39;34/65;34/10;38/38;38/39;38/65;38/10;39/39;39/65;39/10;65/65;65/10	0	1	1+36/36+10	1	1+36/36+10	1	1/36x2+10	1	[36x3,10,39]/1	0	1/10	0	1/36+36+10	1	1	1/36+10*	0	1*+10/36+10	0	1/36+10	0	1+1/36+10	0	1/10	0	1_10_10_36	0
NA18526	CYP2D6	1/36+36+10			1+36/36+10	1	1+36/36+10	1	No_call/No_call	0	1/10	0	1/10	0	1	1+36/36+10	1	1+36/36+10	1	1/36x2+10	1	36+10/36+10	0	1/10	0	1/36+36+10	1	1	1+36/36+10	1	36+10/36+131	0	1/36+10	0	1/10	0	1/10	0	1/36+36+10	1
NA18540	CYP2D6	36+36+10/41			36+10/36+41	1	36+10/36+41	1	No_call/No_call	0	10/41	0	41/10	0	1	36+10/36+41	1	36+10/36+41	1	41/36+10	0	[41,119,2,39,34]/[36x3,10,39]	0	41/10	0	41/36+36+10	1	1	36+10/36+41	1	21+69/36+36	0	2/10x2	0	36+10/36+10	0	41/10	0	41/36+36+10	1
NA18544	CYP2D6	10/41			10/41	1	10/41	1	No_call/No_call	0	10/41	1	41/10	1	1	10/41	1	10/41	1	10/41	1	10/41	1	41/10	1	10/41	1	1	15*/69	0	10/41	1	69/5	0	39/69	0	41/10	1	10/41	1
NA18552	CYP2D6	1/14			1/14	1	1/14	1	No_call/No_call	0	1/14	1	1/2	0	1	1/14	1	1/14	1	1/14	1	1/14	1	1/2	0	1/14	1	1	1/14	1	1/14	1	1/14	1	1/14	1	1/2	0	1/14	1
NA18563	CYP2D6	1/36+10			1/36+10	1	1/36+10	1	No_call/No_call	0	1/10	0	1/1;1/2;1/5;1/10;1/34;1/38;1/39;1/65;2/2;2/5;2/10;2/34;2/38;2/39;2/65;5/5;5/10;5/34;5/38;5/39;5/65;10/10;10/34;10/38;10/39;10/65;34/34;34/38;34/39;34/65;34/10;38/38;38/39;38/65;38/10;39/39;39/65;39/10;65/65;65/10	0	0													0
NA18564	CYP2D6	2/36+10			2/36+10	1	2/36+10	1	No_call/No_call	0	2/10	0	2/10	0	1	2/36+10	1	2/36+10	1	2/36+10	1	[83,2,39,34]/[36,83,10,39]	0	2/10	0	2/36+10	1	1	10+10/63	0	10+10/63;2/36+10	1	10/2	0	S1+1/1+1	0	2/10	0	2/36+10	1
NA18565	CYP2D6	10/36+36			10/36+10	0	10/36+10	0	10/36x68+10x102	0	10/10	0	1/1;1/2;1/5;1/10;1/34;1/38;1/39;1/65;2/2;2/5;2/10;2/34;2/38;2/39;2/65;5/5;5/10;5/34;5/38;5/39;5/65;10/10;10/34;10/38;10/39;10/65;34/34;34/38;34/39;34/65;34/10;38/38;38/39;38/65;38/10;39/39;39/65;39/10;65/65;65/10	0	1	36/36+10	1	10/36+10	0	10/36x2	1	[36,83,10,39]/[36,83,10,39]	0	10/10	0	36/36+10	1	1	10/36+10	0	36/36+10	0	10/10	0	S1+1/1+1	0	10/10	0	None	0
NA18572	CYP2D6	36+10/41			36+10/41	1	36+10/41	1	No_call/No_call	0	10/41	0	41/10	0	0													0
NA18617	CYP2D6	36+10/36+10			36+10/36+10	1	36+10/36+10	1	10/36x58+10x149	0	10/10	0	1/1;1/2;1/5;1/10;1/34;1/38;1/39;1/65;2/2;2/5;2/10;2/34;2/38;2/39;2/65;5/5;5/10;5/34;5/38;5/39;5/65;10/10;10/34;10/38;10/39;10/65;34/34;34/38;34/39;34/65;34/10;38/38;38/39;38/65;38/10;39/39;39/65;39/10;65/65;65/10	0	1	36+10/36+10	1	36+10/36+10	1	36+10/36+10	1	36+10/36+10	1	10/10	0	36+10/36+10	1	1	36+10/36+10	1	36+10/36+10*	1	10/36+10	0	[83,10,39]/[83,10,39]	0	10/10	0	None	0
NA18855	CYP2D6	1/5			1/5	1	1/5	1	1/1x68	0	1/1	0	1/1	0	1	1/5	1	1/5	1	5/1	1	1/5	1	1/5	1	1/5	1	1	1/5	1	1/5	1	5/1	1	1/5	1	1/1	0	1/5	1
NA18861	CYP2D6	5/29			5/29	1	5/29	1	29/29x71	0	29/29	0	29/29	0	1	5/29	1	5/29	1	5/29	1	5/29	1	5/29	1	29/5	1	1	5/29	1	5/29	1	5/29	1	5/29	1	29/29	0	None	0
NA18868	CYP2D6	2/5			2/5	1	2/5	1	2/2x70	0	2/2	0	2/2	0	1	2/5	1	2/5	1	5/2	1	2/5	1	2/5	1	2/5	1	1	2/5	1	2/5	1	5/2	1	2/5	1	2/2	0	2/5	1
NA18873	CYP2D6	5/17			5/17	1	5/17	1	17/17x67	0	17/17	0	17/17	0	0													0
NA18942	CYP2D6	2/2			2/2	1	2/2	1	2/2x118	0	2/2	1	2/2	1	1	2/2	1	2/2	1	2/2	1	2/2	1	2/2	1	2/2	1	1	2/2	1	2/2	1	2/2	1	2/2	1	2/2	1	2/2	1
NA18945	CYP2D6	1/5			1/5	1	1/5	1	1/1x68	0	1/1	0	1/1;1/2;1/5;1/34;1/38;1/39;2/2;2/5;2/34;2/38;2/39;5/5;5/34;5/38;5/39;34/34;34/38;34/39;38/38;38/39;39/39	1	0													0
NA18952	CYP2D6	2/2			2/2	1	2/2	1	2/2x123	0	2/2	1	2/2	1	1	2/2	1	2/2	1	2/2	1	2/2	1	2/2	1	2/2	1	1	2/2	1	2/27*	0	2/2	1	2/2	1	2/2	1	2/2	1
NA18959	CYP2D6	2/36+10			2/36+10	1	2/36+10	1	No_call/No_call	0	2/10	0	2/10	0	1	2/36+10	1	2/36+10	1	2/36+10	1	[83,2,39,34]/[36,83,10,39]	0	2/10	0	2/36+10	1	1	2/36+10	1	2/36+10	1	10/2	0	[83,39]/[83,10,39]	0	2/10	0	2/36+10	1
NA18966	CYP2D6	1/2			1/2	1	1/2	1	2/2x119	0	1/2	1	1/2	1	1	1/2	1	1/2	1	1/2	1	1/2	1	1/2	1	1/2	1	1	1/2	1	5/34	0	1/2	1	1/S1+1	0	1/2	1	1/2	1
NA18973	CYP2D6	1/21			1/21	1	1/21	1	No_call/No_call	0	1/2	0	1/2	0	1	1/21	1	1/21	1			1/2	0	1/2	0	1/21	1	1	1/21	1	1/21	1	1/21	1	1/1	0	1/2	0	1/21	1
NA18980	CYP2D6	2/36+10			2/36+10	1	2/36+10	1	No_call/No_call	0	2/10	0	2/10	0	1	2/36+10	1	2/36+10	1	2/36+10	1	[83,2,39,34]/[36,83,10,39]	0	2/10	0	2/36+10	1	1	2/36+10	1	2/36+10	1	2/10x2	0	[83,39]/[83,10,39]	0	2/10	0	None	0
NA18992	CYP2D6	1/5			1/5	1	1/5	1	1/1x66	0	1/1	0	1/1	0	1	1/5	1	1/5	1	5/1	1	1/5	1	1/5	1	1/5	1	1	1*/5	1	1/5	1	5/1	1	1/5	1	1/5	1	1/5	1
NA19003	CYP2D6	1/1			1/1	1	1/1	1	1/1x119	0	1/1	1	1/1	1	1	1/1	1	1/1	1	1/1	1	1/1	1	1/1	1	1/1	1	1	1/1+1	1	1/131	0	1/1	1	1/1	1	1/1	1	1/1	1
NA19007	CYP2D6	1/1			1/1	1	1/1	1	1/1x116	0	1/1	1	1/1	1	1	1/1	1	1/1	1	1/1	1	1/1	1	1/1	1	1/1	1	1	1/1	1	1*/131	0	1/1	1	1/1	1	1/1	1	None	0
NA19035	CYP2D6	2/5			2/5	1	2/5	1	2/2x72	0	2/2	0	2/2	0	0													0
NA19095	CYP2D6	1/29			1/29	1	1/29	1	No_call/No_call	0	1/29	1	1/29	1	1	1/29	1	1/29	1	1/29	1	1/29	1	1/29	1	1/29	1	1	1/29	1	1/29	1	1/29	1	1/107	0	1/29	1	1/29	1
NA19109	CYP2D6	2+2/29			2+2/29	1	2+2/29	1	2/2x174	0	2/29	0	2/29	0	1	2+2/29	1	2+2/29	1	29/2x2	1	[2,39,34]/[29,2,39,34,107]	0	2/29	0	2+2/29	1	1	2+2/29	1	2+2/29	1	29/2x2	1	[2,39,34]/[29,2,39,34,107]	0	2/29	0	2+2/29	1
NA19122	CYP2D6	2/17			2/17	1	2/17	1	No_call/No_call	0	2/17	1	2/17	1	1	2/17	1	2/17	1	17/2	1	2/17	1	2/17	1	17/2	1	1	2/17	1	2/17	1	17/2	1	2/17	1	2/17	1	17/2	1
NA19143	CYP2D6	10/45			10/45	1	10/45	1	No_call/No_call	0	10/45	1	45/10	1	1	10/45	1	10/45	1	10/45	1	10/45	1	45/10	1	10/45	1	1	10/45	1	10/45	1	10/45	1	10/39	0	45/10	1	None	0
NA19147	CYP2D6	17/29			17/29	1	17/29	1	17/39	0	17/29	1	17/29	1	1	17/29	1	17/29	1	17/29	1	17/29	1	17/29	1	17/29	1	1	17/29	1	2*/17	0	29/5	0	2/17	0	17/17	0	17/29	1
NA19174	CYP2D6	4/40			4.021/40	1	4/40	1	No_call/No_call	0	4/17	0	17/4	0	1	4.021/40	1	4.021/40	1	4/40	1	4/17	0	17/4	0	4/40	1	1	4/17	0	4/40	1	4/40	1	17/68+4	0	17/4	0	None	0
NA19176	CYP2D6	1/2			1/2	1	1/2	1	2/2x118	0	1/2	1	1/2	1	1	1/2	1	1/2	1	1/2	1	1/2	1	1/2	1	1/2	1	1	1/2	1	1/2	1	1/2	1	1/2	1	1/2	1	1/2	1
NA19178	CYP2D6	1/1			1/1	1	1/1	1	1/1x115	0	1/1	1	1/1;1/2;1/5;1/34;1/38;1/39;2/2;2/5;2/34;2/38;2/39;5/5;5/34;5/38;5/39;34/34;34/38;34/39;38/38;38/39;39/39	1	1	1/1	1	1/1	1	1/1	1	1/1	1	1/1	1	1/1	1	1	1/1	1	1/1	1	1/1	1	1/1	1	1/1	1	None	0
NA19207	CYP2D6	2+2/10			2+2/10	1	2+2/10	1	2/2x168	0	2/10	0	2/10	0	1	2+2/10	1	2+2/10	1	10/2x2	1	[2,34]/[10,39]	0	2/10	0	10/2+2	1	1	2+2/10	1	2/10+21	0	39/2x2	0	1/10+0+0	0	2/10	0	None	0
NA19213	CYP2D6	1/1			1/1	1	1/1	1	121/34	0	1/1	1	1/1	1	1	1/1	1	1/1	1	1/1	1	1/1	1	1/1	1	1/1	1	1	1/1	1	1/1	1	1/1	1	1/1	1	1/1	1	None	0
NA19226	CYP2D6	2/2+2			2/2+2	1	2/2+2	1	2/2x170	0	2/2	0	2/2	0	1	2/2+2	1	2/2+2	1	2/2x2	1	2/2+2	1	2/2	0	2/2+2	1	1	2/2+2	1	2+2/15*+21	0	2/2x2	1	2/2+2	1	2/2	0	2+2/21	0
NA19238	CYP2D6	1/17			1/17	1	1/17	1	No_call/No_call	0	1/17	1	1/17	1	0													0
NA19239	CYP2D6	15/17			15/17	1	15/17	1	No_call/No_call	0	1/17	0	1/17	0	1	15/17	1	15/17	1	15/17	1	1/17	0	1/17	0	15/17	1	1	15/17	1	15/17	1	15/17	1	1/17	0	1/17	0	15/17	1
NA19444	CYP2D6	1/1			1/1	1	1/1	1	1/1x115	0	1/1	1	1/1;1/2;1/5;1/34;1/38;1/39;2/2;2/5;2/34;2/38;2/39;5/5;5/34;5/38;5/39;34/34;34/38;34/39;38/38;38/39;39/39	1	0													0
NA19700	CYP2D6	4/29			4.021/29	1	4.021/29	1	No_call/No_call	0	4/29	1	4/29	1	0													0
NA19785	CYP2D6	1/79+2			1/79+2	1	1/79+2	1	No_call/No_call	0	1/2	0	1/2	0	0													0
NA19789	CYP2D6	1/1			1/1	1	1/1	1	121/34	0	1/1	1	1/1;1/2;1/5;1/34;1/38;1/39;2/2;2/5;2/34;2/38;2/39;5/5;5/34;5/38;5/39;34/34;34/38;34/39;38/38;38/39;39/39	1	1	1/1	1	1/83	0	1/1	1	1/1	1	1/1	1	1/1	1	1	1/15	0	15/131*	0	1/1	1	1/1	1	1/1	1	1/1	1
NA19819	CYP2D6	2/4+4			2/4+4	1	2/4+4	1	No_call/No_call	0	2/4	0	2/4	0	1	2/4+4	1	2/4+4	1	2/4x2	1	[2,39,34]/[4,10,39]	0	2/4	0	2/4+4	1	1	2/4+4	1	2/4+10	0	2/4x2	1	39/[4,10,39]	0	2/4	0	2/4+4	1
NA19908	CYP2D6	1/46			1/46	1	1/46	1	No_call/No_call	0	1/46	1	43/45	0	1	1/46	1	1/46	1	43/45	0	1/46	1	43/45	0	1/46;43/45	1	1	1/46	1	1/46	1	43/5	0	1/1	0	43/45	0	None	0
NA19917	CYP2D6	1/40			1/40	1	1/40	1	No_call/No_call	0	1/17	0	1/17	0	1	1/40	1	1/40	1	1/40	1	1/17	0	1/17	0	1/40	1	1	1/40	1	1/40	1	1/40	1	1/17	0	1/17	0	1/40	1
NA19920	CYP2D6	1/4+4			1/4+4	1	1/4+4	1	No_call/No_call	0	1/4	0	1/1;1/2;1/4;1/5;1/10;1/34;1/38;1/39;1/65;2/2;2/4;2/5;2/10;2/34;2/38;2/39;2/65;4/4;4/5;4/10;4/34;4/38;4/39;4/65;5/5;5/10;5/34;5/38;5/39;5/65;5/4;10/10;10/34;10/38;10/39;10/65;10/4;34/34;34/38;34/39;34/65;34/10;34/4;38/38;38/39;38/65;38/10;38/4;39/39;39/65;39/10;39/4;65/65;65/10;65/4	0	1	1/4+4	1	1/4+4	1	1/4	0	[4,10,39]/1	0	1/4	0	1/4+4	1	1	1/4+4	1	1*+39/68+4+80	0	1/4	0	1/[4,10]	0	1/4	0	1/4+4	1
NA20296	CYP2D6	1/2			1/2	1	1/2	1	No_call/No_call	0	1/2	1	1/2	1	1	1/2	1	63/67;63/78	0	1/2	1	1/2	1	1/2	1	1/2	1	1	1/2	1	1/2	1	1/2	1	1/1	0	1/2	1	None	0
NA20509	CYP2D6	4/35			4.021/35	1	4.021/35	1	No_call/No_call	0	4/35	1	35/4	1	1	4.021/35	1	4/35	1	35/4	1	35/68+4	0	35/4	1	35/4	1	1	4/35	1	4/35	1	35/4	1	4/39	0	35/4	1	None	0
NA21781	CYP2D6	2+2/68+4			2+2/68+4.021	1	2+2/68+4.021	1	139/2	0	2/4	0	2/4	0	1	4/63+65	0	2+65/68+4.021	0	68+4/2x2	1	2+2/68+4	1	2/4	0	2+2/68+4	1	1	2/4*	0	2+21/68+4.021	0	139/65	0	2+2/68+4	1	2/4	0	None	0
NA23090	CYP2D6	1/36+10			1/36+10	1	1/36+10	1	1/39	0	1/10	0	1/1;1/2;1/5;1/10;1/34;1/38;1/39;1/65;2/2;2/5;2/10;2/34;2/38;2/39;2/65;5/5;5/10;5/34;5/38;5/39;5/65;10/10;10/34;10/38;10/39;10/65;34/34;34/38;34/39;34/65;34/10;38/38;38/39;38/65;38/10;39/39;39/65;39/10;65/65;65/10	0	0													0
NA23093	CYP2D6	1/36+10			1/36+10	1	1/36+10	1	No_call/No_call	0	1/10	0	1/10	0	0													0
NA23246	CYP2D6	10+10/36+10			10+10/36+10	1	10+10/36+10	1	10/36x11+10x200	0	10/10	0	1/1;1/2;1/5;1/10;1/34;1/38;1/39;1/65;2/2;2/5;2/10;2/34;2/38;2/39;2/65;5/5;5/10;5/34;5/38;5/39;5/65;10/10;10/34;10/38;10/39;10/65;34/34;34/38;34/39;34/65;34/10;38/38;38/39;38/65;38/10;39/39;39/65;39/10;65/65;65/10	0	0													1	10+10/10*	0	10+131*/36+10	0	10/10x2	0	10+0/36+10	0	10/10	0	None	0
NA23275	CYP2D6	1/40			1/40	1	1/40	1	No_call/No_call	0	1/17	0	1/1;1/2;1/5;1/17;1/34;1/38;1/39;2/2;2/5;2/17;2/34;2/38;2/39;5/5;5/17;5/34;5/38;5/39;17/17;17/34;17/38;17/39;34/34;34/38;34/39;38/38;38/39;39/39	0	0													1	1/40	1	1/40	1	34/40	0	[17,2,39,34]/1	0	1/17	0	1/40	1
NA23296	CYP2D6	2+2/4			2+2/4	1	2+2/4	1	No_call/No_call	0	2/4	0	2/4	0	0													0
NA23297	CYP2D6	10+10/17			10+10/17	1	10+10/17	1	No_call/No_call	0	10/17	0	17/10	0	0													0
NA23313	CYP2D6	2+2/2			2/2+2	1	2/2+2	1	2/2x180	0	2/2	0	2/2	0	0													0
NA23348	CYP2D6	7/35			7/35	1	7/35	1	No_call/No_call	0	7/35	1	7/35	1	0													1	7/35	1	7/35*	1	35/7	1	7/35	1	7/35	1	None	0
NA23405	CYP2D6	1/7			1/7	1	1/7	1	121/7	0	1/7	1	1/7	1	0													0
NA23872	CYP2D6	2/2			2/2	1	2/2	1	2/2x112	0	2/2	1	2/2	1	0													0
NA23873	CYP2D6	1/68+4			1/68+4.021	1	1/68+4.021	1	No_call/No_call	0	1/4	0	1/1;1/2;1/4;1/5;1/10;1/34;1/38;1/39;1/65;1/74;2/2;2/4;2/5;2/10;2/34;2/38;2/39;2/65;2/74;4/4;4/5;4/10;4/34;4/38;4/39;4/65;4/74;5/5;5/10;5/34;5/38;5/39;5/65;5/74;5/4;10/10;10/34;10/38;10/39;10/65;10/74;10/4;34/34;34/38;34/39;34/65;34/74;34/10;34/4;38/38;38/39;38/65;38/74;38/10;38/4;39/39;39/65;39/74;39/10;39/4;65/65;65/74;65/10;65/4;74/74;74/10;74/4	0	0													0
NA23874	CYP2D6	4/68+4			4.021/68+4	1	4.021/68+4	1	4/4	0	4/4	0	1/1;1/2;1/4;1/5;1/10;1/34;1/38;1/39;1/65;1/74;2/2;2/4;2/5;2/10;2/34;2/38;2/39;2/65;2/74;4/4;4/5;4/10;4/34;4/38;4/39;4/65;4/74;5/5;5/10;5/34;5/38;5/39;5/65;5/74;5/4;10/10;10/34;10/38;10/39;10/65;10/74;10/4;34/34;34/38;34/39;34/65;34/74;34/10;34/4;38/38;38/39;38/65;38/74;38/10;38/4;39/39;39/65;39/74;39/10;39/4;65/65;65/74;65/10;65/4;74/74;74/10;74/4	0	0													1	4.021/4	0	4.021/68+4	1	4/4	0	4/4	0	4/4	0	None	0
NA23877	CYP2D6	15/41			15/41	1	15/41	1	No_call/No_call	0	1/41	0	1/41	0	0													0
NA23878	CYP2D6	83(39)/4+4			4+4.021/39;4.021+4N/39	1	4.021+4N/39	1	No_call/No_call	0	1/4	0	1/1;1/2;1/4;1/5;1/10;1/34;1/38;1/39;1/65;1/74;2/2;2/4;2/5;2/10;2/34;2/38;2/39;2/65;2/74;4/4;4/5;4/10;4/34;4/38;4/39;4/65;4/74;5/5;5/10;5/34;5/38;5/39;5/65;5/74;5/4;10/10;10/34;10/38;10/39;10/65;10/74;10/4;34/34;34/38;34/39;34/65;34/74;34/10;34/4;38/38;38/39;38/65;38/74;38/10;38/4;39/39;39/65;39/74;39/10;39/4;65/65;65/74;65/10;65/4;74/74;74/10;74/4	0	0													0
NA23881	CYP2D6	2/41			2/41	1	2/41	1	2/2x119	0	2/41	1	2/41	1	0													0
NA24008	CYP2D6	1/68+4			1/68+4.021	1	1/68+4.021	1	No_call/No_call	0	1/4	0	1/1;1/2;1/4;1/5;1/10;1/34;1/38;1/39;1/65;1/74;2/2;2/4;2/5;2/10;2/34;2/38;2/39;2/65;2/74;4/4;4/5;4/10;4/34;4/38;4/39;4/65;4/74;5/5;5/10;5/34;5/38;5/39;5/65;5/74;5/4;10/10;10/34;10/38;10/39;10/65;10/74;10/4;34/34;34/38;34/39;34/65;34/74;34/10;34/4;38/38;38/39;38/65;38/74;38/10;38/4;39/39;39/65;39/74;39/10;39/4;65/65;65/74;65/10;65/4;74/74;74/10;74/4	0	0													1	1/68+4	0	1*/68+4.021	0	1/4	0	4N+4/68+4	0	1/4	0	1/68+4	1
NA24009	CYP2D6	29/29			29/29	1	29/29	1	29/29x119	0	29/29	1	1/1;1/2;1/5;1/29;1/34;1/38;1/39;1/107;2/2;2/5;2/29;2/34;2/38;2/39;2/107;5/5;5/29;5/34;5/38;5/39;5/107;29/29;29/34;29/38;29/39;29/107;34/34;34/38;34/39;34/29;34/107;38/38;38/39;38/29;38/107;39/39;39/29;39/107;107/107	1	0													0
NA24027	CYP2D6	2+2/6			2+2/6	1	2+2/6	1	2/2x164	0	1/2	0	1/2	0	0													1	2+2+2+2/6	0	2+2+6C/21+27	0	1/2x2	0	S1+1/1+1+1+1	0	1/2	0	None	0
NA24217	CYP2D6	2/41+41+41			2/41+41+41	1	2/41+41+41	1	No_call/No_call	0	2/41	0	2/41	0	0													0
HG00276	CYP2J2	1/1			1/1	1	1/1	1			1/1	1			1	1/1	1	1/1	1			1/1	1					1	1/1	1	1/1	1			1/1	1
HG00436	CYP2J2	1/1			1/1	1	1/1	1			1/1	1			1	1/1	1	1/1	1			1/1	1					0
HG00589	CYP2J2	1/1			1/1	1	1/1	1			1/1	1			1	1/1	1	1/1	1			1/1	1					1	1/1	1	1/1	1			1/1	1
HG01190	CYP2J2	1/7			1/7	1	1/7	1			1/1	0			1	1/7	1	1/7	1			1/1	0					1	1/7	1	1/7	1			1/1+1	0
NA06991	CYP2J2	1/1;1/7;7/7	1/7	1	1/7	1	1/7	1			1/1	0			1	1/7	1	1/7	1			1/1	0					1	1/7	1	1/7	1			1/1+1+1	0
NA07019	CYP2J2	1/1			1/1	1	1/1	1			1/1	1			1	1/1	1	1/1	1			1/1	1					1	1/1	1	1/1	1			1/1	1
NA07029	CYP2J2	1/1			1/1	1	1/1	1			1/1	1			1	1/1	1	1/1	1			1/1	1					1	1/1	1	1/1	1			1/1	1
NA07055	CYP2J2	1/1			1/1	1	1/1	1			1/1	1			1	1/1	1	1/1	1			1/1	1					1	1/1	1	1/1	1			1/1+1	0
NA07056	CYP2J2	1/1			1/1	1	1/1	1			1/1	1			1	1/1	1	1/1	1			1/1	1					1	1/1	1	1/1	1			1/1	1
NA07348	CYP2J2	1/1			1/1	1	1/1	1			1/1	1			1	1/1	1	1/1	1			1/1	1					1	1/1	1	1/1	1			1/1+1	0
NA07357	CYP2J2	1/1			1/1	1	1/1	1			1/1	1			1	1/1	1	1/1	1			1/1	1					1	1/1	1	1/1	1			1/1	1
NA07439	CYP2J2	1/1			1/1	1	1/1	1			1/1	1			0													1	1/1	1	1/1	1			1/1+1	0
NA10831	CYP2J2	1/1			1/1	1	1/1	1			1/1	1			1	1/1	1	1/1	1			1/1	1					1	1/1	1	1/1	1			1/1+1	0
NA10847	CYP2J2	1/1			1/1	1	1/1	1			1/1	1			1	1/1	1	1/1	1			1/1	1					1	1/1	1	1/1	1			1/1	1
NA10851	CYP2J2	1/1			1/1	1	1/1	1			1/1	1			1	1/1	1	1/1	1			1/1+1	0					1	1/1	1	1/1	1			1/1+1	0
NA10854	CYP2J2	1/1			1/1	1	1/1	1			1/1	1			1	1/1	1	1/1	1			1/1	1					1	1/1	1	1/1	1			1/1	1
NA11832	CYP2J2	1/1			1/1	1	1/1	1			1/1	1			1	1/1	1	1/1	1			1/1	1					1	1/1	1	1/1	1			1/1	1
NA11839	CYP2J2	1/1			1/1	1	1/1	1			1/1	1			1	1/1	1	1/1	1			1/1	1					1	1/1	1	1/1	1			1/1	1
NA11993	CYP2J2	1/1			1/1	1	1/1	1			1/1	1			1	1/1	1	1/1	1			1/1	1					1	1/1	1	1/1	1			1/1+1	0
NA12003	CYP2J2	1/1			1/1	1	1/1	1			1/1	1			1	1/1	1	1/1	1			1/1	1					1	1/1	1	1/1	1			1/1	1
NA12006	CYP2J2	1/1			1/1	1	1/1	1			1/1	1			1	1/1	1	1/1	1			1/1	1					1	1/1	1	1/1	1			1/1	1
NA12145	CYP2J2	1/1			1/1	1	1/1	1			1/1	1			1	1/1	1	1/1	1			1/1	1					1	1/1	1	1/1	1			1/1	1
NA12156	CYP2J2	1/1			1/1	1	1/1	1			1/1	1			1	1/1	1	1/1	1			1/1	1					1	1/1	1	1/1	1			1/1+1	0
NA12236	CYP2J2	1/1			1/1	1	1/1	1			1/1	1			0													1	1/1	1	1/1	1			1/1+1	0
NA12717	CYP2J2	1/1			1/1	1	1/1	1			1/1	1			1	1/1	1	1/1	1			1/1	1					1	1/1	1	1/1	1			1/1	1
NA12813	CYP2J2	1/1			1/1	1	1/1	1			1/1	1			1	1/1	1	1/1	1			1/1	1					1	1/1	1	1/1	1			1/1	1
NA12873	CYP2J2	1/1			1/1	1	1/1	1			1/1	1			1	1/1	1	1/1	1			1/1+1	0					1	1/1	1	1/1	1			1/1	1
NA12878	CYP2J2	1/1			1/1	1	1/1	1			1/1	1			0													0
NA15245	CYP2J2	1/1			1/1	1	1/1	1			1/1	1			0													1	1/1	1	1/1	1			1/1	1
NA17074	CYP2J2	1/1			1/1	1	1/1	1			1/1	1			0													1	1/1	1	1/1	1			1/1+1	0
NA17204	CYP2J2	1/1			1/1	1	1/1	1			1/1	1			0													1	1/1	1	1/1	1			1/1	1
NA17227	CYP2J2	1/1			1/1	1	1/1	1			1/1	1			0													1	1/1	1	1/1	1			1/1	1
NA17234	CYP2J2	1/7			1/7	1	1/7	1			1/1	0			0													1	1/7	1	1/7	1			1/1+1	0
NA17235	CYP2J2	1/1			1/1	1	1/1	1			1/1	1			0													1	1/1	1	1/1	1			1/1	1
NA17244	CYP2J2	1/1			1/1	1	1/1	1			1/1	1			0													1	1/1	1	1/1	1			1/1+1+1	0
NA17448	CYP2J2	1/1			1/1	1	1/1	1			1/1	1			0													1	1/1	1	1/1	1			1/1	1
NA17454	CYP2J2	1/1			1/1	1	1/1	1			1/1	1			0													1	1/1	1	1/1	1			1/1	1
NA17641	CYP2J2	1/1			1/1	1	1/1	1			1/1	1			0													1	1/1	1	1/1	1			1/1+1	0
NA17642	CYP2J2	1/1			1/1	1	1/1	1			1/1	1			0													1	1/1	1	1/1	1			1/1	1
NA17657	CYP2J2	1/1			1/1	1	1/1	1			1/1	1			0													1	1/1	1	1/1	1			1/1	1
NA17658	CYP2J2	1/1			1/1	1	1/1	1			1/1	1			0													1	1/1	1	1/1	1			1/1	1
NA17660	CYP2J2	1/1			1/1	1	1/1	1			1/1	1			0													1	1/1	1	1/1	1			1/1	1
NA17673	CYP2J2	1/7			1/7	1	1/7	1			1/1	0			0													1	1/7	1	1/7	1			1/1	0
NA17679	CYP2J2	1/1			1/1	1	1/1	1			1/1	1			0													1	1/1	1	1/1	1			1/1	1
NA17702	CYP2J2	1/1			1/1	1	1/1	1			1/1	1			0													1	1/1	1	1/1	1			1/1	1
NA18484	CYP2J2	1/7			1/7	1	1/7	1			1/1	0			1	1/7	1	1/7	1			1/1+1	0					1	1/7	1	1/7	1			1/1	0
NA18509	CYP2J2	1/1			1/1	1	1/1	1			1/1	1			1	1/1	1	1/1	1			1/1	1					1	1/1	1	1/1	1			1/1+1	0
NA18518	CYP2J2	1/1			1/1	1	1/1	1			1/1	1			1	1/1	1	1/1	1			1/1	1					1	1/1	1	1/1	1			1/1+1	0
NA18519	CYP2J2	1/1			1/1	1	1/1	1			1/1	1			1	1/1	1	1/1	1			1/1	1					1	1/1	1	1/1	1			1/1	1
NA18524	CYP2J2	1/1			1/1	1	1/1	1			1/1	1			1	1/1	1	1/1	1			1/1+1	0					1	1/1	1	1/1	1			1/1	1
NA18526	CYP2J2	1/1			1/1	1	1/1	1			1/1	1			1	1/1	1	1/1	1			1/1	1					1	1/1	1	1/1	1			1/1	1
NA18540	CYP2J2	1/1			1/1	1	1/1	1			1/1	1			1	1/1	1	1/1	1			1/1+1	0					1	1/1	1	1/1	1			1/1	1
NA18544	CYP2J2	1/1			1/1	1	1/1	1			1/1	1			1	1/1	1	1/1	1			1/1	1					1	1/1	1	1/1	1			1/1	1
NA18552	CYP2J2	1/1			1/1	1	1/1	1			1/1	1			1	1/1	1	1/1	1			1/1	1					1	1/1	1	1/1	1			1/1	1
NA18564	CYP2J2	1/1			1/1	1	1/1	1			1/1	1			1	1/1	1	1/1	1			1/1	1					1	1/1	1	1/1	1			1/1+1	0
NA18565	CYP2J2	1/1			1/1	1	1/1	1			1/1	1			1	1/1	1	1/1	1			1/1	1					1	1/1	1	1/1	1			1/1	1
NA18855	CYP2J2	1/1			1/1	1	1/1	1			1/1	1			1	1/1	1	1/1	1			1/1	1					1	1/1	1	1/1	1			1/1	1
NA18861	CYP2J2	1/7			1/7	1	1/7	1			1/1	0			1	1/7	1	1/7	1			1/1	0					1	1/7	1	1/7	1			1/1+1	0
NA18868	CYP2J2	1/1			1/1	1	1/1	1			1/1	1			1	1/1	1	1/1	1			1/1	1					1	1/1	1	1/1	1			1/1	1
NA18942	CYP2J2	1/1			1/1	1	1/1	1			1/1	1			1	1/1	1	1/1	1			1/1+1	0					1	1/1	1	1/1	1			1/1	1
NA18952	CYP2J2	1/1			1/1	1	1/1	1			1/1	1			1	1/1	1	1/1	1			1/1	1					1	1/1	1	1/1	1			1/1	1
NA18959	CYP2J2	1/1			1/1	1	1/1	1			1/1	1			1	1/1	1	1/1	1			1/1	1					1	1/1	1	1/1	1			1/1	1
NA18966	CYP2J2	1/1			1/1	1	1/1	1			1/1	1			1	1/1	1	1/1	1			1/1	1					1	1/1	1	1/1	1			1/1+1	0
NA18973	CYP2J2	1/1			1/1	1	1/1	1			1/1	1			1	1/1	1	1/1	1			1/1+1	0					1	1/1	1	1/1	1			1/1	1
NA18980	CYP2J2	1/1			1/1	1	1/1	1			1/1	1			1	1/1	1	1/1	1			1/1	1					1	1/1	1	1/1	1			1/1	1
NA18992	CYP2J2	1/1			1/1	1	1/1	1			1/1	1			1	1/1	1	1/1	1			1/1	1					1	1/1	1	1/1	1			1/1	1
NA19003	CYP2J2	1/1			1/1	1	1/1	1			1/1	1			1	1/1	1	1/1	1			1/1	1					1	1/1	1	1/1	1			1/1	1
NA19007	CYP2J2	1/1			1/1	1	1/1	1			1/1	1			1	1/1	1	1/1	1			1/1	1					1	1/1	1	1/1	1			1/1	1
NA19095	CYP2J2	1/1			1/1	1	1/1	1			1/1	1			1	1/1	1	1/1	1			1/1	1					1	1/1	1	1/1	1			1/1	1
NA19109	CYP2J2	1/1			1/1	1	1/1	1			1/1	1			1	1/1	1	1/1	1			1/1	1					1	1/1	1	1/1	1			1/1	1
NA19122	CYP2J2	1/1			1/1	1	1/1	1			1/1	1			1	1/1	1	1/1	1			1/1	1					1	1/1	1	1/1	1			1/1+1	0
NA19143	CYP2J2	1/1			1/1	1	1/1	1			1/1	1			1	1/1	1	1/1	1			1/1	1					1	1/1	1	1/1	1			1/1	1
NA19147	CYP2J2	1/1			1/1	1	1/1	1			1/1	1			1	1/1	1	1/1	1			1/1	1					1	1/1	1	1/1	1			1/1+1	0
NA19174	CYP2J2	1/1			1/1	1	1/1	1			1/1	1			1	1/1	1	1/1	1			1/1	1					1	1/1	1	1/1	1			1/1	1
NA19176	CYP2J2	1/1			1/1	1	1/1	1			1/1	1			1	1/1	1	1/1	1			1/1	1					1	1/1	1	1/1	1			1/1	1
NA19178	CYP2J2	1/7			1/7	1	1/7	1			1/1	0			1	1/7	1	1/7	1			1/1	0					1	1/7	1	1/7	1			1/1	0
NA19207	CYP2J2	1/1			1/1	1	1/1	1			1/1	1			1	1/1	1	1/1	1			1/1	1					1	1/1	1	1/1	1			1/1	1
NA19213	CYP2J2	1/7			1/7	1	1/7	1			1/1	0			1	1/7	1	1/7	1			1/1	0					1	1/7	1	1/7	1			1/1	0
NA19226	CYP2J2	1/1			1/1	1	1/1	1			1/1	1			1	1/1	1	1/1	1			1/1	1					1	1/1	1	1/1	1			1/1	1
NA19239	CYP2J2	1/1			1/1	1	1/1	1			1/1	1			1	1/1	1	1/1	1			1/1	1					1	1/1	1	1/1	1			1/1+1	0
NA19789	CYP2J2	1/1			1/1	1	1/1	1			1/1	1			1	1/1	1	1/1	1			1/1+1	0					1	1/1	1	1/1	1			1/1+1	0
NA19819	CYP2J2	1/1			1/1	1	1/1	1			1/1	1			1	1/1	1	1/1	1			1/1	1					1	1/1	1	1/1	1			1/1	1
NA19908	CYP2J2	1/1			1/1	1	1/1	1			1/1	1			1	1/1	1	1/1	1			1/1	1					1	1/1	1	1/1	1			1/1+1	0
NA19920	CYP2J2	1/7			1/7	1	1/7	1			1/1	0			1	1/7	1	1/7	1			1/1	0					1	1/7	1	1/7	1			1/1	0
NA20296	CYP2J2	1/1			1/1	1	1/1	1			1/1	1			1	1/1	1	1/1	1			1/1	1					1	1/1	1	1/1	1			1/1	1
NA20509	CYP2J2	1/1			1/1	1	1/1	1			1/1	1			1	1/1	1	1/1	1			1/1+1	0					1	1/1	1	1/1	1			1/1	1
NA23246	CYP2J2	1/1			1/1	1	1/1	1			1/1	1			0													1	1/1	1	1/1	1			1/1	1
NA23275	CYP2J2	1/1			1/1	1	1/1	1			1/1	1			0													1	1/1	1	1/1	1			1/1+1	0
NA23313	CYP2J2	1/7			1/7	1	1/7	1			1/1	0			0													0
NA23348	CYP2J2	1/1			1/1	1	1/1	1			1/1	1			0													1	1/1	1	1/1	1			1/1	1
NA23873	CYP2J2	1/1			1/1	1	1/1	1			1/1	1			0													0
NA23874	CYP2J2	1/1			1/1	1	1/1	1			1/1	1			0													1	1/1	1	1/1	1			1/1	1
NA23877	CYP2J2	1/1			1/1	1	1/1	1			1/1	1			0													0
NA24008	CYP2J2	1/1			1/1	1	1/1	1			1/1	1			0													1	1/1	1	1/1	1			1/1+1	0
NA24009	CYP2J2	7/7			7/7	1	7/7	1			1/1	0			0													0
NA24217	CYP2J2	1/1			1/1	1	1/1	1			1/1	1			0													0
HG00276	CYP2S1	1A/1C			1/1	1	1/1	1			1/1	1			1	1/1	1	1/1	1			1/1	1					1	1/1	1	1/1	1			1/1	1
HG00436	CYP2S1	1A/1A			1/1	1	1/1	1			1/1	1			1	1/1	1	1/1	1			1/1	1					0
HG00589	CYP2S1	1A/1A			1/1	1	1/1	1			1/1	1			1	1/1	1	1/1	1			1/1	1					1	1/1	1	1/1	1			1/1	1
HG01190	CYP2S1	1A/1A			1/1	1	1/1	1			1/1	1			1	1/1	1	1/1	1			1/1	1					1	1/1	1	1/1	1			1/1+1	0
NA06991	CYP2S1	1A/1A			1/1	1	1/1	1			1/1	1			1	1/1	1	1/1	1			1/1	1					1	1/1	1	1/1	1			1/1+1	0
NA07019	CYP2S1	1A/1E			1/1	1	1/1	1			1/1	1			1	1/1	1	1/1	1			1/1	1					1	1/1	1	1/1	1			1/1	1
NA07029	CYP2S1	1A/1C			1/1	1	1/1	1			1/1	1			1	1/1	1	1/1	1			1/1	1					1	1/1	1	1/1	1			1/DEL	0
NA07055	CYP2S1	1A/1A			1/1	1	1/1	1			1/1	1			1	1/1	1	1/1	1			1/1	1					1	1/1	1	1/1	1			1/1	1
NA07056	CYP2S1	1A/1A			1/1	1	1/1	1			1/1	1			1	1/1	1	1/1	1			1/1	1					1	1/1	1	1/1	1			1/1	1
NA07348	CYP2S1	1A/1C			1/1	1	1/1	1			1/1	1			1	1/1	1	1/1	1			1/1	1					1	1/1	1	1/1	1			1/1	1
NA07357	CYP2S1	1A/1A			1/1	1	1/1	1			1/1	1			1	1/1	1	1/1	1			1/1	1					1	1/1	1	1/1	1			1/1	1
NA07439	CYP2S1	1A/1A	1/3	1	1/1	0	1/3	1			1/1	0			0													1	1/3	1	1/3	1			1/3	1
NA10831	CYP2S1	1A/1A			1/1	1	1/1	1			1/1	1			1	1/1	1	1/1	1			1/1	1					1	1/1	1	1/1	1			1/1	1
NA10847	CYP2S1	1A/1A			1/1	1	1/1	1			1/1	1			1	1/1	1	1/1	1			1/1	1					1	1/1	1	1/1	1			1/1	1
NA10851	CYP2S1	1A/1A			1/1	1	1/1	1			1/1	1			1	1/1	1	1/1	1			1/1	1					1	1/1	1	1/1	1			1/1	1
NA10854	CYP2S1	1A/1A			1/1	1	1/1	1			1/1	1			1	1/1	1	1/1	1			1/1	1					1	1/1	1	1/1	1			1/1	1
NA11832	CYP2S1	1A/1A;1A/1E;1E/1E	1/1	1	1/1	1	1/1	1			1/1	1			1	1/1	1	1/1	1			1/1	1					1	1/1	1	1/1	1			1/1	1
NA11839	CYP2S1	1A/1A			1/1	1	1/1	1			1/1	1			1	1/1	1	1/1	1			1/1	1					1	1/1	1	1/1	1			1/1	1
NA11993	CYP2S1	1A/1A			1/1	1	1/1	1			1/1	1			1	1/1	1	1/1	1			1/1	1					1	1/1	1	1/1	1			1/1	1
NA12003	CYP2S1	1A/1A			1/1	1	1/1	1			1/1	1			1	1/1	1	1/1	1			1/1	1					1	1/1	1	1/1	1			1/1	1
NA12006	CYP2S1	1A/1A			1/1	1	1/1	1			1/1	1			1	1/1	1	1/1	1			1/1	1					1	1/1	1	1/1	1			1/1	1
NA12145	CYP2S1	1A/1A			1/1	1	1/1	1			1/1	1			1	1/1	1	1/1	1			1/1	1					1	1/1	1	1/1	1			1/1	1
NA12156	CYP2S1	1A/1A			1/1	1	1/1	1			1/1	1			1	1/1	1	1/1	1			1/1	1					1	1/1	1	1/1	1			1/1+1	0
NA12236	CYP2S1	1A/1E			1/1	1	1/1	1			1/1	1			0													1	1/1	1	1/1	1			1/1	1
NA12717	CYP2S1	1A/1A			1/1	1	1/1	1			1/1	1			1	1/1	1	1/1	1			1/1	1					1	1/1	1	1/1	1			1/1	1
NA12813	CYP2S1	1A/1A			1/1	1	1/1	1			1/1	1			1	1/1	1	1/1	1			1/1	1					1	1/1	1	1/1	1			1/1+1	0
NA12873	CYP2S1	1A/1A			1/1	1	1/1	1			1/1	1			1	1/1	1	1/1	1			1/1	1					1	1/1	1	1/1	1			1/1	1
NA12878	CYP2S1	1A/1A			1/1	1	1/1	1			1/1	1			0													0
NA15245	CYP2S1	1A/1A			1/1	1	1/1	1			1/1	1			0													1	1/1	1	1/1	1			1/1	1
NA17074	CYP2S1	1A/1A			1/1	1	1/1	1			1/1	1			0													1	1/1	1	1/1	1			1/1	1
NA17204	CYP2S1	1A/1A			1/1	1	1/1	1			1/1	1			0													1	1/1	1	1/1	1			1/1	1
NA17227	CYP2S1	1A/1A			1/1	1	1/1	1			1/1	1			0													1	1/1	1	1/1	1			1/1	1
NA17234	CYP2S1	1A/1A	1/3	1	1/1	0					1/1	0			0													1	1/3	1	1/3	1			1/3	1
NA17235	CYP2S1	1A/1A			1/1	1	1/1	1			1/1	1			0													1	1/1	1	1/1	1			1/1	1
NA17244	CYP2S1	1A/1A			1/1	1	1/1	1			1/1	1			0													1	1/1	1	1/1	1			1/1+1	0
NA17448	CYP2S1	1A/1A			1/1	1	1/1	1			1/1	1			0													1	1/1	1	1/1	1			1/1	1
NA17454	CYP2S1	1A/1A			1/1	1	1/1	1			1/1	1			0													1	1/1	1	1/1	1			1/1	1
NA17641	CYP2S1	1A/1A			1/1	1	1/1	1			1/1	1			0													1	1/1	1	1/1	1			1/1	1
NA17642	CYP2S1	1A/1C			1/1	1	1/1	1			1/1	1			0													1	1/1	1	1/1	1			1/1	1
NA17657	CYP2S1	1A/1A			1/1	1	1/1	1			1/1	1			0													1	1/1	1	1/1	1			1/1	1
NA17658	CYP2S1	1A/1A			1/1	1	1/1	1			1/1	1			0													1	1/1	1	1/1	1			1/1	1
NA17660	CYP2S1	1A/1A			1/1	1	1/1	1			1/1	1			0													1	1/1	1	1/1	1			1/1	1
NA17673	CYP2S1	1A/1A			1/1	1	1/1	1			1/1	1			0													1	1/1	1	1/1	1			1/1	1
NA17679	CYP2S1	1A/1A			1/1	1	1/1	1			1/1	1			0													1	1/1	1	1/1	1			1/1	1
NA17702	CYP2S1	1A/1A			1/1	1	1/1	1			1/1	1			0													1	1/1	1	1/1	1			1/1	1
NA18484	CYP2S1	1A/1A			1/1	1	1/1	1			1/1	1			1	1/1	1	1/1	1			1/1	1					1	1/1	1	1/1	1			1/1	1
NA18509	CYP2S1	1A/1A			1/1	1	1/1	1			1/1	1			1	1/1	1	1/1	1			1/1	1					1	1/1	1	1/1	1			1/1	1
NA18518	CYP2S1	1A/1C			1/1	1	1/1	1			1/1	1			1	1/1	1	1/1	1			1/1	1					1	1/1	1	1/1	1			1/1+1	0
NA18519	CYP2S1	1A/1C			1/1	1	1/1	1			1/1	1			1	1/1	1	1/1	1			1/1	1					1	1/1	1	1/1	1			1/1	1
NA18524	CYP2S1	1A/1A			1/1	1	1/1	1			1/1	1			1	1/1	1	1/1	1			1/1+1	0					1	1/1	1	1/1	1			1/1	1
NA18526	CYP2S1	1A/1A			1/1	1	1/1	1			1/1	1			1	1/1	1	1/1	1			1/1	1					1	1/1	1	1/1	1			1/1	1
NA18540	CYP2S1	1A/1A			1/1	1	1/1	1			1/1	1			1	1/1	1	1/1	1			1/1	1					1	1/1	1	1/1	1			1/1	1
NA18544	CYP2S1	1C/1C			1/1	1	1/1	1			1/1	1			1	1/1	1	1/1	1			1/1	1					1	1/1	1	1/1	1			1/1	1
NA18552	CYP2S1	1A/1A			1/1	1	1/1	1			1/1	1			1	1/1	1	1/1	1			1/1	1					1	1/1	1	1/1	1			1/1	1
NA18564	CYP2S1	1A/1A			1/1	1	1/1	1			1/1	1			1	1/1	1	1/1	1			1/1	1					1	1/1	1	1/1	1			1/1+1	0
NA18565	CYP2S1	1A/1A			1/1	1	1/1	1			1/1	1			1	1/1	1	1/1	1			1/1	1					1	1/1	1	1/1	1			1/1	1
NA18855	CYP2S1	1A/1A			1/1	1	1/1	1			1/1	1			1	1/1	1	1/1	1			1/1	1					1	1/1	1	1/1	1			1/1	1
NA18861	CYP2S1	1A/1A			1/1	1	1/1	1			1/1	1			1	1/1	1	1/1	1			1/1	1					1	1/1	1	1/1	1			1/1	1
NA18868	CYP2S1	1A/1C			1/1	1	1/1	1			1/1	1			1	1/1	1	1/1	1			1/1	1					1	1/1	1	1/1	1			1/1	1
NA18942	CYP2S1	1A/1A			1/1	1	1/1	1			1/1	1			1	1/1	1	1/1	1			1/1	1					1	1/1	1	1/1	1			1/1	1
NA18952	CYP2S1	1A/1C			1/1	1	1/1	1			1/1	1			1	1/1	1	1/1	1			1/1	1					1	1/1	1	1/1	1			1/1	1
NA18959	CYP2S1	1A/1A			1/1	1	1/1	1			1/1	1			1	1/1	1	1/1	1			1/1	1					1	1/1	1	1/1	1			1/1	1
NA18966	CYP2S1	1C/1C			1/1	1	1/1	1			1/1	1			1	1/1	1	1/1	1			1/1	1					1	1/1	1	1/1	1			1/1+1	0
NA18973	CYP2S1	1A/1A			1/1	1	1/1	1			1/1	1			1	1/1	1	1/1	1			1/1	1					1	1/1	1	1/1	1			1/1	1
NA18980	CYP2S1	1A/1C			1/1	1	1/1	1			1/1	1			1	1/1	1	1/1	1			1/1	1					1	1/1	1	1/1	1			1/1	1
NA18992	CYP2S1	1A/1A			1/1	1	1/1	1			1/1	1			1	1/1	1	1/1	1			1/1	1					1	1/1	1	1/1	1			1/1	1
NA19003	CYP2S1	1A/1C			1/1	1	1/1	1			1/1	1			1	1/1	1	1/1	1			1/1	1					1	1/1	1	1/1	1			1/1	1
NA19007	CYP2S1	1A/1A			1/1	1	1/1	1			1/1	1			1	1/1	1	1/1	1			1/1	1					1	1/1	1	1/1	1			1/1	1
NA19095	CYP2S1	1A/1A			1/1	1	1/1	1			1/1	1			1	1/1	1	1/1	1			1/1	1					1	1/1	1	1/1	1			1/1	1
NA19109	CYP2S1	1A/1A			1/1	1	1/1	1			1/1	1			1	1/1	1	1/1	1			1/1	1					1	1/1	1	1/1	1			1/1	1
NA19122	CYP2S1	1A/1A			1/1	1	1/1	1			1/1	1			1	1/1	1	1/1	1			1/1	1					1	1/1	1	1/1	1			1/1	1
NA19143	CYP2S1	1A/1A			1/1	1	1/1	1			1/1	1			1	1/1	1	1/1	1			1/1	1					1	1/1	1	1/1	1			1/1	1
NA19147	CYP2S1	1A/1A			1/1	1	1/1	1			1/1	1			1	1/1	1	1/1	1			1/1	1					1	1/1	1	1/1	1			1/1+1	0
NA19174	CYP2S1	1A/1A			1/1	1	1/1	1			1/1	1			1	1/1	1	1/1	1			1/1	1					1	1/1	1	1/1	1			1/1	1
NA19176	CYP2S1	1A/1A			1/1	1	1/1	1			1/1	1			1	1/1	1	1/1	1			1/1	1					1	1/1	1	1/1	1			1/1	1
NA19178	CYP2S1	1A/1C			1/1	1	1/1	1			1/1	1			1	1/1	1	1/1	1			1/1	1					1	1/1	1	1/1	1			1/1	1
NA19207	CYP2S1	1A/1A			1/1	1	1/1	1			1/1	1			1	1/1	1	1/1	1			1/1	1					1	1/1	1	1/1	1			1/1	1
NA19213	CYP2S1	1A/1A			1/1	1	1/1	1			1/1	1			1	1/1	1	1/1	1			1/1	1					1	1/1	1	1/1	1			1/1	1
NA19226	CYP2S1	1A/1A			1/1	1	1/1	1			1/1	1			1	1/1	1	1/1	1			1/1	1					1	1/1	1	1/1	1			1/1	1
NA19239	CYP2S1	1A/1C			1/1	1	1/1	1			1/1	1			1	1/1	1	1/1	1			1/1	1					1	1/1	1	1/1	1			1/1+1	0
NA19789	CYP2S1	1A/1A			1/1	1	1/1	1			1/1	1			1	1/1	1	1/1	1			1/1	1					1	1/1	1	1/1	1			1/1	1
NA19819	CYP2S1	1A/1A			1/1	1	1/1	1			1/1	1			1	1/1	1	1/1	1			1/1	1					1	1/1	1	1/1	1			1/1	1
NA19908	CYP2S1	1A/1A			1/1	1	1/1	1			1/1	1			1	1/1	1	1/1	1			1/1	1					1	1/1	1	1/1	1			1/1	1
NA19920	CYP2S1	1A/1C			1/1	1	1/1	1			1/1	1			1	1/1	1	1/1	1			1/1	1					1	1/1	1	1/1	1			1/1	1
NA20296	CYP2S1	1A/1A	1/3	1	1/1	0	1/1	0			1/1	0			1	1/3	1	1/3	1			1/3	1					1	1/3	1	1/3	1			1/3	1
NA20509	CYP2S1	1A/1A			1/1	1	1/1	1			1/1	1			1	1/1	1	1/1	1			1/1	1					1	1/1	1	1/1	1			1/1	1
NA23246	CYP2S1	1A/1A			1/1	1	1/1	1			1/1	1			0													1	1/1	1	1/1	1			1/1	1
NA23275	CYP2S1	1A/1A			1/1	1	1/1	1			1/1	1			0													1	1/1	1	1/1	1			1/1	1
NA23313	CYP2S1	1A/1A			1/1	1	1/1	1			1/1	1			0													0
NA23348	CYP2S1	1A/1A			1/1	1	1/1	1			1/1	1			0													1	1/1	1	1/1	1			1/1	1
NA23873	CYP2S1	1A/1A			1/1	1	1/1	1			1/1	1			0													0
NA23874	CYP2S1	1A/1C			1/1	1	1/1	1			1/1	1			0													1	1/1	1	1/1	1			1/DEL	0
NA23877	CYP2S1	1A/1A			1/1	1	1/1	1			1/1	1			0													0
NA24008	CYP2S1	1A/1A			1/1	1	1/1	1			1/1	1			0													1	1/1	1	1/1	1			1/1+1	0
NA24009	CYP2S1	1A/1A			1/1	1	1/1	1			1/1	1			0													0
NA24217	CYP2S1	1A/1C			1/1	1	1/1	1			1/1	1			0													0
HG00276	CYP3A4	1/2			1/2	1	1/2	1	1/2	1	1/2	1			1	1/2	1	1/2	1	1/2	1	1/2	1					1	1/2	1	1/2	1	1/2	1	1/2	1
HG00436	CYP3A4	1/1			1/1	1	1/1	1	1/1	1	1/1	1			1	1/1	1	1/1	1	1/1	1	1/1	1					0
HG00589	CYP3A4	1/1			1/1	1	1/1	1	1/1	1	1/1	1			1	1/1	1	1/1	1	1/1	1	1/1	1					1	1/1	1	1/1	1	1/1	1	1/1	1
HG01190	CYP3A4	1/1B			1/1	1	1/1	1	1G/1G	1	1/1	1			1	1/1	1	1/1	1	1G/1G	1	1/1	1					1	1/1	1	1/1	1	1G/1G	1	1/1+1	0
NA06991	CYP3A4	1/1			1/1	1	1/1	1	1/1	1	1/1	1			1	1/1	1	1/1	1	1/1	1	1/1	1					1	1/1	1	1/1	1	1/1	1	1/1+1+1	0
NA06993	CYP3A4	1/22			1/22	1	1/22	1	1/22	1	1/1	0			0													0
NA07000	CYP3A4	1/1			1/1	1	1/1	1	1/1G	1	1/1	1			1	1/1	1	1/1	1	1/1G	1	1/1+1	0					1	1/1	1	1/1	1	1/1G	1	1/1	1
NA07019	CYP3A4	1/1			1/1	1	1/1	1	1/1	1	1/1	1			1	1/1	1	1/1	1	1/1	1	1/1	1					1	1/1	1	1/1	1	1/1	1	1/1	1
NA07029	CYP3A4	1/1			1/1	1	1/1	1	1/1G	1	1/1	1			1	1/1	1	1/1	1	1/1G	1	1/1	1					1	1/1	1	1/1	1	1/1G	1	1/1	1
NA07048	CYP3A4	1/1			1/1	1	1/1	1	1/1	1	1/1	1			0													0
NA07055	CYP3A4	1/1			1/1	1	1/1	1	1/1	1	1/1	1			1	1/1	1	1/1	1	1/1	1	1/1	1					1	1/1	1	1/1	1	1/1	1	1/1+1	0
NA07056	CYP3A4	1/22			1/22	1	1/22	1	1/1	0	1/1	0			1	1/22	1	1/22	1	1/22	1	1/22	1					1	1/22	1	1/22	1	1/22	1	1/1	0
NA07348	CYP3A4	1/1			1/1	1	1/1	1	1/1	1	1/1	1			1	1/1	1	1/1	1	1/1	1	1/1	1					1	1/1	1	1/1	1	1/1	1	1/1+1	0
NA07357	CYP3A4	1/1			1/1	1	1/1	1			1/1	1			1	1/1	1	1/1	1	1/1	1	1/1	1					1	1/1	1	1/1	1	1/1	1	1/1	1
NA07439	CYP3A4	1/1			1/1	1	1/1	1	1G/1G	1	1/1	1			0													1	1/1	1	1/1	1	1G/1G	1	1/1+1	0
NA10831	CYP3A4	1/1			1/1	1	1/1	1	1/1	1	1/1	1			1	1/1	1	1/1	1	1/1	1	1/1	1					1	1/1	1	1/1	1	1/1	1	1/1+1	0
NA10838	CYP3A4	1/1			1/1	1	1/1	1	1/1	1	1/1	1			0													0
NA10846	CYP3A4	1/1			1/1	1	1/1	1			1/1	1			0													0
NA10847	CYP3A4	1/1			1/1	1	1/1	1	1/1	1	1/1	1			1	1/1	1	1/1	1	1/1	1	1/1+1	0					1	1/1	1	1/1	1	1/1	1	1/1	1
NA10851	CYP3A4	1/1			1/1	1	1/1	1	1/1	1	1/1	1			1	1/1	1	1/1	1	1/1	1	1/1+1	0					1	1/1	1	1/1	1	1/1	1	1/1+1	0
NA10854	CYP3A4	1/1B			1/1	1	1/1	1	1/1G	1	1/1	1			1	1/1	1	1/1	1	1/1G	1	1/1	1					1	1/1	1	1/1	1	1/1G	1	1/1+1	0
NA10855	CYP3A4	1/1			1/1	1	1/1	1	1/1	1	1/1	1			0													0
NA10856	CYP3A4	1/1			1/1	1	1/1	1	1/1G	1	1/1	1			0													0
NA10859	CYP3A4	1/1			1/1	1	1/1	1	1/1	1	1/1	1			0													0
NA10865	CYP3A4	1/1			1/1	1	1/1	1	1/1G	1	1/1	1			0													0
NA11832	CYP3A4	1/1			1/1	1	1/1	1	1/1	1	1/1	1			1	1/1	1	1/1	1	1/1	1	1/1+1	0					1	1/1	1	1/1	1	1/1	1	1/1+1	0
NA11839	CYP3A4	1/1B			1/1	1	1/1	1			1/1	1			1	1/1	1	1/1	1	1/1G	1	1/1	1					1	1/1	1	1/1	1	1/1G	1	1/1+1	0
NA11881	CYP3A4	1/1			1/1	1	1/1	1			1/1	1			0													0
NA11993	CYP3A4	1/1			1/1	1	1/1	1	1/1	1	1/1	1			1	1/1	1	1/1	1	1/1	1	1/1	1					1	1/1	1	1/1	1	1/1	1	1/1+1	0
NA12003	CYP3A4	1/1B			1/1	1	1/1	1	1/1G	1	1/1	1			1	1/1	1	1/1	1	1/1G	1	1/1	1					1	1/1	1	1/1	1	1/1G	1	1/1	1
NA12006	CYP3A4	1/3			1/3	1	1/3	1	1/3	1	1/3	1			1	1/3	1	1/3	1	1/3	1	1/3	1					1	1/3	1	1/3	1	1/3	1	1/3	1
NA12145	CYP3A4	1/1			1/1	1	1/1	1			1/1	1			1	1/1	1	1/1	1	1/1	1	1/1	1					1	1/1	1	1/1	1	1/1	1	1/1+1	0
NA12156	CYP3A4	1/1			1/1	1	1/1	1	1/1	1	1/1	1			1	1/1	1	1/1	1	1/1	1	1/1	1					1	1/1	1	1/1	1	1/1	1	1/1+1	0
NA12236	CYP3A4	1/1			1/1	1	1/1	1	1/1	1	1/1	1			0													1	1/1	1	1/1	1	1/1	1	1/1+1	0
NA12336	CYP3A4	1/1			1/1	1	1/1	1	1/1	1	1/1	1			0													0
NA12375	CYP3A4	1/1			1/1	1	1/1	1	1/1	1	1/1	1			0													0
NA12717	CYP3A4	1B/22			1/22	1	1/22	1	1/1G	0	1/1	0			1	1/22	1	1/22	1	1G/22	1	1/1	0					1	1/22	1	1/22	1	1G/22	1	1/1+1	0
NA12753	CYP3A4	1/1			1/1	1	1/1	1	1/1G	1	1/1	1			0													0
NA12813	CYP3A4	1/1			1/1	1	1/1	1	1/1G	1	1/1	1			1	1/1	1	1/1	1	1/1G	1	1/1	1					1	1/1	1	1/1	1	1/1G	1	1/1+1	0
NA12815	CYP3A4	1/1			1/1	1	1/1	1	1/1	1	1/1	1			0													0
NA12873	CYP3A4	1/1			1/1	1	1/1	1	1/1	1	1/1	1			1	1/1	1	1/1	1	1/1	1	1/1+1	0					1	1/1	1	1/1	1	1/1	1	1/1+1	0
NA12878	CYP3A4	1/1			1/1	1	1/1	1	1/1	1	1/1	1			0													0
NA12892	CYP3A4	1/22			1/22	1	1/22	1	1/1	0	1/1	0			0													0
NA15245	CYP3A4	1/14			1/14	1	1/14	1			1/14	1			0													1	1/14	1	1/14	1	1/14	1	1/14	1
NA17012	CYP3A4	1/1			1/1	1	1/1	1	1/1G	1	1/1	1			0													0
NA17061	CYP3A4	1/1			1/1	1	1/1	1			1/1	1			0													0
NA17074	CYP3A4	1/1			1/1	1	1/1	1	1/1	1	1/1	1			0													1	1/1	1	1/1	1	1/1	1	1/1+1	0
NA17102	CYP3A4	1/1			1/1	1	1/1	1	1G/1G	1	1B/1B	1			0													1	1/1	1	1/1	1	1G/1G	1	1B/1Bx2	0
NA17204	CYP3A4	1/1			1/1	1	1/1	1	1/1	1	1/1	1			0													1	1/1	1	1/1	1	1/1	1	1/1	1
NA17227	CYP3A4	1/1			1/1	1	1/1	1	1/1	1	1/1	1			0													1	1/1	1	1/1	1	1/1	1	1/1	1
NA17234	CYP3A4	1/1			1/1	1	1/1	1	1/1G	1	1/1	1			0													1	1/1	1	1/1	1			1/1+1	0
NA17235	CYP3A4	1/1			1/1	1	1/1	1	1/1	1	1/1	1			0													1	1/1	1	1/1	1	1/1	1	1/1	1
NA17244	CYP3A4	1/1			1/1	1	1/1	1	1/1	1	1/1	1			0													1	1/1	1	1/1	1	1/1	1	1/1+1	0
NA17288	CYP3A4	1/1			1/1	1	1/1	1	1/1G	1	1/1	1			0													0
NA17290	CYP3A4	1/1			1/1	1	1/1	1	1/1	1	1/1	1			0													0
NA17448	CYP3A4	1/1			1/1	1	1/1	1	1/1	1	1/1	1			0													1	1/1	1	1/1	1	1/1	1	1/1	1
NA17454	CYP3A4	1/1			1/1	1	1/1	1	1/1G	1	1/1	1			0													1	1/1	1	1/1	1	1/1G	1	1/1	1
NA17641	CYP3A4	1/1			1/1	1	1/1	1	1/1G	1	1/1	1			0													1	1/1	1	1/1	1	1/1G	1	1/1+1	0
NA17642	CYP3A4	1/1			1/1	1	1/1	1	1/1G	1	1/1	1			0													1	1/1	1	1/1	1	1/1G	1	1/1	1
NA17657	CYP3A4	1/1			1/1	1	1/1	1	1/1G	1	1/1	1			0													1	1/1	1	1/1	1	1/1G	1	1/1+1	0
NA17658	CYP3A4	1/1B			1/1	1	1/1	1	1/1	1	1/1	1			0													1	1/1	1	1/1	1	1/1	1	1/1	1
NA17660	CYP3A4	1/1			1/1	1	1/1	1	1G/1G	1	1/1	1			0													1	1/1	1	1/1	1			1/1	1
NA17673	CYP3A4	1/1			1/1	1	1/1	1	1/1G	1	1/1	1			0													1	1/1	1	1/1	1	1/1G	1	1/1	1
NA17679	CYP3A4	1/1			1/1	1	1/1	1	1/1	1	1/1	1			0													1	1/1	1	1/1	1	1/1	1	1/1	1
NA17702	CYP3A4	1/1			1/1	1	1/1	1	1/1	1	1/1	1			0													1	1/1	1	1/1	1	1/1	1	1/1	1
NA18484	CYP3A4	1B/1B			1/1	1	1/1	1	1G/1G	1	1B/1B	1			1	1/1	1	1/1	1	1G/1G	1	1B/1Bx2	0					1	1/1	1	1/1	1			1B/1Bx2	0
NA18509	CYP3A4	1/1B			1/1	1	1/1	1	1G/1G	1	1/1	1			1	1/1	1	1/1	1	1G/1G	1	1/1	1					1	1/1	1	1/1	1	1G/1G	1	1/1+1	0
NA18518	CYP3A4	1B/1B			1/1	1	1/1	1	1G/1G	1	1B/1B	1			1	1/1	1	1/1	1	1G/1G	1	1B/1B	1					1	1/1	1	1/1	1	1G/1G	1	1B/1Bx2	0
NA18519	CYP3A4	1B/1B			1/1	1	1/1	1			1B/1B	1			1	1/1	1	1/1	1	1G/1G	1	1B/1Bx2	0					1	1/1	1	1/1	1	1G/1G	1	1B/1B	1
NA18524	CYP3A4	1/1			1/1	1	1/1	1	1/1G	1	1/1	1			1	1/1	1	1/1	1	1/1G	1	1/1+1	0					1	1/1	1	1/1	1	1/1G	1	1/1	1
NA18526	CYP3A4	1/1			1/1	1	1/1	1	1/1G	1	1/1	1			1	1/1	1	1/1	1	1/1G	1	1/1	1					1	1/1	1	1/1	1	1/1G	1	1/1	1
NA18540	CYP3A4	1/1			1/1	1	1/1	1	1/1G	1	1/1	1			1	1/1	1	1/1	1	1/1G	1	1/1+1+1	0					1	1/1	1	1/1	1	1/1G	1	1/1+1	0
NA18544	CYP3A4	1/1			1/1	1	1/1	1			1/1	1			1	1/1	1	1/1	1	1/1	1	1/1	1					1	1/1	1	1/1	1	1/1	1	1/1	1
NA18552	CYP3A4	1/1			1/1	1	1/1	1			1/1	1			1	1/1	1	1/1	1	1/1	1	1/1	1					1	1/1	1	1/1	1	1/1	1	1/1+1	0
NA18563	CYP3A4	1/1			1/1	1	1/1	1	1G/1G	1	1/1	1			0													0
NA18564	CYP3A4	1/1			1/1	1	1/1	1	1/1	1	1/1	1			1	1/1	1	1/1	1	1/1	1	1/1	1					1	1/1	1	1/1	1	1/1	1	1/1+1	0
NA18565	CYP3A4	1/1			1/1	1	1/1	1	1/1G	1	1/1	1			1	1/1	1	1/1	1	1/1G	1	1/1	1					1	1/1	1	1/1	1	1/1G	1	1/1	1
NA18572	CYP3A4	1/1			1/1	1	1/1	1			1/1	1			0													0
NA18617	CYP3A4	1/1			1/1	1	1/1	1	1/1	1	1/1	1			1	1/1	1	1/1	1	1/1	1	1/1	1					1	1/1	1	1/1	1	1/1	1	1/1+1	0
NA18855	CYP3A4	1/1B			1/1	1	1/1	1	1G/1G	1	1/1	1			1	1/1	1	1/1	1	1G/1G	1	1/1	1					1	1/1	1	1/1	1			1/1	1
NA18861	CYP3A4	1B/1B			1/1	1	1/1	1	1G/1G	1	1B/1B	1			1	1/1	1	1/1	1	1G/1G	1	1B/1Bx2	0					1	1/1	1	1/1	1	1G/1G	1	1B/1B	1
NA18868	CYP3A4	1B/1B			1/1	1	1/1	1			1B/1B	1			1	1/1	1	1/1	1	1/1G	1	1B/1B	1					1	1/1	1	1/1	1	1/1G	1	1B/1B	1
NA18873	CYP3A4	1/1			1/1	1	1/1	1	1G/1G	1	1/1	1			0													0
NA18942	CYP3A4	1/1			1/1	1	1/1	1	1/1G	1	1/1	1			1	1/1	1	1/1	1	1/1G	1	1/1+1	0					1	1/1	1	1/1	1	1/1G	1	1/1	1
NA18945	CYP3A4	1/1			1/1	1	1/1	1	1/1G	1	1/1	1			0													0
NA18952	CYP3A4	1/1			1/1	1	1/1	1	1/1	1	1/1	1			1	1/1	1	1/1	1	1/1	1	1/1	1					1	1/1	1	1/1	1	1/1	1	1/1	1
NA18959	CYP3A4	1/1			1/1	1	1/1	1	1/1G	1	1/1	1			1	1/1	1	1/1	1	1/1G	1	1/1+1	0					1	1/1	1	1/1	1	1/1G	1	1/1	1
NA18966	CYP3A4	1/16			1/16	1	1/16	1	1/16	1	1/16	1			1	1/16	1	1/16	1	1/16	1	1/16	1					1	1/16	1	1/16	1	1/16	1	1/16	1
NA18973	CYP3A4	1/1			1/1	1	1/1	1	1/1	1	1/1	1			1	1/1	1	1/1	1	1/1	1	1/1	1					1	1/1	1	1/1	1	1/1	1	1/1	1
NA18980	CYP3A4	1/1			1/1	1	1/1	1	1/1G	1	1/1	1			1	1/1	1	1/1	1	1/1G	1	1/1+1	0					1	1/1	1	1/1	1	1/1G	1	1/1	1
NA18992	CYP3A4	1/1			1/1	1	1/1	1	1/1	1	1/1	1			1	1/1	1	1/1	1	1/1	1	1/1	1					1	1/1	1	1/1	1	1/1	1	1/1	1
NA19003	CYP3A4	1/1			1/1	1	1/1	1	1/1	1	1/1	1			1	1/1	1	1/1	1	1/1	1	1/1	1					1	1/1	1	1/1	1	1/1	1	1/1	1
NA19007	CYP3A4	1/1			1/1	1	1/1	1	1/1	1	1/1	1			1	1/1	1	1/1	1	1/1	1	1/1+1	0					1	1/1	1	1/1	1	1/1	1	1/1	1
NA19035	CYP3A4	1/12			1/12	1	1/12	1			1B/12	1			0													0
NA19095	CYP3A4	1/1B			1/1	1	1/1	1	1/1G	1	1/1	1			1	1/1	1	1/1	1	1/1G	1	1/1	1					1	1/1	1	1/1	1	1/1G	1	1/1	1
NA19109	CYP3A4	1B/15			1/15	1	1/15	1			1B/1B	0			1	1/15	1	1/15	1	15/1G	1	1B/1B	0					1	1/15	1	1/15	1	15/1G	1	1B/1B	0
NA19122	CYP3A4	1B/1B			1/1	1	1/1	1	1G/1G	1	1B/1B	1			1	1/1	1	1/1	1	1G/1G	1	1B/1Bx2	0					1	1/1	1	1/1	1	1G/1G	1	1B/1Bx2	0
NA19143	CYP3A4	1B/1B			1/1	1	1/1	1	1/1G	1	1B/1B	1			1	1/1	1	1/1	1	1/1G	1	1B/1B	1					1	1/1	1	1/1	1	1/1G	1	1B/1B	1
NA19147	CYP3A4	1/1B			1/1	1	1/1	1	1/1G	1	1/1	1			1	1/1	1	1/1	1	1/1G	1	1/1	1					1	1/1	1	1/1	1	1/1G	1	1/1+1	0
NA19174	CYP3A4	1B/1B			1/1	1	1/1	1	1G/1G	1	1B/1B	1			1	1/1	1	1/1	1	1G/1G	1	1B/1B	1					1	1/1	1	1/1	1	1G/1G	1	1B/1B	1
NA19176	CYP3A4	1B/1B			1/1	1	1/1	1	1G/1G	1	1B/1B	1			1	1/1	1	1/1	1	1G/1G	1	1B/1B	1					1	1/1	1	1/1	1	1G/1G	1	1B/1Bx2	0
NA19178	CYP3A4	1B/1B			1/1	1	1/1	1	1G/1G	1	1B/1B	1			1	1/1	1	1/1	1	1G/1G	1	1B/1B	1					1	1/1	1	1/1	1	1G/1G	1	1B/1B	1
NA19207	CYP3A4	1B/1B			1/1	1	1/1	1	1G/1G	1	1B/1B	1			1	1/1	1	1/1	1	1G/1G	1	1B/1B	1					1	1/1	1	1/1	1	1G/1G	1	1B/1B	1
NA19213	CYP3A4	1B/1B			1/1	1	1/1	1	1G/1G	1	1B/1B	1			1	1/1	1	1/1	1	1G/1G	1	1B/1B	1					1	1/1	1	1/1	1	1G/1G	1	1B/1Bx2	0
NA19226	CYP3A4	1B/15			1/15	1	1/15	1	1G/1G	0	1B/1B	0			1	1/15	1	1/15	1	15/1G	1	1B/1B	0					1	1/15	1	1/15	1	15/1G	1	1B/1B	0
NA19238	CYP3A4	1/1			1/1	1	1/1	1	1G/1G	1	1B/1B	1			0													0
NA19239	CYP3A4	1/1B			1/1	1	1/1	1	1G/1G	1	1/1	1			1	1/1	1	1/1	1	1G/1G	1	1/1	1					1	1/1	1	1/1	1	1G/1G	1	1/1+1	0
NA19444	CYP3A4	1/1			1/1	1	1/1	1	1/1G	1	1/1	1			0													0
NA19700	CYP3A4	1/1			1/1	1	1/1	1	1/1G	1	1B/1B	1			0													0
NA19785	CYP3A4	1/1			1/1	1	1/1	1	1/1G	1	1/1	1			0													0
NA19789	CYP3A4	1/1			1/1	1	1/1	1	1/1G	1	1/1	1			1	1/1	1	1/1	1	1/1G	1	1/1+1	0					1	1/1	1	1/1	1	1/1G	1	1/1	1
NA19819	CYP3A4	1/1B			1/1	1	1/1	1	1/1	1	1/1	1			1	1/1	1	1/1	1	1/1	1	1/1	1					1	1/1	1	1/1	1	1/1	1	1/1	1
NA19908	CYP3A4	1B/15			1/15	1	1/15	1			1B/1B	0			1	1/15	1	1/15	1	1/15	1	1B/1B	0					1	1/15	1	1/15	1	1/15	1	1B/1Bx2	0
NA19917	CYP3A4	1/1			1/1	1	1/1	1	1G/1G	1	1/1	1			1	1/1	1	1/1	1	1G/1G	1	1/1	1					1	1/1	1	1/1	1	1G/1G	1	1/1	1
NA19920	CYP3A4	1B/1B			1/1	1	1/1	1	1G/1G	1	1B/1B	1			1	1/1	1	1/1	1	1G/1G	1	1B/1B	1					1	1/1	1	1/1	1	1G/1G	1	1B/1Bx2	0
NA20296	CYP3A4	1B/1B			1/1	1	1/1	1			1B/1B	1			1	1/1	1	1/1	1	1G/1G	1	1B/1B	1					1	1/1	1	1/1	1	1G/1G	1	1B/1B	1
NA20509	CYP3A4	1/1			1/1	1	1/1	1	1/1	1	1/1	1			1	1/1	1	1/1	1	1/1	1	1/1+1	0					1	1/1	1	1/1	1	1/1	1	1/1	1
NA21781	CYP3A4	1/1			1/1	1	1/1	1	1/1	1	1/1	1			1	1/1	1	1/1	1	1/1	1	1/1	1					1	1/1	1	1/1	1	1/1	1	1/1+1	0
NA23090	CYP3A4	1/1			1/1	1	1/1	1	1/1G	1	1/1	1			0													0
NA23093	CYP3A4	1/1			1/1	1	1/1	1	1/1G	1	1/1	1			0													0
NA23246	CYP3A4	1/1			1/1	1	1/1	1	1/1	1	1/1	1			0													1	1/1	1	1/1	1	1/1	1	1/1	1
NA23275	CYP3A4	1B/1B			1/1	1	1/1	1			1B/1B	1			0													1	1/1	1	1/1	1	1G/1G	1	1B/1Bx2	0
NA23296	CYP3A4	1/1			1/1	1	1/1	1			1/1	1			0													0
NA23297	CYP3A4	1/1			1/1	1	1/1	1	1G/1G	1	1/1	1			0													0
NA23313	CYP3A4	1/22			1/22	1	1/22	1	1/22	1	1/1	0			0													0
NA23348	CYP3A4	1/1			1/1	1	1/1	1	1/1	1	1/1	1			0													1	1/1	1	1/1	1	1/1	1	1/1	1
NA23405	CYP3A4	1/1			1/1	1	1/1	1	1/1G	1	1/1	1			0													0
NA23872	CYP3A4	1/1			1/1	1	1/1	1	1/1	1	1/1	1			0													0
NA23873	CYP3A4	1/1			1/1	1	1/1	1	1/1	1	1/1	1			0													0
NA23874	CYP3A4	1/1			1/1	1	1/1	1	1/1	1	1/1	1			0													1	1/1	1	1/1	1	1/1	1	1/1	1
NA23877	CYP3A4	1/1			1/1	1	1/1	1	1/1	1	1/1	1			0													0
NA23878	CYP3A4	1/1			1/1	1	1/1	1	1/1	1	1/1	1			0													0
NA23881	CYP3A4	1/1			1/1	1	1/1	1	1/1	1	1/1	1			0													0
NA24008	CYP3A4	22/22			22/22	1	22/22	1	22/22	1	1/1	0			0													1	22/22	1	22/22	1	22/22	1	22/22+2	0
NA24009	CYP3A4	1/1B			1/1	1	1/1	1	1/1G	1	1/1	1			0													0
NA24027	CYP3A4	1/1			1/1	1	1/1	1	1/1G	1	1/1	1			0													1	1/1	1	1/1	1	1/1G	1	1/1+1+1	0
NA24217	CYP3A4	1/1			1/1	1	1/1	1	1/1G	1	1/1	1			0													0
HG00276	CYP3A43	1B/3			1/3	1	1/3	1			1/3	1			1	1/3	1	1/3	1			1B/3	1					1	1/3	1	1/3	1			1/3	1
HG00436	CYP3A43	1/1			1/1	1	1/1	1			1/1	1			1	1/1	1	1/1	1			1/1	1					0
HG00589	CYP3A43	1/1			1/1	1	1/1	1			1/1	1			1	1/1	1	1/1	1			1/1	1					1	1/1	1	1/1	1			1/1	1
HG01190	CYP3A43	1/1			1/1	1	1/1	1			1/1	1			1	1/1	1	1/1	1			1/1	1					1	1/1	1	1/1	1			1/1+1	0
NA06991	CYP3A43	1/1			1/1	1	1/1	1			1/1	1			1	1/1	1	1/1	1			1/1	1					1	1/1	1	1/1	1			1/1+1	0
NA07019	CYP3A43	1/1			1/1	1	1/1	1			1/1	1			1	1/1	1	1/1	1			1/1	1					1	1/1	1	1/1	1			1/1	1
NA07029	CYP3A43	1/1			1/1	1	1/1	1			1/1	1			1	1/1	1	1/1	1			1/1	1					1	1/1	1	1/1	1			1/1	1
NA07055	CYP3A43	1/1			1/1	1	1/1	1			1/1	1			1	1/1	1	1/1	1			1/1	1					1	1/1	1	1/1	1			1/1+1	0
NA07056	CYP3A43	1/1			1/1	1	1/1	1			1/1	1			1	1/1	1	1/1	1			1/1	1					1	1/1	1	1/1	1			1/1	1
NA07348	CYP3A43	1/1			1/1	1	1/1	1			1/1	1			1	1/1	1	1/1	1			1/1	1					1	1/1	1	1/1	1			1/1	1
NA07357	CYP3A43	1/1			1/1	1	1/1	1			1/1	1			1	1/1	1	1/1	1			1/1	1					1	1/1	1	1/1	1			1/1	1
NA07439	CYP3A43	1/3			1/3	1	1/3	1			1/3	1			0													1	1/3	1	1/3	1			1/3	1
NA10831	CYP3A43	1/1B			1/1	1	1/1	1			1/1	1			1	1/1	1	1/1	1			1/1B	1					1	1/1	1	1/1	1			1B/1	1
NA10847	CYP3A43	1/1			1/1	1	1/1	1			1/1	1			1	1/1	1	1/1	1			1/1+1	0					1	1/1	1	1/1	1			1/1	1
NA10851	CYP3A43	1/1			1/1	1	1/1	1			1/1	1			1	1/1	1	1/1	1			1/1+1	0					1	1/1	1	1/1	1			1/1+1	0
NA10854	CYP3A43	1/3	1/2;2/3	1	1/3	0	1/3	0			1/3	0			1	1/2B;2/3	1	1/2B;2/3	1			1/2B	1					1	1/2B;2/3	1	2B/3	1			1/2B	1
NA11832	CYP3A43	1/1			1/1	1	1/1	1			1/1	1			1	1/1	1	1/1	1			1/1+1	0					1	1/1	1	1/1	1			1/1	1
NA11839	CYP3A43	1/1			1/1	1	1/1	1			1/1	1			1	1/1	1	1/1	1			1/1	1					1	1/1	1	1/1	1			1/1	1
NA11993	CYP3A43	1/1			1/1	1	1/1	1			1/1	1			1	1/1	1	1/1	1			1/1	1					1	1/1	1	1/1	1			1/1+1	0
NA12003	CYP3A43	1/1			1/1	1	1/1	1			1/1	1			1	1/1	1	1/1	1			1/1	1					1	1/1	1	1/1	1			1/1	1
NA12006	CYP3A43	1/1			1/1	1	1/1	1			1/1	1			1	1/1	1	1/1	1			1/1	1					1	1/1	1	1/1	1			1/1	1
NA12145	CYP3A43	1/1			1/1	1	1/1	1			1/1	1			1	1/1	1	1/1	1			1/1	1					1	1/1	1	1/1	1			1/1+1	0
NA12156	CYP3A43	1/1B			1/1	1	1/1	1			1/1	1			1	1/1	1	1/1	1			1/1B	1					1	1/1	1	1/1	1			1/1+1	0
NA12236	CYP3A43	1/1			1/1	1	1/1	1			1/1	1			0													1	1/1	1	1/1	1			1/1+1	0
NA12717	CYP3A43	1/1			1/1	1	1/1	1			1/1	1			1	1/1	1	1/1	1			1/1	1					1	1/1	1	1/1	1			1/1	1
NA12813	CYP3A43	1/1B			1/1	1	1/1	1			1/1	1			1	1/1	1	1/1	1			1/1B	1					1	1/1	1	1/1	1			1/1+1	0
NA12873	CYP3A43	1/3			1/3	1	1/3	1			1/3	1			1	1/3	1	1/3	1			1/3	1					1	1/3	1	1/3	1			1/3	1
NA12878	CYP3A43	1/1			1/1	1	1/1	1			1/1	1			0													0
NA15245	CYP3A43	1/1			1/1	1	1/1	1			1/1	1			0													1	1/1	1	1/1	1			1/1	1
NA17074	CYP3A43	1/1			1/1	1	1/1	1			1/1	1			0													1	1/1	1	1/1	1			1/1+1	0
NA17204	CYP3A43	1/1			1/1	1	1/1	1			1/1	1			0													1	1/1	1	1/1	1			1/1	1
NA17227	CYP3A43	1/1			1/1	1	1/1	1			1/1	1			0													1	1/1	1	1/1	1			1/1	1
NA17234	CYP3A43	1/1			1/1	1	1/1	1			1/1	1			0													1	1/1	1	1/1	1			1/1+1	0
NA17235	CYP3A43	1/1			1/1	1	1/1	1			1/1	1			0													1	1/1	1	1/1	1			1/1	1
NA17244	CYP3A43	1/1			1/1	1	1/1	1			1/1	1			0													1	1/1	1	1/1	1			1/1+1	0
NA17448	CYP3A43	1/1			1/1	1	1/1	1			1/1	1			0													1	1/1	1	1/1	1			1/1	1
NA17454	CYP3A43	1/1			1/1	1	1/1	1			1/1	1			0													1	1/1	1	1/1	1			1/1	1
NA17641	CYP3A43	1/1			1/1	1	1/1	1			1/1	1			0													1	1/1	1	1/1	1			1/1+1	0
NA17642	CYP3A43	1/3			1/3	1	1/3	1			1/3	1			0													1	1/2B	0	1/2B;2/3	0			1/2B	0
NA17657	CYP3A43	1/1			1/1	1	1/1	1			1/1	1			0													1	1/1	1	1/1	1			1/1	1
NA17658	CYP3A43	1/1			1/1	1	1/1	1			1/1	1			0													1	1/1	1	1/1	1			1/1	1
NA17660	CYP3A43	1/1			1/1	1	1/1	1			1/1	1			0													1	1/1	1	1/1	1			1/1	1
NA17673	CYP3A43	1/1			1/1	1	1/1	1			1/1	1			0													1	1/1	1	1/1	1			1/1	1
NA17679	CYP3A43	1/1			1/1	1	1/1	1			1/1	1			0													1	1/1	1	1/1	1			1/1	1
NA17702	CYP3A43	1/1			1/1	1	1/1	1			1/1	1			0													1	1/1	1	1/1	1			1/1	1
NA18484	CYP3A43	1/1			1/1	1	1/1	1			1/1	1			1	1/1	1	1/1	1			1/1+1	0					1	1/1	1	1/1	1			1/1	1
NA18509	CYP3A43	3/3			3/3	1	3/3	1			3/3	1			1	3/3	1	3/3	1			3/3	1					1	3/3	1	3/3	1			3/3+3	0
NA18518	CYP3A43	1/3	1/2;2/3	1	1/3	0					1/3	0			1	1/2B;2/3	1	1/2B;2/3	1			1/2B	1					1	1/2B;2/3	1	1/2B;2/3	1			1/[2B,2A,3]	1
NA18519	CYP3A43	1/3	1/2;2/3	1	1/3	0					1/3	0			1	1/2B;2/3	1	1/2B;2/3	1			1/2B	1					1	1/2B;2/3	1	1/2B;2/3	1			1/2B	1
NA18524	CYP3A43	1/1			1/1	1	1/1	1			1/1	1			1	1/1	1	1/1	1			1/1+1	0					1	1/1	1	1/1	1			1/1	1
NA18526	CYP3A43	1/1			1/1	1	1/1	1			1/1	1			1	1/1	1	1/1	1			1/1	1					1	1/1	1	1/1	1			1/1	1
NA18540	CYP3A43	1/1			1/1	1	1/1	1			1/1	1			1	1/1	1	1/1	1			1/1+1+1	0					1	1/1	1	1/1	1			1/1+1	0
NA18544	CYP3A43	1/1			1/1	1	1/1	1			1/1	1			1	1/1	1	1/1	1			1/1	1					1	1/1	1	1/1	1			1/1	1
NA18552	CYP3A43	1/1			1/1	1	1/1	1			1/1	1			1	1/1	1	1/1	1			1/1	1					1	1/1	1	1/1	1			1/1	1
NA18564	CYP3A43	1/1			1/1	1	1/1	1			1/1	1			1	1/1	1	1/1	1			1/1	1					1	1/1	1	1/1	1			1/1+1	0
NA18565	CYP3A43	1/1			1/1	1	1/1	1			1/1	1			1	1/1	1	1/1	1			1/1	1					1	1/1	1	1/1	1			1/1	1
NA18855	CYP3A43	1/1			1/1	1	1/1	1			1/1	1			1	1/1	1	1/1	1			1/1	1					1	1/1	1	1/1	1			1/1	1
NA18861	CYP3A43	1/1			1/1	1	1/1	1			1/1	1			1	1/1	1	1/1	1			1/1	1					1	1/1	1	1/1	1			1/1	1
NA18868	CYP3A43	1/1	1/2	1	1/1	0	1/1	0			1/1	0			1	1/2	1	1/2	1			1/2A	1					1	1/2	1	1/2	1			1/2A	1
NA18942	CYP3A43	1/1			1/1	1	1/1	1			1/1	1			1	1/1	1	1/1	1			1/1+1	0					1	1/1	1	1/1	1			1/1	1
NA18952	CYP3A43	1/1			1/1	1	1/1	1			1/1	1			1	1/1	1	1/1	1			1/1	1					1	1/1	1	1/1	1			1/1	1
NA18959	CYP3A43	1/1			1/1	1	1/1	1			1/1	1			1	1/1	1	1/1	1			1/1	1					1	1/1	1	1/1	1			1/1	1
NA18966	CYP3A43	1/1			1/1	1	1/1	1			1/1	1			1	1/1	1	1/1	1			1/1	1					1	1/1	1	1/1	1			1/1+1	0
NA18973	CYP3A43	1/1			1/1	1	1/1	1			1/1	1			1	1/1	1	1/1	1			1/1	1					1	1/1	1	1/1	1			1/1	1
NA18980	CYP3A43	1/1			1/1	1	1/1	1			1/1	1			1	1/1	1	1/1	1			1/1+1	0					1	1/1	1	1/1	1			1/1	1
NA18992	CYP3A43	1/1			1/1	1	1/1	1			1/1	1			1	1/1	1	1/1	1			1/1	1					1	1/1	1	1/1	1			1/1	1
NA19003	CYP3A43	1/1			1/1	1	1/1	1			1/1	1			1	1/1	1	1/1	1			1/1	1					1	1/1	1	1/1	1			1/1	1
NA19007	CYP3A43	1/1			1/1	1	1/1	1			1/1	1			1	1/1	1	1/1	1			1/1	1					1	1/1	1	1/1	1			1/1	1
NA19095	CYP3A43	1/1			1/1	1	1/1	1			1/1	1			1	1/1	1	1/1	1			1/1	1					1	1/1	1	1/1	1			1/1	1
NA19109	CYP3A43	1/3			1/3	1	1/3	1			1/3	1			1	1/3	1	1/3	1			1/3	1					1	1/3	1	1/3	1			1/3	1
NA19122	CYP3A43	1/1			1/1	1	1/1	1			1/1	1			1	1/1	1	1/1	1			1/1+1	0					1	1/1	1	1/1	1			1/1+1	0
NA19143	CYP3A43	1/3	1/2;2/3	1	1/3	0	1/3	0			1/3	0			1	1/2B;2/3	1	1/2B;2/3	1			1/2B	1					1	1/2B	1	1/2B;2/3	1			1/2B	1
NA19147	CYP3A43	1/3	1/2;2/3	1	1/3	0	1/3	0			1/3	0			1	1/2B;2/3	1	1/2B;2/3	1			1/2B	1					1	1/2B;2/3	1	1/2B;2/3	1			1/[2B,2A,3]	1
NA19174	CYP3A43	1/3	1/2;2/3	1	1/3	0	1/3	0			1/3	0			1	1/2B;2/3	1	1/2B;2/3	1			1/2B	1					1	1/2B	1	1/2B;2/3	1			1/2B	1
NA19176	CYP3A43	1/1			1/1	1	1/1	1			1/1	1			1	1/1	1	1/1	1			1/1	1					1	1/1	1	1/1	1			1/1	1
NA19178	CYP3A43	1/1			1/1	1	1/1	1			1/1	1			1	1/1	1	1/1	1			1/1	1					1	1/1	1	1/1	1			1/1	1
NA19207	CYP3A43	1/1			1/1	1	1/1	1			1/1	1			1	1/1	1	1/1	1			1/1	1					1	1/1	1	1/1	1			1/1	1
NA19213	CYP3A43	1/3	2/2	1	2/2B	1	2/2B	1			2A/2B	1			1	2/2B	1	2/2B	1			2A/2B	1					1	2/2B	1	2/2B	1			2A/2B	1
NA19226	CYP3A43	1/3			1/3	1	1/3	1			1/3	1			1	1/3	1	1/3	1			1/3	1					1	1/3	1	1/3	1			1/3	1
NA19239	CYP3A43	1/3			1/3	1	1/3	1			1/3	1			1	1/3	1	1/3	1			1/3	1					1	1/3	1	1/3	1			1/3	1
NA19789	CYP3A43	1/1			1/1	1	1/1	1			1/1	1			1	1/1	1	1/1	1			1/1+1	0					1	1/1	1	1/1	1			1/1	1
NA19819	CYP3A43	1/3	1/2;2/3	1	1/3	0	1/3	0			1/3	0			1	1/2B;2/3	1	1/2B;2/3	1			1/2B	1					1	1/2B	1	1/2B;2/3	1			1/2B	1
NA19908	CYP3A43	3/3			3/3	1	3/3	1			3/3	1			1	3/3	1	3/3	1			3/3	1					1	3/3	1	3/3	1			3/3+3	0
NA19920	CYP3A43	1/1			1/1	1	1/1	1			1/1	1			1	1/1	1	1/1	1			1/1	1					1	1/1	1	1/1	1			1/1	1
NA20296	CYP3A43	1/3	1/2;2/3	1	1/3	0					1/3	0			1	1/2B;2/3	1	1/2B;2/3	1			1/2B	1					1	1/2B	1	1/2B;2/3	1			1/[2B,2A,3]	1
NA20509	CYP3A43	1/1			1/1	1	1/1	1			1/1	1			1	1/1	1	1/1	1			1/1+1	0					1	1/1	1	1/1	1			1/1+1	0
NA23246	CYP3A43	1/1			1/1	1	1/1	1			1/1	1			0													1	1/1	1	1/1	1			1/1	1
NA23275	CYP3A43	1/1			1/1	1	1/1	1			1/1	1			0													1	1/1	1	1/1	1			1/1+1	0
NA23313	CYP3A43	1/1			1/1	1	1/1	1			1/1	1			0													0
NA23348	CYP3A43	1/1			1/1	1	1/1	1			1/1	1			0													1	1/1	1	1/1	1			1/1	1
NA23873	CYP3A43	1/1			1/1	1	1/1	1			1/1	1			0													0
NA23874	CYP3A43	1/1			1/1	1	1/1	1			1/1	1			0													1	1/1	1	1/1	1			1/1	1
NA23877	CYP3A43	1/1			1/1	1	1/1	1			1/1	1			0													0
NA24008	CYP3A43	1/1			1/1	1	1/1	1			1/1	1			0													1	1/1	1	1/1	1			1/1+1	0
NA24009	CYP3A43	1/1			1/1	1	1/1	1			1/1	1			0													0
NA24217	CYP3A43	1/1			1/1	1	1/1	1			1/1	1			0													0
HG00276	CYP3A5	3/3			3/3	1	3/3	1	3/3	1	3/3	1			1	3/3	1	3/3	1	3/3	1	3/3	1					1	3/3	1	3/3	1	3/3	1	3/3	1
HG00436	CYP3A5	3/3			3/3G	1	3/3G	1	3/3	1	3/3	1			1	3/3G	1	3/3G	1	3/3	1	3/3	1					0
HG00589	CYP3A5	3/3			3/3	1	3/3	1	3/3	1	3/3	1			1	3/3	1	3/3	1	3/3	1	3/3	1					1	3/3	1	3/3	1	3/3	1	3/3	1
HG01190	CYP3A5	1/1			1/1	1	1/1	1	1/1	1	3/3	0			1	1/1	1	1/1	1	1/1	1	3/3	0					1	1/1	1	1/1	1	1/1	1	3/3+3	0
NA06991	CYP3A5	3/3			3/3	1	3/3	1	3/3	1	3/3	1			1	3/3	1	3/3	1	3/3	1	3/3	1					1	3/3	1	3/3	1	3/3	1	3/3+3	0
NA06993	CYP3A5	3/3			3/3	1	3/3	1	3/3	1	3/3	1			0													0
NA07000	CYP3A5	1/3			1/3	1	1/3	1	1/3	1	1/3	1			1	1/3	1	1/3	1	1/3	1	1/3	1					1	1/3	1	1/3	1	1/3	1	1/3	1
NA07019	CYP3A5	3/3			3/3	1	3/3	1	3/3	1	3/3	1			1	3/3	1	3/3	1	3/3	1	3/3	1					1	3/3	1	3/3	1	3/3	1	3/3	1
NA07029	CYP3A5	1/3			1/3	1	1/3	1	1/3	1	1/3	1			1	1/3	1	1/3	1	1/3	1	1/3	1					1	1/3	1	1/3	1	1/3	1	1/3	1
NA07048	CYP3A5	3/3			3/3	1	3/3	1	3/3	1	3/3	1			0													0
NA07055	CYP3A5	3/3			3/3	1	3/3	1	3/3	1	3/3	1			1	3/3	1	3/3	1	3/3	1	3/3	1					1	3/3	1	3/3	1	3/3	1	3/3+3	0
NA07056	CYP3A5	3/3			3/3	1	3/3	1	3/3	1	3/3	1			1	3/3	1	3/3	1	3/3	1	3/3	1					1	3/3	1	3/3	1	3/3	1	3/3	1
NA07348	CYP3A5	3/3			3/3	1	3/3	1	3/3	1	3/3	1			1	3/3	1	3/3	1	3/3	1	3/3	1					1	3/3	1	3/3	1	3/3	1	3/3+3	0
NA07357	CYP3A5	3/3			3/3	1	3/3	1	3/3	1	3/3	1			1	3/3	1	3/3	1	3/3	1	3/3	1					1	3/3	1	3/3	1	3/3	1	3/3	1
NA07439	CYP3A5	1/1			1/1	1	1/1	1	1/1	1	3/3	0			0													1	1/1	1	1/1	1	1/1	1	3/3	0
NA10831	CYP3A5	3/3			3/3	1	3/3	1	3/3	1	3/3	1			1	3/3	1	3/3	1	3/3	1	3/3	1					1	3/3	1	3/3	1	3/3	1	3/3+3	0
NA10838	CYP3A5	3/3			3/3	1	3/3	1	3/3	1	3/3	1			0													0
NA10846	CYP3A5	3/3			3/3	1	3/3	1			3/3	1			0													0
NA10847	CYP3A5	3/3			3/3	1	3/3	1	3/3	1	3/3	1			1	3/3	1	3/3	1	3/3	1	3/3+3	0					1	3/3	1	3/3	1	3/3	1	3/3	1
NA10851	CYP3A5	3/3			3/3	1	3/3	1	3/3	1	3/3	1			1	3/3	1	3/3	1	3/3	1	3/3+3	0					1	3/3	1	3/3	1	3/3	1	3/3+3	0
NA10854	CYP3A5	1/3			1/3	1	1/3	1	1/3	1	1/3	1			1	1/3	1	1/3	1	1/3	1	1/3	1					1	1/3	1	1/3	1	1/3	1	1/3	1
NA10855	CYP3A5	3/3			3/3	1	3/3	1	3/3	1	3/3	1			0													0
NA10856	CYP3A5	1/3			1/3	1	1/3	1	1/3	1	1/3	1			0													0
NA10859	CYP3A5	3/3			3/3	1	3/3	1	3/3	1	3/3	1			0													0
NA10865	CYP3A5	3/3			3/3B	1	3/3B	1	3/3	1	3/3	1			0													0
NA11832	CYP3A5	3/3			3/3	1	3/3	1	3/3	1	3/3	1			1	3/3	1	3/3	1	3/3	1	3/3	1					1	3/3	1	3/3	1	3/3	1	3/3	1
NA11839	CYP3A5	1/3			1/3	1	1/3	1	1/3	1	1/3	1			1	1/3	1	1/3	1	1/3	1	1/3	1					1	1/3	1	1/3	1	1/3	1	1/3	1
NA11881	CYP3A5	3/3			3/3	1	3/3	1	3/3	1	3/3	1			0													0
NA11993	CYP3A5	3/3			3/3	1	3/3	1	3/3	1	3/3	1			1	3/3	1	3/3	1	3/3	1	3/3	1					1	3/3	1	3/3	1	3/3	1	3/3+3	0
NA12003	CYP3A5	1/3			1/3	1	1/3	1	1/3	1	1/3	1			1	1/3	1	1/3	1	1/3	1	1/3	1					1	1/3	1	1/3	1	1/3	1	1/3	1
NA12006	CYP3A5	3/3			3/3K;CYP3A510	1	3/3K;CYP3A510	1			3/3	1			1	3/3K;CYP3A510	1	3/3K;CYP3A510	1	3/3	1	3/3	1					1	3/3K;CYP3A510	1	3/3K;CYP3A510	1	3/3	1	3/3	1
NA12145	CYP3A5	3/3			3/3	1	3/3	1			3/3	1			1	3/3	1	3/3	1	3/3	1	3/3	1					1	3/3	1	3/3	1	3/3	1	3/3+3	0
NA12156	CYP3A5	3/3			3/3	1	3/3	1	3/3	1	3/3	1			1	3/3	1	3/3	1	3/3	1	3/3	1					1	3/3	1	3/3	1	3/3	1	3/3+3	0
NA12236	CYP3A5	3/3			3/3	1	3/3	1	3/3	1	3/3	1			0													1	3/3	1	3/3	1	3/3	1	3/3+3	0
NA12336	CYP3A5	3/3			3/3	1	3/3	1	3/3	1	3/3	1			0													0
NA12375	CYP3A5	3/3			3/3	1	3/3	1	3/3	1	3/3	1			0													0
NA12717	CYP3A5	1/3			1/3	1	1/3	1	3/3	0	1/3	1			1	1/3	1	1/3	1	1/3	1	1/3	1					1	1/3	1	1/3	1	1/3	1	1/3	1
NA12753	CYP3A5	3/3			3/3	1	3/3	1	3/3	1	3/3	1			0													0
NA12813	CYP3A5	3/3			3/3	1	3/3	1	3/3	1	3/3	1			1	3/3	1	3/3	1	3/3	1	3/3	1					1	3/3	1	3/3	1	3/3	1	3/3+3	0
NA12815	CYP3A5	3/3			3/3	1	3/3	1	3/3	1	3/3	1			0													0
NA12873	CYP3A5	3/3			3/3	1	3/3	1	3/3	1	3/3	1			1	3/3	1	3/3	1	3/3	1	3/3+3	0					1	3/3	1	3/3	1	3/3	1	3/3	1
NA12878	CYP3A5	3/3			3/3	1	3/3	1	3/3	1	3/3	1			0													0
NA12892	CYP3A5	3/3			3/3	1	3/3	1	3/3	1	3/3	1			0													0
NA15245	CYP3A5	3/3			3/3	1	3/3	1	3/3	1	3/3	1			0													1	3/3	1	3/3	1	3/3	1	3/3	1
NA17012	CYP3A5	3/3			3/3	1	3/3	1	3/3	1	3/3	1			0													0
NA17061	CYP3A5	3/3			3/3	1	3/3	1	3/3	1	3/3	1			0													0
NA17074	CYP3A5	3/3			3/3	1	3/3	1	3/3	1	3/3	1			0													1	3/3	1	3/3	1	3/3	1	3/3+3	0
NA17102	CYP3A5	3/3			3/3	1	3/3	1			3/3	1			0													1	3/3	1	3/3	1	3/3	1	3/3+3	0
NA17204	CYP3A5	3/3			3/3	1	3/3	1	3/3	1	3/3	1			0													1	3/3	1	3/3	1	3/3	1	3/3	1
NA17227	CYP3A5	3/3			3/3	1	3/3	1	3/3	1	3/3	1			0													1	3/3	1	3/3	1			3/3	1
NA17234	CYP3A5	3/3			3/3	1	3/3	1	3/3	1	3/3	1			0													1	3/3	1	3/3	1	3/3	1	3/3+3	0
NA17235	CYP3A5	3/3			3/3	1	3/3	1	3/3	1	3/3	1			0													1	3/3	1	3/3	1	3/3	1	3/3	1
NA17244	CYP3A5	3/3			3/3	1	3/3	1	3/3	1	3/3	1			0													1	3/3	1	3/3	1			3/3+3+3	0
NA17288	CYP3A5	3/3			3/3	1	3/3	1	3/3	1	3/3	1			0													0
NA17290	CYP3A5	3/3			3/3	1	3/3	1	3/3	1	3/3	1			0													0
NA17448	CYP3A5	3/3			3/3	1	3/3	1	3/3	1	3/3	1			0													1	3/3	1	3/3	1	3/3	1	3/3	1
NA17454	CYP3A5	1/3			1/3	1	1/3	1	1/3	1	1/3	1			0													1	1/3	1	1/3	1	1/3	1	1/3	1
NA17641	CYP3A5	3/3			3/3	1	3/3	1	3/3	1	3/3	1			0													1	3/3	1	3/3	1	3/3	1	3/3+3	0
NA17642	CYP3A5	3/3			3/3	1	3/3	1	3/3	1	3/3	1			0													1	3/3	1	3/3	1	3/3	1	3/3	1
NA17657	CYP3A5	1/3			1/3	1	1/3	1	3/3	0	1/3	1			0													1	1/3	1	1/3	1	1/3	1	1/3	1
NA17658	CYP3A5	3/3			3/3	1	3/3	1	3/3	1	3/3	1			0													1	3/3	1	3/3	1	3/3	1	3/3	1
NA17660	CYP3A5	3/3			3/3	1	3/3	1	3/3	1	3/3	1			0													1	3/3	1	3/3	1	3/3	1	3/3	1
NA17673	CYP3A5	3/3			3/3	1	3/3	1	3/3	1	3/3	1			0													1	3/3	1	3/3	1	3/3	1	3/3	1
NA17679	CYP3A5	3/3			3/3	1	3/3	1	3/3	1	3/3	1			0													1	3/3	1	3/3	1	3/3	1	3/3	1
NA17702	CYP3A5	3/3			3/3	1	3/3	1			3/3	1			0													1	3/3	1	3/3	1	3/3	1	3/3	1
NA18484	CYP3A5	1/7			1/7	1	1/7	1	1/7	1	3/3	0			1	1/7	1	1/7	1	1/7	1	3/3+3	0					1	1/7	1	1/7	1	1/7	1	3/3+3	0
NA18509	CYP3A5	1/7			1/7	1	1/7	1	1/7	1	3/3	0			1	1/7	1	1/7	1	1/7	1	3/3	0					1	1/7	1	1/7	1	1/7	1	3/3+3	0
NA18518	CYP3A5	1/6			1/6	1	1/6	1			3/3	0			1	1/6	1	1/6	1	1/6	1	1/6	1					1	1/6	1	1/6	1	1/6	1	1/6	1
NA18519	CYP3A5	1/6			1/6	1	1/6	1	1/6	1	3/3	0			1	1/6	1	1/6	1	1/6	1	1/6	1					1	1/6	1	1/6	1	1/6	1	3/3	0
NA18524	CYP3A5	1/3			1/3	1	1/3	1	3/3	0	1/3	1			1	1/3	1	1/3	1	1/3	1	1/3	1					1	1/3	1	1/3	1	1/3	1	1/3	1
NA18526	CYP3A5	1/1			1/1	1	1/1	1	1/1	1	3/3	0			1	1/1	1	1/1	1	1/1	1	3/3	0					1	1/1	1	1/1	1			3/3	0
NA18540	CYP3A5	1/3			1/3	1	1/3	1			1/3	1			1	1/3	1	1/3	1	1/3	1	1/3+3+3	0					1	1/3	1	1/3	1	1/3	1	1/3	1
NA18544	CYP3A5	1/3			1/3	1	1/3	1	1/3	1	1/3	1			1	1/3	1	1/3	1	1/3	1	1/3	1					1	1/3	1	1/3	1	1/3	1	1/3	1
NA18552	CYP3A5	3/3			3/3	1	3/3	1	3/3	1	3/3	1			1	3/3	1	3/3	1	3/3	1	3/3	1					1	3/3	1	3/3	1	3/3	1	3/3	1
NA18563	CYP3A5	1/1			1/1	1	1/1	1	1/1	1	3/3	0			0													0
NA18564	CYP3A5	1/1			1/1	1	1/1	1	1/1	1	3/3	0			1	1/1	1	1/1	1	1/1	1	3/3	0					1	1/1	1	1/1	1	1/1	1	3/3+3	0
NA18565	CYP3A5	1/3			1/3	1	1/3	1	1/3	1	1/3	1			1	1/3	1	1/3	1	1/3	1	1/3	1					1	1/3	1	1/3	1	1/3	1	1/3	1
NA18572	CYP3A5	1/3			1/3	1	1/3	1	1/3	1	1/3	1			0													0
NA18617	CYP3A5	3/3			3/3	1	3/3	1	3/3	1	3/3	1			1	3/3	1	3/3	1			3/3	1					1	3/3	1	3/3	1	3/3	1	3/3+3	0
NA18855	CYP3A5	3/6			3/6	1	3/6	1	3/6	1	1/3	0			1	3/6	1	3/6	1	3/6	1	1/3	0					1	3/6	1	3/6	1	3/6	1	1/3	0
NA18861	CYP3A5	1/1			1/1	1	1/1	1	1/1	1	3/3	0			1	1/1	1	1/1	1	1/1	1	1/1	1					1	1/1	1	1/1	1	1/1	1	3/3	0
NA18868	CYP3A5	1/3			1/3	1	1/3	1	1/3	1	1/3	1			1	1/3	1	1/3	1	1/3	1	1/3	1					1	1/3	1	1/3	1	1/3	1	1/3	1
NA18873	CYP3A5	1/1			1/1	1	1/1	1			3/3	0			0													0
NA18942	CYP3A5	3/3			3/3	1	3/3	1	3/3	1	3/3	1			1	3/3	1	3/3	1	3/3	1	3/3+3	0					1	3/3	1	3/3	1	3/3	1	3/3	1
NA18945	CYP3A5	1/3			1/3	1	1/3	1	1/3	1	1/3	1			0													0
NA18952	CYP3A5	3/3			3/3	1	3/3	1	3/3	1	3/3	1			1	3/3	1	3/3	1	3/3	1	3/3	1					1	3/3	1	3/3	1	3/3	1	3/3	1
NA18959	CYP3A5	1/3			1/3	1	1/3	1	3/3	0	1/3	1			1	1/3	1	1/3	1	1/3	1	1/3	1					1	1/3	1	1/3	1	1/3	1	1/3	1
NA18966	CYP3A5	1/3			1/3	1	1/3	1	3/3	0	1/3	1			1	1/3	1	1/3	1	1/3	1	1/3	1					1	1/3	1	1/3	1	1/3	1	1/3+3+3	0
NA18973	CYP3A5	1/3			1/3	1	1/3	1	1/3	1	1/3	1			1	1/3	1	1/3	1	1/3	1	1/3	1					1	1/3	1	1/3	1	1/3	1	1/3	1
NA18980	CYP3A5	1/3			1/3	1	1/3	1	3/3	0	1/3	1			1	1/3	1	1/3	1	1/3	1	1/3	1					1	1/3	1	1/3	1	1/3	1	1/3	1
NA18992	CYP3A5	3/3			3/3	1	3/3	1	3/3	1	3/3	1			1	3/3	1	3/3	1	3/3	1	3/3	1					1	3/3	1	3/3	1	3/3	1	3/3	1
NA19003	CYP3A5	3/3			3/3	1	3/3	1	3/3	1	3/3	1			1	3/3	1	3/3	1	3/3	1	3/3	1					1	3/3	1	3/3	1	3/3	1	3/3	1
NA19007	CYP3A5	3/3			3/3	1	3/3	1	3/3	1	3/3	1			1	3/3	1	3/3	1	3/3	1	3/3+3	0					1	3/3	1	3/3	1	3/3	1	3/3	1
NA19035	CYP3A5	1/7			1/7	1	1/7	1	1/1	0	3/3	0			0													0
NA19095	CYP3A5	1/3			1/3	1	1/3	1	3/3	0	1/3	1			1	1/3	1	1/3	1	1/3	1	1/3	1					1	1/3	1	1/3	1			1/3	1
NA19109	CYP3A5	1/3			1/3	1	1/3	1			1/3	1			1	1/3	1	1/3	1	1/3	1	1/3	1					1	1/3	1	1/3	1	1/3	1	1/3	1
NA19122	CYP3A5	1/1			1/1	1	1/1	1	1/1	1	3/3	0			1	1/1	1	1/1	1	3/3	0	3/3+3	0					1	1/1	1	1/1	1	3/3	0	3/3+3	0
NA19143	CYP3A5	6/7			6/7	1	6/7	1	6/7	1	3/3	0			1	6/7	1	6/7	1	6/7	1	3/3	0					1	6/7	1	6/7	1	6/7	1	3/3	0
NA19147	CYP3A5	1/3			1/3	1	1/3	1	1/3	1	1/3	1			1	3/3	0	3/3	0	1/3	1	1/3	1					1	1/3	1	1/3	1	1/3	1	1/3	1
NA19174	CYP3A5	1/6			1/6	1	1/6	1	1/6	1	3/3	0			1	1/6	1	1/6	1	1/6	1	3/3	0					1	1/6	1	1/6	1	1/6	1	3/3	0
NA19176	CYP3A5	1/3			1/3	1	1/3	1			1/3	1			1	1/3	1	1/3	1	1/3	1	1/3	1					1	1/3	1	1/3	1	1/3	1	1/3	1
NA19178	CYP3A5	1/1			1/1	1	1/1	1	1/1	1	3/3	0			1	1/1	1	1/1	1	1/1	1	3/3	0					1	1/1	1	1/1	1	1/1	1	3/3	0
NA19207	CYP3A5	3/7			3/7	1	3/7	1	1/7	0	1/3	0			1	3/7	1	3/7	1	3/7	1	1/3	0					1	3/7	1	3/7	1			1/3	0
NA19213	CYP3A5	1/6			1/6	1	1/6	1	1/6	1	3/3	0			1	1/6	1	1/6	1	1/6	1	1/6	1					1	1/6	1	1/6	1			3/3	0
NA19226	CYP3A5	1/6			1/6	1	1/6	1	1/6	1	3/3	0			1	1/6	1	1/6	1	1/6	1	3/3	0					1	1/6	1	1/6	1	1/6	1	3/3	0
NA19238	CYP3A5	1/1			1/1	1	1/1	1	1/1	1	3/3	0			0													0
NA19239	CYP3A5	1/1			1/1	1	1/1	1	1/1	1	3/3	0			1	1/1	1	1/1	1	1/1	1	1/1	1					1	1/1	1	1/1	1	1/1	1	3/3+3	0
NA19444	CYP3A5	3/7			3/7	1	3/7	1	1/3	0	1/3	0			0													0
NA19700	CYP3A5	1/3			1/3	1	1/3	1	3/3	0	1/3	1			0													0
NA19785	CYP3A5	1/3			1/3	1	1/3	1	3/3	0	1/3	1			0													0
NA19789	CYP3A5	3/3			3/3	1	3/3	1	3/3	1	3/3	1			1	3/3	1	3/3	1	3/3	1	3/3+3	0					1	3/3	1	3/3	1	3/3	1	3/3	1
NA19819	CYP3A5	3/6			3/6	1	3/6	1			1/3	0			1	3/6	1	3/6	1	3/6	1	1/3	0					1	3/6	1	3/6	1	3/6	1	1/3	0
NA19908	CYP3A5	1/3			1/3	1	1/3	1	3/3	0	1/3	1			1	1/3	1	1/3	1	1/3	1	1/3	1					1	1/3	1	1/3	1	1/3	1	1/3	1
NA19917	CYP3A5	1/7			1/7	1	1/7	1	1/7	1	3/3	0			1	1/7	1	1/7	1	1/7	1	3/3	0					1	1/7	1	1/7	1	1/7	1	3/3	0
NA19920	CYP3A5	7/7			7/7	1	7/7	1	7/7	1	3/3	0			1	7/7	1	7/7	1	7/7	1	3/3	0					1	7/7	1	7/7	1	7/7	1	3/3	0
NA20296	CYP3A5	1/6			1/6	1	1/6	1	1/6	1	3/3	0			1	1/6	1	1/6	1	1/6	1	3/3	0					1	1/6	1	1/6	1	1/6	1	3/3	0
NA20509	CYP3A5	3/3			3/3	1	3/3	1	3/3	1	3/3	1			1	3/3	1	3/3	1	3/3	1	3/3+3	0					1	3/3	1	3/3	1	3/3	1	3/3	1
NA21781	CYP3A5	3/3			3/3	1	3/3	1	3/3	1	3/3	1			1	3/3	1	3/3	1	3/3	1	3/3	1					1	3/3	1	3/3	1	3/3	1	3/3	1
NA23090	CYP3A5	1/3			1/3	1	1/3	1			1/3	1			0													0
NA23093	CYP3A5	1/3			1/3	1	1/3	1	1/3	1	1/3	1			0													0
NA23246	CYP3A5	3/3			3/3	1	3/3	1			3/3	1			0													1	3/3	1	3/3	1	3/3	1	3/3+3	0
NA23275	CYP3A5	1/1			1/1	1	1/1	1			3/3	0			0													1	1/1	1	1/1	1			1/1+1	0
NA23296	CYP3A5	3/3			3/3	1	3/3	1	3/3	1	3/3	1			0													0
NA23297	CYP3A5	1/7			1/7	1	1/7	1	1/7	1	3/3	0			0													0
NA23313	CYP3A5	3/3			3/3	1	3/3	1	3/3	1	3/3	1			0													0
NA23348	CYP3A5	3/3			3/3	1	3/3	1	3/3	1	3/3	1			0													1	3/3	1	3/3	1	3/3	1	3/3	1
NA23405	CYP3A5	1/3			1/3	1	1/3	1	3/3	0	1/3	1			0													0
NA23872	CYP3A5	3/3			3/3	1	3/3	1	3/3	1	3/3	1			0													0
NA23873	CYP3A5	3/3			3/3	1	3/3	1	3/3	1	3/3	1			0													0
NA23874	CYP3A5	3/3			3/3	1	3/3	1	3/3	1	3/3	1			0													1	3/3	1	3/3	1	3/3	1	3/3	1
NA23877	CYP3A5	3/3			3/3	1	3/3	1	3/3	1	3/3	1			0													0
NA23878	CYP3A5	3/3			3/3	1	3/3	1			3/3	1			0													0
NA23881	CYP3A5	3/3			3/3	1	3/3	1	3/3	1	3/3	1			0													0
NA24008	CYP3A5	3/3			3/3	1	3/3	1	3/3	1	3/3	1			0													1	3/3	1	3/3	1	3/3	1	3/3+3	0
NA24009	CYP3A5	3/6			3/6	1	3/6	1	1/6	0	1/3	0			0													0
NA24027	CYP3A5	1/3			1/3	1	1/3	1	1/3	1	1/3	1			0													1	1/3	1	1/3	1	1/3	1	1/3+3+3	0
NA24217	CYP3A5	1/3			1/3	1	1/3	1	3/3	0	1/3	1			0													0
HG00276	CYP3A7	1/1			1/1	1	1/1	1			2/2	0			1	1/1	1	1/1	1			1/1	1					1	1/1	1	1/1	1			2/2	0
HG00436	CYP3A7	1/1			1/1	1	1/1	1			2/2	0			1	1/1	1	1/1	1			1/1	1					0
HG00589	CYP3A7	1/1			1/1	1	1/1	1			2/2	0			1	1/1	1	1/1	1			1/1	1					1	1/1	1	1/1	1			2/2	0
HG01190	CYP3A7	1/1;1/2;2/2	2/2	1	2/2	1	2/2	1			2/2	1			1	2/2	1	2/2	1			2/2	1					1	2/2	1	2/2	1			2/2+2	0
NA06991	CYP3A7	1/1			1/1	1	1/1	1			2/2	0			1	1/1	1	1/1	1			1/1	1					1	1/1	1	1/1	1			1/1+1+1	0
NA07019	CYP3A7	1/1			1/1	1	1/1	1			2/2	0			1	1/1	1	1/1	1			1/1	1					1	1/1	1	1/1	1			1/1	1
NA07029	CYP3A7	1/2			1/2	1	1/2	1			1/2	1			1	1/2	1	1/2	1			1/2	1					1	1/2	1	1/2	1			1/2	1
NA07055	CYP3A7	1/1			1/1	1	1/1	1			2/2	0			1	1/1	1	1/1	1			1/1	1					1	1/1	1	1/1	1			1/1+1	0
NA07056	CYP3A7	1/1			1/1	1	1/1	1			2/2	0			1	1/1	1	1/1	1			1/1	1					1	1/1	1	1/1	1			2/2+2	0
NA07348	CYP3A7	1/1			1/1	1	1/1	1			2/2	0			1	1/1	1	1/1	1			1/1	1					1	1/1	1	1/1	1			1/1+1	0
NA07357	CYP3A7	1/1C			1/1	1	1/1	1			2/2	0			1	1/1	1	1/1	1			1/1	1					1	1/1	1	1/1	1			2/2	0
NA07439	CYP3A7	1/1;1/2;2/2	2/2	1	2/2	1	2/2	1			2/2	1			0													1	2/2	1	2/2	1			2/2+2	0
NA10831	CYP3A7	1/1			1/1	1	1/1	1			2/2	0			1	1/1	1	1/1	1			1/1	1					1	1/1	1	1/1	1			1/1+1	0
NA10847	CYP3A7	1/1			1/1	1	1/1	1			2/2	0			1	1/1	1	1/1	1			1/1	1					1	1/1	1	1/1	1			2/2	0
NA10851	CYP3A7	1/1			1/1	1	1/1	1			2/2	0			1	1/1	1	1/1	1			1/1+1	0					1	1/1	1	1/1	1			2/2+2	0
NA10854	CYP3A7	1/2			1/2	1	1/2	1			1/2	1			1	1/2	1	1/2	1			1/2	1					1	1/2	1	1/2	1			1/2	1
NA11832	CYP3A7	1/1			1/1	1	1/1	1			2/2	0			1	1/1	1	1/1	1			1/1+1	0					1	1/1	1	1/1	1			2/2+2	0
NA11839	CYP3A7	1/2			1/2	1	1/2	1			1/2	1			1	1/2	1	1/2	1			1/2	1					1	1/2	1	1/2	1			1/2	1
NA11993	CYP3A7	1/1			1/1	1	1/1	1			2/2	0			1	1/1	1	1/1	1			1/1	1					1	1/1	1	1/1	1			1/1+1	0
NA12003	CYP3A7	1/2			1/2	1	1/2	1			1/2	1			1	1/2	1	1/2	1			1/2	1					1	1/2	1	1/2	1			1/2	1
NA12006	CYP3A7	1/1			1/1	1	1/1	1			2/2	0			1	1/1	1	1/1	1			1/1	1					1	1/1	1	1/1	1			2/2	0
NA12145	CYP3A7	1/1			1/1	1	1/1	1			2/2	0			1	1/1	1	1/1	1			1/1	1					1	1/1	1	1/1	1			1/1+1	0
NA12156	CYP3A7	1/1			1/1	1	1/1	1			2/2	0			1	1/1	1	1/1	1			1/1	1					1	1/1	1	1/1	1			2/2+2	0
NA12236	CYP3A7	1/1			1/1	1	1/1	1			2/2	0			0													1	1/1	1	1/1	1			1/1+1	0
NA12717	CYP3A7	1/2			1/2	1	1/2	1			1/2	1			1	1/2	1	1/2	1			1/2	1					1	1/2	1	1/2	1			1/2	1
NA12813	CYP3A7	1/2			1/2	1	1/2	1			1/2	1			1	1/2	1	1/2	1			1/2	1					1	1/2	1	1/2	1			1/2	1
NA12873	CYP3A7	1/1			1/1	1	1/1	1			2/2	0			1	1/1	1	1/1	1			1/1+1	0					1	1/1	1	1/1	1			2/2	0
NA12878	CYP3A7	1/1			1/1	1	1/1	1			2/2	0			0													0
NA15245	CYP3A7	1C/1C			1/1	1	1/1	1			2/2	0			0													1	1/1	1	1/1	1			1C/1C	1
NA17074	CYP3A7	1/1			1/1	1	1/1	1			2/2	0			0													1	1/1	1	1/1	1			1/1+1	0
NA17204	CYP3A7	1/1			1/1	1	1/1	1			2/2	0			0													1	1/1	1	1/1	1			1/1	1
NA17227	CYP3A7	1/1			1/1	1	1/1	1			2/2	0			0													1	1/1	1	1/1	1			1/1	1
NA17234	CYP3A7	1/2			1/2	1	1/2	1			1/2	1			0													1	1/2	1	1/2	1			1/2+2+2	0
NA17235	CYP3A7	1/1			1/1	1	1/1	1			2/2	0			0													1	1/1	1	1/1	1			1/1	1
NA17244	CYP3A7	1/1			1/1	1	1/1	1			2/2	0			0													1	1/1	1	1/1	1			1/1+1+1	0
NA17448	CYP3A7	1/1			1/1	1	1/1	1			2/2	0			0													1	1/1	1	1/1	1			1/1	1
NA17454	CYP3A7	1/2			1/2	1	1/2	1			1/2	1			0													1	1/2	1	1/2	1			1/2	1
NA17641	CYP3A7	1/1			1/1	1	1/1	1			2/2	0			0													1	1/1	1	1/1	1			1/1+1	0
NA17642	CYP3A7	1/2			1/2	1	1/2	1			1/2	1			0													1	1/2	1	1/1	0			1/2	1
NA17657	CYP3A7	1/2			1/2	1	1/2	1			1/2	1			0													1	1/2	1	1/2	1			1/2	1
NA17658	CYP3A7	1/1			1/1	1	1/1	1			2/2	0			0													1	1/1	1	1/1	1			1/1	1
NA17660	CYP3A7	1/1			1/1	1	1/1	1			2/2	0			0													1	1/1	1	1/1	1			1/1	1
NA17673	CYP3A7	1/1			1/1	1	1/1	1			2/2	0			0													1	1/1	1	1/1	1			1/1	1
NA17679	CYP3A7	1/1			1/1	1	1/1	1			2/2	0			0													1	1/1	1	1/1	1			1/1	1
NA17702	CYP3A7	1/1			1/1	1	1/1	1			2/2	0			0													1	1/1	1	1/1	1			1/1	1
NA18484	CYP3A7	1/2			1/2	1	1/2	1			1/2	1			1	1/2	1	1/2	1			1/2	1					1	1/2	1	1/2	1			1/2	1
NA18509	CYP3A7	2/2			2/2	1	2/2	1			2/2	1			1	2/2	1	2/2	1			2/2	1					1	2/2	1	2/2	1			2/2+2	0
NA18518	CYP3A7	2/UNK	2/2	1	2/2	1	2/2	1			2/2	1			1	2/2	1	2/2	1			1E/2	0					1	2/2	1	2/2	1			[1E,2]/2	1
NA18519	CYP3A7	2/UNK	2/2	1	2/2	1	2/2	1			2/2	1			1	2/2	1	2/2	1			[1E,2]/2	1					1	2/2	1	2/2	1			2/2+2	0
NA18524	CYP3A7	1/1;1/2;2/2	1/2	1	1/2	1	1/2	1			1/2	1			1	1/2	1	1/2	1			1/2	1					1	1/2	1	1/2	1			1/2	1
NA18526	CYP3A7	2/2			2/2	1	2/2	1			2/2	1			1	2/2	1	2/2	1			2/2	1					1	2/2	1	2/2	1			2/2	1
NA18540	CYP3A7	1/2			1/2	1	1/2	1			1/2	1			1	1/2	1	1/2	1			1/2+2+2	0					1	1/2	1	1/2	1			1/2	1
NA18544	CYP3A7	1/2			1/2	1	1/2	1			1/2	1			1	1/2	1	1/2	1			1/2	1					1	1/2	1	1/2	1			1/2	1
NA18552	CYP3A7	1/1			1/1	1	1/1	1			2/2	0			1	1/1	1	1/1	1			1/1	1					1	1/1	1	1/1	1			2/2+2	0
NA18564	CYP3A7	1/1;1/2;2/2	2/2	1	2/2	1	2/2	1			2/2	1			1	2/2	1	2/2	1			2/2	1					1	2/2	1	2/2	1			2/2+2	0
NA18565	CYP3A7	1/2			1/2	1	1/2	1			1/2	1			1	1/2	1	1/2	1			1/2	1					1	1/2	1	1/2	1			1/2	1
NA18855	CYP3A7	1E/2			1/2	1	1/2	1			1/2	1			1	1/2	1	1/2	1			1/1E	0					1	1/2	1	1/2	1			1/[1E,2]	1
NA18861	CYP3A7	1/2			1/2	1	1/2	1			1/2	1			1	1/2	1	1/2	1			1/2	1					1	1/2	1	1/2	1			1/2	1
NA18868	CYP3A7	1/2			1/2	1	1/2	1			1/2	1			1	1/2	1	1/2	1			1/2	1					1	1/2	1	1/2	1			1/2	1
NA18942	CYP3A7	1/1			1/1	1	1/1	1			2/2	0			1	1/1	1	1/1	1			1/1+1	0					1	1/1	1	1/1	1			2/2	0
NA18952	CYP3A7	1/1			1/1	1	1/1	1			2/2	0			1	1/1	1	1/1	1			1/1	1					1	1/1	1	1/1	1			2/2	0
NA18959	CYP3A7	1/2			1/2	1	1/2	1			1/2	1			1	1/2	1	1/2	1			1/2	1					1	1/2	1	1/2	1			1/2	1
NA18966	CYP3A7	1/2			1/2	1	1/2	1			1/2	1			1	1/2	1	1/2	1			1/2	1					1	1/2	1	1/2	1			1/2	1
NA18973	CYP3A7	1/2			1/2	1	1/2	1			1/2	1			1	1/2	1	1/2	1			1/2	1					1	1/2	1	1/2	1			1/2	1
NA18980	CYP3A7	1/2			1/2	1	1/2	1			1/2	1			1	1/2	1	1/2	1			1/2	1					1	1/2	1	1/2	1			1/2	1
NA18992	CYP3A7	1/1			1/1	1	1/1	1			2/2	0			1	1/1	1	1/1	1			1/1	1					1	1/1	1	1/1	1			2/2	0
NA19003	CYP3A7	1/1			1/1	1	1/1	1			2/2	0			1	1/1	1	1/1	1			1/1	1					1	1/1	1	1/1	1			2/2	0
NA19007	CYP3A7	1/1			1/1	1	1/1	1			2/2	0			1	1/1	1	1/1	1			1/1	1					1	1/1	1	1/1	1			2/2	0
NA19095	CYP3A7	1/2			1/2	1	1/2	1			1/2	1			1	1/2	1	1/2	1			1/2	1					1	1/2	1	1/2	1			1/2	1
NA19109	CYP3A7	1/2			1/2	1	1/2	1			1/2	1			1	1/2	1	1/2	1			1/2	1					1	1/2	1	1/2	1			1/2	1
NA19122	CYP3A7	1/2			1/2	1	1/2	1			1/2	1			1	1/2	1	1/2	1			1/2	1					1	1/2	1	1/2	1			1/2	1
NA19143	CYP3A7	2/2			2/2	1	2/2	1			2/2	1			1	2/2	1	2/2	1			2/2	1					1	2/2	1	2/2	1			2/2	1
NA19147	CYP3A7	1/1			1/1	1	1/1	1			2/2	0			1	1/1	1	1/1	1			1/1	1					1	1/1	1	1/1	1			2/2+2	0
NA19174	CYP3A7	1E/2			1/2	1	1/2	1			1/2	1			1	1/2	1	1/2	1			1/1E	0					1	1/2	1	1/2	1			1/1E	0
NA19176	CYP3A7	1/1			1/1	1	1/1	1			2/2	0			1	1/1	1	1/1	1			1/1	1					1	1/1	1	1/1	1			1/1+1	0
NA19178	CYP3A7	1/1			1/1	1	1/1	1			2/2	0			1	1/1	1	1/1	1			1/1	1					1	1/1	1	1/1	1			1/1	1
NA19207	CYP3A7	1/2			1/2	1	1/2	1			1/2	1			1	1/2	1	1/2	1			1/2	1					1	1/2	1	1/2	1			1/2	1
NA19213	CYP3A7	1E/2			1/2	1	1/2	1			1/2	1			1	1/2	1	1/2	1			1/1E	0					1	1/2	1	1/2	1			1/2	1
NA19226	CYP3A7	2/UNK	2/2	1	2/2	1	2/2	1			2/2	1			1	2/2	1	2/2	1			1E/2	0					1	2/2	1	2/2	1			1E/2	0
NA19239	CYP3A7	1/2			1/2	1	1/2	1			1/2	1			1	1/2	1	1/2	1			1/2	1					1	1/2	1	1/2	1			1/2	1
NA19789	CYP3A7	1/1E			1/1	1	1/1	1			2/2	0			1	1/1	1	1/1	1			1/1E	1					1	1/1	1	1/1	1			2/2	0
NA19819	CYP3A7	1/2			1/2	1	1/2	1			1/2	1			1	1/2	1	1/2	1			1/2	1					1	1/2	1	1/2	1			1/2	1
NA19908	CYP3A7	1/2			1/2	1	1/2	1			1/2	1			1	1/2	1	1/2	1			1/2	1					1	1/2	1	1/2	1			1/2	1
NA19920	CYP3A7	2/2			2/2	1	2/2	1			2/2	1			1	2/2	1	2/2	1			2/2	1					1	2/2	1	2/2	1			2/2	1
NA20296	CYP3A7	1E/2			1/2	1	1/2	1			1/2	1			1	1/2	1	1/2	1			1/1E	0					1	1/2	1	1/2	1			1/2	1
NA20509	CYP3A7	1/1			1/1	1	1/1	1			2/2	0			1	1/1	1	1/1	1			1/1+1	0					1	1/1	1	1/1	1			2/2	0
NA23246	CYP3A7	1/1			1/1	1	1/1	1			2/2	0			0													1	1/1	1	1/1	1			1/1	1
NA23275	CYP3A7	2/2			2/2	1	2/2	1			2/2	1			0													1	2/2	1	2/2	1			2/2+2	0
NA23313	CYP3A7	1/1			1/1	1	1/1	1			2/2	0			0													0
NA23348	CYP3A7	1/1			1/1	1	1/1	1			2/2	0			0													1	1/1	1	1/1	1			1/1	1
NA23873	CYP3A7	1/1			1/1	1	1/1	1			2/2	0			0													0
NA23874	CYP3A7	1/1C			1/1	1	1/1	1			2/2	0			0													1	1/1	1	1/1	1			1/1	1
NA23877	CYP3A7	1/1			1/1	1	1/1	1			2/2	0			0													0
NA24008	CYP3A7	1/1			1/1	1	1/1	1			2/2	0			0													1	1/1	1	1/1	1			1/1+1	0
NA24009	CYP3A7	1E/2			1/2	1	1/2	1			1/2	1			0													0
NA24217	CYP3A7	1/2			1/2	1	1/2	1			1/2	1			0													0
HG00276	CYP4F2	1/1			1/1	1	1/1	1	1/1	1	1/1	1	1/1;1/5;1/7;5/5;5/7;7/7	1	1	1/1	1	1/1	1	1/1	1	1/1	1	5/7	0			1	1/1	1	1/1	1	1/1	1	1/1	1	5/7	0
HG00436	CYP4F2	2/3;1/4			1/4;2/3	1	1/4;2/3	1	1/1	0	2/3	1	1/1;1/2;1/3;1/4;2/2;2/3;2/4;3/3;3/4;4/4	1	1	1/4;2/3	1	1/4;2/3	1	2/3	1	1/3	0	1/4	1			0
HG00589	CYP4F2	1/1			1/1	1	1/1	1	1/1	1	1/1	1	1/1;1/7;7/7	1	1	1/1	1	1/1	1	1/1	1	1/1	1	1/7	0			1	1/1	1	1/1	1	1/1	1	1/1+1	0	1/7	0
HG01190	CYP4F2	1/3			1/3	1	1/3	1	1/3	1	1/3	1	1/1;1/3;3/3	1	1	1/3	1	1/3	1	1/3	1	1/3	1	1/3	1			1	1/3	1	1/3	1	1/3	1	1/3	1	1/3	1
NA06991	CYP4F2	1/1			1/1	1	1/1	1	1/1	1	1/1	1	1/1;1/6;1/7;6/6;6/7;7/7	1	1	1/1	1	1/1	1	1/1	1	1/1	1	1/7	0			1	1/1	1	1/1	1	1/1	1	1/1+1+1	0	1/7	0
NA06993	CYP4F2	1/1			1/1	1	1/1	1	1/1	1	1/1	1	1/1;1/6;1/7;6/6;6/7;7/7	1	0													0
NA07000	CYP4F2	3/4			3/4	1	3/4	1	3/3	0	3/3	0	1/1;1/2;1/3;1/4;2/2;2/3;2/4;3/3;3/4;4/4	1	1	3/4	1	3/4	1	3/3	0	3/3+3	0	3/4	1			1	3/4	1	3/4	1	3/3	0	3/3	0	3/4	1
NA07019	CYP4F2	1/3			1/3	1	1/3	1	1/3	1	1/3	1	1/1;1/3;3/3	1	1	1/3	1	1/3	1	1/3	1	1/3	1	1/3	1			1	1/3	1	1/3	1	1/3	1	1/3	1	1/3	1
NA07029	CYP4F2	3/4			3/4	1	3/4	1	3/3	0	3/3	0	1/1;1/2;1/3;1/4;2/2;2/3;2/4;3/3;3/4;4/4	1	1	3/4	1	3/4	1	3/3	0	3/3	0	3/4	1			1	3/4	1	3/4	1	3/3	0	3/3	0	3/4	1
NA07048	CYP4F2	1/1			1/1	1	1/1	1	1/1	1	1/1	1	1/1;1/7;7/7	1	0													0
NA07055	CYP4F2	1/1			1/1	1	1/1	1	1/1	1	1/1	1	1/1;1/7;7/7	1	1	1/1	1	1/1	1	1/1	1	1/1	1	7/7	0			1	1/1	1	1/1	1	1/1	1	1/1+1	0	7/7	0
NA07056	CYP4F2	3/4			3/4	1	3/4	1	3/3	0	3/3	0	1/1;1/2;1/3;1/4;2/2;2/3;2/4;3/3;3/4;4/4	1	1	3/4	1	3/4	1	3/3	0	3/3	0	3/4	1			1	3/4	1	3/4	1	3/3	0	3/3+3	0	3/4	1
NA07348	CYP4F2	1/1			1/1	1	1/1	1	1/1	1	1/1	1	1/1;1/10;10/10	1	1	1/1	1	1/1	1	1/1	1	1/1	1	1/10	0			1	1/1	1	1/1	1	1/1	1	1/1+1	0	1/10	0
NA07357	CYP4F2	1/1			1/1	1	1/1	1	1/1	1	1/1	1	1/1	1	1	1/1	1	1/1	1	1/1	1	1/1	1	1/1	1			1	1/1	1	1/1	1	1/1	1	1/1	1	1/1	1
NA07439	CYP4F2	1/2			1/2	1	1/2	1	1/2	1	1/2	1	1/1;1/2;2/2	1	0													1	1/2	1	1/2	1	1/2	1	1/2	1	1/2	1
NA10831	CYP4F2	1/1			1/1	1	1/1	1	1/1	1	1/1	1	1/1;1/7;7/7	1	1	1/1	1	1/1	1	1/1	1	1/1	1	7/7	0			1	1/1	1	1/1	1	1/1	1	1/1+1+1	0	7/7	0
NA10838	CYP4F2	1/1			1/1	1	1/1	1	1/1	1	1/1	1	1/1;1/7;1/10;7/7;7/10;10/10	1	0													0
NA10846	CYP4F2	1/3			1/3	1	1/3	1	1/3	1	1/3	1	1/1;1/3;1/7;3/3;3/7;7/7	1	0													0
NA10847	CYP4F2	1/1			1/1	1	1/1	1	1/1	1	1/1	1	1/1;1/6;1/7;6/6;6/7;7/7	1	1	1/1	1	1/1	1	1/1	1	1/1	1	7/7	0			1	1/1	1	1/1	1	1/1	1	1/1+1	0	7/7	0
NA10851	CYP4F2	1/1			1/1	1	1/1	1	1/1	1	1/1	1	1/1;1/7;1/10;7/7;7/10;10/10	1	1	1/1	1	1/1	1	1/1	1	1/1+1	0	7/10	0			1	1/1	1	1/1	1	1/1	1	1/1+1	0	7/10	0
NA10854	CYP4F2	1/3			1/3	1	1/3	1	1/3	1	1/3	1	1/1;1/3;3/3	1	1	1/3	1	1/3	1	1/3	1	1/3	1	1/3	1			1	1/3	1	1/3	1	1/3	1	1/3	1	1/3	1
NA10855	CYP4F2	1/1			1/1	1	1/1	1	1/1	1	1/1	1	1/1;1/5;5/5	1	0													0
NA10856	CYP4F2	1/1			1/1	1	1/1	1	1/1	1	1/1	1	1/1;1/7;7/7	1	0													0
NA10859	CYP4F2	2/3			1/4;2/3	1	1/4;2/3	1	2/3	1	1/3	0	1/1;1/2;1/3;1/4;2/2;2/3;2/4;3/3;3/4;4/4	1	0													0
NA10865	CYP4F2	1/1			1/1	1	1/1	1	1/1	1	1/1	1	1/1;1/10;10/10	1	0													0
NA11832	CYP4F2	1/1			1/1	1	1/1	1	1/1	1	1/1	1	1/1;1/5;1/7;5/5;5/7;7/7	1	1	1/1	1	1/1	1	1/1	1	1/1	1	5/7	0			1	1/1	1	1/1	1	1/1	1	1/1+1	0	5/7	0
NA11839	CYP4F2	1/3			1/3	1	1/3	1	1/3	1	1/3	1	1/1;1/3;1/5;3/3;3/5;5/5	1	1	1/3	1	1/3	1	1/3	1	1/3	1	3/5	0			1	1/3	1	1/3	1	1/3	1	1/3	1	3/5	0
NA11881	CYP4F2	2/3			1/4;2/3	1	1/4;2/3	1	1/1	0	1/3	0	1/1;1/2;1/3;1/4;2/2;2/3;2/4;3/3;3/4;4/4	1	0													0
NA11993	CYP4F2	1/3			1/3	1	1/3	1	1/3	1	1/3	1	1/1;1/3;1/7;3/3;3/7;7/7	1	1	1/3	1	1/3	1	1/3	1	1/3	1	3/7	0			1	1/3	1	1/3	1	1/3	1	3/1	1	3/7	0
NA12003	CYP4F2	1/1			1/1	1	1/1	1	1/1	1	1/1	1	1/1;1/10;10/10	1	1	1/1	1	1/1	1	1/1	1	1/1	1	1/10	0			1	1/1	1	1/1	1	1/1	1	1/1	1	1/10	0
NA12006	CYP4F2	1/3			1/3	1	1/3	1	1/1	0	1/3	1	1/1;1/3;1/6;1/7;3/3;3/6;3/7;6/6;6/7;7/7	1	1	1/3	1	1/3	1	1/3	1	1/3	1	3/7	0			1	1/3	1	1/3	1	1/3	1	1/3	1	3/7	0
NA12145	CYP4F2	1/1			1/1	1	1/1	1	1/1	1	1/1	1	1/1;1/7;7/7	1	1	1/1	1	1/1	1	1/1	1	1/1	1	7/7	0			1	1/1	1	1/1	1	1/1	1	1/1+1	0	7/7	0
NA12156	CYP4F2	2/3	1/4;2/3	3	1/4;2/3	1	1/4;2/3	1	2/3	1	1/3	0	1/1;1/2;1/3;1/4;1/6;1/7;2/2;2/3;2/4;2/6;2/7;3/3;3/4;3/6;3/7;4/4;4/6;4/7;6/6;6/7;7/7	1	1	1/4;2/3	1	1/4;2/3	1	2/3	1	1/3	0	4/7	0			1	1/4	1	1/4;2/3	1	2/3	1	1/[3,2]	0	4/7	0
NA12236	CYP4F2	1/1			1/1	1	1/1	1	1/1	1	1/1	1	1/1;1/7;7/7	1	0													1	1/1	1	1/1	1	1/1	1	1/1+1	0	7/7	0
NA12336	CYP4F2	1/1			1/1	1	1/1	1	1/1	1	1/1	1	1/1	1	0													0
NA12375	CYP4F2	1/1			1/1	1	1/1	1	1/1	1	1/1	1	1/1;1/7;7/7	1	0													0
NA12717	CYP4F2	1/3			1/3	1	1/3	1	1/1	0	1/3	1	1/1;1/3;3/3	1	1	1/3	1	1/3	1	1/3	1	1/3	1	1/3	1			1	3/3	0	1/3	1	1/3	1	1/3	1	1/3	1
NA12753	CYP4F2	1/1			1/1	1	1/1	1	1/1	1	1/1	1	1/1;1/6;1/7;6/6;6/7;7/7	1	0													0
NA12813	CYP4F2	1/3			1/3	1	1/3	1	1/1	0	1/3	1	1/1;1/3;1/10;3/3;3/10;10/10	1	1	1/3	1	1/3	1	1/3	1	1/3	1	3/10	0			1	1/3	1	1/3	1	1/3	1	1/3	1	3/10	0
NA12815	CYP4F2	1/3			1/3	1	1/3	1	1/1	0	1/3	1	1/1;1/3;1/6;1/7;3/3;3/6;3/7;6/6;6/7;7/7	1	0													0
NA12873	CYP4F2	1/1			1/1	1	1/1	1	1/1	1	1/1	1	1/1;1/5;1/7;5/5;5/7;7/7	1	1	1/1	1	1/1	1	1/1	1	1/1+1	0	5/7	0			1	1/1	1	1/1	1	1/1	1	1/1+1	0	5/7	0
NA12878	CYP4F2	1/1			1/1	1	1/1	1	1/1	1	1/1	1	1/1;1/6;1/7;6/6;6/7;7/7	1	0													0
NA12892	CYP4F2	1/1			1/1	1	1/1	1	1/1	1	1/1	1	1/1;1/5;1/6;1/7;5/5;5/6;5/7;6/6;6/7;7/7	1	0													0
NA15245	CYP4F2	1/1			1/1	1	1/1	1	1/1	1	1/1	1	1/1;1/7;7/7	1	0													1	1/1	1	1/1	1	1/1	1	1/1	1	1/7	0
NA17012	CYP4F2	1/1			1/1	1	1/1	1			1/1	1	1/1;1/7;7/7	1	0													0
NA17061	CYP4F2	2/3			1/4;2/3	1	1/4;2/3	1	1/1	0	1/3	0	1/1;1/2;1/3;1/4;1/7;2/2;2/3;2/4;2/7;3/3;3/4;3/7;4/4;4/7;7/7	1	0													0
NA17074	CYP4F2	2/3	1/4;2/3	3	1/4;2/3	1	1/4;2/3	1	1/1	0	2/3	1	1/1;1/2;1/3;1/4;2/2;2/3;2/4;3/3;3/4;4/4	1	0													1	1/4	1	1/4;2/3	1	2/3	1	3/2	1	1/4	1
NA17102	CYP4F2	2/3			1/4;2/3	1	1/4;2/3	1	2/3	1	1/3	0	1/1;1/2;1/3;1/4;2/2;2/3;2/4;3/3;3/4;4/4	1	0													1	2/3	1	1/4;2/3	1	2/3	1	3/2	1	2/3	1
NA17204	CYP4F2	1/1			1/1	1	1/1	1	1/1	1	1/1	1	1/1;1/7;7/7	1	0													1	1/1	1	1/1	1	1/1	1	1/1+1	0	1/7	0
NA17227	CYP4F2	2/3	1/4;2/3	3	1/4;2/3	1	1/4;2/3	1	2/3	1	2/3	1	1/1;1/2;1/3;1/4;1/7;2/2;2/3;2/4;2/7;3/3;3/4;3/7;4/4;4/7;7/7	1	0													1	1/4	1	1/4;2/3	1	2/3	1	[3,2]/1	0	4/7	0
NA17234	CYP4F2	1/1			1/1	1	1/1	1	1/1	1	1/1	1	1/1;1/5;5/5	1	0													1	1/1	1	1/1	1	1/1	1	1/1+1	0	1/5	0
NA17235	CYP4F2	1/1			1/1	1	1/1	1	1/1	1	1/1	1	1/1;1/6;1/7;1/10;6/6;6/7;6/10;7/7;7/10;10/10	1	0													1	1/1	1	1/1	1	1/1	1	1/1	1	7/10	0
NA17244	CYP4F2	1/1			1/1	1	1/1	1	1/1	1	1/1	1	1/1;1/7;7/7	1	0													1	1/1	1	1/1	1	1/1	1	1/1+1+1	0	7/7	0
NA17288	CYP4F2	1/3			1/3	1	1/3	1	1/1	0	1/3	1	1/1;1/3;1/7;3/3;3/7;7/7	1	0													0
NA17290	CYP4F2	3/3			3/3	1	3/3	1	3/3	1	3/3	1	1/1;1/3;3/3	1	0													0
NA17448	CYP4F2	3/3			3/3	1	3/3	1	3/3	1	3/3	1	1/1;1/3;3/3	1	0													1	3/3	1	3/3	1	3/3	1	3/3	1	3/3	1
NA17454	CYP4F2	1/3			1/3	1	1/3	1	1/3	1	1/3	1	1/1;1/3;3/3	1	0													1	1/3	1	1/3	1	1/3	1	1/3	1	1/3	1
NA17641	CYP4F2	1/1			1/1	1	1/1	1	1/1	1	1/1	1	1/1	1	0													1	1/1	1	1/1	1	1/1	1	1/1+1	0	1/1	1
NA17642	CYP4F2	1/1			1/1	1	1/1	1			1/1	1	1/1;1/5;1/6;1/7;5/5;5/6;5/7;6/6;6/7;7/7	1	0													1	1/1	1	1/1	1	1/1	1	1/1	1	5/7	0
NA17657	CYP4F2	2/3	1/4;2/3	3	1/4;2/3	1	1/4;2/3	1	2/3	1	1/3	0	1/1;1/2;1/3;1/4;1/7;2/2;2/3;2/4;2/7;3/3;3/4;3/7;4/4;4/7;7/7	1	0													1	1/4	1	1/4;2/3	1	2/3	1	3/2	1	4/7	0
NA17658	CYP4F2	2/3	1/4;2/3	3	1/4;2/3	1	1/4;2/3	1	2/3	1	2/3	1	1/1;1/2;1/3;1/4;1/7;2/2;2/3;2/4;2/7;3/3;3/4;3/7;4/4;4/7;7/7	1	0													1	1/4	1	1/4;2/3	1			2/3	1	4/7	0
NA17660	CYP4F2	1/1			1/1	1	1/1	1	1/1	1	1/1	1	1/1	1	0													1	1/1	1	1/1	1	1/1	1	1/1+1	0	1/1	1
NA17673	CYP4F2	1/1			1/1	1	1/1	1	1/1	1	1/1	1	1/1;1/6;1/7;6/6;6/7;7/7	1	0													1	1/1	1	1/1	1	1/1	1	1/1	1	1/7	0
NA17679	CYP4F2	2/3	1/4;2/3	3	1/4;2/3	1	1/4;2/3	1	1/3	0	2/3	1	1/1;1/2;1/3;1/4;1/7;2/2;2/3;2/4;2/7;3/3;3/4;3/7;4/4;4/7;7/7	1	0													1	1/4	1	1/4;2/3	1	2/3	1	[3,2]/1	0	4/7	0
NA17702	CYP4F2	1/1			1/1	1	1/1	1	1/1	1	1/1	1	1/1;1/7;7/7	1	0													1	1/1	1	1/1	1	1/1	1	1/1+1	0	1/7	0
NA18484	CYP4F2	1/2			1/2	1	1/2	1	1/2	1	1/2	1	1/1;1/2;1/6;1/7;2/2;2/6;2/7;6/6;6/7;7/7	1	1	1/2	1	1/2	1	1/2	1	1/2	1	2/7	0			1	1/2	1	1/2	1	1/1	0	1/2	1	2/6	0
NA18509	CYP4F2	2/3			1/4;2/3	1	1/4;2/3	1	2/3	1	2/3	1	1/1;1/2;1/3;1/4;1/7;2/2;2/3;2/4;2/7;3/3;3/4;3/7;4/4;4/7;7/7	1	1	1/4;2/3	1	1/4;2/3	1	2/3	1	2/3	1	4/7	0			1	1/4;2/3	1	1/4;2/3	1	2/3	1	3/2	1	4/7	0
NA18518	CYP4F2	1/2			1/2	1	1/2	1	1/1	0	1/2	1	1/1;1/2;2/2	1	1	1/2	1	1/2	1	1/2	1	1/2	1	1/2	1			1	1/2	1	1/2	1	1/2	1	1/2	1	1/2	1
NA18519	CYP4F2	2/3	1/4;2/3	3	1/4;2/3	1	1/4;2/3	1	1/3	0	1/3	0	1/1;1/2;1/3;1/4;2/2;2/3;2/4;3/3;3/4;4/4	1	1	1/4;2/3	1	1/4;2/3	1	2/3	1	2/3	1	1/4	0			1	1/4	1	1/4;2/3	1	2/3	1	1/[3,2]	0	1/4	1
NA18524	CYP4F2	1/3			1/3	1	1/3	1	1/3	1	1/3	1	1/1;1/3;1/6;1/7;3/3;3/6;3/7;6/6;6/7;7/7	1	1	1/3	1	1/3	1	1/3	1	1/3	1	3/7	0			1	1/3	1	1/3	1	1/3	1	1/3	1	3/7	0
NA18526	CYP4F2	1/3			1/3	1	1/3	1	1/3	1	1/3	1	1/1;1/3;1/7;3/3;3/7;7/7	1	1	1/3	1	1/3	1	1/3	1	1/3	1	3/7	0			1	1/3	1	1/3	1	1/3	1	1/3	1	3/7	0
NA18540	CYP4F2	1/3			1/3	1	1/3	1	1/1	0	1/3	1	1/1;1/3;1/6;1/7;3/3;3/6;3/7;6/6;6/7;7/7	1	1	1/3	1	1/3	1	1/3	1	1/3	1	3/7	0			1	1/3	1	1/3	1	1/3	1	1/3	1	3/7	0
NA18544	CYP4F2	1/1			1/1	1	1/1	1	1/1	1	1/1	1	1/1;1/7;7/7	1	1	1/1	1	1/1	1	1/1	1	1/1	1	1/7	0			1	1/1	1	1/1	1	1/1	1	1/1+1	0	1/7	0
NA18552	CYP4F2	1/3			1/3	1	1/3	1	1/3	1	1/3	1	1/1;1/3;3/3	1	1	1/3	1	1/3	1	1/3	1	1/3	1	1/3	1			1	1/3	1	1/3	1	1/3	1	1/3	1	1/3	1
NA18563	CYP4F2	1/1			1/1	1	1/1	1	1/1	1	1/1	1	1/1;1/6;1/7;6/6;6/7;7/7	1	0													0
NA18564	CYP4F2	3/4			3/4	1	3/4	1	3/3	0	3/3	0	1/1;1/2;1/3;1/4;2/2;2/3;2/4;3/3;3/4;4/4	1	1	3/4	1	3/4	1	3/3	0	3/3	0	3/4	1			1	3/4	1	3/4	1	3/3	0	3/3+3	0	3/4	1
NA18565	CYP4F2	1/1			1/1	1	1/1	1	1/1	1	1/1	1	1/1;1/7;7/7	1	1	1/1	1	1/1	1	1/1	1	1/1	1	7/7	0			1	1/1	1	1/1	1	1/1	1	1/1+1	0	7/7	0
NA18572	CYP4F2	1/3			1/3	1	1/3	1	1/3	1	1/3	1	1/1;1/3;3/3	1	0													0
NA18617	CYP4F2	1/1			1/1	1	1/1	1	1/1	1	1/1	1	1/1;1/7;7/7	1	1	1/1	1	1/1	1	1/1	1	1/1	1	1/7	0			1	1/1	1	1/1	1	1/1	1	1/1+1	0	1/7	0
NA18855	CYP4F2	1/1			1/1	1	1/1	1	1/1	1	1/1	1	1/1;1/5;5/5	1	1	1/1	1	1/1	1	1/1	1	1/1	1	1/5	0			1	1/1	1	1/1	1	1/1	1	1/1+1	0	1/5	0
NA18861	CYP4F2	1/1			1/1	1	1/1	1	1/1	1	1/1	1	1/1	1	1	1/1	1	1/1	1	1/1	1	1/1	1	1/1	1			1	1/1	1	1/1	1	1/1	1	1/1+1	0	1/1	1
NA18868	CYP4F2	1/1			1/1	1	1/1	1	1/1	1	1/1	1	1/1;1/5;5/5	1	1	1/1	1	1/1	1	1/1	1	1/1	1	1/5	0			1	1/1	1	1/1	1	1/1	1	1/1	1	1/5	0
NA18873	CYP4F2	1/1			1/1	1	1/1	1	1/1	1	1/1	1	1/1;1/6;1/7;1/9;6/6;6/7;6/9;7/7;7/9;9/9	1	0													0
NA18942	CYP4F2	1/1			1/1	1	1/1	1	1/1	1	1/1	1	1/1	1	1	1/1	1	1/1	1	1/1	1	1/1+1	0	1/1	1			1	1/1	1	1/1	1	1/1	1	1/1	1	1/1	1
NA18945	CYP4F2	1/1			1/1	1	1/1	1	1/1	1	1/1	1	1/1	1	0													0
NA18952	CYP4F2	1/1			1/1	1	1/1	1	1/1	1	1/1	1	1/1	1	1	1/1	1	1/1	1	1/1	1	1/1	1	1/1	1			1	1/1	1	1/1	1	1/1	1	1/1	1	1/1	1
NA18959	CYP4F2	1/1			1/1	1	1/1	1	1/1	1	1/1	1	1/1	1	1	1/1	1	1/1	1	1/1	1	1/1	1	1/1	1			1	1/1	1	1/1	1	1/1	1	1/1+1	0	1/1	1
NA18966	CYP4F2	1/3			1/3	1	1/3	1	1/3	1	1/3	1	1/1;1/3;3/3	1	1	1/3	1	1/3	1	1/3	1	1/3	1	1/3	1			1	1/3	1	1/3	1	1/3	1	1/3+3+3	0	1/3	1
NA18973	CYP4F2	1/1			1/1	1	1/1	1	1/1	1	1/1	1	1/1	1	1	1/1	1	1/1	1	1/1	1	1/1	1	1/1	1			1	1/1	1	1/1	1	1/1	1	1/1	1	1/1	1
NA18980	CYP4F2	1/1			1/1	1	1/1	1	1/1	1	1/1	1	1/1	1	1	1/1	1	1/1	1	1/1	1	1/1	1	1/1	1			1	1/1	1	1/1	1	1/1	1	1/1+1	0	1/1	1
NA18992	CYP4F2	1/1			1/1	1	1/1	1	1/1	1	1/1	1	1/1;1/7;7/7	1	1	1/1	1	1/1	1	1/1	1	1/1	1	1/7	0			1	1/1	1	1/1	1	1/1	1	1/1	1	1/7	0
NA19003	CYP4F2	1/1			1/1	1	1/1	1	1/1	1	1/1	1	1/1;1/6;1/7;6/6;6/7;7/7	1	1	1/1	1	1/1	1	1/1	1	1/1	1	1/7	0			1	1/1	1	1/1	1	1/1	1	1/1	1	1/7	0
NA19007	CYP4F2	1/3			1/3	1	1/3	1	1/1	0	1/3	1	1/1;1/3;3/3	1	1	1/3	1	1/3	1	1/3	1	1/3	1	1/3	1			1	1/3	1	1/3	1	1/3	1	1/3	1	1/3	1
NA19035	CYP4F2	1/3			1/3	1	1/3	1	1/3	1	1/3	1	1/1;1/3;1/5;3/3;3/5;5/5	1	0													0
NA19095	CYP4F2	1/3			1/3	1	1/3	1	1/3	1	1/3	1	1/1;1/3;3/3	1	1	1/3	1	1/3	1	1/3	1	1/3	1	1/3	1			1	1/3	1	1/3	1	1/3	1	1/3	1	1/3	1
NA19109	CYP4F2	1/1			1/1	1	1/1	1	1/1	1	1/1	1	1/1	1	1	1/1	1	1/1	1	1/1	1	1/1	1	1/1	1			1	1/1	1	1/1	1	1/1	1	1/1	1	1/1	1
NA19122	CYP4F2	1/2			1/2	1	1/2	1	1/2	1	1/2	1	1/1;1/2;1/6;1/7;2/2;2/6;2/7;6/6;6/7;7/7	1	1	1/2	1	1/2	1	1/2	1	1/2	1	2/6	0			1	1/2	1	1/2	1	1/2	1	1/2	1	2/6	0
NA19143	CYP4F2	1/1			1/1	1	1/1	1	1/1	1	1/1	1	1/1;1/5;5/5	1	1	1/1	1	1/1	1	1/1	1	1/1	1	1/5	0			1	1/1	1	1/1	1	1/1	1	1/1+1	0	1/5	0
NA19147	CYP4F2	1/1			1/1	1	1/1	1	1/1	1	1/1	1	1/1;1/7;7/7	1	1	1/1	1	1/1	1	1/1	1	1/1	1	1/7	0			1	1/1	1	1/1	1	1/1	1	1/1+1	0	1/7	0
NA19174	CYP4F2	1/1			1/1	1	1/1	1	1/1	1	1/1	1	1/1;1/7;7/7	1	1	1/1	1	1/1	1	1/1	1	1/1	1	1/7	0			1	1/1	1	1/1	1	1/1	1	1/1	1	1/7	0
NA19176	CYP4F2	1/1			1/1	1	1/1	1	1/1	1	1/1	1	1/1;1/5;1/10;5/5;5/10;10/10	1	1	1/1	1	1/1	1	1/1	1	1/1	1	5/10	0			1	1/1	1	1/1	1	1/1	1	1/1+1	0	5/10	0
NA19178	CYP4F2	1/1			1/1	1	1/1	1	1/1	1	1/1	1	1/1	1	1	1/1	1	1/1	1	1/1	1	1/1	1	1/1	1			1	1/1	1	1/1	1	1/1	1	1/1+1	0	1/1	1
NA19207	CYP4F2	1/1			1/1	1	1/1	1	1/1	1	1/1	1	1/1;1/7;1/8;7/7;7/8;8/8	1	1	1/1	1	1/1	1	1/1	1	1/1	1	1/8	0			1	1/1	1	1/1	1	1/1	1	1/1+1	0	1/8	0
NA19213	CYP4F2	1/1			1/1	1	1/1	1	1/1	1	1/1	1	1/1;1/6;1/7;6/6;6/7;7/7	1	1	1/1	1	1/1	1	1/1	1	1/1	1	7/7	0			1	1/1	1	1/1	1	1/1	1	1/1+1	0	7/7	0
NA19226	CYP4F2	1/2			1/2	1	1/2	1	1/1	0	1/2	1	1/1;1/2;1/7;2/2;2/7;7/7	1	1	1/2	1	1/2	1	1/2	1	1/2	1	2/7	0			1	1/2	1	1/2	1	1/2	1	1/2	1	2/7	0
NA19238	CYP4F2	1/2			1/2	1	1/2	1	1/1	0	1/2	1	1/1;1/2;1/5;2/2;2/5;5/5	1	0													0
NA19239	CYP4F2	1/1			1/1	1	1/1	1	1/1	1	1/1	1	1/1	1	1	1/1	1	1/1	1	1/1	1	1/1	1	1/1	1			1	1/1	1	1/1	1	1/1	1	1/1+1	0	1/1	1
NA19444	CYP4F2	1/2			1/2	1	1/2	1	1/1	0	1/2	1	1/1;1/2;2/2	1	0													0
NA19700	CYP4F2	1/2			1/2	1	1/2	1	1/2	1	1/2	1	1/1;1/2;1/6;1/7;2/2;2/6;2/7;6/6;6/7;7/7	1	0													0
NA19785	CYP4F2	3/3			3/3	1	3/3	1	3/3	1	3/3	1	1/1;1/3;3/3	1	0													0
NA19789	CYP4F2	2/3	1/4;2/3	3	1/4;2/3	1	1/4;2/3	1	2/3	1	2/3	1	1/1;1/2;1/3;1/4;1/6;1/7;2/2;2/3;2/4;2/6;2/7;3/3;3/4;3/6;3/7;4/4;4/6;4/7;6/6;6/7;7/7	1	1	1/4;2/3	1	1/4;2/3	1	2/3	1	1/[3,2]	0	4/7	0			1	1/4	1	1/4;2/3	1	2/3	1	1/[3,2]	0	4/7	0
NA19819	CYP4F2	2/3	1/4;2/3	3	1/4;2/3	1	1/4;2/3	1	1/2	0	2/3	1	1/1;1/2;1/3;1/4;2/2;2/3;2/4;3/3;3/4;4/4	1	1	1/4;2/3	1	1/4;2/3	1	2/3	1	1/3	0	1/4	0			1	1/4	1	1/4;2/3	1	2/3	1	1/[3,2]	0	1/4	1
NA19908	CYP4F2	2/3			1/4;2/3	1	1/4;2/3	1	1/1	0	1/3	0	1/1;1/2;1/3;1/4;2/2;2/3;2/4;3/3;3/4;4/4	1	1	1/4;2/3	1	1/4;2/3	1	2/3	1	1/3	0	2/3	1			1	1/4;2/3	1	1/4;2/3	1	2/3	1	1/[3,2]	0	2/3	1
NA19917	CYP4F2	1/2			1/2	1	1/2	1	1/2	1	1/2	1	1/1;1/2;1/5;2/2;2/5;5/5	1	1	1/2	1	1/2	1	1/2	1	1/2	1	2/5	0			1	1/2	1	1/2	1	1/2	1	1/2	1	2/5	0
NA19920	CYP4F2	1/1			1/1	1	1/1	1	1/1	1	1/1	1	1/1;1/6;1/7;6/6;6/7;7/7	1	1	1/1	1	1/1	1	1/1	1	1/1	1	1/7	0			1	1/1	1	1/1	1	1/1	1	1/1+1	0	1/7	0
NA20296	CYP4F2	1/1			1/1	1	1/1	1	1/1	1	1/1	1	1/1;1/5;5/5	1	1	1/1	1	1/1	1	1/1	1	1/1	1	1/5	0			1	1/1	1	1/1	1	1/1	1	1/1	1	1/5	0
NA20509	CYP4F2	1/1			1/1	1	1/1	1	1/1	1	1/1	1	1/1;1/7;7/7	1	1	1/1	1	1/1	1	1/1	1	1/1+1	0	1/7	0			1	1/1	1	1/1	1	1/1	1	1/1	1	1/7	0
NA21781	CYP4F2	1/1			1/1	1	1/1	1	1/1	1	1/1	1	1/1	1	1	1/1	1	1/1	1	1/1	1	1/1	1	1/1	1			1	1/1	1	1/1	1	1/1	1	1/1	1	1/1	1
NA23090	CYP4F2	1/1			1/1	1	1/1	1	1/1	1	1/1	1	1/1	1	0													0
NA23093	CYP4F2	3/3			3/3	1	3/3	1	3/3	1	3/3	1	1/1;1/3;3/3	1	0													0
NA23246	CYP4F2	1/3			1/3	1	1/3	1	1/1	0	1/3	1	1/1;1/3;3/3	1	0													1	1/3	1	1/3	1	1/3	1	1/3	1	1/3	1
NA23275	CYP4F2	1/1			1/1	1	1/1	1	1/1	1	1/1	1	1/1;1/5;5/5	1	0													1	1/1	1	1/1	1	1/1	1	1/1+1	0	1/5	0
NA23296	CYP4F2	1/3			1/3	1	1/3	1	1/3	1	1/3	1	1/1;1/3;1/7;3/3;3/7;7/7	1	0													0
NA23297	CYP4F2	1/1			1/1	1	1/1	1	1/1	1	1/1	1	1/1;1/6;1/7;6/6;6/7;7/7	1	0													0
NA23313	CYP4F2	1/1			1/1	1	1/1	1	1/1	1	1/1	1	1/1;1/5;1/6;1/7;5/5;5/6;5/7;6/6;6/7;7/7	1	0													0
NA23348	CYP4F2	2/3	1/4;2/3	3	1/4;2/3	1	1/4;2/3	1	1/3	0	2/3	1	1/1;1/2;1/3;1/4;2/2;2/3;2/4;3/3;3/4;4/4	1	0													1	1/4	1	1/4;2/3	1	2/3	1	2/3	1	1/4	1
NA23405	CYP4F2	1/3			1/3	1	1/3	1	1/1	0	1/3	1	1/1;1/3;3/3	1	0													0
NA23872	CYP4F2	2/3			1/4;2/3	1	1/4;2/3	1	1/2	0	1/3	0	1/1;1/2;1/3;1/4;2/2;2/3;2/4;3/3;3/4;4/4	1	0													0
NA23873	CYP4F2	2/3			1/4;2/3	1	1/4;2/3	1	1/3	0	2/3	1	1/1;1/2;1/3;1/4;2/2;2/3;2/4;3/3;3/4;4/4	1	0													0
NA23874	CYP4F2	1/1			1/1	1	1/1	1	1/1	1	1/1	1	1/1;1/7;7/7	1	0													1	1/1	1	1/1	1	1/1	1	1/1	1	1/7	0
NA23877	CYP4F2	1/1			1/1	1	1/1	1	1/1	1	1/1	1	1/1	1	0													0
NA23878	CYP4F2	1/3			1/3	1	1/3	1	1/1	0	1/3	1	1/1;1/3;1/6;1/7;3/3;3/6;3/7;6/6;6/7;7/7	1	0													0
NA23881	CYP4F2	1/1			1/1	1	1/1	1	1/1	1	1/1	1	1/1	1	0													0
NA24008	CYP4F2	2/3	1/4;2/3	3	1/4;2/3	1	1/4;2/3	1	2/3	1	2/3	1	1/1;1/2;1/3;1/4;1/6;1/7;2/2;2/3;2/4;2/6;2/7;3/3;3/4;3/6;3/7;4/4;4/6;4/7;6/6;6/7;7/7	1	0													1	1/4	1	1/4;2/3	1	1/3	0	3/2	1	4/7	0
NA24009	CYP4F2	2/3			1/4;2/3	1	1/4;2/3	1	2/3	1	2/3	1	1/1;1/2;1/3;1/4;2/2;2/3;2/4;3/3;3/4;4/4	1	0													0
NA24027	CYP4F2	1/1			1/1	1	1/1	1	1/1	1	1/1	1	1/1;1/7;7/7	1	0													1	1/1	1	1/1	1	1/1	1	1/1+1+1	0	1/7	0
NA24217	CYP4F2	3/3			3/3	1	3/3	1	3/3	1	3/3	1	1/1;1/3;3/3	1	0													0
HG00276	DPYD	1/1			1/1	1	1/1	1			S12/S12	0			1	1/1	1	1/1	1			1/1	1					1	1/1	1	1/1	1			1/1	1
HG00436	DPYD	1/1			1/1	1	1/1	1			1/1	1			1	1/1	1	1/1	1			1/1	1					0
HG00589	DPYD	5/rs17376848			5/rs17376848	1	5/rs17376848	1			1/1	0			1	5/rs17376848	1	5/rs17376848	1			1/1	0					1	5/rs17376848	1	5/rs17376848	1			1/1	0
HG01190	DPYD	1/9			1/9	1	1/9	1			1/1	0			1	1/9	1	1/9	1			1/1	0					1	1/9	1	1/9	1			1/1+1	0
NA06991	DPYD	4/rs67376798			4/rs67376798	1	4/rs67376798	1			1/S2	0			1	4/rs67376798	1	4/rs67376798	1			1/S2	0					1	4/rs67376798	1	4/rs67376798	1			1/S2+2+2	0
NA06993	DPYD	4/5			4/5	1	4/5	1			1/1	0			0													0
NA07000	DPYD	1/1			1/1	1	1/1	1			1/1	1			1	1/1	1	1/1	1			1/1+1	0					1	1/1	1	1/1	1			1/1	1
NA07019	DPYD	1/1			1/1	1	1/1	1			1/1	1			1	1/1	1	1/1	1			1/1	1					1	1/1	1	1/1	1			1/1	1
NA07029	DPYD	1/1			1/1	1	1/1	1			1/1	1			1	1/1	1	1/1	1			1/1	1					1	1/1	1	1/1	1			1/1	1
NA07048	DPYD	1/rs67376798			1/rs67376798	1	1/rs67376798	1			1/S2	1			0													0
NA07055	DPYD	5/rs67376798			5/rs67376798	1	5/rs67376798	1			1/S2	0			1	5/rs67376798	1	5/rs67376798	1			1/S2	0					1	5/rs67376798	1	5/rs67376798	1			1/S2	0
NA07056	DPYD	1/1			1/1	1	1/1	1			1/1	1			1	1/1	1	1/1	1			1/1	1					1	1/1	1	1/1	1			1/1	1
NA07348	DPYD	6/9;9/rs17376848			9*/rs17376848	1	9*/rs17376848	1			1/6	0			1	6*/9	1	6*/9	1			1/6	0					1	9*/rs17376848	1	9*/rs17376848	1			1/6	0
NA07357	DPYD	5/6*;5/9*;9/rs17376848*			5*/9	1	5*/9	1			1/6	0			1	9*/rs17376848	1	9*/rs17376848	1			1/6	0					1	5*/6	1	5*/9	1			1/1	0
NA07439	DPYD	1/1			1/1	1	1/1	1			1/1	1			0													1	1/1	1	1/1	1			1/1+1	0
NA10831	DPYD	9/rs17376848*;5/rs17376848*;5/9*			9*/rs17376848	1	9*/rs17376848	1			1/1	0			1	9*/rs17376848	1	9*/rs17376848	1			1/1	0					1	9*/rs17376848	1	5*/rs17376848	1			1/1+1	0
NA10838	DPYD	1/1			1/1	1	1/1	1			1/1	1			0													0
NA10846	DPYD	1/9	*	3	9/rs17376848	1	9/rs17376848	1			1/1	0			0													0
NA10847	DPYD	5/9			5/9	1	5/9	1			1/1	0			1	5/9	1	5/9	1			1/1	0					1	5/9	1	5/9	1			1/1	0
NA10851	DPYD	1/9	*	3	9/rs2297595	1	9/rs2297595	1			S12/S12	0			1	9/rs2297595	1	9/rs2297595	1			1/1+1	0					1	9/rs2297595	1	9/rs2297595	1			1/1+1	0
NA10854	DPYD	1/1			1/1	1	1/1	1			1/1	1			1	1/1	1	1/1	1			1/1	1					1	1/1	1	1/1	1			1/1	1
NA10855	DPYD	1/5			1/5	1	1/5	1			1/1	0			0													0
NA10856	DPYD	5/6			5/6	1	5/6	1			1/6	0			0													0
NA10859	DPYD	5/6*	*	3	6*/9	1	9*/rs17376848	0			1/6	1			0													0
NA10865	DPYD	1/1			1/1	1	1/1	1			1/1	1			0													0
NA11832	DPYD	1/5	*	3	5/rs2297595	1	5/rs2297595	1			1/5	1			1	5/rs2297595	1	5/rs2297595	1			1/5	1					1	5/rs2297595	1	5/rs2297595	1			1/1	0
NA11839	DPYD	1/5			1/5	1	1/5	1			1/1	0			1	1/5	1	1/5	1			1/1	0					1	1/5	1	1/5	1			1/1	0
NA11881	DPYD	1/5			1/5	1	1/5	1			1/1	0			0													0
NA11993	DPYD	1/5	*	3	5/rs201615754*	1	5/rs201615754	1			1/1	0			1	5*/rs201615754	1	5/rs201615754	1			1/1	0					1	5*/rs201615754	1	5/rs201615754	1			1/1+1	0
NA12003	DPYD	1/1			1/1	1	1/1	1			1/1	1			1	1/1	1	1/1	1			1/1	1					1	1/1	1	1/1	1			1/1	1
NA12006	DPYD	1/1			1/1	1	1/1	1			1/1	1			1	1/1	1	1/1	1			1/1	1					1	1/1	1	1/1	1			1/1	1
NA12145	DPYD	1/9			1/9	1	1/9	1			1/1	0			1	1/9	1	1/9	1			1/1	0					1	1/9	1	1/9	1			1/1+1	0
NA12156	DPYD	1/5	*	3	5/rs17376848	1	5/rs17376848	1			1/S9	1			1	5/rs17376848	1	5/rs17376848	1			1/1	0					1	5/rs17376848	1	5/rs17376848	1			1/1+1	0
NA12236	DPYD	9/9			9/9	1	9/9	1			9A/9A	1			0													1	9/9	1	9/9	1			9A/9Ax2	0
NA12336	DPYD	1/9	*	3	9/rs2297595	1	9/rs2297595	1			S4/S12	1			0													0
NA12375	DPYD	1/1			1/1	1	1/1	1			1/1	1			0													0
NA12717	DPYD	1/1			1/1	1	1/1	1			1/1	1			1	1/1	1	1/1	1			1/1	1					1	1/1	1	1/1	1			1/1	1
NA12753	DPYD	1/9	*	3	9*/rs17376848	1	9*/rs17376848	1			1/1	0			0													0
NA12813	DPYD	1/4			1/4	1	1/4	1			1/1	0			1	1/4	1	1/4	1			1/1	0					1	1/4	1	1/1	0			1/1+1	0
NA12815	DPYD	1/9	*	3	9/rs2297595	1	9/rs2297595	1			1/1	0			0													0
NA12873	DPYD	1/1			1/1	1	1/1	1			1/1	1			1	1/1	1	1/1	1			1/1+1	0					1	1/1	1	1/1	1			1/1	1
NA12878	DPYD	4/5			4/5	1	4/5	1			1/1	0			0													0
NA12892	DPYD	1/5			1/5	1	1/5	1			S12/S12	0			0													0
NA15245	DPYD	1/5			1/5	1	1/5	1			1/1	0			0													1	1/5	1	1/5	1			1/1	0
NA17012	DPYD	1/5	*	3	5*/rs17376848	1	5*/rs17376848	1			1/1	0			0													0
NA17061	DPYD	1/9			1/9	1	1/9	1			1/1	0			0													0
NA17074	DPYD	1/5			1/5	1	1/5	1			1/1	0			0													1	1/5	1	1/5	1			1/1+1	0
NA17102	DPYD	5/9			5/9	1	5/9	1			1/1	0			0													1	5/9	1	5/9	1			1/1+1	0
NA17204	DPYD	5/9	*	3	9/9*	1	9/9*	1			5/9A	1			0													1	9/9*	1	9/9*	1			9A/9A	1
NA17227	DPYD	1/1	*	3	1/1*	1	1/1*	1			S12/S12	1			0													1	1/HapB3	1	1/HapB3	1			1/1	1
NA17234	DPYD	1/6			1/6	1	1/6	1			1/6	1			0													1	1/6	1	1/6	1			1/6	1
NA17235	DPYD	1/5			1/5	1	1/5	1			1/1	0			0													1	1/5	1	1/5	1			1/1	0
NA17244	DPYD	1/9			1/9	1	1/9	1			1/1	0			0													1	1/9	1	1/9	1			1/1+1+1	0
NA17288	DPYD	5/9			5/9	1	5/9	1			1/1	0			0													0
NA17290	DPYD	1/5	*	3	5/rs17376848	1	5/rs17376848	1			1/1	0			0													0
NA17448	DPYD	5/9	*	3	5*/9	1	5*/9	1			5/S12	1			0													1	9*/rs2297595	1	9*/rs2297595	1			1/1	0
NA17454	DPYD	1/5	*	3	5/rs17376848	1	5/rs17376848	1			1/1	0			0													1	5/rs17376848	1	5/rs17376848	1			1/1	0
NA17641	DPYD	1/5			1/5	1	1/5	1			1/1	0			0													1	1/5	1	1/5	1			1/1	0
NA17642	DPYD	5/9	*	3	9*/rs45589337	1	9*/rs45589337	1			1/1	0			0													1	5*/9	1	5*/9	1			1/1	0
NA17657	DPYD	1/5			1/5	1	1/5	1			1/S12	1			0													1	1/5	1	1/5	1			1/1	0
NA17658	DPYD	1/9	*	3	9/rs2297595	1	9/rs2297595	1			S12/S12	1			0													1	9/rs2297595	1	9/rs2297595	1			1/1	0
NA17660	DPYD	5/9			5/9	1	5/9	1			1/5	0			0													1	5/9	1	5/9	1			1/1	0
NA17673	DPYD	4/6	*	3	4*/6	1	4*/6	1			1/6	0			0													1	4*/rs17376848	1	4*/rs17376848	1			1/6	0
NA17679	DPYD	1/9			1/9	1	1/9	1			S12/S12	0			0													1	1/9	1	1/9	1			1/1	0
NA17702	DPYD	1/9	*	3	9/rs17376848	1	9/rs17376848	1			1/S9	1			0													1	9/rs17376848	1	9/rs17376848	1			1/S9	1
NA18484	DPYD	1/9			1/9	1	1/9	1			1/1	0			1	1/9	1	1/9	1			1/1+1	0					1	1/9	1	1/9	1			1/1	0
NA18509	DPYD	5/9*			5*/9	1	5*/9	1			5/9A	0			1	5*/9	1	5*/9	1			9A/9A	0					1	5*/9	1	5*/9	1			9A/9Ax2	0
NA18518	DPYD	5/9			5/9	1	5/9	1			1/1	0			1	5/9	1	5/9	1			1/1	0					1	5/9	1	5/9	1			1/1+1	0
NA18519	DPYD	9/9			9/9	1	9/9	1			9A/9A	1			1	9/9	1	9/9	1			9A/9A	1					1	9/9	1	9/9	1			9A/9A	1
NA18524	DPYD	1/5	*	3	5/rs17376848	1	5/rs17376848	1			1/1	0			1	5/rs17376848	1	5/rs17376848	1			1/1+1	0					1	5/rs17376848	1	5/rs17376848	1			1/1	0
NA18526	DPYD	1/1			1/1	1	1/1	1			1/1	1			1	1/1	1	1/1	1			1/1	1					1	1/1	1	1/1	1			1/1	1
NA18540	DPYD	1/9	*	3	9/rs2297595	1	9/rs2297595	1			1/S4	1			1	9/rs2297595	1	9/rs2297595	1			1/1+1	0					1	9/rs2297595	1	9/rs2297595	1			1/1	0
NA18544	DPYD	1/5	*	3	5/rs17376848	1	5/rs17376848	1			1/S9	1			1	5/rs17376848	1	5/rs17376848	1			1/1	0					1	5/rs17376848	1	5/rs17376848	1			1/1	0
NA18552	DPYD	1/5			1/5	1	1/5	1			1/1	0			1	1/5	1	1/5	1			1/1	0					1	1/5	1	1/5	1			1/1	0
NA18563	DPYD	1/5			1/5	1	1/5	1			1/1	0			0													0
NA18564	DPYD	5/9			5/9	1	5/9	1			1/1	0			1	5/9	1	5/9	1			1/1	0					1	5/9	1	5/9	1			1/1+1	0
NA18565	DPYD	1/1			1/1	1	1/1	1			1/1	1			1	1/1	1	1/1	1			1/1	1					1	1/1	1	1/1	1			1/1	1
NA18572	DPYD	1/5			1/5	1	1/5	1			1/1	0			0													0
NA18617	DPYD	1/1			1/1	1	1/1	1			1/1	1			1	1/1	1	1/1	1			1/1	1					1	1/1	1	1/1	1			1/1+1	0
NA18855	DPYD	9/9	*	3	9/rs61622928*	1	9/rs61622928*	1			9A/9A	1			1	9/rs61622928*	1	9/rs61622928*	1			9A/9A	1					1	9/rs61622928*	1	9/rs61622928*	1			9A/9A	1
NA18861	DPYD	1/9			1/9	1	1/9	1			S12/S12	0			1	1/9	1	1/9	1			1/1	0					1	1/9	1	1/9	1			1/1	0
NA18868	DPYD	1/9			1/9	1	1/9	1			S12/S12	0			1	1/9	1	1/9	1			1/1	0					1	1/9	1	1/9	1			1/1	0
NA18873	DPYD	5/9	*	3	9*/rs115232898	1	9*/rs115232898	1			5/S6	1			0													0
NA18942	DPYD	1/1			1/1	1	1/1	1			1/1	1			1	1/1	1	1/1	1			1/1+1	0					1	1/1	1	1/1	1			1/1	1
NA18945	DPYD	1/1	*	3	1/rs17376848	1	1/rs17376848	1			1/1	1			0													0
NA18952	DPYD	5/5			5/5	1	5/5	1			1/1	0			1	5/5	1	5/5	1			1/1	0					1	5/5	1	5/5	1			1/1	0
NA18959	DPYD	1/1			1/1	1	1/1	1			S12/S12	0			1	1/1	1	1/1	1			1/1	1					1	1/1	1	1/1	1			1/1	1
NA18966	DPYD	1/1	*	3	rs17376848/rs188052243	1	rs17376848/rs188052243	1			1/1	1			1	rs17376848/rs188052243	1	rs17376848/rs188052243	1			1/1	1					1	rs17376848/rs188052243	1	rs17376848/rs188052243	1			1/1+1	0
NA18973	DPYD	5/9			5/9*	1	5/9*	1			1/1	0			1	5/9*	1	5/9*	1			1/1	0					1	5/9*	1	5/9*	1			1/1	0
NA18980	DPYD	1/5			1/5	1	1/5	1			1/1	0			1	1/5	1	1/5	1			1/1+1	0					1	1/5	1	1/5	1			1/1	0
NA18992	DPYD	1/1	*	3	1/rs17376848	1	1/rs17376848	1			1/1	1			1	1/rs17376848	1	1/rs17376848	1			1/1	1					1	1/rs17376848	1	1/rs17376848	1			1/1	1
NA19003	DPYD	1/1			1/1	1	1/1	1			1/1	1			1	1/1	1	1/1	1			1/1	1					1	1/1	1	1/1	1			1/1	1
NA19007	DPYD	1/1			1/1	1	1/1	1			1/1	1			1	1/1	1	1/1	1			1/1	1					1	1/1	1	1/1	1			1/1	1
[truncated: 318 more rows]

## Sheet: PacBio
Sample	Dataset	Gene	Validated	Updated Call		Aldy		Astrolabe
HG00118	F	CYP1A2	*1K/*1V			1/1	1
HG00130	F	CYP1A2	*1F/*1F			1/1	1
HG00185	M	CYP1A2	*1F/*1F			1/1	1
HG00246	M	CYP1A2	*1F/*1F			1/1	1
HG00276	F	CYP1A2	*1A/*1F			1/1	1
HG00332	F	CYP1A2	*1F/*1F			1/1	1
HG00437	F	CYP1A2	*1A/*1L;*1C/*1V			1/1	1
HG01083	F	CYP1A2	*1A/*1L;*1C/*1V			1/1	1
HG01086	F	CYP1A2	*1F/*1F			1/1	1
HG01089	F	CYP1A2	*1A/*1L;*1C/*1V			1/1	1
HG01170	M	CYP1A2	*1F/*1L			1/1	1
HG01359	M	CYP1A2	*1A/*1L;*1C/*1V			1/1	1
HG01438	F	CYP1A2	*1A/*1F			1/1	1
HG01765	M	CYP1A2	*1A/*1A			1/1	1
HG01845	F	CYP1A2	*1A/*1A			1/1	1
HG02087	F	CYP1A2	*1L/*1V			1/1	1
HG02649	F	CYP1A2	*1A/*1F			1/1	1
HG03166	M	CYP1A2	*1A/*1L;*1C/*1V			1/1	1
HG03624	M	CYP1A2	*1F/*1F			1/1	1
NA12762	M	CYP1A2	*1F/*1F			1/1	1
NA19315	F	CYP1A2	*1L/*1L			1/1	1
NA19452	M	CYP1A2	*1A/*1A			1/1	1
NA19466	1	CYP1A2	*1A/*1L;*1C/*1V	1/21	1	1/21	1
NA20901	M	CYP1A2	*1F/*1V			1/1	1
HG00118	F	CYP2B6	*1/*6			1/6	1
HG00130	1	CYP2B6	*1/*1	1/4	1	1/4	1
HG00185	M	CYP2B6	*1/*1			1/1	1
HG00246	1	CYP2B6	*1/*1	1/2	1	1/2	1
HG00276	1	CYP2B6	*1/*1	2/4	1	2/4	1
HG00332	F	CYP2B6	*1/*1			1/1	1
HG00437	F	CYP2B6	*1/*6			1/6	1
HG01083	F	CYP2B6	*6/*6			6/6	1
HG01086	F	CYP2B6	*1/*1			1/1	1
HG01089	F	CYP2B6	*6/*6			6/6	1
HG01170	M	CYP2B6	*6/*6			6/6	1
HG01359	M	CYP2B6	*1/*6			1/6	1
HG01438	F	CYP2B6	*1/*1			1/1	1
HG01765	1	CYP2B6	*1/*1	1/11	1	1/11	1
HG01845	F	CYP2B6	*1/*1			1/1	1
HG02087	F	CYP2B6	*1/*1			1/1	1
HG02649	F	CYP2B6	*1/*6			1/6	1
HG03166	M	CYP2B6	*1/*1			1/1	1
HG03624	M	CYP2B6	*6/*6			6/6	1
NA12762	1	CYP2B6	*1/*6	4/6	1	4/6	1
NA19315	1	CYP2B6	*1/*1	1/18	1	1/18	1
NA19452	1	CYP2B6	*1/*1	22/27	1	22*/27	1
NA19466	M	CYP2B6	*1/*6			1/6	1
NA20901	1	CYP2B6	*1/*6	5/6	1	5/6	1
HG00118	F	CYP2C19	*1/*1			1/1	1	1/1;1/36;1/37;36/36;36/37;37/37	1
HG00130	F	CYP2C19	*17/*2			2/17	1	1/1;1/36;1/37;36/36;36/37;37/37	0
HG00185	M	CYP2C19	*1/*1			1/1	1	1/1;1/36;1/37;36/36;36/37;37/37	1
HG00246	M	CYP2C19	*1/*1			1/1	1	1/1;1/36;1/37;36/36;36/37;37/37	1
HG00276	F	CYP2C19	*1/*1			1/1	1	1/1;1/36;1/37;36/36;36/37;37/37	1
HG00332	F	CYP2C19	*1/*17			1/17	1	1/1;1/36;1/37;36/36;36/37;37/37	0
HG00437	F	CYP2C19	*2/*2			2/2	1	1/1;1/36;1/37;36/36;36/37;37/37	0
HG01083	F	CYP2C19	*1/*2			1/2	1	1/1;1/36;1/37;36/36;36/37;37/37	0
HG01086	F	CYP2C19	*1/*1			1/1	1	1/1;1/36;1/37;36/36;36/37;37/37	1
HG01089	F	CYP2C19	*1/*10			1/10	1	1/1;1/36;1/37;36/36;36/37;37/37	0
HG01170	M	CYP2C19	*1/*1			1/1	1	1/1;1/36;1/37;36/36;36/37;37/37	1
HG01359	1	CYP2C19	*1/*1	1/38	1	1/38	1	1/1;1/36;1/37;36/36;36/37;37/37	1
HG01438	F	CYP2C19	*17/*22			17/22	1	1/1;1/36;1/37;36/36;36/37;37/37	0
HG01765	M	CYP2C19	*1/*4			1/4	1	1/1;1/36;1/37;36/36;36/37;37/37	0
HG01845	1	CYP2C19	*1/*2	2/38	1	2/38	1	1/1;1/36;1/37;36/36;36/37;37/37	0
HG02087	F	CYP2C19	*1/*2			1/2	1	1/1;1/36;1/37;36/36;36/37;37/37	0
HG02649	F	CYP2C19	*1/*2			1/2	1	1/1;1/36;1/37;36/36;36/37;37/37	0
HG03166	1	CYP2C19	*1/*1	1/39	1	1/39	1	1/1;1/36;1/37;36/36;36/37;37/37	0
HG03624	M	CYP2C19	*1/*1			1/1	1	1/1;1/36;1/37;36/36;36/37;37/37	1
NA12762	M	CYP2C19	*1/*8			1/8.002	1	1/1;1/36;1/37;36/36;36/37;37/37	0
NA19315	F	CYP2C19	*1/*2			1/2	1	1/1;1/36;1/37;36/36;36/37;37/37	0
NA19452	1	CYP2C19	*16/*17	17^16/35	1	17*/35	1	1/1;1/36;1/37;36/36;36/37;37/37	0
NA19466	M	CYP2C19	*1/*9			1/9	1	1/1;1/36;1/37;36/36;36/37;37/37	0
NA20901	M	CYP2C19	*1/*24			1/24	1		1
HG00118	F	CYP2C8	*1/*1			1/1	1	1/1	1
HG00130	F	CYP2C8	*1/*1			1/1	1	1/1	1
HG00185	M	CYP2C8	*1/*1			1/1	1	1/1	1
HG00246	M	CYP2C8	*1/*1			1/1	1	1/1	1
HG00276	F	CYP2C8	*1/*3			1/3	1	1/1	0
HG00332	F	CYP2C8	*1/*3			1/3	1	1/1	0
HG00437	F	CYP2C8	*1/*1			1/1	1	1/1	1
HG01083	F	CYP2C8	*1/*1			1/1	1	1/1	1
HG01086	F	CYP2C8	*1/*3			1/3	1	1/1	0
HG01089	1	CYP2C8	*1/*2	2/15	1	2/15	1	1/1	0
HG01170	M	CYP2C8	*1/*1			1/1	1	1/1	1
HG01359	M	CYP2C8	*1/*1			1/1	1	1/1	1
HG01438	F	CYP2C8	*1/*1			1/1	1	1/1	1
HG01765	M	CYP2C8	*3/*3			3/3	1	1/1	0
HG01845	F	CYP2C8	*1/*1			1/1	1	1/1	1
HG02087	F	CYP2C8	*1/*1			1/1	1	1/1	1
HG02649	F	CYP2C8	*1/*1			1/1	1	1/1	1
HG03166	1	CYP2C8	*1/*2	2/17	1	2/17	1	1/1	0
HG03624	M	CYP2C8	*1/*3			1/3	1	1/1	0
NA12762	M	CYP2C8	*1/*3			1/3	1	1/1	0
NA19315	F	CYP2C8	*1/*1			1/1	1	1/1	1
NA19452	M	CYP2C8	*1/*2			1/2	1	1/1	0
NA19466	M	CYP2C8	*1/*1			1/1	1	1/1	1
NA20901	M	CYP2C8	*1/*1			1/1	1		1
HG00118	F	CYP2C9	*1/*1			1/1	1	1/1	1
HG00130	F	CYP2C9	*1/*1			1/1	1	1/1	1
HG00185	M	CYP2C9	*1/*3			1/3	1	1/1;1/3;3/3	1
HG00246	M	CYP2C9	*1/*1			1/1	1	1/1	1
HG00276	F	CYP2C9	*1/*2			1/2	1	1/1;1/2;2/2	1
HG00332	F	CYP2C9	*1/*2			1/2	1	1/1;1/2;2/2	1
HG00437	F	CYP2C9	*1/*1			1/1	1	1/1	1
HG01083	F	CYP2C9	*1/*1			1/1	1	1/1	1
HG01086	F	CYP2C9	*1/*2			1/2	1	1/1;1/2;2/2	1
HG01089	1	CYP2C9	*1/*11	9/11	1	9/11	1	9/11	1
HG01170	M	CYP2C9	*1/*5			1/5	1	1/1;1/5;5/5	1
HG01359	M	CYP2C9	*1/*3			1/3	1	1/1;1/3;3/3	1
HG01438	F	CYP2C9	*1/*1			1/1	1	1/1	1
HG01765	M	CYP2C9	*2/*2			2/2	1	1/1;1/2;2/2	1
HG01845	F	CYP2C9	*1/*3			1/3	1	1/1;1/3;3/3	1
HG02087	F	CYP2C9	*1/*13			1/13	1	1/1;1/13;13/13	1
HG02649	F	CYP2C9	*1/*1			1/1	1	1/1	1
HG03166	M	CYP2C9	*5/*6			5/6	1	1/1;1/5;5/5	0
HG03624	M	CYP2C9	*1/*2			1/2	1	1/1;1/2;2/2	1
NA12762	1	CYP2C9	*1/*2	2/9	1	2/9	1	1/1;1/2;1/9;2/2;2/9;9/9	1
NA19315	F	CYP2C9	*1/*8			1/8	1	1/1;1/8;8/8	1
NA19452	M	CYP2C9	*1/*1			1/1	1	1/1	1
NA19466	1	CYP2C9	*1/*1	1/9	1	1/9	1	1/1;1/9;9/9	1
NA20901	M	CYP2C9	*1/*1			1/1	1		1
HG00118	F	CYP2D6	*1/*41			1/41	1	1/2	0
HG00130	F	CYP2D6	*2/*4			2/4	1	2/4	1
HG00185	M	CYP2D6	*1/*2			1+1/2	0	1/2	1
HG00246	1	CYP2D6	*2/*4	(2,65?)/4+(68?)	3	65/68+4	1	2/4	1
HG00276	F	CYP2D6	*4/*5			4/5	1	4/4	0
HG00332	F	CYP2D6	*1/*1			1/1	1	1/1	1
HG00437	F	CYP2D6	*36+*10/*36+*10			36+10/36+10	1	10/10	0
HG01083	1	CYP2D6	*1/*2	1/163	1	1/163	1	1/2	1
HG01086	F	CYP2D6	*1/*31			1/31	1	1/31	1
HG01089	F	CYP2D6	*1/*4			1/4	1	1/4	1
HG01170	M	CYP2D6	*1/*5			1/5	1	1/1	0
HG01359	M	CYP2D6	*1/*4			1/4.028	1	39/4	0
HG01438	F	CYP2D6	*1/*1x2			1/1+1	1	1/1	0
HG01765	1	CYP2D6	*2/*9	9/35	1	9/35	1	1/1;1/2;1/5;1/11;1/17;1/31;1/34;1/35;1/38;1/39;1/41;1/45;1/46;1/59;1/10;1/4;1/6;1/29;1/70;1/1E;2/2;2/5;2/11;2/17;2/31;2/34;2/35;2/38;2/39;2/41;2/45;2/46;2/59;2/10;2/4;2/6;2/29;2/70;2/1E;5/5;5/11;5/17;5/31;5/34;5/35;5/38;5/39;5/41;5/45;5/46;5/59;5/10;5/4;5/6;5/29;5/70;5/1E;11/11;11/17;11/31;11/34;11/35;11/38;11/39;11/41;11/45;11/46;11/59;11/10;11/4;11/6;11/29;11/70;11/1E;17/17;17/31;17/34;17/35;17…	0
HG01845	1	CYP2D6	*2/*14	10/14	1	10/14	1	2/10	0
HG02087	F	CYP2D6	*36+*10/*36+*10			36+10/36+10	1	10/10	0
HG02649	F	CYP2D6	*1/*2			1/2	1	1/2	1
HG03166	1	CYP2D6	*17/*30;*2/*40	2/40	1	2/40	1	2/2	0
HG03624	M	CYP2D6	*1/*2x2			1/2	0	1/2	0
NA12762	M	CYP2D6	*1/*3			1/3	1	1/1	0
NA19315	F	CYP2D6	*1/*29			1/29	1	39/29	0
NA19452	1	CYP2D6	*17/*4	4+4/17	3	4C+4C/17	1	2/64	0
NA19466	1	CYP2D6	*1/*17	17/43	1	17/43	1	2/43	0
NA20901	M	CYP2D6	*1/*1			1/1	1		1
HG00118	F	CYP3A4	*22/*22			22/22	1
HG00130	1	CYP3A4	*22/*3	1/37;3/22	3	1/37	1
HG00185	1	CYP3A4	*22/*3	1/37;3/22	3	1/37	1
HG00246	M	CYP3A4	*1/*1			1/1	1
HG00276	F	CYP3A4	*1/*2			1/2	1
HG00332	F	CYP3A4	*1/*1			1/1	1
HG00437	F	CYP3A4	*1/*1			1/1	1
HG01083	F	CYP3A4	*1/*1			1/1	1
HG01086	1	CYP3A4	*1/*1	1/36	1	1/36	1
HG01089	1	CYP3A4	*1/*1B	1/36	1	1/36	1
HG01170	1	CYP3A4	*1/*1	1/36	1	1/36	1
HG01359	1	CYP3A4	*1/*1B	1/36	1	1/36	1
HG01438	F	CYP3A4	*1/*1			1/1	1
HG01765	M	CYP3A4	*1/*1B			1/1	1
HG01845	F	CYP3A4	*1/*1			1/1	1
HG02087	F	CYP3A4	*1/*1			1/1	1
HG02649	1	CYP3A4	*1/*1	1/36	1	1/36	1
HG03166	1	CYP3A4	*1B/*1B	36/36	1	36/36	1
HG03624	1	CYP3A4	*1/*1	1/36	1	1/36	1
NA12762	1	CYP3A4	*1/*1	1/36	1	1/36	1
NA19315	1	CYP3A4	*1B/*12	12/36	1	12/36	1
NA19452	1	CYP3A4	*1B/*1B	36/36	1	36/36	1
NA19466	1	CYP3A4	*1/*1	36/36	1	36/36	1
NA20901	1	CYP3A4	*1B/*1B	36/36	1	36/36	1
HG00118	F	CYP3A5	*3/*3			3/3	1
HG00130	F	CYP3A5	*3/*3			3/3	1
HG00185	M	CYP3A5	*3/*3			3/3	1
HG00246	M	CYP3A5	*3/*3			3/3	1
HG00276	F	CYP3A5	*3/*3			3/3	1
HG00332	F	CYP3A5	*3/*3			3/3	1
HG00437	F	CYP3A5	*3/*3			3/3	1
HG01083	F	CYP3A5	*3/*3			3/3	1
HG01086	F	CYP3A5	*1/*3			1/3	1
HG01089	F	CYP3A5	*1/*3			1/3	1
HG01170	M	CYP3A5	*1/*3			1/3	1
HG01359	M	CYP3A5	*1/*3			1/3	1
HG01438	F	CYP3A5	*3/*3			3/3	1
HG01765	M	CYP3A5	*3/*3			3/3	1
HG01845	F	CYP3A5	*1/*3			1/3	1
HG02087	F	CYP3A5	*1/*3			1/3	1
HG02649	F	CYP3A5	*3/*3			3/3	1
HG03166	M	CYP3A5	*6/*6			6/6	1
HG03624	M	CYP3A5	*1/*3			1/3	1
NA12762	M	CYP3A5	*3/*3			3/3	1
NA19315	F	CYP3A5	*1/*1			1/1	1
NA19452	M	CYP3A5	*1/*7			1/7	1
NA19466	M	CYP3A5	*1/*1			1/1	1
NA20901	M	CYP3A5	*1/*3			1/3	1
HG00118	F	CYP4F2	*3/*3			3/3	1	1/1	0
HG00130	F	CYP4F2	*1/*1			1/1	1	1/1	1
HG00185	M	CYP4F2	*1/*1			1/1	1	1/1	1
HG00246	M	CYP4F2	*1/*1			1/1	1	1/1	1
HG00276	F	CYP4F2	*1/*1			1/1	1	1/1	1
HG00332	F	CYP4F2	*1/*3			1/3	1	1/1	0
HG00437	F	CYP4F2	*1/*1			1/1	1	1/1	1
HG01083	F	CYP4F2	*1/*1			1/1	1	1/1	1
HG01086	F	CYP4F2	*1/*3			1/3	1	1/1	0
HG01089	F	CYP4F2	*1/*1			1/1	1	1/1	1
HG01170	M	CYP4F2	*1/*3			1/3	1	1/1	0
HG01359	M	CYP4F2	*1/*3			1/3	1	1/1	0
HG01438	F	CYP4F2	*1/*1			1/1	1	1/1	1
HG01765	M	CYP4F2	*1/*3			1/3	1	1/1	0
HG01845	F	CYP4F2	*1/*3			1/3	1	1/1	0
HG02087	F	CYP4F2	*1/*1			1/1	1	1/1	1
HG02649	F	CYP4F2	*1/*1			1/1	1	1/1	1
HG03166	M	CYP4F2	*1/*3			1/3	1	1/1	0
HG03624	M	CYP4F2	*1/*3			1/3	1	1/1	0
NA12762	M	CYP4F2	*1/*3			1/3	1	1/1	0
NA19315	F	CYP4F2	*1/*3			1/3	1	1/1	0
NA19452	M	CYP4F2	*1/*1			1/1	1	1/1	1
NA19466	M	CYP4F2	*1/*1			1/1	1	1/1	1
NA20901	M	CYP4F2	*1/*1			1/1	1		1
HG00118	1	DPYD	*1/rs67376798	9/rs67376798	3	9/rs67376798	1
HG00130	1	DPYD	*1/*1	4/9	3	4/9	1
HG00185	1	DPYD	*1/*2	2/5	3	2A/5	1
HG00246	1	DPYD	*1/*1	1/9	3	1/9	1
HG00276	F	DPYD	*1/*1			1/1	1
HG00332	F	DPYD	*1/*13			1/13	1
HG00437	1	DPYD	*1/*1	1/rs17376848	3	1/rs17376848	1
HG01083	1	DPYD	*1/*1	1/5	3	1/5	1
HG01086	1	DPYD	*1/*1	5/9	3	5/9	1
HG01089	1	DPYD	*1/*1	9/rs17376848	3	9/rs17376848	1
HG01170	M	DPYD	*1/*1			1/1	1
HG01359	M	DPYD	*1/*1			1/1	1
HG01438	1	DPYD	*1/*1	1/rs17376848	3	1/rs17376848	1
HG01765	1	DPYD	*1/*1	4^9/5	3	4*/5	1
HG01845	1	DPYD	*1/*1	1/5	3	1/5	1
HG02087	1	DPYD	*1/*1	5/5	3	5/5	1
HG02649	1	DPYD	*1/*1	9/9	3	9/9	1
HG03166	1	DPYD	*1/*1	1/9	3	1/9	1
HG03624	1	DPYD	*1/*1	1/9	3	1/9	1
NA12762	1	DPYD	*1/*1	5/rs17376848	3	5/rs17376848	1
NA19315	1	DPYD	*1/*1	5/9	3	5/9*	1
NA19452	1	DPYD	*1/*1	5/9	3	5*/9	1
NA19466	1	DPYD	*1/*1	9/rs114096998	3	9/rs114096998	1
NA20901	1	DPYD	*1/*1	1/5	3	1/5	1
HG00118	F	NUDT15	*1/*1			1/1	1
HG00130	F	NUDT15	*1/*1			1/1	1
HG00185	M	NUDT15	*1/*1			1/1	1
HG00246	M	NUDT15	*1/*1			1/1	1
HG00276	F	NUDT15	*1/*1			1/1	1
HG00332	F	NUDT15	*1/*1			1/1	1
HG00437	F	NUDT15	*1/*5			1/5	1
HG01083	F	NUDT15	*1/*1			1/1	1
HG01086	F	NUDT15	*1/*2;*3			2/9	?
HG01089	F	NUDT15	*1/*1			1/1	1
HG01170	M	NUDT15	*1/*1			1/1	1
HG01359	M	NUDT15	*1/*4			1/4	1
HG01438	F	NUDT15	*1/*1			1/1	1
HG01765	M	NUDT15	*1/*1			1/1	1
HG01845	F	NUDT15	*1/*1			1/1	1
HG02087	F	NUDT15	*1/*1			1/1	1
HG02649	F	NUDT15	*1/*1			1/1	1
HG03166	M	NUDT15	*1/*1			1/1	1
HG03624	M	NUDT15	*1/*1			1/1	1
NA12762	M	NUDT15	*1/*1			1/1	1
NA19315	F	NUDT15	*1/*1			1/1	1
NA19452	M	NUDT15	*1/*1			1/1	1
NA19466	M	NUDT15	*1/*1			1/1	1
NA20901	M	NUDT15	*1/*1			1/1	1
HG00118	1	SLCO1B1	*1/*1	1/14	1	1/14	1	1/1;1/1B;1/2;1/3;1/4;1/5;1/6;1/7;1/8;1/9;1/10;1/11;1/12;1/13;1/14;1/15;1/16;1/17;1/18;1/19;1/20;1/21;1/22;1/23;1/24;1/25;1/26;1/27;1/28;1/29;1/30;1/31;1/32;1/33;1/34;1/35;1/36;1/NV_1;1B/1B;1B/2;1B/3;1B/4;1B/5;1B/6;1B/7;1B/8;1B/9;1B/10;1B/11;1B/12;1B/13;1B/14;1B/15;1B/16;1B/17;1B/18;1B/19;1B/20;1B/21;1B/22;1B/23;1B/24;1B/25;1B/26;1B/27;1B/28;1B/29;1B/30;1B/31;1B/32;1B/33;1B/34;1B/35;1B/36;1B/NV_1;…	1
HG00130	F	SLCO1B1	*1/*1			1/1	1	1/1;1/1B;1/2;1/3;1/4;1/5;1/6;1/7;1/8;1/9;1/10;1/11;1/12;1/13;1/14;1/15;1/16;1/17;1/18;1/19;1/20;1/21;1/22;1/23;1/24;1/25;1/26;1/27;1/28;1/29;1/30;1/31;1/32;1/33;1/34;1/35;1/36;1/NV_1;1B/1B;1B/2;1B/3;1B/4;1B/5;1B/6;1B/7;1B/8;1B/9;1B/10;1B/11;1B/12;1B/13;1B/14;1B/15;1B/16;1B/17;1B/18;1B/19;1B/20;1B/21;1B/22;1B/23;1B/24;1B/25;1B/26;1B/27;1B/28;1B/29;1B/30;1B/31;1B/32;1B/33;1B/34;1B/35;1B/36;1B/NV_1;…	1
HG00185	M	SLCO1B1	*1/*1			1B/1B	1	1/1;1/1B;1/2;1/3;1/4;1/5;1/6;1/7;1/8;1/9;1/10;1/11;1/12;1/13;1/14;1/15;1/16;1/17;1/18;1/19;1/20;1/21;1/22;1/23;1/24;1/25;1/26;1/27;1/28;1/29;1/30;1/31;1/32;1/33;1/34;1/35;1/36;1/NV_1;1B/1B;1B/2;1B/3;1B/4;1B/5;1B/6;1B/7;1B/8;1B/9;1B/10;1B/11;1B/12;1B/13;1B/14;1B/15;1B/16;1B/17;1B/18;1B/19;1B/20;1B/21;1B/22;1B/23;1B/24;1B/25;1B/26;1B/27;1B/28;1B/29;1B/30;1B/31;1B/32;1B/33;1B/34;1B/35;1B/36;1B/NV_1;…	1
HG00246	M	SLCO1B1	*1/*1			1/1	1	1/1;1/1B;1/2;1/3;1/4;1/5;1/6;1/7;1/8;1/9;1/10;1/11;1/12;1/13;1/14;1/15;1/16;1/17;1/18;1/19;1/20;1/21;1/22;1/23;1/24;1/25;1/26;1/27;1/28;1/29;1/30;1/31;1/32;1/33;1/34;1/35;1/36;1/NV_1;1B/1B;1B/2;1B/3;1B/4;1B/5;1B/6;1B/7;1B/8;1B/9;1B/10;1B/11;1B/12;1B/13;1B/14;1B/15;1B/16;1B/17;1B/18;1B/19;1B/20;1B/21;1B/22;1B/23;1B/24;1B/25;1B/26;1B/27;1B/28;1B/29;1B/30;1B/31;1B/32;1B/33;1B/34;1B/35;1B/36;1B/NV_1;…	1
HG00276	1	SLCO1B1	*1/*5	1/15	1	1/15	1	1/1;1/1B;1/2;1/3;1/4;1/5;1/6;1/7;1/8;1/9;1/10;1/11;1/12;1/13;1/14;1/15;1/16;1/17;1/18;1/19;1/20;1/21;1/22;1/23;1/24;1/25;1/26;1/27;1/28;1/29;1/30;1/31;1/32;1/33;1/34;1/35;1/36;1/NV_1;1B/1B;1B/2;1B/3;1B/4;1B/5;1B/6;1B/7;1B/8;1B/9;1B/10;1B/11;1B/12;1B/13;1B/14;1B/15;1B/16;1B/17;1B/18;1B/19;1B/20;1B/21;1B/22;1B/23;1B/24;1B/25;1B/26;1B/27;1B/28;1B/29;1B/30;1B/31;1B/32;1B/33;1B/34;1B/35;1B/36;1B/NV_1;…	1
HG00332	1	SLCO1B1	*1/*5	1/15	1	1B/15	1	1/1;1/1B;1/2;1/3;1/4;1/5;1/6;1/7;1/8;1/9;1/10;1/11;1/12;1/13;1/14;1/15;1/16;1/17;1/18;1/19;1/20;1/21;1/22;1/23;1/24;1/25;1/26;1/27;1/28;1/29;1/30;1/31;1/32;1/33;1/34;1/35;1/36;1/NV_1;1B/1B;1B/2;1B/3;1B/4;1B/5;1B/6;1B/7;1B/8;1B/9;1B/10;1B/11;1B/12;1B/13;1B/14;1B/15;1B/16;1B/17;1B/18;1B/19;1B/20;1B/21;1B/22;1B/23;1B/24;1B/25;1B/26;1B/27;1B/28;1B/29;1B/30;1B/31;1B/32;1B/33;1B/34;1B/35;1B/36;1B/NV_1;…	1
HG00437	F	SLCO1B1	*1/*1			1B/1B	1	1/1;1/1B;1/2;1/3;1/4;1/5;1/6;1/7;1/8;1/9;1/10;1/11;1/12;1/13;1/14;1/15;1/16;1/17;1/18;1/19;1/20;1/21;1/22;1/23;1/24;1/25;1/26;1/27;1/28;1/29;1/30;1/31;1/32;1/33;1/34;1/35;1/36;1/NV_1;1B/1B;1B/2;1B/3;1B/4;1B/5;1B/6;1B/7;1B/8;1B/9;1B/10;1B/11;1B/12;1B/13;1B/14;1B/15;1B/16;1B/17;1B/18;1B/19;1B/20;1B/21;1B/22;1B/23;1B/24;1B/25;1B/26;1B/27;1B/28;1B/29;1B/30;1B/31;1B/32;1B/33;1B/34;1B/35;1B/36;1B/NV_1;…	1
HG01083	1	SLCO1B1	*1/*1	1/14	1	1B/14	1	1/1;1/1B;1/2;1/3;1/4;1/5;1/6;1/7;1/8;1/9;1/10;1/11;1/12;1/13;1/14;1/15;1/16;1/17;1/18;1/19;1/20;1/21;1/22;1/23;1/24;1/25;1/26;1/27;1/28;1/29;1/30;1/31;1/32;1/33;1/34;1/35;1/36;1/NV_1;1B/1B;1B/2;1B/3;1B/4;1B/5;1B/6;1B/7;1B/8;1B/9;1B/10;1B/11;1B/12;1B/13;1B/14;1B/15;1B/16;1B/17;1B/18;1B/19;1B/20;1B/21;1B/22;1B/23;1B/24;1B/25;1B/26;1B/27;1B/28;1B/29;1B/30;1B/31;1B/32;1B/33;1B/34;1B/35;1B/36;1B/NV_1;…	1
HG01086	F	SLCO1B1	*1/*1			1/1	1	1/1;1/1B;1/2;1/3;1/4;1/5;1/6;1/7;1/8;1/9;1/10;1/11;1/12;1/13;1/14;1/15;1/16;1/17;1/18;1/19;1/20;1/21;1/22;1/23;1/24;1/25;1/26;1/27;1/28;1/29;1/30;1/31;1/32;1/33;1/34;1/35;1/36;1/NV_1;1B/1B;1B/2;1B/3;1B/4;1B/5;1B/6;1B/7;1B/8;1B/9;1B/10;1B/11;1B/12;1B/13;1B/14;1B/15;1B/16;1B/17;1B/18;1B/19;1B/20;1B/21;1B/22;1B/23;1B/24;1B/25;1B/26;1B/27;1B/28;1B/29;1B/30;1B/31;1B/32;1B/33;1B/34;1B/35;1B/36;1B/NV_1;…	1
HG01089	F	SLCO1B1	*1/*1			1/1	1	1/1;1/1B;1/2;1/3;1/4;1/5;1/6;1/7;1/8;1/9;1/10;1/11;1/12;1/13;1/14;1/15;1/16;1/17;1/18;1/19;1/20;1/21;1/22;1/23;1/24;1/25;1/26;1/27;1/28;1/29;1/30;1/31;1/32;1/33;1/34;1/35;1/36;1/NV_1;1B/1B;1B/2;1B/3;1B/4;1B/5;1B/6;1B/7;1B/8;1B/9;1B/10;1B/11;1B/12;1B/13;1B/14;1B/15;1B/16;1B/17;1B/18;1B/19;1B/20;1B/21;1B/22;1B/23;1B/24;1B/25;1B/26;1B/27;1B/28;1B/29;1B/30;1B/31;1B/32;1B/33;1B/34;1B/35;1B/36;1B/NV_1;…	1
HG01170	M	SLCO1B1	*1/*1			1B/1B	1	1/1;1/1B;1/2;1/3;1/4;1/5;1/6;1/7;1/8;1/9;1/10;1/11;1/12;1/13;1/14;1/15;1/16;1/17;1/18;1/19;1/20;1/21;1/22;1/23;1/24;1/25;1/26;1/27;1/28;1/29;1/30;1/31;1/32;1/33;1/34;1/35;1/36;1/NV_1;1B/1B;1B/2;1B/3;1B/4;1B/5;1B/6;1B/7;1B/8;1B/9;1B/10;1B/11;1B/12;1B/13;1B/14;1B/15;1B/16;1B/17;1B/18;1B/19;1B/20;1B/21;1B/22;1B/23;1B/24;1B/25;1B/26;1B/27;1B/28;1B/29;1B/30;1B/31;1B/32;1B/33;1B/34;1B/35;1B/36;1B/NV_1;…	1
HG01359	M	SLCO1B1	*1/*1			1/1	1	1/1;1/1B;1/2;1/3;1/4;1/5;1/6;1/7;1/8;1/9;1/10;1/11;1/12;1/13;1/14;1/15;1/16;1/17;1/18;1/19;1/20;1/21;1/22;1/23;1/24;1/25;1/26;1/27;1/28;1/29;1/30;1/31;1/32;1/33;1/34;1/35;1/36;1/NV_1;1B/1B;1B/2;1B/3;1B/4;1B/5;1B/6;1B/7;1B/8;1B/9;1B/10;1B/11;1B/12;1B/13;1B/14;1B/15;1B/16;1B/17;1B/18;1B/19;1B/20;1B/21;1B/22;1B/23;1B/24;1B/25;1B/26;1B/27;1B/28;1B/29;1B/30;1B/31;1B/32;1B/33;1B/34;1B/35;1B/36;1B/NV_1;…	1
HG01438	1	SLCO1B1	*1/*5	1/15	1	1B/15	1	1/1;1/1B;1/2;1/3;1/4;1/5;1/6;1/7;1/8;1/9;1/10;1/11;1/12;1/13;1/14;1/15;1/16;1/17;1/18;1/19;1/20;1/21;1/22;1/23;1/24;1/25;1/26;1/27;1/28;1/29;1/30;1/31;1/32;1/33;1/34;1/35;1/36;1/NV_1;1B/1B;1B/2;1B/3;1B/4;1B/5;1B/6;1B/7;1B/8;1B/9;1B/10;1B/11;1B/12;1B/13;1B/14;1B/15;1B/16;1B/17;1B/18;1B/19;1B/20;1B/21;1B/22;1B/23;1B/24;1B/25;1B/26;1B/27;1B/28;1B/29;1B/30;1B/31;1B/32;1B/33;1B/34;1B/35;1B/36;1B/NV_1;…	1
HG01765	M	SLCO1B1	*1/*1			1B/1B	1	1/1;1/1B;1/2;1/3;1/4;1/5;1/6;1/7;1/8;1/9;1/10;1/11;1/12;1/13;1/14;1/15;1/16;1/17;1/18;1/19;1/20;1/21;1/22;1/23;1/24;1/25;1/26;1/27;1/28;1/29;1/30;1/31;1/32;1/33;1/34;1/35;1/36;1/NV_1;1B/1B;1B/2;1B/3;1B/4;1B/5;1B/6;1B/7;1B/8;1B/9;1B/10;1B/11;1B/12;1B/13;1B/14;1B/15;1B/16;1B/17;1B/18;1B/19;1B/20;1B/21;1B/22;1B/23;1B/24;1B/25;1B/26;1B/27;1B/28;1B/29;1B/30;1B/31;1B/32;1B/33;1B/34;1B/35;1B/36;1B/NV_1;…	1
HG01845	F	SLCO1B1	*1/*1			1B/1B	1	1/1;1/1B;1/2;1/3;1/4;1/5;1/6;1/7;1/8;1/9;1/10;1/11;1/12;1/13;1/14;1/15;1/16;1/17;1/18;1/19;1/20;1/21;1/22;1/23;1/24;1/25;1/26;1/27;1/28;1/29;1/30;1/31;1/32;1/33;1/34;1/35;1/36;1/NV_1;1B/1B;1B/2;1B/3;1B/4;1B/5;1B/6;1B/7;1B/8;1B/9;1B/10;1B/11;1B/12;1B/13;1B/14;1B/15;1B/16;1B/17;1B/18;1B/19;1B/20;1B/21;1B/22;1B/23;1B/24;1B/25;1B/26;1B/27;1B/28;1B/29;1B/30;1B/31;1B/32;1B/33;1B/34;1B/35;1B/36;1B/NV_1;…	1
HG02087	F	SLCO1B1	*1/*1			1/1B	1	1/1;1/1B;1/2;1/3;1/4;1/5;1/6;1/7;1/8;1/9;1/10;1/11;1/12;1/13;1/14;1/15;1/16;1/17;1/18;1/19;1/20;1/21;1/22;1/23;1/24;1/25;1/26;1/27;1/28;1/29;1/30;1/31;1/32;1/33;1/34;1/35;1/36;1/NV_1;1B/1B;1B/2;1B/3;1B/4;1B/5;1B/6;1B/7;1B/8;1B/9;1B/10;1B/11;1B/12;1B/13;1B/14;1B/15;1B/16;1B/17;1B/18;1B/19;1B/20;1B/21;1B/22;1B/23;1B/24;1B/25;1B/26;1B/27;1B/28;1B/29;1B/30;1B/31;1B/32;1B/33;1B/34;1B/35;1B/36;1B/NV_1;…	1
HG02649	1	SLCO1B1	*1/*5	1/15	1	1/15	1	1/1;1/1B;1/2;1/3;1/4;1/5;1/6;1/7;1/8;1/9;1/10;1/11;1/12;1/13;1/14;1/15;1/16;1/17;1/18;1/19;1/20;1/21;1/22;1/23;1/24;1/25;1/26;1/27;1/28;1/29;1/30;1/31;1/32;1/33;1/34;1/35;1/36;1/NV_1;1B/1B;1B/2;1B/3;1B/4;1B/5;1B/6;1B/7;1B/8;1B/9;1B/10;1B/11;1B/12;1B/13;1B/14;1B/15;1B/16;1B/17;1B/18;1B/19;1B/20;1B/21;1B/22;1B/23;1B/24;1B/25;1B/26;1B/27;1B/28;1B/29;1B/30;1B/31;1B/32;1B/33;1B/34;1B/35;1B/36;1B/NV_1;…	1
HG03166	1	SLCO1B1	*1/*1	1/14	1	1B/14	1	1/1;1/1B;1/2;1/3;1/4;1/5;1/6;1/7;1/8;1/9;1/10;1/11;1/12;1/13;1/14;1/15;1/16;1/17;1/18;1/19;1/20;1/21;1/22;1/23;1/24;1/25;1/26;1/27;1/28;1/29;1/30;1/31;1/32;1/33;1/34;1/35;1/36;1/NV_1;1B/1B;1B/2;1B/3;1B/4;1B/5;1B/6;1B/7;1B/8;1B/9;1B/10;1B/11;1B/12;1B/13;1B/14;1B/15;1B/16;1B/17;1B/18;1B/19;1B/20;1B/21;1B/22;1B/23;1B/24;1B/25;1B/26;1B/27;1B/28;1B/29;1B/30;1B/31;1B/32;1B/33;1B/34;1B/35;1B/36;1B/NV_1;…	1
HG03624	M	SLCO1B1	*1/*1			1/1	1	1/1;1/1B;1/2;1/3;1/4;1/5;1/6;1/7;1/8;1/9;1/10;1/11;1/12;1/13;1/14;1/15;1/16;1/17;1/18;1/19;1/20;1/21;1/22;1/23;1/24;1/25;1/26;1/27;1/28;1/29;1/30;1/31;1/32;1/33;1/34;1/35;1/36;1/NV_1;1B/1B;1B/2;1B/3;1B/4;1B/5;1B/6;1B/7;1B/8;1B/9;1B/10;1B/11;1B/12;1B/13;1B/14;1B/15;1B/16;1B/17;1B/18;1B/19;1B/20;1B/21;1B/22;1B/23;1B/24;1B/25;1B/26;1B/27;1B/28;1B/29;1B/30;1B/31;1B/32;1B/33;1B/34;1B/35;1B/36;1B/NV_1;…	1
NA12762	M	SLCO1B1	*1/*1			1/1	1	1/1;1/1B;1/2;1/3;1/4;1/5;1/6;1/7;1/8;1/9;1/10;1/11;1/12;1/13;1/14;1/15;1/16;1/17;1/18;1/19;1/20;1/21;1/22;1/23;1/24;1/25;1/26;1/27;1/28;1/29;1/30;1/31;1/32;1/33;1/34;1/35;1/36;1/NV_1;1B/1B;1B/2;1B/3;1B/4;1B/5;1B/6;1B/7;1B/8;1B/9;1B/10;1B/11;1B/12;1B/13;1B/14;1B/15;1B/16;1B/17;1B/18;1B/19;1B/20;1B/21;1B/22;1B/23;1B/24;1B/25;1B/26;1B/27;1B/28;1B/29;1B/30;1B/31;1B/32;1B/33;1B/34;1B/35;1B/36;1B/NV_1;…	1
NA19315	F	SLCO1B1	*1/*1			1B/1B	1	1/1;1/1B;1/2;1/3;1/4;1/5;1/6;1/7;1/8;1/9;1/10;1/11;1/12;1/13;1/14;1/15;1/16;1/17;1/18;1/19;1/20;1/21;1/22;1/23;1/24;1/25;1/26;1/27;1/28;1/29;1/30;1/31;1/32;1/33;1/34;1/35;1/36;1/NV_1;1B/1B;1B/2;1B/3;1B/4;1B/5;1B/6;1B/7;1B/8;1B/9;1B/10;1B/11;1B/12;1B/13;1B/14;1B/15;1B/16;1B/17;1B/18;1B/19;1B/20;1B/21;1B/22;1B/23;1B/24;1B/25;1B/26;1B/27;1B/28;1B/29;1B/30;1B/31;1B/32;1B/33;1B/34;1B/35;1B/36;1B/NV_1;…	1
NA19452	M	SLCO1B1	*1/*1			1B/1B	1	1/1;1/1B;1/2;1/3;1/4;1/5;1/6;1/7;1/8;1/9;1/10;1/11;1/12;1/13;1/14;1/15;1/16;1/17;1/18;1/19;1/20;1/21;1/22;1/23;1/24;1/25;1/26;1/27;1/28;1/29;1/30;1/31;1/32;1/33;1/34;1/35;1/36;1/NV_1;1B/1B;1B/2;1B/3;1B/4;1B/5;1B/6;1B/7;1B/8;1B/9;1B/10;1B/11;1B/12;1B/13;1B/14;1B/15;1B/16;1B/17;1B/18;1B/19;1B/20;1B/21;1B/22;1B/23;1B/24;1B/25;1B/26;1B/27;1B/28;1B/29;1B/30;1B/31;1B/32;1B/33;1B/34;1B/35;1B/36;1B/NV_1;…	1
NA19466	M	SLCO1B1	*1/*1			1B/1B	1	1/1;1/1B;1/2;1/3;1/4;1/5;1/6;1/7;1/8;1/9;1/10;1/11;1/12;1/13;1/14;1/15;1/16;1/17;1/18;1/19;1/20;1/21;1/22;1/23;1/24;1/25;1/26;1/27;1/28;1/29;1/30;1/31;1/32;1/33;1/34;1/35;1/36;1/NV_1;1B/1B;1B/2;1B/3;1B/4;1B/5;1B/6;1B/7;1B/8;1B/9;1B/10;1B/11;1B/12;1B/13;1B/14;1B/15;1B/16;1B/17;1B/18;1B/19;1B/20;1B/21;1B/22;1B/23;1B/24;1B/25;1B/26;1B/27;1B/28;1B/29;1B/30;1B/31;1B/32;1B/33;1B/34;1B/35;1B/36;1B/NV_1;…	1
NA20901	1	SLCO1B1	*1/*1	1/14	1	1B/14	1		1
HG00118	F	TPMT	*1/*1			1/1	1	1/1	1
HG00130	F	TPMT	*1/*1			1/1	1	1/1	1
HG00185	M	TPMT	*1/*1			1/1	1	1/1	1
HG00246	M	TPMT	*1/*1			1/1	1	1/1	1
HG00276	1	TPMT	*1/*1	1/16	1	1/16	1	1/1	1
HG00332	F	TPMT	*1/*1			1/1	1	1/1	1
HG00437	F	TPMT	*1/*3C			1/3C	1	1/1	0
HG01083	F	TPMT	*1/*2			1/2	1	1/1	0
HG01086	F	TPMT	*1/*3A;*3B/*3C			1/3	1	1/1	0
HG01089	F	TPMT	*1/*1			1/1	1	1/1	1
HG01170	M	TPMT	*1/*1			1/1	1	1/1	1
HG01359	M	TPMT	*1/*1			1/1	1	1/1	1
HG01438	F	TPMT	*1/*1			1/1	1	1/1	1
HG01765	M	TPMT	*1/*1			1/1	1	1/1	1
HG01845	F	TPMT	*1/*1			1/1	1	1/1	1
HG02087	F	TPMT	*1/*1			1/1	1	1/1	1
HG02649	F	TPMT	*1/*1			1/1	1	1/1	1
HG03166	M	TPMT	*1/*1			1/1	1	1/1	1
HG03624	M	TPMT	*1/*1			1/1	1	1/1	1
NA12762	M	TPMT	*1/*3A;*3B/*3C			1/3	1	1/1	0
NA19315	F	TPMT	*1/*1			1/1	1	1/1	1
NA19452	M	TPMT	*1/*3C			1/3C	1	1/1	0
NA19466	M	TPMT	*1/*3C			1/3C	1	1/1	0
NA20901	M	TPMT	*1/*1			1/1	1		1
HG00276	2	CYP1A2	1A/1F			1A/1F	1
HG01190	2	CYP1A2	1A/1A			1A/1A	1
NA07019	2	CYP1A2	1A/1F			1A/1F	1
NA07357	2	CYP1A2	1F/1F			1F/1F	1
NA10831	2	CYP1A2	1A/1F			1A/1F	1
NA11832	2	CYP1A2	1F/1F			1F/1F	1
NA18484	2	CYP1A2	1/1			1A/1A	1
NA18518	2	CYP1A2	1A/1A			1A/1A	1
NA18519	2	CYP1A2	1/1			1A/1L	1
NA18544	2	CYP1A2	1F/1L			1L/1L	1
NA18552	2	CYP1A2	1A/1A			1A/1A	1
NA18564	2	CYP1A2	1A/1A			1A/1A	1
NA18855	2	CYP1A2	1/1			1A/1L	1
NA18868	2	CYP1A2	1A/1L;1C/1F			1A/1L	1
NA19109	2	CYP1A2	1A/1F			1A/1L	1
NA19122	2	CYP1A2	1A/1L;1C/1F			1A/1L	1
NA19147	2	CYP1A2	1A/1A			1A/1A	1
NA19174	2	CYP1A2	1A/1L;1C/1F			1A/1L	1
NA19207	2	CYP1A2	1A/1F			1A/1L	1
NA19226	2	CYP1A2	1A/1A			1A/1A	1
NA19239	2	CYP1A2	1A/1L;1C/1F			1A/1L	1
HG00276	2	CYP2B6	2/(4)	2/4	1	2/4	1
HG01190	2	CYP2B6	1(5)/1(27)	1/5	1	1/5	1
NA07019	2	CYP2B6	1(5)/1(22)	5/22	1	5/22	1
NA07357	2	CYP2B6	1/1			1/1	1
NA10831	2	CYP2B6	1/1			1/1	1
NA11832	2	CYP2B6	1/1			1/1	1
NA18484	2	CYP2B6	1/18			1/18	1
NA18518	2	CYP2B6	1/6			1/6	1
NA18519	2	CYP2B6	1/6	6/17	1	6/17	1
NA18544	2	CYP2B6	1/1			1/1	1
NA18552	2	CYP2B6	1/6			1/6	1
NA18564	2	CYP2B6	1/1			1/1	1
NA18855	2	CYP2B6	6/6			6/6	1
NA18868	2	CYP2B6	1/6			1/6	1
NA19109	2	CYP2B6	1/6			1/6	1
NA19122	2	CYP2B6	6/6			6/6	1
NA19147	2	CYP2B6	1/18			1/18	1
NA19174	2	CYP2B6	6/18	6/18;9/16	3	6/18	1
NA19207	2	CYP2B6	1/6			1/6	1
NA19226	2	CYP2B6	18/(20)	18/20	1	18*/20	1
NA19239	2	CYP2B6	1/6			1/6	1
HG00276	2	CYP2C19	1/1			1/1	1	1/1;1/17;1/36;1/37;17/17;17/36;17/37;36/36;36/37;37/37	1
HG01190	2	CYP2C19	1/2			1/2	1	1/1;1/2;1/17;1/35;1/36;1/37;2/2;2/17;2/35;2/36;2/37;17/17;17/35;17/36;17/37;35/35;35/36;35/37;36/36;36/37;37/37	1
NA07019	2	CYP2C19	1/17			1/17	1	1/1;1/17;1/36;1/37;17/17;17/36;17/37;36/36;36/37;37/37	1
NA07357	2	CYP2C19	2/17			2B/17	1	1/1;1/2;1/17;1/35;1/36;1/37;2/2;2/17;2/35;2/36;2/37;17/17;17/35;17/36;17/37;35/35;35/36;35/37;36/36;36/37;37/37	1
NA10831	2	CYP2C19	1/17			1/17	1	1/1;1/17;1/36;1/37;17/17;17/36;17/37;36/36;36/37;37/37	1
NA11832	2	CYP2C19	1/2	2/38	1	2/38	1	1/1;1/2;1/17;1/35;1/36;1/37;2/2;2/17;2/35;2/36;2/37;17/17;17/35;17/36;17/37;35/35;35/36;35/37;36/36;36/37;37/37	1
NA18484	2	CYP2C19	1/2			1/2B	1	1/1;1/2;1/17;1/35;1/36;1/37;2/2;2/17;2/35;2/36;2/37;17/17;17/35;17/36;17/37;35/35;35/36;35/37;36/36;36/37;37/37	1
NA18518	2	CYP2C19	2/17			2/17	1	1/1;1/2;1/17;1/35;1/36;1/37;2/2;2/17;2/35;2/36;2/37;17/17;17/35;17/36;17/37;35/35;35/36;35/37;36/36;36/37;37/37	1
NA18519	2	CYP2C19	1/17			1/17	1	1/1;1/17;1/36;1/37;17/17;17/36;17/37;36/36;36/37;37/37	1
NA18544	2	CYP2C19	1/2			1/2	1	1/1;1/2;1/17;1/35;1/36;1/37;2/2;2/17;2/35;2/36;2/37;17/17;17/35;17/36;17/37;35/35;35/36;35/37;36/36;36/37;37/37	1
NA18552	2	CYP2C19	1/4			1/4	1	4/4	0
NA18564	2	CYP2C19	2/3			2/3	1	1/1;1/2;1/3;1/17;1/35;1/36;1/37;2/2;2/3;2/17;2/35;2/36;2/37;3/3;3/17;3/35;3/36;3/37;17/17;17/35;17/36;17/37;35/35;35/36;35/37;36/36;36/37;37/37	1
NA18855	2	CYP2C19	1/2			1/2	1	1/1;1/2;1/17;1/35;1/36;1/37;2/2;2/17;2/35;2/36;2/37;17/17;17/35;17/36;17/37;35/35;35/36;35/37;36/36;36/37;37/37	1
NA18868	2	CYP2C19	1/2			1/2	1	1/1;1/2;1/17;1/35;1/36;1/37;2/2;2/17;2/35;2/36;2/37;17/17;17/35;17/36;17/37;35/35;35/36;35/37;36/36;36/37;37/37	1
NA19109	2	CYP2C19	17/17			17/17	1	1/1;1/17;1/36;1/37;17/17;17/36;17/37;36/36;36/37;37/37	1
NA19122	2	CYP2C19	2/15	2/(15,35)	3	2/35.002	1	1/1;1/2;1/15;1/17;1/28;1/35;1/36;1/37;2/2;2/15;2/17;2/28;2/35;2/36;2/37;15/15;15/17;15/28;15/35;15/36;15/37;17/17;17/28;17/35;17/36;17/37;28/28;28/35;28/36;28/37;35/35;35/36;35/37;36/36;36/37;37/37	1
NA19147	2	CYP2C19	1/17			1/17	1	1/1;1/17;1/36;1/37;17/17;17/36;17/37;36/36;36/37;37/37	1
NA19174	2	CYP2C19	1/2			1/2	1	1/1;1/2;1/17;1/35;1/36;1/37;2/2;2/17;2/35;2/36;2/37;17/17;17/35;17/36;17/37;35/35;35/36;35/37;36/36;36/37;37/37	1
NA19207	2	CYP2C19	2/17			2/17	1	1/1;1/2;1/17;1/35;1/36;1/37;2/2;2/17;2/35;2/36;2/37;17/17;17/35;17/36;17/37;35/35;35/36;35/37;36/36;36/37;37/37	1
NA19226	2	CYP2C19	1/2			1/2	1	1/1;1/2;1/17;1/35;1/36;1/37;2/2;2/17;2/35;2/36;2/37;17/17;17/35;17/36;17/37;35/35;35/36;35/37;36/36;36/37;37/37	1
NA19239	2	CYP2C19	13/17			13/17	1	1/1;1/13;1/17;1/36;1/37;13/13;13/17;13/36;13/37;17/17;17/36;17/37;36/36;36/37;37/37	1
HG00276	2	CYP2C8	1/3			1/3	1	1/1	0
HG01190	2	CYP2C8	1/3			1/3	1	1/1	0
NA07019	2	CYP2C8	1/1			1/1	1	1/1	1
NA07357	2	CYP2C8	1/4			1/4	1	1/1	0
NA10831	2	CYP2C8	1/1			1/1	1	1/1	1
NA11832	2	CYP2C8	1/1			1/1	1	1/1	1
NA18484	2	CYP2C8	1/4			1/4	1	1/1	0
NA18518	2	CYP2C8	1/2			1/2	1	1/1	0
NA18519	2	CYP2C8	1/2			1/2	1	1/1	0
NA18544	2	CYP2C8	1/1			1/1	1	1/1	1
NA18552	2	CYP2C8	1/1			1/1	1	1/1	1
NA18564	2	CYP2C8	1/1			1/1	1	1/1	1
NA18855	2	CYP2C8	1/1			1/1	1	1/1	1
NA18868	2	CYP2C8	1/1			1/1	1	1/1	1
NA19109	2	CYP2C8	2/2			2/2	1	1/1	0
NA19122	2	CYP2C8	1/1			1/1	1	1/1	1
NA19147	2	CYP2C8	1/1			1/1	1	1/1	1
NA19174	2	CYP2C8	1/1			1/1	1	1/1	1
NA19207	2	CYP2C8	1/2			1/2	1	1/1	0
NA19226	2	CYP2C8	1/1			1/1	1	1/1	1
NA19239	2	CYP2C8	1/2			1/2	1	1/1	0
HG00276	2	CYP2C9	1/2			1/2	1	1/1;1/2;2/2	1
HG01190	2	CYP2C9	1/61			1/61	1	1/1;1/2;1/61;2/2;2/61;61/61	1
NA07019	2	CYP2C9	1/1			1/1	1	1/1	1
NA07357	2	CYP2C9	1/1			1/1	1	1/1	1
NA10831	2	CYP2C9	1/2			1/2	1	1/1;1/2;2/2	1
NA11832	2	CYP2C9	1/3			1/3	1	1/1;1/3;3/3	1
NA18484	2	CYP2C9	1/9			1/9	1	1/1;1/9;9/9	1
NA18518	2	CYP2C9	1/1			1/1	1	1/1	1
NA18519	2	CYP2C9	1/5			1/5	1	1/1;1/5;5/5	1
NA18544	2	CYP2C9	1/1			1/1	1	1/1	1
NA18552	2	CYP2C9	1/1			1/1	1	1/1	1
NA18564	2	CYP2C9	1/1			1/1	1	1/1	1
NA18855	2	CYP2C9	1/9			1/9	1	1/1;1/9;9/9	1
NA18868	2	CYP2C9	1/1			1/1	1	1/1	1
NA19109	2	CYP2C9	1/1			1/1	1	1/1	1
NA19122	2	CYP2C9	1/11			1/11	1	1/1;1/11;11/11	1
NA19147	2	CYP2C9	1/1			1/1	1	1/1	1
NA19174	2	CYP2C9	1/1			1/1	1	1/1	1
NA19207	2	CYP2C9	1/1			1/1	1	1/1	1
NA19226	2	CYP2C9	1/8			1/1	0	1/1	0
NA19239	2	CYP2C9	1/1			1/1	1	1/1	1
HG00276	2	CYP2D6	4/5			4/5	1	1/1;1/4;1/5;1/10;1/11;1/17;1/35;1/38;1/39;1/41;1/45;1/46;1/74;1/59;1/6;1/29;1/70;1/10D;1/1E;1/4A;1/4B;1/4C;1/4D;1/4E;1/4F;1/4G;1/4H;1/4J;1/4K;1/4L;1/4N;4/4;4/5;4/10;4/11;4/17;4/35;4/38;4/39;4/41;4/45;4/46;4/74;4/59;4/6;4/29;4/70;4/10D;4/1E;4/4A;4/4B;4/4C;4/4D;4/4E;4/4F;4/4G;4/4H;4/4J;4/4K;4/4L;4/4N;5/5;5/10;5/11;5/17;5/35;5/38;5/39;5/41;5/45;5/46;5/74;5/59;5/4;5/6;5/29;5/70;5/10D;5/1E;5/4A;5/4B;5…	1
HG01190	2	CYP2D6	68+4/5;4/68			4/68	1	1/1;1/4;1/5;1/10;1/11;1/17;1/35;1/38;1/39;1/41;1/45;1/46;1/49;1/53;1/74;1/82;1/88;1/59;1/6;1/29;1/70;1/10D;1/1E;1/4A;1/4B;1/4C;1/4D;1/4E;1/4F;1/4G;1/4H;1/4J;1/4K;1/4L;1/4N;4/4;4/5;4/10;4/11;4/17;4/35;4/38;4/39;4/41;4/45;4/46;4/49;4/53;4/74;4/82;4/88;4/59;4/6;4/29;4/70;4/10D;4/1E;4/4A;4/4B;4/4C;4/4D;4/4E;4/4F;4/4G;4/4H;4/4J;4/4K;4/4L;4/4N;5/5;5/10;5/11;5/17;5/35;5/38;5/39;5/41;5/45;5/46;5/49;5/53;…	0
NA07019	2	CYP2D6	1/4			1/4	1	1/1;1/4;1/5;1/10;1/11;1/17;1/35;1/38;1/39;1/41;1/45;1/46;1/74;1/59;1/6;1/29;1/70;1/10D;1/1E;1/4A;1/4B;1/4C;1/4D;1/4E;1/4F;1/4G;1/4H;1/4J;1/4K;1/4L;1/4N;4/4;4/5;4/10;4/11;4/17;4/35;4/38;4/39;4/41;4/45;4/46;4/74;4/59;4/6;4/29;4/70;4/10D;4/1E;4/4A;4/4B;4/4C;4/4D;4/4E;4/4F;4/4G;4/4H;4/4J;4/4K;4/4L;4/4N;5/5;5/10;5/11;5/17;5/35;5/38;5/39;5/41;5/45;5/46;5/74;5/59;5/4;5/6;5/29;5/70;5/10D;5/1E;5/4A;5/4B;5…	1
NA07357	2	CYP2D6	1/6			1/6B	1	1/1;1/5;1/6;1/11;1/17;1/35;1/38;1/41;1/45;1/46;1/59;1/10;1/4;1/29;1/70;1/1E;1/6D;5/5;5/6;5/11;5/17;5/35;5/38;5/41;5/45;5/46;5/59;5/10;5/4;5/29;5/70;5/1E;5/6D;6/6;6/11;6/17;6/35;6/38;6/41;6/45;6/46;6/59;6/10;6/4;6/29;6/70;6/1E;6/6D;11/11;11/17;11/35;11/38;11/41;11/45;11/46;11/59;11/10;11/4;11/6;11/29;11/70;11/1E;11/6D;17/17;17/35;17/38;17/41;17/45;17/46;17/59;17/10;17/4;17/6;17/29;17/70;17/1E;17/6…	1
NA10831	2	CYP2D6	4/5			4/5	1	1/1;1/4;1/5;1/10;1/11;1/17;1/35;1/38;1/39;1/41;1/45;1/46;1/74;1/59;1/6;1/29;1/70;1/10D;1/1E;1/4A;1/4B;1/4C;1/4D;1/4E;1/4F;1/4G;1/4H;1/4J;1/4K;1/4L;1/4N;4/4;4/5;4/10;4/11;4/17;4/35;4/38;4/39;4/41;4/45;4/46;4/74;4/59;4/6;4/29;4/70;4/10D;4/1E;4/4A;4/4B;4/4C;4/4D;4/4E;4/4F;4/4G;4/4H;4/4J;4/4K;4/4L;4/4N;5/5;5/10;5/11;5/17;5/35;5/38;5/39;5/41;5/45;5/46;5/74;5/59;5/4;5/6;5/29;5/70;5/10D;5/1E;5/4A;5/4B;5…	1
NA11832	2	CYP2D6	1/68+4			1/4	0	1/1;1/4;1/5;1/10;1/11;1/17;1/35;1/38;1/39;1/41;1/45;1/46;1/74;1/59;1/6;1/29;1/70;1/10D;1/1E;1/4A;1/4B;1/4C;1/4D;1/4E;1/4F;1/4G;1/4H;1/4J;1/4K;1/4L;1/4N;4/4;4/5;4/10;4/11;4/17;4/35;4/38;4/39;4/41;4/45;4/46;4/74;4/59;4/6;4/29;4/70;4/10D;4/1E;4/4A;4/4B;4/4C;4/4D;4/4E;4/4F;4/4G;4/4H;4/4J;4/4K;4/4L;4/4N;5/5;5/10;5/11;5/17;5/35;5/38;5/39;5/41;5/45;5/46;5/74;5/59;5/4;5/6;5/29;5/70;5/10D;5/1E;5/4A;5/4B;5…	0
NA18484	2	CYP2D6	1/17			1/17	1	1/1;1/2;1/5;1/11;1/17;1/31;1/34;1/35;1/38;1/39;1/41;1/45;1/46;1/59;1/10;1/4;1/6;1/29;1/70;1/1E;2/2;2/5;2/11;2/17;2/31;2/34;2/35;2/38;2/39;2/41;2/45;2/46;2/59;2/10;2/4;2/6;2/29;2/70;2/1E;5/5;5/11;5/17;5/31;5/34;5/35;5/38;5/39;5/41;5/45;5/46;5/59;5/10;5/4;5/6;5/29;5/70;5/1E;11/11;11/17;11/31;11/34;11/35;11/38;11/39;11/41;11/45;11/46;11/59;11/10;11/4;11/6;11/29;11/70;11/1E;17/17;17/31;17/34;17/35;17…	1
NA18518	2	CYP2D6	17/29			17/29	1	1/1;1/2;1/5;1/11;1/17;1/29;1/31;1/34;1/35;1/38;1/39;1/41;1/45;1/46;1/59;1/10;1/4;1/6;1/70;1/107;1/1E;2/2;2/5;2/11;2/17;2/29;2/31;2/34;2/35;2/38;2/39;2/41;2/45;2/46;2/59;2/10;2/4;2/6;2/70;2/107;2/1E;5/5;5/11;5/17;5/29;5/31;5/34;5/35;5/38;5/39;5/41;5/45;5/46;5/59;5/10;5/4;5/6;5/70;5/107;5/1E;11/11;11/17;11/29;11/31;11/34;11/35;11/38;11/39;11/41;11/45;11/46;11/59;11/10;11/4;11/6;11/70;11/107;11/1E;1…	1
NA18519	2	CYP2D6	29/106			29/106	1	1/1;1/2;1/5;1/11;1/17;1/29;1/31;1/34;1/35;1/38;1/39;1/41;1/45;1/46;1/59;1/10;1/4;1/6;1/70;1/106;1/107;1/1E;2/2;2/5;2/11;2/17;2/29;2/31;2/34;2/35;2/38;2/39;2/41;2/45;2/46;2/59;2/10;2/4;2/6;2/70;2/106;2/107;2/1E;5/5;5/11;5/17;5/29;5/31;5/34;5/35;5/38;5/39;5/41;5/45;5/46;5/59;5/10;5/4;5/6;5/70;5/106;5/107;5/1E;11/11;11/17;11/29;11/31;11/34;11/35;11/38;11/39;11/41;11/45;11/46;11/59;11/10;11/4;11/6;11…	1
NA18544	2	CYP2D6	10/41			10/41	1	1/1;1/2;1/5;1/10;1/11;1/17;1/31;1/34;1/35;1/38;1/39;1/41;1/45;1/46;1/65;1/69;1/59;1/4;1/6;1/29;1/70;1/10D;1/1E;2/2;2/5;2/10;2/11;2/17;2/31;2/34;2/35;2/38;2/39;2/41;2/45;2/46;2/65;2/69;2/59;2/4;2/6;2/29;2/70;2/10D;2/1E;5/5;5/10;5/11;5/17;5/31;5/34;5/35;5/38;5/39;5/41;5/45;5/46;5/65;5/69;5/59;5/4;5/6;5/29;5/70;5/10D;5/1E;10/10;10/11;10/17;10/31;10/34;10/35;10/38;10/39;10/41;10/45;10/46;10/65;10/69;…	1
NA18552	2	CYP2D6	1/14			1/14	1	1/1;1/2;1/5;1/11;1/14;1/17;1/31;1/34;1/35;1/38;1/39;1/41;1/45;1/46;1/59;1/10;1/4;1/6;1/29;1/70;1/1E;2/2;2/5;2/11;2/14;2/17;2/31;2/34;2/35;2/38;2/39;2/41;2/45;2/46;2/59;2/10;2/4;2/6;2/29;2/70;2/1E;5/5;5/11;5/14;5/17;5/31;5/34;5/35;5/38;5/39;5/41;5/45;5/46;5/59;5/10;5/4;5/6;5/29;5/70;5/1E;11/11;11/14;11/17;11/31;11/34;11/35;11/38;11/39;11/41;11/45;11/46;11/59;11/10;11/4;11/6;11/29;11/70;11/1E;14/14…	1
NA18564	2	CYP2D6	2/36+10			2/36.ALDY+36.ALDY	0	1/1;1/2;1/5;1/10;1/11;1/17;1/31;1/34;1/35;1/38;1/39;1/41;1/45;1/46;1/65;1/59;1/4;1/6;1/29;1/70;1/10D;1/1E;2/2;2/5;2/10;2/11;2/17;2/31;2/34;2/35;2/38;2/39;2/41;2/45;2/46;2/65;2/59;2/4;2/6;2/29;2/70;2/10D;2/1E;5/5;5/10;5/11;5/17;5/31;5/34;5/35;5/38;5/39;5/41;5/45;5/46;5/65;5/59;5/4;5/6;5/29;5/70;5/10D;5/1E;10/10;10/11;10/17;10/31;10/34;10/35;10/38;10/39;10/41;10/45;10/46;10/65;10/59;10/4;10/6;10/29…	0
NA18855	2	CYP2D6	1/5			1/5	1	1/1;1/5;1/11;1/17;1/35;1/38;1/41;1/45;1/46;1/59;1/10;1/4;1/6;1/29;1/70;1/1E;5/5;5/11;5/17;5/35;5/38;5/41;5/45;5/46;5/59;5/10;5/4;5/6;5/29;5/70;5/1E;11/11;11/17;11/35;11/38;11/41;11/45;11/46;11/59;11/10;11/4;11/6;11/29;11/70;11/1E;17/17;17/35;17/38;17/41;17/45;17/46;17/59;17/10;17/4;17/6;17/29;17/70;17/1E;35/35;35/38;35/41;35/45;35/46;35/59;35/10;35/4;35/6;35/29;35/70;35/1E;38/38;38/41;38/45;38/46…	1
NA18868	2	CYP2D6	2/5			2/5	1	1/1;1/2;1/5;1/11;1/17;1/31;1/34;1/35;1/38;1/39;1/41;1/45;1/46;1/59;1/10;1/4;1/6;1/29;1/70;1/1E;2/2;2/5;2/11;2/17;2/31;2/34;2/35;2/38;2/39;2/41;2/45;2/46;2/59;2/10;2/4;2/6;2/29;2/70;2/1E;5/5;5/11;5/17;5/31;5/34;5/35;5/38;5/39;5/41;5/45;5/46;5/59;5/10;5/4;5/6;5/29;5/70;5/1E;11/11;11/17;11/31;11/34;11/35;11/38;11/39;11/41;11/45;11/46;11/59;11/10;11/4;11/6;11/29;11/70;11/1E;17/17;17/31;17/34;17/35;17…	1
NA19109	2	CYP2D6	2+2/29			2+2/29	1	1/1;1/2;1/5;1/11;1/17;1/29;1/31;1/34;1/35;1/38;1/39;1/41;1/45;1/46;1/59;1/10;1/4;1/6;1/70;1/107;1/1E;2/2;2/5;2/11;2/17;2/29;2/31;2/34;2/35;2/38;2/39;2/41;2/45;2/46;2/59;2/10;2/4;2/6;2/70;2/107;2/1E;5/5;5/11;5/17;5/29;5/31;5/34;5/35;5/38;5/39;5/41;5/45;5/46;5/59;5/10;5/4;5/6;5/70;5/107;5/1E;11/11;11/17;11/29;11/31;11/34;11/35;11/38;11/39;11/41;11/45;11/46;11/59;11/10;11/4;11/6;11/70;11/107;11/1E;1…	0
NA19122	2	CYP2D6	2/17			2/17	1	1/1;1/2;1/5;1/11;1/17;1/31;1/34;1/35;1/38;1/39;1/41;1/45;1/46;1/59;1/10;1/4;1/6;1/29;1/70;1/1E;2/2;2/5;2/11;2/17;2/31;2/34;2/35;2/38;2/39;2/41;2/45;2/46;2/59;2/10;2/4;2/6;2/29;2/70;2/1E;5/5;5/11;5/17;5/31;5/34;5/35;5/38;5/39;5/41;5/45;5/46;5/59;5/10;5/4;5/6;5/29;5/70;5/1E;11/11;11/17;11/31;11/34;11/35;11/38;11/39;11/41;11/45;11/46;11/59;11/10;11/4;11/6;11/29;11/70;11/1E;17/17;17/31;17/34;17/35;17…	1
NA19147	2	CYP2D6	17/29			17/29	1	1/1;1/2;1/5;1/11;1/17;1/29;1/31;1/34;1/35;1/38;1/39;1/41;1/45;1/46;1/59;1/10;1/4;1/6;1/70;1/107;1/1E;2/2;2/5;2/11;2/17;2/29;2/31;2/34;2/35;2/38;2/39;2/41;2/45;2/46;2/59;2/10;2/4;2/6;2/70;2/107;2/1E;5/5;5/11;5/17;5/29;5/31;5/34;5/35;5/38;5/39;5/41;5/45;5/46;5/59;5/10;5/4;5/6;5/70;5/107;5/1E;11/11;11/17;11/29;11/31;11/34;11/35;11/38;11/39;11/41;11/45;11/46;11/59;11/10;11/4;11/6;11/70;11/107;11/1E;1…	1
NA19174	2	CYP2D6	4/40			4+4/40	0	1/1;1/2;1/4;1/5;1/10;1/11;1/17;1/31;1/34;1/35;1/38;1/39;1/41;1/45;1/46;1/64;1/65;1/74;1/59;1/6;1/29;1/70;1/10D;1/1E;1/4A;1/4B;1/4C;1/4D;1/4E;1/4F;1/4G;1/4H;1/4J;1/4K;1/4L;1/4N;2/2;2/4;2/5;2/10;2/11;2/17;2/31;2/34;2/35;2/38;2/39;2/41;2/45;2/46;2/64;2/65;2/74;2/59;2/6;2/29;2/70;2/10D;2/1E;2/4A;2/4B;2/4C;2/4D;2/4E;2/4F;2/4G;2/4H;2/4J;2/4K;2/4L;2/4N;4/4;4/5;4/10;4/11;4/17;4/31;4/34;4/35;4/38;4/39;4/4…	0
NA19207	2	CYP2D6	2+2/10			2+2/10	1	1/1;1/2;1/5;1/10;1/11;1/17;1/31;1/34;1/35;1/38;1/39;1/41;1/45;1/46;1/65;1/59;1/4;1/6;1/29;1/70;1/10D;1/1E;2/2;2/5;2/10;2/11;2/17;2/31;2/34;2/35;2/38;2/39;2/41;2/45;2/46;2/65;2/59;2/4;2/6;2/29;2/70;2/10D;2/1E;5/5;5/10;5/11;5/17;5/31;5/34;5/35;5/38;5/39;5/41;5/45;5/46;5/65;5/59;5/4;5/6;5/29;5/70;5/10D;5/1E;10/10;10/11;10/17;10/31;10/34;10/35;10/38;10/39;10/41;10/45;10/46;10/65;10/59;10/4;10/6;10/29…	0
NA19226	2	CYP2D6	2/2+2			2/2+2	1	1/1;1/2;1/5;1/11;1/17;1/31;1/34;1/35;1/38;1/39;1/41;1/45;1/46;1/59;1/10;1/4;1/6;1/29;1/70;1/1E;2/2;2/5;2/11;2/17;2/31;2/34;2/35;2/38;2/39;2/41;2/45;2/46;2/59;2/10;2/4;2/6;2/29;2/70;2/1E;5/5;5/11;5/17;5/31;5/34;5/35;5/38;5/39;5/41;5/45;5/46;5/59;5/10;5/4;5/6;5/29;5/70;5/1E;11/11;11/17;11/31;11/34;11/35;11/38;11/39;11/41;11/45;11/46;11/59;11/10;11/4;11/6;11/29;11/70;11/1E;17/17;17/31;17/34;17/35;17…	0
NA19239	2	CYP2D6	15/17			15/17	1	1/1;1/2;1/5;1/11;1/15;1/17;1/31;1/34;1/35;1/38;1/39;1/41;1/45;1/46;1/59;1/10;1/4;1/6;1/29;1/70;1/1E;2/2;2/5;2/11;2/15;2/17;2/31;2/34;2/35;2/38;2/39;2/41;2/45;2/46;2/59;2/10;2/4;2/6;2/29;2/70;2/1E;5/5;5/11;5/15;5/17;5/31;5/34;5/35;5/38;5/39;5/41;5/45;5/46;5/59;5/10;5/4;5/6;5/29;5/70;5/1E;11/11;11/15;11/17;11/31;11/34;11/35;11/38;11/39;11/41;11/45;11/46;11/59;11/10;11/4;11/6;11/29;11/70;11/1E;15/15…	1
HG00276	2	CYP3A4	1/2			1/2	1
HG01190	2	CYP3A4	1/1B			1/1	1
NA07019	2	CYP3A4	1/1			1/1	1
NA07357	2	CYP3A4	1/1			1/1	1
NA10831	2	CYP3A4	1/1			1/1	1
NA11832	2	CYP3A4	1/1			1/1	1
NA18484	2	CYP3A4	1B/1B			1/1	1
NA18518	2	CYP3A4	1B/1B			1/1	1
NA18519	2	CYP3A4	1B/1B			1/1	1
NA18544	2	CYP3A4	1/1			1/1	1
NA18552	2	CYP3A4	1/1			1/1	1
NA18564	2	CYP3A4	1/1			1/1	1
NA18855	2	CYP3A4	1/1B			1/1	1
NA18868	2	CYP3A4	1B/1B			1/1	1
NA19109	2	CYP3A4	1B/15			1/15	1
NA19122	2	CYP3A4	1B/1B			1/1	1
NA19147	2	CYP3A4	1/1B			1/1	1
NA19174	2	CYP3A4	1B/1B			1/1	1
NA19207	2	CYP3A4	1B/1B			1/1	1
NA19226	2	CYP3A4	1B/15			1/15	1
NA19239	2	CYP3A4	1/1B			1/1	1
HG00276	2	CYP3A5	3/3			3/3	1
HG01190	2	CYP3A5	1/1			1/1	1
NA07019	2	CYP3A5	3/3			3/3	1
NA07357	2	CYP3A5	3/3			3/3	1
NA10831	2	CYP3A5	3/3			3/3	1
NA11832	2	CYP3A5	3/3			3/3	1
NA18484	2	CYP3A5	1/7			1/7	1
NA18518	2	CYP3A5	1/6			1/6	1
NA18519	2	CYP3A5	1/6			1/6	1
NA18544	2	CYP3A5	1/3			1/3	1
NA18552	2	CYP3A5	3/3			3/3	1
NA18564	2	CYP3A5	1/1			1/1	1
NA18855	2	CYP3A5	3/6			3/6	1
NA18868	2	CYP3A5	1/3			1/3	1
NA19109	2	CYP3A5	1/3			1/3	1
NA19122	2	CYP3A5	1/1			1/1	1
NA19147	2	CYP3A5	1/3			1/3	1
NA19174	2	CYP3A5	1/6			1/6	1
NA19207	2	CYP3A5	3/7			3/7	1
NA19226	2	CYP3A5	1/6			1/6	1
NA19239	2	CYP3A5	1/1			1/1	1
HG00276	2	CYP4F2	1/1			1/1	1	1/1	1
HG01190	2	CYP4F2	1/3			1/3	1	1/1	0
NA07019	2	CYP4F2	1/3			1/3	1	1/1	0
NA07357	2	CYP4F2	1/1			1/1	1	1/1	1
NA10831	2	CYP4F2	1/1			1/1	1	1/1	1
NA11832	2	CYP4F2	1/1			1/1	1	1/1	1
NA18484	2	CYP4F2	1/2			1/2	1	1/1	0
NA18518	2	CYP4F2	1/2			1/2	1	1/1	0
NA18519	2	CYP4F2	2/3	1/4;2/3	3	1/4;2/3	1	1/1	0
NA18544	2	CYP4F2	1/1			1/1	1	1/1	1
NA18552	2	CYP4F2	1/3			1/3	1	1/1	0
NA18564	2	CYP4F2	3/4			3/4	1	1/1	0
NA18855	2	CYP4F2	1/1			1/1	1	1/1	1
NA18868	2	CYP4F2	1/1			1/1	1	1/1	1
NA19109	2	CYP4F2	1/1			1/1	1	1/1	1
NA19122	2	CYP4F2	1/2			1/2	1	1/1	0
NA19147	2	CYP4F2	1/1			1/1	1	1/1	1
NA19174	2	CYP4F2	1/1			1/1	1	1/1	1
NA19207	2	CYP4F2	1/1			1/1	1	1/1	1
NA19226	2	CYP4F2	1/2			1/2	1	1/1	0
NA19239	2	CYP4F2	1/1			1/1	1	1/1	1
HG00276	2	DPYD	1/1			1/1	1
HG01190	2	DPYD	1/9			1/9	1
NA07019	2	DPYD	1/1			1/1	1
NA07357	2	DPYD	5/6*;5/9*;9/rs17376848*			5*/6;5*/rs;6*/rs	1
NA10831	2	DPYD	9/rs17376848*;5/rs17376848*;5/9*			5*/6;5*/rs;6*/rs	1
NA11832	2	DPYD	1/5	*	3	5/rs2297595	1
NA18484	2	DPYD	1/9			1/9	1
NA18518	2	DPYD	5/9			5/9	1
NA18519	2	DPYD	9/9			9/9	1
NA18544	2	DPYD	1/5	*	3	5/rs17376848	1
NA18552	2	DPYD	1/5			1/5	1
NA18564	2	DPYD	5/9			5/9	1
NA18855	2	DPYD	9/9	*	3	9/rs61622928*	1
NA18868	2	DPYD	1/9			1/9	1
NA19109	2	DPYD	1/9	*	3	9/rs61622928	1
NA19122	2	DPYD	1/1			1/1	1
NA19147	2	DPYD	1/9	*	3	1/9	1
NA19174	2	DPYD	1/1			1/1	1
NA19207	2	DPYD	1/9	*	3	9/rs115232898	1
NA19226	2	DPYD	1/9	*	3	9/rs61622928	1
NA19239	2	DPYD	1/9	*	3	1/9	1
HG00276	2	SLCO1B1	1/15			1/15	1	1/1;1/1B;1/2;1/3;1/4;1/5;1/6;1/7;1/8;1/9;1/10;1/11;1/12;1/13;1/14;1/15;1/16;1/17;1/18;1/19;1/20;1/21;1/22;1/23;1/24;1/25;1/26;1/27;1/28;1/29;1/30;1/31;1/32;1/33;1/34;1/35;1/36;1/NV_1;1B/1B;1B/2;1B/3;1B/4;1B/5;1B/6;1B/7;1B/8;1B/9;1B/10;1B/11;1B/12;1B/13;1B/14;1B/15;1B/16;1B/17;1B/18;1B/19;1B/20;1B/21;1B/22;1B/23;1B/24;1B/25;1B/26;1B/27;1B/28;1B/29;1B/30;1B/31;1B/32;1B/33;1B/34;1B/35;1B/36;1B/NV_1;…	1
HG01190	2	SLCO1B1	1/1			1/1	1	1/1;1/1B;1/2;1/3;1/4;1/5;1/6;1/7;1/8;1/9;1/10;1/11;1/12;1/13;1/14;1/15;1/16;1/17;1/18;1/19;1/20;1/21;1/22;1/23;1/24;1/25;1/26;1/27;1/28;1/29;1/30;1/31;1/32;1/33;1/34;1/35;1/36;1/NV_1;1B/1B;1B/2;1B/3;1B/4;1B/5;1B/6;1B/7;1B/8;1B/9;1B/10;1B/11;1B/12;1B/13;1B/14;1B/15;1B/16;1B/17;1B/18;1B/19;1B/20;1B/21;1B/22;1B/23;1B/24;1B/25;1B/26;1B/27;1B/28;1B/29;1B/30;1B/31;1B/32;1B/33;1B/34;1B/35;1B/36;1B/NV_1;…	1
NA07019	2	SLCO1B1	1/14			1/14	1	1/1;1/1B;1/2;1/3;1/4;1/5;1/6;1/7;1/8;1/9;1/10;1/11;1/12;1/13;1/14;1/15;1/16;1/17;1/18;1/19;1/20;1/21;1/22;1/23;1/24;1/25;1/26;1/27;1/28;1/29;1/30;1/31;1/32;1/33;1/34;1/35;1/36;1/NV_1;1B/1B;1B/2;1B/3;1B/4;1B/5;1B/6;1B/7;1B/8;1B/9;1B/10;1B/11;1B/12;1B/13;1B/14;1B/15;1B/16;1B/17;1B/18;1B/19;1B/20;1B/21;1B/22;1B/23;1B/24;1B/25;1B/26;1B/27;1B/28;1B/29;1B/30;1B/31;1B/32;1B/33;1B/34;1B/35;1B/36;1B/NV_1;…	1
NA07357	2	SLCO1B1	1/15			1/15	1	1/1;1/1B;1/2;1/3;1/4;1/5;1/6;1/7;1/8;1/9;1/10;1/11;1/12;1/13;1/14;1/15;1/16;1/17;1/18;1/19;1/20;1/21;1/22;1/23;1/24;1/25;1/26;1/27;1/28;1/29;1/30;1/31;1/32;1/33;1/34;1/35;1/36;1/NV_1;1B/1B;1B/2;1B/3;1B/4;1B/5;1B/6;1B/7;1B/8;1B/9;1B/10;1B/11;1B/12;1B/13;1B/14;1B/15;1B/16;1B/17;1B/18;1B/19;1B/20;1B/21;1B/22;1B/23;1B/24;1B/25;1B/26;1B/27;1B/28;1B/29;1B/30;1B/31;1B/32;1B/33;1B/34;1B/35;1B/36;1B/NV_1;…	1
NA10831	2	SLCO1B1	1/14			1/14	1	1/1;1/1B;1/2;1/3;1/4;1/5;1/6;1/7;1/8;1/9;1/10;1/11;1/12;1/13;1/14;1/15;1/16;1/17;1/18;1/19;1/20;1/21;1/22;1/23;1/24;1/25;1/26;1/27;1/28;1/29;1/30;1/31;1/32;1/33;1/34;1/35;1/36;1/NV_1;1B/1B;1B/2;1B/3;1B/4;1B/5;1B/6;1B/7;1B/8;1B/9;1B/10;1B/11;1B/12;1B/13;1B/14;1B/15;1B/16;1B/17;1B/18;1B/19;1B/20;1B/21;1B/22;1B/23;1B/24;1B/25;1B/26;1B/27;1B/28;1B/29;1B/30;1B/31;1B/32;1B/33;1B/34;1B/35;1B/36;1B/NV_1;…	1
NA11832	2	SLCO1B1	1/1	14/20	1	14/20	1	1/1;1/1B;1/2;1/3;1/4;1/5;1/6;1/7;1/8;1/9;1/10;1/11;1/12;1/13;1/14;1/15;1/16;1/17;1/18;1/19;1/20;1/21;1/22;1/23;1/24;1/25;1/26;1/27;1/28;1/29;1/30;1/31;1/32;1/33;1/34;1/35;1/36;1/NV_1;1B/1B;1B/2;1B/3;1B/4;1B/5;1B/6;1B/7;1B/8;1B/9;1B/10;1B/11;1B/12;1B/13;1B/14;1B/15;1B/16;1B/17;1B/18;1B/19;1B/20;1B/21;1B/22;1B/23;1B/24;1B/25;1B/26;1B/27;1B/28;1B/29;1B/30;1B/31;1B/32;1B/33;1B/34;1B/35;1B/36;1B/NV_1;…	1
NA18484	2	SLCO1B1	1A/1B	1B/41	1	1B/41	1	1/1;1/1B;1/2;1/3;1/4;1/5;1/6;1/7;1/8;1/9;1/10;1/11;1/12;1/13;1/14;1/15;1/16;1/17;1/18;1/19;1/20;1/21;1/22;1/23;1/24;1/25;1/26;1/27;1/28;1/29;1/30;1/31;1/32;1/33;1/34;1/35;1/36;1/NV_1;1B/1B;1B/2;1B/3;1B/4;1B/5;1B/6;1B/7;1B/8;1B/9;1B/10;1B/11;1B/12;1B/13;1B/14;1B/15;1B/16;1B/17;1B/18;1B/19;1B/20;1B/21;1B/22;1B/23;1B/24;1B/25;1B/26;1B/27;1B/28;1B/29;1B/30;1B/31;1B/32;1B/33;1B/34;1B/35;1B/36;1B/NV_1;…	1
NA18518	2	SLCO1B1	1A/1B			1/1B	1	1/1;1/1B;1/2;1/3;1/4;1/5;1/6;1/7;1/8;1/9;1/10;1/11;1/12;1/13;1/14;1/15;1/16;1/17;1/18;1/19;1/20;1/21;1/22;1/23;1/24;1/25;1/26;1/27;1/28;1/29;1/30;1/31;1/32;1/33;1/34;1/35;1/36;1/NV_1;1B/1B;1B/2;1B/3;1B/4;1B/5;1B/6;1B/7;1B/8;1B/9;1B/10;1B/11;1B/12;1B/13;1B/14;1B/15;1B/16;1B/17;1B/18;1B/19;1B/20;1B/21;1B/22;1B/23;1B/24;1B/25;1B/26;1B/27;1B/28;1B/29;1B/30;1B/31;1B/32;1B/33;1B/34;1B/35;1B/36;1B/NV_1;…	1
NA18519	2	SLCO1B1	1B/1B			1B/1B	1	1/1;1/1B;1/2;1/3;1/4;1/5;1/6;1/7;1/8;1/9;1/10;1/11;1/12;1/13;1/14;1/15;1/16;1/17;1/18;1/19;1/20;1/21;1/22;1/23;1/24;1/25;1/26;1/27;1/28;1/29;1/30;1/31;1/32;1/33;1/34;1/35;1/36;1/NV_1;1B/1B;1B/2;1B/3;1B/4;1B/5;1B/6;1B/7;1B/8;1B/9;1B/10;1B/11;1B/12;1B/13;1B/14;1B/15;1B/16;1B/17;1B/18;1B/19;1B/20;1B/21;1B/22;1B/23;1B/24;1B/25;1B/26;1B/27;1B/28;1B/29;1B/30;1B/31;1B/32;1B/33;1B/34;1B/35;1B/36;1B/NV_1;…	1
NA18544	2	SLCO1B1	1B/17	15/21	1	1B/15	?	1/1;1/1B;1/2;1/3;1/4;1/5;1/6;1/7;1/8;1/9;1/10;1/11;1/12;1/13;1/14;1/15;1/16;1/17;1/18;1/19;1/20;1/21;1/22;1/23;1/24;1/25;1/26;1/27;1/28;1/29;1/30;1/31;1/32;1/33;1/34;1/35;1/36;1/NV_1;1B/1B;1B/2;1B/3;1B/4;1B/5;1B/6;1B/7;1B/8;1B/9;1B/10;1B/11;1B/12;1B/13;1B/14;1B/15;1B/16;1B/17;1B/18;1B/19;1B/20;1B/21;1B/22;1B/23;1B/24;1B/25;1B/26;1B/27;1B/28;1B/29;1B/30;1B/31;1B/32;1B/33;1B/34;1B/35;1B/36;1B/NV_1;…	1
NA18552	2	SLCO1B1	1/15			1B/15	1	1/1;1/1B;1/2;1/3;1/4;1/5;1/6;1/7;1/8;1/9;1/10;1/11;1/12;1/13;1/14;1/15;1/16;1/17;1/18;1/19;1/20;1/21;1/22;1/23;1/24;1/25;1/26;1/27;1/28;1/29;1/30;1/31;1/32;1/33;1/34;1/35;1/36;1/NV_1;1B/1B;1B/2;1B/3;1B/4;1B/5;1B/6;1B/7;1B/8;1B/9;1B/10;1B/11;1B/12;1B/13;1B/14;1B/15;1B/16;1B/17;1B/18;1B/19;1B/20;1B/21;1B/22;1B/23;1B/24;1B/25;1B/26;1B/27;1B/28;1B/29;1B/30;1B/31;1B/32;1B/33;1B/34;1B/35;1B/36;1B/NV_1;…	1
NA18564	2	SLCO1B1	1/1			1/1B	1	1/1;1/1B;1/2;1/3;1/4;1/5;1/6;1/7;1/8;1/9;1/10;1/11;1/12;1/13;1/14;1/15;1/16;1/17;1/18;1/19;1/20;1/21;1/22;1/23;1/24;1/25;1/26;1/27;1/28;1/29;1/30;1/31;1/32;1/33;1/34;1/35;1/36;1/NV_1;1B/1B;1B/2;1B/3;1B/4;1B/5;1B/6;1B/7;1B/8;1B/9;1B/10;1B/11;1B/12;1B/13;1B/14;1B/15;1B/16;1B/17;1B/18;1B/19;1B/20;1B/21;1B/22;1B/23;1B/24;1B/25;1B/26;1B/27;1B/28;1B/29;1B/30;1B/31;1B/32;1B/33;1B/34;1B/35;1B/36;1B/NV_1;…	1
NA18855	2	SLCO1B1	1B/1B			1B/1B	1	1/1;1/1B;1/2;1/3;1/4;1/5;1/6;1/7;1/8;1/9;1/10;1/11;1/12;1/13;1/14;1/15;1/16;1/17;1/18;1/19;1/20;1/21;1/22;1/23;1/24;1/25;1/26;1/27;1/28;1/29;1/30;1/31;1/32;1/33;1/34;1/35;1/36;1/NV_1;1B/1B;1B/2;1B/3;1B/4;1B/5;1B/6;1B/7;1B/8;1B/9;1B/10;1B/11;1B/12;1B/13;1B/14;1B/15;1B/16;1B/17;1B/18;1B/19;1B/20;1B/21;1B/22;1B/23;1B/24;1B/25;1B/26;1B/27;1B/28;1B/29;1B/30;1B/31;1B/32;1B/33;1B/34;1B/35;1B/36;1B/NV_1;…	1
NA18868	2	SLCO1B1	1B/1B	1B/44	1	1B/44	1	1/1;1/1B;1/2;1/3;1/4;1/5;1/6;1/7;1/8;1/9;1/10;1/11;1/12;1/13;1/14;1/15;1/16;1/17;1/18;1/19;1/20;1/21;1/22;1/23;1/24;1/25;1/26;1/27;1/28;1/29;1/30;1/31;1/32;1/33;1/34;1/35;1/36;1/NV_1;1B/1B;1B/2;1B/3;1B/4;1B/5;1B/6;1B/7;1B/8;1B/9;1B/10;1B/11;1B/12;1B/13;1B/14;1B/15;1B/16;1B/17;1B/18;1B/19;1B/20;1B/21;1B/22;1B/23;1B/24;1B/25;1B/26;1B/27;1B/28;1B/29;1B/30;1B/31;1B/32;1B/33;1B/34;1B/35;1B/36;1B/NV_1;…	1
NA19109	2	SLCO1B1	1/15			1B/15	1	1/1;1/1B;1/2;1/3;1/4;1/5;1/6;1/7;1/8;1/9;1/10;1/11;1/12;1/13;1/14;1/15;1/16;1/17;1/18;1/19;1/20;1/21;1/22;1/23;1/24;1/25;1/26;1/27;1/28;1/29;1/30;1/31;1/32;1/33;1/34;1/35;1/36;1/NV_1;1B/1B;1B/2;1B/3;1B/4;1B/5;1B/6;1B/7;1B/8;1B/9;1B/10;1B/11;1B/12;1B/13;1B/14;1B/15;1B/16;1B/17;1B/18;1B/19;1B/20;1B/21;1B/22;1B/23;1B/24;1B/25;1B/26;1B/27;1B/28;1B/29;1B/30;1B/31;1B/32;1B/33;1B/34;1B/35;1B/36;1B/NV_1;…	1
NA19122	2	SLCO1B1	1B/1B			1B/1B	1	1/1;1/1B;1/2;1/3;1/4;1/5;1/6;1/7;1/8;1/9;1/10;1/11;1/12;1/13;1/14;1/15;1/16;1/17;1/18;1/19;1/20;1/21;1/22;1/23;1/24;1/25;1/26;1/27;1/28;1/29;1/30;1/31;1/32;1/33;1/34;1/35;1/36;1/NV_1;1B/1B;1B/2;1B/3;1B/4;1B/5;1B/6;1B/7;1B/8;1B/9;1B/10;1B/11;1B/12;1B/13;1B/14;1B/15;1B/16;1B/17;1B/18;1B/19;1B/20;1B/21;1B/22;1B/23;1B/24;1B/25;1B/26;1B/27;1B/28;1B/29;1B/30;1B/31;1B/32;1B/33;1B/34;1B/35;1B/36;1B/NV_1;…	1
NA19147	2	SLCO1B1	1B/1B	20/30	1	20/30	1	1/1;1/1B;1/2;1/3;1/4;1/5;1/6;1/7;1/8;1/9;1/10;1/11;1/12;1/13;1/14;1/15;1/16;1/17;1/18;1/19;1/20;1/21;1/22;1/23;1/24;1/25;1/26;1/27;1/28;1/29;1/30;1/31;1/32;1/33;1/34;1/35;1/36;1/NV_1;1B/1B;1B/2;1B/3;1B/4;1B/5;1B/6;1B/7;1B/8;1B/9;1B/10;1B/11;1B/12;1B/13;1B/14;1B/15;1B/16;1B/17;1B/18;1B/19;1B/20;1B/21;1B/22;1B/23;1B/24;1B/25;1B/26;1B/27;1B/28;1B/29;1B/30;1B/31;1B/32;1B/33;1B/34;1B/35;1B/36;1B/NV_1;…	1
NA19174	2	SLCO1B1	1A/1B	1/27	1	1/27	1	1/1;1/1B;1/2;1/3;1/4;1/5;1/6;1/7;1/8;1/9;1/10;1/11;1/12;1/13;1/14;1/15;1/16;1/17;1/18;1/19;1/20;1/21;1/22;1/23;1/24;1/25;1/26;1/27;1/28;1/29;1/30;1/31;1/32;1/33;1/34;1/35;1/36;1/NV_1;1B/1B;1B/2;1B/3;1B/4;1B/5;1B/6;1B/7;1B/8;1B/9;1B/10;1B/11;1B/12;1B/13;1B/14;1B/15;1B/16;1B/17;1B/18;1B/19;1B/20;1B/21;1B/22;1B/23;1B/24;1B/25;1B/26;1B/27;1B/28;1B/29;1B/30;1B/31;1B/32;1B/33;1B/34;1B/35;1B/36;1B/NV_1;…	1
NA19207	2	SLCO1B1	1A/1B	1B/41	1	1B/41	1	1/1;1/1B;1/2;1/3;1/4;1/5;1/6;1/7;1/8;1/9;1/10;1/11;1/12;1/13;1/14;1/15;1/16;1/17;1/18;1/19;1/20;1/21;1/22;1/23;1/24;1/25;1/26;1/27;1/28;1/29;1/30;1/31;1/32;1/33;1/34;1/35;1/36;1/NV_1;1B/1B;1B/2;1B/3;1B/4;1B/5;1B/6;1B/7;1B/8;1B/9;1B/10;1B/11;1B/12;1B/13;1B/14;1B/15;1B/16;1B/17;1B/18;1B/19;1B/20;1B/21;1B/22;1B/23;1B/24;1B/25;1B/26;1B/27;1B/28;1B/29;1B/30;1B/31;1B/32;1B/33;1B/34;1B/35;1B/36;1B/NV_1;…	1
NA19226	2	SLCO1B1	1/1	1/31	1	1B/31	1	1/1;1/1B;1/2;1/3;1/4;1/5;1/6;1/7;1/8;1/9;1/10;1/11;1/12;1/13;1/14;1/15;1/16;1/17;1/18;1/19;1/20;1/21;1/22;1/23;1/24;1/25;1/26;1/27;1/28;1/29;1/30;1/31;1/32;1/33;1/34;1/35;1/36;1/NV_1;1B/1B;1B/2;1B/3;1B/4;1B/5;1B/6;1B/7;1B/8;1B/9;1B/10;1B/11;1B/12;1B/13;1B/14;1B/15;1B/16;1B/17;1B/18;1B/19;1B/20;1B/21;1B/22;1B/23;1B/24;1B/25;1B/26;1B/27;1B/28;1B/29;1B/30;1B/31;1B/32;1B/33;1B/34;1B/35;1B/36;1B/NV_1;…	1
NA19239	2	SLCO1B1	1/1			1B/1B	1	1/1;1/1B;1/2;1/3;1/4;1/5;1/6;1/7;1/8;1/9;1/10;1/11;1/12;1/13;1/14;1/15;1/16;1/17;1/18;1/19;1/20;1/21;1/22;1/23;1/24;1/25;1/26;1/27;1/28;1/29;1/30;1/31;1/32;1/33;1/34;1/35;1/36;1/NV_1;1B/1B;1B/2;1B/3;1B/4;1B/5;1B/6;1B/7;1B/8;1B/9;1B/10;1B/11;1B/12;1B/13;1B/14;1B/15;1B/16;1B/17;1B/18;1B/19;1B/20;1B/21;1B/22;1B/23;1B/24;1B/25;1B/26;1B/27;1B/28;1B/29;1B/30;1B/31;1B/32;1B/33;1B/34;1B/35;1B/36;1B/NV_1;…	1
HG00276	2	TPMT	1/16			1/16	1	1/1	0
HG01190	2	TPMT	1/1			1/1	1	1/1	1
NA07019	2	TPMT	1/1			1/1	1	1/1	1
NA07357	2	TPMT	1/1			1/1	1	1/1	1
NA10831	2	TPMT	1/1			1/1	1	1/1	1
NA11832	2	TPMT	1/1			1/1	1	1/1	1
NA18484	2	TPMT	1/1			1/1	1	1/1	1
NA18518	2	TPMT	1/1			1/1	1	1/1	1
NA18519	2	TPMT	1/1			1/1	1	1/1	1
NA18544	2	TPMT	1/1			1/1	1	1/1	1
NA18552	2	TPMT	1/1			1/1	1	1/1	1
NA18564	2	TPMT	1/1			1/1	1	1/1	1
NA18855	2	TPMT	1/3C			1/3C	1	1/1	0
NA18868	2	TPMT	1/1			1/1	1	1/1	1
NA19109	2	TPMT	1/1			1/1	1	1/1	1
NA19122	2	TPMT	1/1			1/1	1	1/1	1
NA19147	2	TPMT	1/1			1/1	1	1/1	1
NA19174	2	TPMT	1/1			1/1	1	1/1	1
NA19207	2	TPMT	1/1			1/1	1	1/1	1
NA19226	2	TPMT	1/1			1/1	1	1/1	1
NA19239	2	TPMT	1/1			1/1	1	1/1	1
